# Supplementary material
Source: publisher figshare collection journal article supplement (https://gsajournals.figshare.com/ndownloader/files/13164569)
Supplement: Supplementary file 1 [file 13164569]

## Sheet: Information
Dataset 4
Clustering analysis of 2,075 genes with significant differential expression (FDR < 0.01) based on EdgeR analysis.
Differential expression for each alcohol (0.8% Butanol, 1% Isobutanol, and 3% Ethanol) was compared to YPD under anaerobic conditions, across strains.
Columns:
Gene ID
Gene Name
Transcriptional comparation information:	Alcohol (But = 0.8% Butanol, Iso = 1% Isobutanol, Eth = 3% Ethanol)
	YPD
	ANA = Anaerobic
	Strain (WA = West African, PAP = Papaya, IL = IL01)
Rep	Replicate 1 or 2

## Sheet: AlcoholvsYPD_ANA.VII.tsv.cdt
Gene	NAME	But.YPD_ANA_WA_R1	But.YPD_ANA_WA_R2	But.YPD_ANA_IL_R1	But.YPD_ANA_IL_R2	But.YPD_ANA_PAP_R1	But.YPD_ANA_PAP_R2	0	Iso.YPD_ANA_WA_R1	Iso.YPD_ANA_WA_R2	Iso.YPD_ANA_IL_R1	Iso.YPD_ANA_IL_R2	Iso.YPD_ANA_PAP_R1	Iso.YPD_ANA_PAP_R2	0	Eth.YPD_ANA_WA_R1	Eth.YPD_ANA_WA_R2	Eth.YPD_ANA_IL_R1	Eth.YPD_ANA_IL_R2	Eth.YPD_ANA_PAP_R1	Eth.YPD_ANA_PAP_R2
Cluster_1	#N/A	0	0	0	0	0	0	0	0	0	0	0	0	0	0	0	0	0	0	0	0
YFL059W	YFL059W ... SNZ3 thiamin biosynthesis* protein binding cellular component unknown | YFL060C	-0.304741	0.830008	0	-3.45872	-3.27086	-3.33516	0	-0.202857	0.248194	0	-3.27854	0	0	0	-4.14296	-4.19851	0	-3.49633	0	-3.2787
Q0050	Q0050 ... AI1 mRNA processing* endonuclease activity* mitochondrion | Q0055	1.28108	1.67688	0.840483	1.52769	0.350118	1.33197	0	1.47639	1.04545	1.39026	1.25563	0.744983	1.3116	0	-8.15107	-9.68336	0.418896	1.19186	0.177391	0.952691
YFR023W	YFR023W ... PES4 biological process unknown molecular function unknown cellular component unknown | YFR024C-A	0	0	-2.83026	-0.175463	4.23477	-4.36855	0	-4.15937	0	-0.848572	3.17465	0.989343	0	0	0	-4.10116	-2.89516	2.78693	4.23477	-4.31209
Q0115	Q0115 ... BI3 Group I intron splicing RNA binding mitochondrion | Q0120	0.388385	1.19648	-3.58968	-4.25153	0.486914	1.40101	0	0.265975	0.414318	-3.60799	0	-0.850192	0.704342	0	1.30314	2.625	-3.65458	-4.28913	-0.101125	0.172067
YLL028W	YLL028W ... TPO1 polyamine transport spermine transporter activity* plasma membrane* | YLL029W	0.160892	0.474011	-3.09444	-2.99917	-1.82639	-1.22052	0	1.94284	2.42651	-2.44317	-2.93892	-0.806337	-0.235364	0	-0.721808	-0.385147	-1.98618	-2.72723	-1.4158	-0.949891
YCL064C	YCL064C ... CHA1 threonine catabolism* L-serine ammonia-lyase activity* mitochondrion* | YCL065W	-1.61001	-1.63596	-2.81409	-2.51895	-3.31741	-0.547289	0	-3.70777	-3.01839	-1.46043	-2.99528	-3.30749	-2.82086	0	1.3912	1.46971	-0.000664	-0.640384	2.32658	3.44044
YKL178C	YKL178C ... STE3 signal transduction during con mating-type a-factor pheromone receintegral to plasma membrane | YKL179C	0.0822818	0.322008	-3.45246	-2.52934	0	-2.99074	0	2.62587	2.45871	-1.47077	-0.764192	-2.28266	-2.98697	0	-0.0447845	0.415545	-1.19543	-0.981984	-3.77751	-2.93428
YGR035C	YGR035C ... YGR035C biological process unknown molecular function unknown cellular component unknown | YGR035W-A	-1.95846	-1.56696	-4.63613	-3.60969	-1.58733	-1.08853	0	-0.703905	-0.589293	-3.91747	-3.42951	-1.46437	-0.48069	0	-2.88913	-3.64335	-4.11606	-3.28473	-1.47157	-1.06122
YOL161C	YOL161C ... YOL161C biological process unknown molecular function unknown cellular component unknown | YOL162W	-0.239646	-0.552461	-4.81002	-4.77372	0.123166	0.171362	0	0.699872	1.29474	-3.45449	-3.93773	0.455007	-0.497292	0	-1.70775	-1.45892	-3.47951	-2.19855	-1.06494	-0.274679
YFL051C	YFL051C ... YFL051C biological process unknown molecular function unknown cellular component unknown | YFL052W	-1.0332	-0.299481	-1.30461	-2.36811	-0.654441	0.215144	0	-0.881923	-0.622208	-1.05989	-2.82535	-0.59562	-0.781085	0	2.8322	2.36508	0.556486	1.09981	5.13111	5.12335
YMR011W	YMR011W ... HXT2 hexose transport glucose transporter activity* plasma membrane | YMR012W	-2.46154	-2.38922	-2.46213	-2.78041	-1.98333	-1.35179	0	-3.98583	-3.3296	-3.70178	-2.57794	-1.76357	-1.10149	0	0.070146	-0.129393	-1.2649	-0.889238	-0.342886	0.473726
YPL061W	YPL061W ... ALD6 acetate biosynthesis aldehyde dehydrogenase activity cytoplasm* | YPL062W	-1.21511	0.00651718	-3.43763	-2.32798	-2.28308	-1.87936	0	-3.42878	-2.67916	-4.22123	-4.09801	-3.41407	-2.78115	0	0.378296	0.410785	-0.255438	0.128221	-1.14166	-0.608435
YPL033C	YPL033C … SRL4 meiosis* molecular function unknown | Protein of unknown function; involved in regulation of dNTP production; null mutant suppresses the lethality of lcd1 and rad53 mutations; expression is induced by Kar4pYPL034W	-3.0997	-2.66182	-0.712428	0.824537	-3.18641	-0.928782	0	-0.0415351	-0.662622	0.43919	3.91161	-1.54262	-0.661976	0	-2.90484	-2.98332	-1.19236	3.24636	-2.03748	0
YOL156W	YOL156W ... HXT11 hexose transport glucose transporter activity* plasma membrane | YOL157C	-0.654684	-2.67202	-1.20508	-2.98282	0	0	0	-0.596521	-0.994746	-0.223387	-2.80263	0	0	0	-0.459822	-2.99352	1.43046	3.1495	0	0
YMR317W	YMR317W ... YMR317W biological process unknown molecular function unknown cellular component unknown | YMR318C	-3.11505	-3.71	-2.10725	-1.74197	-0.954925	-0.280522	0	-3.89664	-3.28838	-3.44569	-2.85994	-1.20486	-0.57877	0	-0.287791	0.0667987	-0.516564	0.876242	-0.980298	0.129776
YGL261C	YGL261C ... YGL261C biological process unknown molecular function unknown cellular component unknown | YGL262W	-1.87901	0	-2.61332	-5.76642	-2.83614	-3.47948	0	-1.82085	-0.1789	-0.403823	-1.41631	-3.18811	-3.7458	0	4.31585	5.12001	-2.72975	-0.926285	-7.18546	-6.19561
YJL038C	YJL038C … LOH1 biological process unknown molecular function unknown | Protein of unknown function with proposed role in maintenance of genome integrity; deletion mutant displays elevated rates of LOH; induced during sporulation; repressed during vegetative growth by Sum1p and Hst1p; sequence similar to IRC1YJL039C	-1.74151	-2.30363	2.33924	1.4095	-2.82822	1.0225	0	0	-2.62636	2.80636	1.00472	-1.18443	1.02627	0	-0.546644	-1.62513	3.41185	2.87439	-2.67929	-0.921042
YHR214W-A	YHR214W-A | YHR215W	0	0	-3.75087	-2.55589	2.31723	2.47351	0	0	0	-3.59925	-3.23368	2.31723	2.47351	0	0	0	-2.90888	-2.75103	2.31723	2.47351
YPR194C	YPR194C ... OPT2 oligopeptide transport oligopeptide transporter activity integral to plasma membrane | YPR195C	0.317835	0.628203	0.824668	-0.0234597	7.08365	8.86799	0	-0.150959	0.161885	1.45844	0.00472325	3.61383	4.78116	0	-9.6796	-9.84812	0.274343	0.201969	5.41335	6.73001
YDR040C	YDR040C ... ENA1 sodium ion transport "ATPase activity, coupled to transme"plasma membrane | YDR041W	-4.23965	-2.37843	-5.375	-1.27425	-1.65444	-0.240536	0	-3.18148	1.2366	-3.07138	-5.42154	-1.59562	-2.55869	0	-0.874859	-0.378005	-3.4399	-2.73244	-2.50552	-0.921042
Q0065	Q0065 ... AI4 RNA splicing* endonuclease activity mitochondrion | Q0070	0.223078	0.649172	0	0	0.65972	1.41832	0	0.755676	-0.063261	0	-4.17607	0.883917	1.05863	0	-8.88241	-5.72244	-2.17435	0	-0.218475	0.509592
YBR186W	YBR186W ... PCH2 regulation of meiosis molecular function unknown nucleolus | YBR187W	1.87583	-1.07942	2.82467	3.18209	-2.18896	-1.6683	0	0.818516	-0.987106	3.84031	2.81208	-4.13014	-2.66453	0	0.370253	-1.98588	1.53738	2.43079	-3.04004	-4.19681
YBR296C	YBR296C ... PHO89 phosphate transport sodium:inorganic phosphate symporteplasma membrane | YBR296C-A	-3.68653	-3.90681	-1.48519	-1.5905	-1.06948	1.40101	0	-2.13804	-2.03314	-1.00099	-0.907814	0.126847	1.16377	0	-7.88399	-7.81327	-0.965123	-0.458181	-2.24248	0.341992
YHR094C	YHR094C ... HXT1 hexose transport glucose transporter activity* plasma membrane | YHR095W	-5.81959	-3.95685	-4.96649	-4.89675	-1.99548	-1.29943	0	-3.76143	-4.27958	-4.39984	-2.89259	-1.25858	-1.7107	0	-7.20969	-7.04389	-6.03139	-6.33645	-1.58352	-4.82793
YLR307W	YLR307W ... CDA1 spore wall assembly (sensu Fun chitin deacetylase activity chitosan layer of spore wall | YLR308W	-2.19855	2.08268	0	-2.47312	0	-3.34956	0	-3.14039	2.08268	0.170411	-0.97101	-3.22644	-3.34579	0	-2.00369	2.08268	-1.87618	-1.1888	0	0
YJR151C	YJR151C ... DAN4 biological process unknown molecular function unknown cell wall (sensu Fungi) | YJR151W-A	-2.41193	-1.54487	-2.21097	-3.51456	-3.35398	-2.80858	0	-2.49819	-1.85068	-2.98125	-3.48534	-3.19697	-2.8264	0	-0.161243	-0.200086	-0.983047	-0.693123	-2.19	-1.2138
YAL063C	YAL063C ... FLO9 flocculation (sensu Saccharomy mannose binding cell wall (sensu Fungi) | YAL063C-A	0.0342152	0.176402	0	-5.60432	-0.528911	0.970031	0	0.510782	0.987692	0	0	-0.184686	0.306378	0	-4.19046	-3.38031	-4.00737	-5.64192	0.0794474	0.557005
YOR028C	YOR028C ... CIN5 regulation of transcription fr DNA binding* nucleus | YOR029W	-1.23965	-0.262955	-2.44212	-1.93035	1.60187	-3.32061	0	1.92995	-1.58568	-4.46043	-2.48618	1.60187	-2.31684	0	1.95522	1.58547	-0.114699	-0.541691	1.60187	-2.26415
YHL043W	YHL043W ... ECM34 cell wall organization and bio molecular function unknown cellular component unknown | YHL044W	-0.662618	-0.50782	-0.168838	-1.16369	-2.2394	-2.34674	0	-0.132222	0.229615	-0.371178	-1.41822	-4.59562	-3.34296	0	-1.19181	-1.24965	-0.686703	-0.1159	-2.50552	-3.55331
YAL065C	YAL065C ... YAL065C biological process unknown molecular function unknown cellular component unknown | YAL066W	0.512426	1.32201	-0.790042	-0.438497	-0.554906	1.60746	0	0.271029	0.539849	1.09854	-0.410314	-0.818012	0.611233	0	-2.5162	-1.60393	-0.533012	-1.4761	4.15474	5.46266
YOL052C-A	YOL052C-A ... DDR2 response to stress molecular function unknown cytoplasm* | YOL053W	1.40759	0.523532	3.78285	-0.627975	0.583909	-1.29943	0	0	-0.799195	3.76454	-3.11075	0.642731	-2.23407	0	-0.719481	-0.797969	0.800412	-0.454076	0	-2.23407
YHR033W	YHR033W ... YHR033W biological process unknown molecular function unknown cytoplasm | YHR034C	-0.327109	-0.99992	1.01731	0.787178	3.7053	-0.562464	0	-0.809515	-0.622208	0.999006	-2.99528	3.7053	-1.55869	0	-4.13225	-4.32142	0.952415	0.487372	0.0794474	0.078958
YOR273C	YOR273C ... TPO4 polyamine transport spermine transporter activity* plasma membrane* | YOR274W	-2.68421	-2.65662	1.27693	-0.719629	2.72407	3.6798	0	-3.68133	-3.56431	0.531445	-3.20782	-0.217108	-0.00475662	0	-3.87221	-3.46072	-1.55502	-2.3422	0.872997	0.501649
Cluster_2	#N/A	0	0	0	0	0	0	0	0	0	0	0	0	0	0	0	0	0	0	0	0
YPR062W	YPR062W ... FCY1 pyrimidine salvage* cytosine deaminase activity cytoplasm* | YPR063C	-0.0970419	0.253591	-0.783706	-0.72995	-0.145428	-0.137158	0	0.0713661	-0.0659548	-1.11732	-0.838742	-0.171938	0.0262703	0	-0.618084	-1.04579	-1.15294	-0.982824	-0.763011	-0.122218
YGL116W	YGL116W ... CDC20 mitotic sister chromatid segre enzyme activator activity anaphase-promoting complex | YGL117W	-0.308541	0.0382147	-0.832065	-0.5238	0.00852353	1.28152	0	-0.16661	-0.203212	-0.913938	-0.795821	0.179314	0.947199	0	-0.244924	0.29469	-0.766259	-0.155085	-0.317888	1.09807
YNL112W	YNL112W ... DBP2 mRNA catabolism, nonsense-medi RNA helicase activity cytoplasm* | YNL113W	-0.216746	0.00765275	-1.23794	-0.543195	-1.42111	-0.106086	0	0.141214	-0.195536	-1.33598	-0.965732	-0.924347	0.0832839	0	-1.04094	-1.356	-1.3395	-0.947962	-0.339112	0.724513
YAL022C	YAL022C ... FUN26 nucleoside transport nucleoside transporter activity membrane* | YAL023C	-0.00466029	-0.0663255	-0.701618	-0.661724	0.366417	0.383144	0	0.0884785	0.315238	-1.43613	-0.736418	0.310337	0.495114	0	-0.51467	-1.02959	-0.688043	-0.653343	-0.297198	-0.0164616
YMR209C	YMR209C ... YMR209C biological process unknown molecular function unknown cellular component unknown | YMR210W	-0.883709	-0.651574	-0.746512	-0.182938	0.243111	0.571629	0	-0.60094	-0.332308	-1.00671	-0.406591	0.101236	0.500951	0	-0.980079	-0.888352	-0.358153	-0.220543	0.1751	0.580356
YLR083C	YLR083C PAC cluster EMP70 transport transporter activity membrane fraction* | YLR084C	-0.931566	-0.738692	-0.775601	-0.478472	-0.597741	0.281233	0	-0.620778	-0.44926	-1.13245	-0.591607	-0.332078	0.190842	0	-0.778498	-1.09243	-0.495044	-0.66512	-0.10117	0.419995
YDR367W	YDR367W ... YDR367W biological process unknown molecular function unknown cytoplasm* | YDR368W	-0.436785	-0.126601	-0.0849678	0.405846	0.756962	0.60212	0	-0.501319	-0.23342	-0.691185	-0.0307365	0.253905	0.65223	0	-0.691785	-0.930082	-0.435452	-0.402277	0.631433	0.444369
YML125C	YML125C … PGA3 biological process unknown molecular function unknown | Putative cytochrome b5 reductase, localized to the plasma membrane; may be involved in regulation of lifespan; required for maturation of Gas1p and Pho8p, proposed to be involved in protein traffickingYML126C	-0.681156	-0.0552806	0.206393	0.551101	0.372548	0.9971	0	-0.618547	0.0810625	0.178968	0.231646	0.29984	1.10922	0	-0.743995	-0.609144	-0.339396	-0.559017	0.18299	0.957997
YKL191W	YKL191W ... DPH2 peptidyl-diphthamide biosynthe molecular function unknown cytoplasm | YKL192C	-0.45457	-0.262955	-0.46268	-0.316489	-0.671395	-0.0222131	0	-0.526687	-0.442847	0.0568101	-0.242405	-0.231178	0.694573	0	-0.756186	-0.798711	-0.745758	-0.668108	0.0407303	0.56825
YKR042W	YKR042W ... UTH1 mitochondrion organization and molecular function unknown cell wall (sensu Fungi)* | YKR043C	-0.0156303	0.0123418	-0.503345	-0.745796	-1.03225	0.0490357	0	-0.199721	0.0921006	0.220137	-0.974666	-0.43389	0.252992	0	-1.32728	-1.62945	-0.0158586	-0.240427	-0.431762	0.313289
YPL273W	YPL273W PAC cluster SAM4 sulfur amino acid metabolism homocysteine S-methyltransferase accytoplasm* | YPL274W	-0.91	-0.300405	-0.964119	0.247965	-0.240623	0.43696	0	-0.599103	-0.672336	-1.37428	0.266209	0.434128	0.926776	0	-0.692446	-0.729697	-0.249873	-0.310284	0.150249	0.631708
YNL160W	YNL160W iESR cluster YGP1 response to stress* molecular function unknown cell wall (sensu Fungi) | YNL161W	0.902031	0.794681	1.66995	-0.0821074	2.33436	2.86082	0	0.0709745	1.12597	2.55736	-0.758615	2.47954	2.02931	0	-0.214135	-0.494829	0.271359	-0.35751	0.944421	1.43101
YEL068C	YEL068C ... | YEL069C	-0.591706	0.0924331	-0.0809507	0.331026	0.812024	0.896968	0	-0.646606	-0.129919	-0.197886	-0.0166504	0.353062	0.845904	0	-1.14473	-0.975514	-0.158616	-0.39364	0.31727	0.643221
YNL124W	YNL124W PAC cluster NAF1 transport* RNA binding* nucleoplasm | YNL125C	0.507167	0.545591	-0.302228	0.162706	0.309376	0.664363	0	0.429592	-0.0603084	-0.273615	-0.079341	0.343951	0.929841	0	-0.315746	-0.434121	-0.810256	-0.741316	-0.349052	0.35026
YIL047C-A	YIL047C-A | YIL048W	-0.502681	0.184504	1.01731	0.502609	0.80499	1.60746	0	0.692986	0.99928	1.45844	-0.14728	1.10482	2.11373	0	-0.459822	-2.45892	0.75977	0.371894	1.40138	2.32689
YLR084C	YLR084C ... RAX2 bud site selection molecular function unknown mitochondrion* | YLR085C	-0.590535	-0.282879	-0.781574	-0.445481	-0.470696	0.366574	0	-0.352875	-0.267356	-0.824424	-0.258071	-0.112951	0.550179	0	-0.490112	-0.519387	-0.321853	-0.145026	-0.275648	0.574879
YKR003W	YKR003W ... OSH6 steroid biosynthesis oxysterol binding cellular component unknown | YKR004C	-0.590949	0.106505	-0.10794	-0.057576	0.127387	0.530963	0	-0.361546	-0.289927	-0.214038	-0.313505	-0.0803702	0.368376	0	-0.363031	-0.112506	-0.621899	-0.543787	-0.665147	-0.0384679
YML113W	YML113W ... DAT1 negative regulation of transcr AT DNA binding nucleus | YML114C	-0.348994	-0.859933	-1.1098	-0.729728	-0.176863	0.118076	0	-0.181484	-0.779304	-0.836875	-1.41896	-0.481548	0.254298	0	-0.066001	-0.850227	-0.899062	-1.08926	-0.293596	0.340345
YDR309C	YDR309C ... GIC2 establishment of cell polarity small GTPase regulator activity bud tip* | YDR310C	0.952999	0.992255	-0.25494	-0.0499319	-0.00292779	1.09454	0	0.766049	0.473766	-0.437634	-0.0416324	-0.238219	0.337731	0	-0.736662	-0.958466	-0.614285	-0.688267	-0.926758	0.121771
YBR238C	YBR238C PAC cluster YBR238C biological process unknown molecular function unknown cytoplasm* | YBR239C	-0.35592	-0.0891524	-0.369609	-0.510162	-0.517021	0.647881	0	-0.175522	-0.0555514	-0.481712	-0.319176	-0.203042	0.70134	0	-1.00182	-1.10236	-0.439657	-0.591795	-0.594628	0.584807
YIL029C	YIL029C ... YIL029C biological process unknown molecular function unknown cellular component unknown | YIL029W-A	0.711444	0.621568	0	0	2.73788	2.34443	0	0.303943	0.822403	0	0	2.23727	2.68924	0	-2.02652	-1.69629	0	0	0.66441	2.40089
YNL164C	YNL164C ... IBD2 mitotic spindle checkpoint molecular function unknown nucleus | YNL165W	-0.466715	0.196477	-0.783783	-0.0599856	-0.281632	0.0478096	0	-0.564203	0.096142	-0.387053	-0.130206	-0.52347	-0.0659882	0	-0.581538	0.134363	-1.11172	-0.52857	-0.191004	-0.0547205
YOR373W	YOR373W ... NUD1 microtubule nucleation structural constituent of cytoskelespindle pole body | YOR374W	-0.572515	-0.481526	-1.44835	-0.467461	-1.02057	0.266534	0	-0.284137	-0.564787	-1.17247	-0.222906	-0.610622	0.303189	0	-0.586795	-0.51352	-0.0538169	0.0559278	-0.386216	0.355876
YGR247W	YGR247W ... CPD1 meiosis* "2',3'-cyclic-nucleotide 3'-phosphod"clathrin-coated vesicle | YGR248W	-0.618158	0.259723	0.294847	0.43222	0.709612	0.65596	0	-0.379423	-0.106073	0.240014	0.166995	0.0588839	0.384724	0	-0.827686	-0.476815	0.13684	0.301505	0.354307	0.793556
YPR198W	YPR198W ... SGE1 response to drug* xenobiotic-transporting ATPase actiintegral to plasma membrane | YPR199C	-0.069223	-0.260652	0.114582	-0.496585	0.259393	0.372409	0	-0.105765	0.226931	-0.00230173	-0.663223	-0.0998049	0.0518235	0	-0.396927	-0.453461	-0.761647	-0.391384	-1.16596	-0.562258
YKL106W	YKL106W ... AAT1 aspartate biosynthesis* aspartate transaminase activity mitochondrion | YKL107W	-0.609403	0.0130574	-0.216484	0.437211	0.385805	0.843442	0	-0.72624	-0.548505	-0.178037	0.428912	0.411009	1.14629	0	-0.802812	-0.541642	-0.101596	-0.23954	0.56216	1.15864
YDL012C	YDL012C ... YDL012C biological process unknown molecular function unknown plasma membrane | YDL013W	-0.876271	-0.4682	-0.982687	-0.283445	0.186251	0.132376	0	-0.730645	-0.696462	-0.416032	-0.457312	-0.354611	0.20195	0	-0.738895	-0.597055	-0.542793	-0.902281	0.0881647	0.522259
YOL002C	YOL002C ... IZH2 lipid metabolism* metal ion binding integral to membrane* | YOL003C	-0.981476	-0.605931	1.15854	0.679855	1.75733	1.73993	0	-1.02905	-0.8008	0.832727	0.0174727	0.593758	0.775643	0	-0.555355	-0.648349	0.401341	0.485997	1.5091	1.38909
YDL052C	YDL052C ... SLC1 sphingolipid biosynthesis 1-acylglycerol-3-phosphate O-acyltrlipid particle | YDL053C	-0.572668	0.131842	0.15001	0.505483	0.741347	0.671901	0	-0.624149	-0.0111793	0.0567729	0.344509	0.523523	0.686984	0	-0.518205	-0.363979	0.363047	0.321781	0.675594	0.793848
YDR454C	YDR454C RP cluster GUK1 GMP metabolism guanylate kinase activity cytoplasm* | YDR455C	-0.531517	-0.0645413	-0.417936	0.223413	0.037284	0.111373	0	-0.655415	-0.23591	-1.04253	-0.0277842	-0.119048	0.450554	0	-0.535689	-0.544327	-0.191848	-0.535942	0.658003	0.743875
YLL027W	YLL027W ... ISA1 iron ion transport molecular function unknown mitochondrial matrix | YLL028W	-0.641009	0.0138853	-0.560307	-0.492379	-0.0244915	0.377521	0	-0.433022	-0.213893	-0.749456	-0.882635	-0.247813	0.212925	0	-0.881286	-0.914831	-1.00885	-0.794687	-0.714102	-0.0989598
YBR265W	YBR265W ... TSC10 sphingolipid biosynthesis* "oxidoreductase activity, acting on"cytoplasm* | YBR266C	-0.966692	-0.543406	-0.854143	-0.677963	-0.223513	-0.439013	0	-0.965237	-0.639575	-1.0862	-0.853494	-0.420968	-0.124809	0	-0.41029	-0.473424	-0.168891	-0.337057	-0.0148799	0.171548
YMR274C	YMR274C ... RCE1 protein processing* prenyl-dependent CAAX protease actiintegral to endoplasmic reticulum m | YMR275C	-0.559527	-0.409931	-1.20875	-0.414801	-0.711927	-0.156207	0	-0.149062	0.0657078	-0.844593	-0.0610788	-0.0681425	0.147125	0	-0.427401	-0.457981	0.0170242	0.0922239	-0.139193	0.403685
YBR078W	YBR078W ... ECM33 cell wall organization and bio molecular function unknown mitochondrion* | YBR079C	-0.825726	-0.477362	-0.423633	-0.501581	-0.559788	0.672021	0	-0.275882	-0.0572433	-0.374491	-0.190923	-0.328661	0.495655	0	-0.306285	-0.642577	0.0776494	0.106257	0.0833144	1.16552
YOR064C	YOR064C ... YNG1 histone acetylation* molecular function unknown histone acetyltransferase complex* | YOR065W	-0.512665	-0.552461	0.910398	0.266542	1.59795	1.94306	0	-0.395608	-1.13822	0.776613	0.42655	1.42544	1.21892	0	-0.815303	-0.584455	-0.100052	-0.417427	1.16191	1.55701
YMR281W	YMR281W ... GPI12 GPI anchor biosynthesis N-acetylglucosaminylphosphatidylinoendoplasmic reticulum membrane | YMR282C	-0.661879	-0.485347	-0.68086	-0.617981	-0.276637	0.13721	0	-0.692984	-0.678791	-0.806083	-0.926184	-0.249995	-0.0038917	0	-0.457431	-0.702511	-0.131649	-0.36205	-0.055302	0.156437
YNL190W	YNL190W ... YNL190W response to dessication molecular function unknown cell wall (sensu Fungi) | YNL191W	-0.56101	-0.36751	-0.504811	-0.712541	-0.161777	0.616615	0	-0.530708	-0.177088	-0.384352	-0.757228	-0.191174	0.442073	0	-0.565573	-0.977967	-0.361693	-0.671333	-0.0651319	0.80583
YPL189W	YPL189W ... GUP2 glycerol transport O-acyltransferase activity membrane | YPL190C	-0.71801	-0.507108	-1.15261	-0.7979	-0.642369	-0.0446157	0	-0.282284	0.244933	-1.89081	-1.22179	-1.02283	-0.433161	0	-1.22359	-0.99088	-0.0941275	-0.16457	-0.51159	0.078958
YJR150C	YJR150C ... DAN1 sterol transport molecular function unknown cell wall (sensu Fungi) | YJR151C	-1.19269	-0.875789	-0.490574	-0.953003	-0.542266	-0.306987	0	-0.899163	-0.279815	-0.779672	-0.955392	-0.54844	0.0942929	0	-0.823993	-1.05106	-0.290475	-0.90452	-0.281268	0.303307
YER073W	YER073W ... ALD5 electron transport* aldehyde dehydrogenase activity mitochondrion | YER074W	-0.362336	0.431668	-0.551698	0.0108064	-0.00440971	0.480356	0	-0.186497	0.445061	-0.705132	0.292316	0.356447	1.10398	0	-0.568503	0.0880569	-0.863194	-0.675472	-0.96743	-0.338704
YNL119W	YNL119W RP cluster NCS2 pseudohyphal growth* molecular function unknown cytoplasm | YNL120C	-0.130195	0.474711	-0.182624	-0.449348	0.708475	1.21376	0	0.0296975	-0.0290086	-0.0975023	-0.533202	0.230031	0.911254	0	-0.570569	-0.146835	-0.729055	-0.757042	-0.428607	0.377481
YML064C	YML064C ... TEM1 signal transduction* protein binding* spindle pole body | YML065W	-0.694212	-0.430065	-0.830684	-0.624131	-0.0855986	0.201204	0	-0.24119	-0.519593	-0.825145	-1.00194	-0.127471	0.312891	0	-0.188149	-0.209416	-0.44492	-0.57374	-0.283123	0.339348
YHR140W	YHR140W ... YHR140W biological process unknown molecular function unknown integral to membrane | YHR141C	0.567709	0.0996152	-0.152612	0.114044	-0.069479	1.0225	0	1.06644	1.19193	0.829081	0.834798	1.57431	3.04055	0	-3.04478	-0.806848	1.36745	1.6614	2.07945	3.04055
YLR003C	YLR003C … PAC cluster CMS1 regulation of DNA replication molecular function unknown | Subunit of U3-containing 90S preribosome processome complex involved in production of 18S rRNA and assembly of small ribosomal subunit; overexpression rescues supressor mutant of mcm10; null mutant is viableYLR004C	-0.53719	-0.168177	-0.687002	0.113317	-0.124133	0.612078	0	0.181815	-0.246052	-0.516452	-0.064867	2.97e-05	0.535284	0	-0.233687	-0.104126	-0.7519	-0.451535	-0.146525	0.709435
YHR045W	YHR045W ... YHR045W biological process unknown molecular function unknown endoplasmic reticulum | YHR046C	-0.718982	-0.22527	-0.999965	-0.495121	-0.106246	0.0821869	0	-0.472532	-0.23086	-1.41985	-0.42758	-0.177225	0.108659	0	-0.865028	-0.689065	-0.327897	-0.298324	-0.522421	-0.16434
YBR202W	YBR202W … MCM7 DNA replication initiation* chromatin binding* cytoplasm* | Component of the hexameric MCM complex, which is important for priming origins of DNA replication in G1 and becomes an active ATP-dependent helicase that promotes DNA melting and elongation when activated by Cdc7p-Dbf4p in S-phaseYBR203W	-0.775786	-0.0441203	-0.68518	-0.496449	-0.320253	0.629691	0	-0.886286	-0.377574	-0.926994	-0.860976	-0.573046	0.269001	0	-0.699352	-0.187408	-0.678417	-0.516888	-0.512895	0.565025
YER120W	YER120W ... SCS2 chromatin silencing at telomer protein binding endoplasmic reticulum* | YER121W	-1.21558	-0.447329	-0.878098	-0.32111	-0.0141404	-0.344344	0	-1.06386	-0.52313	-1.07247	-0.457954	-0.404012	-0.0901006	0	-0.714388	-0.4431	-0.395508	-0.572327	0.25425	0.116001
YPL128C	YPL128C ... TBF1 loss of chromatin silencing DNA binding* nucleus* | YPL129W	-0.962673	-0.675602	-0.959529	-0.638506	-0.835522	-0.282356	0	-0.789033	-0.648019	-0.471557	-0.684937	-0.625129	0.0534917	0	-0.795825	-0.873563	-0.454862	-0.591842	-0.33559	0.486246
YGR006W	YGR006W ... PRP18 nuclear mRNA splicing, via spl protein binding* spliceosome complex | YGR007W	0.0149266	-0.33919	-0.947063	-0.343969	0.0495737	0.68071	0	-0.259486	-0.255292	-0.679066	-0.854678	-0.0420212	0.896635	0	-0.149754	0.179831	-0.725657	-0.792362	-0.415317	0.648814
YHR181W	YHR181W ... SVP26 biological process unknown molecular function unknown endoplasmic reticulum | YHR182C-A	-0.243127	-0.0146257	0.43114	0.187493	0.838599	1.15941	0	-0.234595	-0.0791462	0.0134568	0.0253827	0.340655	0.630685	0	-0.581881	-0.852077	-0.433863	-0.362761	0.177003	0.404798
YDR020C	YDR020C … DAS2 biological process unknown molecular function unknown | Putative protein of unknown function; non-essential gene identified in a screen for mutants with increased levels of rDNA transcription; weak similarity with uridine kinases and with phosphoribokinasesYDR021W	-1.2955	-0.295745	-1.32664	-0.82399	-1.05699	0.0224985	0	-0.507984	-0.643563	-0.916105	-0.426993	-0.446756	0.559394	0	-0.889134	-1.26577	-0.962696	-1.18841	-0.859152	0.1453
YOL101C	YOL101C ... IZH4 lipid metabolism* metal ion binding integral to membrane* | YOL102C	-0.556978	-0.142898	0.0657894	0.274919	0.451108	0.753967	0	-0.271415	-0.239414	0.0765234	0.172441	0.402607	0.799568	0	-0.506802	-0.64641	0.060916	0.12827	0.646918	0.933336
YJL212C	YJL212C ... OPT1 sulfur metabolism oligopeptide transporter activity endoplasmic reticulum* | YJL213W	-1.12285	-0.919876	-0.81998	-0.689522	-0.857739	0.338861	0	-0.511338	-0.0632414	-1.38343	-1.03643	-0.875511	-0.160748	0	-1.32288	-1.62158	-0.0664664	-0.351496	0.0897771	1.01163
YLR110C	YLR110C ... CCW12 cell wall organization and bio molecular function unknown cell wall (sensu Fungi) | YLR111W	-0.621082	-0.196613	0.106027	-0.675649	0.0986214	0.156319	0	-0.598297	-0.389378	-0.983605	-1.47032	-0.0968802	0.369208	0	-1.06866	-1.85949	-0.678972	-1.50356	0.554285	0.863474
YMR243C	YMR243C PAC cluster ZRC1 zinc ion homeostasis* "di-, tri-valent inorganic cation tr"vacuole (sensu Fungi) | YMR244C-A	-0.453511	-0.121971	-0.488483	-0.14121	0.128415	0.770873	0	-0.428418	-0.184432	-0.971279	-0.669606	-0.137816	0.519855	0	-0.821566	-1.0795	-0.339024	-0.545574	0.115682	0.823701
YGL210W	YGL210W ... YPT32 vesicle-mediated transport* GTPase activity Golgi apparatus | YGL211W	-0.167753	0.386548	-0.642611	0.283391	0.547905	0.793328	0	-0.268288	-0.315593	-0.510359	-0.156489	0.173768	0.80763	0	-0.284836	0.135437	-0.583181	-0.690889	0.151397	0.669919
YPR182W	YPR182W ... SMX3 nuclear mRNA splicing, via spl "RNA splicing factor activity, trans"U4/U6 x U5 tri-snRNP complex | YPR183W	-1.35512	-0.758724	-0.606929	-0.75269	-0.192336	-0.601699	0	-1.00493	-0.692597	-0.720185	-1.20053	-0.108091	-0.25233	0	-0.816307	-0.868248	-0.900359	-0.902561	0.332634	0.193894
YLR212C	YLR212C ... TUB4 mitotic spindle organization a structural constituent of cytoskeleouter plaque of spindle pole body* | YLR213C	-1.08897	-0.215302	-1.13178	-0.779814	-0.724738	-0.443764	0	-0.905274	-0.263754	-1.2463	-0.424389	-0.743919	-0.15682	0	-0.99279	-0.628177	-0.485537	-0.71966	-0.410437	0.164446
YBL005W	YBL005W ... PDR3 regulation of transcription fr DNA binding* cytoplasm* | YBL006C	-0.685711	-0.100754	-1.31887	-1.24736	-0.94337	-0.0146545	0	0.35351	0.613653	-0.575861	-0.364302	0.407844	0.957408	0	-1.01441	-0.426686	-0.953463	-0.655073	-0.807211	-0.233829
YNR003C	YNR003C PAC cluster RPC34 transcription from RNA polymer DNA-directed RNA polymerase activitcytoplasm* | YNR004W	-0.827748	-0.0344233	-0.656458	-0.030866	-0.197667	0.341181	0	0.049842	0.0829384	-0.554014	-0.170644	0.0239693	0.58396	0	-0.730403	0.0976482	-0.590112	-0.675218	-0.417709	0.522088
YLR099C	YLR099C ... ICT1 biological process unknown molecular function unknown cellular component unknown | YLR099W-A	-0.504856	-0.0526275	-0.907102	-1.01051	0.26602	0.482558	0	-0.121612	0.135018	-0.511669	-0.780382	0.392279	0.646172	0	-0.934122	-0.928385	-0.815855	-0.852552	-0.420444	-0.0229316
YPL117C	YPL117C ... IDI1 ergosterol biosynthesis isopentenyl-diphosphate delta-isomecytosol | YPL118W	-0.781449	-0.0914331	-0.81646	-0.495175	-0.257535	0.401751	0	-0.566799	-0.359358	-1.03123	-0.539433	-0.211969	0.483656	0	-0.856465	-0.522306	-0.535341	-0.747201	-0.466161	0.380826
YMR265C	YMR265C ... YMR265C biological process unknown molecular function unknown cellular component unknown | YMR266W	0.71596	1.867	-0.366015	-0.634894	1.97367	3.46768	0	0.807545	0.862959	0.583968	-0.325425	1.62493	2.52418	0	-1.91925	-0.976034	-0.632547	-0.0875373	-0.709986	0.624392
YNR028W	YNR028W ... CPR8 biological process unknown peptidyl-prolyl cis-trans isomerasevacuole (sensu Fungi) | YNR029C	-1.05053	-0.569933	-0.532521	-0.237027	-0.165481	-0.255803	0	-0.935784	-0.778327	-0.749862	-0.543054	-0.351281	-0.0786993	0	-0.358512	-0.403883	-0.402916	-0.290443	-0.0432717	0.0726164
YPR144C	YPR144C PAC cluster NOC4 processing of 20S pre-rRNA* snoRNA binding nucleus* | YPR145W	-0.924004	-0.490534	-1.12248	-0.757074	-0.643577	-0.270194	0	-0.321341	-0.66916	-0.873561	-0.816679	-0.258195	0.201357	0	-0.760992	-0.667933	-0.969783	-0.838864	-0.332477	0.25087
YNL327W	YNL327W ... EGT2 cytokinesis cellulase activity cell wall (sensu Fungi) | YNL328C	-1.04317	-1.19592	-0.640699	-1.27126	-0.447235	0.372587	0	-0.647092	-0.058295	-0.838431	-1.9383	-0.452571	-0.452156	0	-0.598116	-0.655337	-0.872819	-0.734127	-0.680513	0.218885
YDL128W	YDL128W ... VCX1 calcium ion homeostasis* calcium ion transporter activity* vacuole (sensu Fungi)* | YDL129W	-0.227198	-0.106275	-0.264909	-0.227847	0.019526	0.23443	0	-1.4291	-0.754437	-1.09959	-0.856757	-0.615428	-0.63356	0	-0.774268	-1.11428	-0.420521	-0.685137	-0.425788	-0.169558
YGL008C	YGL008C PAC cluster PMA1 regulation of pH* "hydrogen-exporting ATPase activity,"plasma membrane* | YGL009C	-0.895144	-0.487253	-0.367612	-0.38199	-0.703482	0.0434315	0	-0.643751	-0.153185	-0.628015	-0.470071	-0.227524	0.410944	0	-0.600463	-0.805541	0.050367	0.000261	0.346203	1.08489
YJR147W	YJR147W ... HMS2 pseudohyphal growth molecular function unknown cytoplasm* | YJR148W	-0.159203	0.124441	0.157491	-0.0322681	0.453488	1.1411	0	-0.691739	-0.125428	-0.799787	-0.597593	-0.171927	0.461486	0	-0.540742	-0.666385	-0.340367	-0.492504	0.272224	1.03512
YGR082W	YGR082W ... TOM20 mitochondrial matrix protein i protein transporter activity mitochondrial outer membrane transl | YGR083C	-0.971541	-0.324095	-0.891451	-0.39552	0.137679	0.0978318	0	-1.20883	-0.618988	-1.18815	-0.652928	0.125882	0.266458	0	-0.494092	-0.384905	-0.246973	-0.515267	0.17686	0.216219
YHR042W	YHR042W PAC cluster NCP1 ergosterol biosynthesis electron transporter activity mitochondrion* | YHR043C	-0.882469	-0.57896	-0.902325	-1.26042	-0.528148	-0.091382	0	-0.82034	-0.348506	-0.997962	-1.63022	-0.787627	-0.385738	0	-1.28108	-1.42202	-0.0438792	-0.0617568	-0.335355	0.222651
YMR038C	YMR038C ... CCS1 intracellular copper ion trans superoxide dismutase copper chaperocytosol* | YMR039C	-0.407935	-0.15443	-0.178558	0.0144684	0.241437	0.615468	0	-0.0486024	-0.244306	-0.329932	-0.606619	-0.0273358	0.53126	0	-0.152708	-0.237752	-0.538254	-0.502142	-0.37132	0.402712
YOR025W	YOR025W ... HST3 chromatin silencing at telomer DNA binding nucleus | YOR026W	-0.677548	-0.52719	-0.883677	-0.512349	-0.344055	0.571019	0	-0.495776	-0.606832	-0.946839	-0.594481	0.0838886	0.919355	0	-0.22581	-0.178067	-0.32488	-0.0472431	-0.0125129	1.05919
YMR202W	YMR202W ... ERG2 ergosterol biosynthesis C-8 sterol isomerase activity endoplasmic reticulum | YMR203W	-1.09046	-1.16295	-1.42536	-1.44108	-0.525987	-0.459119	0	-0.508197	-0.259726	-1.64139	-1.40602	-0.510651	-0.176439	0	-1.43269	-1.88247	-0.813664	-0.838692	-0.771675	-0.392495
YDR339C	YDR339C … PAC cluster FCF1 biological process unknown molecular function unknown | Putative PINc domain nuclease required for early cleavages of 35S pre-rRNA and maturation of 18S rRNA; component of the SSU (small subunit) processome involved in 40S ribosomal subunit biogenesis; copurifies with Faf1pYDR340W	-0.811373	-0.209317	-0.658162	-0.238199	-0.145179	0.376727	0	-0.743362	-0.255037	-1.01405	-0.403024	-0.430311	0.527169	0	-0.616511	0.000507	-0.575214	-0.826819	-0.233291	0.890196
YNL141W	YNL141W PAC cluster AAH1 adenine catabolism adenine deaminase activity cytoplasm* | YNL142W	-0.653531	-0.218561	-0.542412	-0.251127	-0.539763	0.146108	0	-0.237929	-0.158261	-0.544137	-0.264643	-0.659278	0.220067	0	-1.27295	-1.16399	-1.27375	-1.03808	-0.160932	0.543827
YML102W	YML102W ... CAC2 DNA repair* transcription regulator activity chromatin assembly complex* | YML103C	-0.130833	-0.0424809	-0.905725	-0.549858	-0.440042	-0.550491	0	-0.714216	-0.46351	-1.30818	-0.970754	-0.742319	-0.476898	0	-1.16248	-1.01977	-0.86237	-0.757389	-0.639039	-0.644711
YGL225W	YGL225W PAC cluster VRG4 N-linked glycosylation* nucleotide-sugar transporter activimitochondrion* | YGL226C-A	-0.319996	-0.309447	-0.418196	-0.313138	-0.339215	0.367947	0	-0.13324	-0.266004	-0.960631	-0.672778	-0.721852	-0.14628	0	-0.359032	-1.10608	-0.363885	-0.353257	-0.169766	0.465919
YKL144C	YKL144C PAC cluster RPC25 transcription from RNA polymer DNA-directed RNA polymerase activitDNA-directed RNA polymerase III com | YKL145W	-0.929103	-0.430367	-0.473673	0.190665	-0.0954742	0.348485	0	-0.544954	-0.545998	-0.397653	-0.0113964	0.0482367	0.476436	0	-0.839594	-0.852095	-0.426097	-0.534996	0.02698	0.670678
YPL145C	YPL145C ... KES1 vesicle-mediated transport* oxysterol binding cytoplasm* | YPL146C	-0.401868	-0.0464442	-0.3816	-0.142058	-0.224061	0.591769	0	-0.161446	-0.113395	-0.492097	-0.212435	0.0862216	0.493697	0	-0.605363	-0.828348	-0.703537	-0.609324	-0.699098	0.0431299
YOR171C	YOR171C ... LCB4 sphingolipid metabolism* D-erythro-sphingosine kinase activiendoplasmic reticulum* | YOR172W	0.44405	0.646907	0.0277299	0.0875716	1.81023	2.52885	0	0.701159	0.257349	0.832996	0.459776	2.03199	2.12143	0	-0.424198	-0.181553	0.421319	0.224337	1.60552	1.82898
YLR438C-A	YLR438C-A ... LSM3 nuclear mRNA splicing, via spl RNA binding nucleolus* | YLR438W	-0.621517	-0.561478	-0.883151	-0.175463	-0.371369	-0.0228255	0	-0.267898	-0.157224	-1.3165	-0.417968	-0.541172	-0.0658479	0	-0.383586	-0.76368	-1.33138	-0.476103	-0.890599	-0.311502
YPL112C	YPL112C ... PEX25 peroxisome organization and bi molecular function unknown peroxisomal membrane | YPL113C	-0.265818	0.0756966	-0.363704	0.175905	0.574065	1.05231	0	-0.282178	-0.175911	-0.741093	0.132184	0.183612	0.804157	0	-0.445841	-0.219192	-0.384455	-0.719114	-0.1512	0.541733
YEL066W	YEL066W ... HPA3 histone acetylation histone acetyltransferase activity cytoplasm* | YEL067C	-0.81395	-0.322034	-0.555665	-0.52889	0.0626476	-0.00930355	0	-0.934844	-0.374785	-0.944084	-0.883872	-0.505338	-0.0758139	0	-0.346227	0.0501092	-1.01538	-0.945007	-0.705029	-0.434417
YJL025W	YJL025W ... RRN7 transcription from RNA polymer RNA polymerase I transcription factRNA polymerase I transcription fact | YJL026W	-0.0864	0.37486	-0.688956	-0.549141	-0.069479	0.769212	0	0.264316	0.171596	-0.340481	-0.570589	0.386414	1.3628	0	-0.527726	-0.495727	-0.416819	-0.924442	0.0936613	1.13883
YML018C	YML018C PAC cluster YML018C biological process unknown molecular function unknown vacuolar membrane (sensu Fungi) | YML019W	-0.571257	-0.222036	-0.118779	-0.0368575	0.177614	0.977829	0	-0.315902	0.0100314	-0.318694	-0.300515	0.10969	0.676213	0	-0.486115	-0.691243	-0.591494	-0.48302	-0.0899822	0.804146
YHR070W	YHR070W ... TRM5 tRNA methylation tRNA (guanine) methyltransferase accytoplasm* | YHR071C-A	-0.702078	-0.339368	-0.773092	-0.67824	-0.416085	0.0116102	0	-0.527591	-0.513113	-0.856355	-0.865331	-0.119805	0.346027	0	-0.765852	-0.939684	-0.811023	-0.739535	-0.230748	0.203585
YNL058C	YNL058C ... YNL058C biological process unknown molecular function unknown vacuole (sensu Fungi) | YNL059C	-0.499709	0.165503	0.22808	-0.0983866	2.34233	3.80386	0	0.0387825	0.345276	-0.476728	-0.680403	0.936876	1.93316	0	-0.0153407	0.516428	0.0765945	-0.135992	1.13007	2.98585
YDR124W	YDR124W ... YDR124W biological process unknown molecular function unknown cellular component unknown | YDR125C	0.183565	0.415117	1.25233	1.42688	1.70531	2.82985	0	-1.39299	-1.24465	1.93664	1.03072	1.04463	1.81177	0	-0.012363	0.123364	-0.262598	0.448516	0.860807	2.08842
YMR016C	YMR016C ... SOK2 pseudohyphal growth transcription factor activity nucleus | YMR017W	-0.904813	-0.512459	-1.55519	-1.13355	-0.725033	0.377263	0	-0.608574	-0.686706	-1.97925	-1.1912	-0.55802	0.224742	0	-0.816574	-0.952046	-1.38841	-1.40151	-1.1183	0.0395017
YLR099W-A	YLR099W-A ... YLR099W-A biological process unknown molecular function unknown cellular component unknown | YLR100W	-0.287626	-0.219562	-0.244015	-0.779235	0.345559	-0.775009	0	-0.471739	-0.347642	-1.23195	-1.52164	-0.182838	-1.10466	0	-0.636504	-1.67536	-1.33994	-1.1331	-0.272854	-0.862939
YPL163C	YPL163C ... SVS1 response to chemical substance molecular function unknown cell wall (sensu Fungi)* | YPL164C	-0.57946	-0.30118	-0.418188	-0.308781	0.249471	0.459247	0	-0.417704	-0.231725	-1.63978	-0.307165	-0.546875	0.0868703	0	-0.911248	-1.05196	-0.900875	-1.11493	-0.841767	-0.305113
YMR108W	YMR108W ... ILV2 branched chain family amino ac acetolactate synthase activity* mitochondrion* | YMR109W	-0.170582	0.323172	-0.507628	0.260345	-0.316533	0.558617	0	0.00805934	0.236161	-0.690853	0.262155	0.376059	1.11468	0	-0.00101347	-0.0426499	-0.60843	-0.587756	-0.598389	0.269134
YNL307C	YNL307C ... MCK1 protein amino acid phosphoryla glycogen synthase kinase 3 activitysoluble fraction | YNL308C	-0.731337	-0.194655	-0.38059	-0.0427274	-0.360167	0.206815	0	-0.522636	-0.186917	-0.45269	0.0544151	-0.109603	0.278189	0	-0.475532	-0.6474	0.00321947	-0.106927	0.178668	0.611453
YLR444C	YLR444C ... | YLR445W	-1.82461	0.322008	-1.23109	0.914424	1.63559	1.60746	0	0.403479	1.22167	-0.249396	0.872217	1.63559	2.02627	0	-1.20625	-0.0824717	0	-1.93054	2.40138	0.078958
YKL096W	YKL096W ... CWP1 cell wall organization and bio structural constituent of cell wallcell wall (sensu Fungi) | YKL096W-A	0.215548	1.38957	1.30229	-0.506108	1.56757	2.09525	0	-0.253037	-0.040797	0.695614	-2.84675	0.0516273	0.416217	0	0.109544	-0.331336	1.12418	1.11233	2.55423	3.11781
YPR200C	YPR200C ... ARR2 response to arsenic arsenate reductase activity cellular component unknown | YPR201W	0.175391	0.5444	0.623613	0	1.88988	2.4246	0	0.20554	-0.0413615	-1.00099	0	1.77361	2.17311	0	-2.00826	-0.84749	0.623613	-2.30575	1.66441	2.2258
YNL080C	YNL080C … EOS1 biological process unknown molecular function unknown | Protein involved in N-glycosylation; deletion mutation confers sensitivity to exidative stress and shows synthetic lethality with mutations in the spindle checkpoint genes BUB3 and MAD1; YNL080C is not an essential geneYNL081C	-0.707313	-0.422673	-0.70554	-0.312715	-0.157154	0.246023	0	-0.656437	-0.0716861	-0.566746	-0.177529	-0.0661521	0.360826	0	-0.512452	-0.590238	-0.155988	-0.328336	0.294041	0.653312
YGL083W	YGL083W ... SCY1 biological process unknown molecular function unknown clathrin-coated vesicle | YGL084C	-0.514718	0.0346922	-0.585635	-0.410761	-0.0558685	0.441853	0	-0.313646	-0.442985	-0.546912	-0.32826	0.025356	0.352146	0	-0.291642	-0.0374871	-0.313175	-0.216218	-0.144465	0.558018
YHR205W	YHR205W ... SCH9 protein amino acid phosphoryla protein serine/threonine kinase actcytoplasm* | YHR206W	-0.651743	0.0740281	-0.56321	-0.579271	-0.754107	0.0909642	0	-0.638341	-0.302008	-0.675957	-0.61446	-0.601446	0.167824	0	-0.938395	-0.676734	-0.71194	-0.695818	-0.786688	0.225319
YDR414C	YDR414C ... ERD1 protein-ER retention molecular function unknown membrane | YDR415C	-0.569063	-0.211503	-0.124241	-0.137619	0.543972	0.77395	0	-0.427545	-0.483156	-0.266728	-0.263112	0.21701	0.566425	0	-0.593915	-0.964015	-0.102551	-0.0891359	0.333204	0.549178
YGL125W	YGL125W ... MET13 methionine metabolism* structural constituent of ribosome*cytoplasm* | YGL126W	-0.403417	-0.397364	0.166519	-0.68771	0.394973	0.707679	0	-0.644961	0.284274	0.065564	-0.5474	0.202801	0.801318	0	-0.39984	-0.235521	-0.0581028	-0.107945	-1.25837	-0.344386
YHL042W	YHL042W ... YHL042W biological process unknown molecular function unknown cellular component unknown | YHL043W	-0.620926	-0.324355	0.0892382	-0.735389	0.510618	0.645131	0	-0.149315	0.0674063	-0.106138	-0.960962	-0.300164	0.406542	0	-1.27915	-1.11373	-0.523823	-0.254703	-1.64302	-0.898322
YOR359W	YOR359W ... VTS1 protein-vacuolar targeting RNA binding* cytosol | YOR360C	-0.563536	-0.393961	-1.29264	-0.854732	-0.459685	0.217047	0	-0.378616	-0.484144	-1.335	-1.13998	-0.242473	0.315315	0	-0.66748	-1.13233	-0.632547	-0.87803	-0.33559	0.347063
YBR187W	YBR187W … GDT1 biological process unknown molecular function unknown | Putative protein of unknown function; expression is reduced in a gcr1 null mutant; GFP-fusion protein localizes to the vacuole; expression pattern and physical interactions suggest a possible role in ribosome biogenesisYBR188C	-0.611296	-0.419577	-0.635423	-0.318263	-0.316834	-0.179674	0	-0.201534	-0.100974	-0.996383	-0.343887	-0.311205	-0.04367	0	-0.278079	-0.683362	-0.425635	-0.807503	0.0404282	0.154216
YHR149C	YHR149C ... SKG6 biological process unknown molecular function unknown bud neck* | YHR150W	-0.834805	-0.377911	-1.55322	-0.381535	-0.649028	0.154781	0	-0.544634	-0.396429	-0.882731	-0.0453754	-0.606508	0.132161	0	-1.36671	-1.22467	-1.0843	-0.815368	-0.902586	0.121324
YDL063C	YDL063C PAC cluster YDL063C biological process unknown molecular function unknown cytoplasm* | YDL064W	-0.116212	0.366207	-1.14138	-0.199805	-0.865008	0.468384	0	0.425315	0.272962	-0.825736	-0.154104	-0.123827	0.823962	0	-0.344103	-0.491346	-1.10273	-0.501956	-0.461661	0.73837
YLR432W	YLR432W PAC cluster IMD3 GTP biosynthesis IMP dehydrogenase activity cytoplasm | YLR433C	-0.714014	0.039984	-1.01247	-0.804799	-0.58722	0.478623	0	0.153283	0.25119	-0.834175	-0.242226	0.151114	1.14421	0	-0.494437	-0.541046	-0.252247	-0.581052	-0.0321748	0.829961
YGR191W	YGR191W ... HIP1 manganese ion transport* L-histidine transporter activity plasma membrane | YGR192C	-0.494119	-0.112664	0.504593	0.132603	0.352161	0.711622	0	-0.637163	-0.232525	-0.0338091	-0.397166	0.0702286	0.519636	0	-0.67999	-0.740512	-0.0454236	-0.0853375	0.00773394	0.335442
YCL002C	YCL002C ... YCL002C biological process unknown molecular function unknown cellular component unknown | YCL004W	-0.134949	0.274959	0.0502906	0.214937	0.43556	0.467109	0	-0.00639687	0.145873	0.171708	0.0775738	0.25669	0.380278	0	-0.59905	-1.01501	-0.373689	-0.66105	0.368168	0.478978
YNL207W	YNL207W ... RIO2 processing of 20S pre-rRNA protein kinase activity* cytoplasm* | YNL208W	-0.101318	0.162012	-0.36971	-0.0115365	-0.165057	0.552299	0	0.0640542	0.0540234	-0.0144566	0.0890134	-0.00696253	0.594122	0	-0.699456	-0.465916	-0.717639	-0.391248	-0.247112	0.582822
YDL070W	YDL070W ... BDF2 biological process unknown molecular function unknown nucleus | YDL071C	-0.343782	0.095534	-0.722192	-0.298651	-0.634264	-0.557833	0	-0.897834	-0.829631	-0.392123	-0.125875	-0.621245	-0.0895936	0	-0.474633	-0.261131	-0.181097	0.0379276	0.476595	0.711077
YBL011W	YBL011W ... SCT1 phospholipid biosynthesis glycerol-3-phosphate O-acyltransferendoplasmic reticulum | YBL012C	-0.564291	-0.064175	-0.241018	-0.025639	0.0264733	0.667464	0	-0.679267	-0.539699	-0.287777	-0.0423103	0.250337	0.72671	0	-0.168124	-0.18094	0.151914	0.135293	0.300189	0.838462
YDR352W	YDR352W ... YDR352W biological process unknown molecular function unknown vacuolar membrane (sensu Fungi) | YDR353W	-0.532039	0.115177	-0.150143	0.0583344	0.3122	0.816823	0	-0.79263	-0.00566877	-0.225035	-0.0428051	0.203468	0.39778	0	-0.823876	-0.194964	0.0935074	-0.0313177	0.523054	0.95251
YPR016C	YPR016C PAC cluster TIF6 ribosomal large subunit biogen molecular function unknown cytoplasm* | YPR016W-A	-0.877851	-0.303498	-0.501979	-0.308729	-0.10504	0.0850228	0	-0.610267	-0.123283	-0.864713	-0.539197	-0.260703	0.240934	0	-0.852914	-0.800431	-0.508544	-0.810494	0.324599	0.554819
YDR404C	YDR404C ... RPB7 transcription from RNA polymer DNA-directed RNA polymerase activit"DNA-directed RNA polymerase II, cor" | YDR405W	-0.992826	-0.661236	-0.50601	0.0258356	-0.279839	-0.030413	0	-0.58674	-0.301317	-0.546428	-0.15559	-0.254964	0.145125	0	-0.75949	-0.956325	-0.106002	-0.218221	0.382402	0.681135
YOL014W	YOL014W ... YOL014W biological process unknown molecular function unknown cellular component unknown | YOL015W	-0.164264	0.31679	-0.267416	-0.266065	-0.522652	0.117546	0	-0.0904485	0.24309	0.674383	0.0295979	0.0627162	0.803016	0	0.217328	0.304617	-0.590112	-1.30367	-0.171096	0.329876
YLR328W	YLR328W ... NMA1 NAD metabolism nicotinamide-nucleotide adenylyltracytoplasm* | YLR329W	-0.559048	7.95e-05	-1.12799	-0.565806	-0.763302	-0.0485512	0	-0.798829	-0.541543	-1.32942	-0.817073	-0.553294	0.0328579	0	-1.12804	-1.14374	-1.35447	-1.27172	-0.681295	-0.188706
YOR222W	YOR222W ... ODC2 mitochondrial transport intracellular transporter activity*mitochondrial inner membrane | YOR223W	-0.431598	0.122699	0.0844275	0.825932	0.285073	0.259434	0	0.119897	0.233111	-0.338546	1.14805	0.330103	0.883898	0	-0.26475	-0.1185	-0.843535	-0.505989	-0.67281	-0.53442
YGL209W	YGL209W ... MIG2 regulation of transcription fr specific RNA polymerase II transcrinucleus | YGL210W	-0.557325	-0.0193147	-1.58995	-1.41022	0.162905	0.128208	0	-0.260196	0.00781712	-1.28363	-0.865274	-0.0609118	0.0623742	0	-0.507411	-0.236226	-1.25676	-1.07694	-0.954747	-0.444077
YER001W	YER001W ... MNN1 O-linked glycosylation* "alpha-1,3-mannosyltransferase activ"Golgi apparatus | YER002W	-0.0671129	0.0604446	-0.637333	0.150307	1.07549	2.19242	0	0.494531	-0.0361135	-0.592389	0.444467	1.15604	1.66552	0	0.0961327	-0.42191	0.0730173	0.31906	1.0746	1.69965
YPL068C	YPL068C ... YPL068C biological process unknown molecular function unknown nucleus | YPL069C	0.243676	0.809673	-0.808657	-0.823619	0.156525	1.39987	0	0.158003	0.162219	-0.783896	-1.0371	0.243916	1.05571	0	-0.355714	-0.113664	-1.67002	-1.38815	-0.596938	0.736433
YBR038W	YBR038W ... CHS2 cytokinesis chitin synthase activity bud neck | YBR039W	-1.14089	-0.775405	-0.819836	-1.10324	-0.821701	-0.295187	0	-1.34639	-0.446377	-1.14897	-1.04654	-0.294326	0.197034	0	-0.366294	-0.197578	-0.119677	-0.239979	-0.336539	0.195016
YML080W	YML080W PAC cluster DUS1 tRNA modification tRNA dihydrouridine synthase activinucleus | YML081C-A	-0.102143	-0.033473	-0.580588	-0.0452064	-0.406514	0.502665	0	-0.322839	-0.432436	-0.145384	-0.0297651	-0.409753	0.425136	0	-0.440713	-0.499922	-0.948049	-0.45356	-0.532822	0.552522
YHR041C	YHR041C ... SRB2 transcription from RNA polymer RNA polymerase II transcription medmediator complex | YHR042W	-0.333598	-0.431286	-0.292284	-1.00554	0.26193	-0.659326	0	-0.278135	-0.333123	-1.28022	-1.39536	0.429916	0.0814118	0	-1.03221	-1.70283	-0.260719	-0.438281	0.285898	-0.558472
YIL064W	YIL064W … SEE1 biological process unknown S-adenosylmethionine-dependent | Protein with a role in intracellular transport; has sequence similarity to S-adenosylmethionine-dependent methyltransferases of the seven beta-strand familyYIL065C	-0.290527	0.517453	-0.556422	0.168492	0.052022	0.612262	0	0.102819	0.378367	-0.219635	-0.405039	-0.274899	0.415837	0	-1.22726	-0.721585	-1.02522	-0.813972	-0.455097	0.389298
YEL046C	YEL046C ... GLY1 threonine catabolism* threonine aldolase activity cytosol | YEL047C	-0.918174	-0.657979	-0.253821	-0.379304	-0.56746	-0.167654	0	-0.95858	-0.489113	-0.266269	-0.744312	-0.4394	-0.027621	0	-1.07337	-1.33497	-0.862868	-0.757812	-0.545881	-0.149268
YMR138W	YMR138W ... CIN4 microtubule-based process GTP binding cytoplasm | YMR139W	-0.335862	-0.0364463	-0.548284	-0.724356	-0.132215	0.291685	0	0.149722	0.055864	-0.210448	-0.626632	0.0197166	1.00765	0	-0.998981	-0.395422	-0.672076	-1.38757	-0.61716	0.600911
YDR297W	YDR297W ... SUR2 sphingolipid biosynthesis* sphingosine hydroxylase activity endoplasmic reticulum | YDR298C	-0.80249	-0.432396	-0.59083	-0.505044	-0.277815	0.100915	0	-0.515961	-0.0956002	-0.920955	-0.446905	-0.18459	0.0515985	0	-0.862306	-0.949477	-0.155618	-0.384712	0.112957	0.352112
YIL056W	YIL056W … VHR1 biological process unknown molecular function unknown | Transcriptional activator, required for the vitamin H-responsive element (VHRE) mediated induction of VHT1 (Vitamin H transporter) and BIO5 (biotin biosynthesis intermediate transporter) in response to low biotin concentrationsYIL057C	-0.0125586	0.437775	-0.318352	-0.612424	0.27211	0.914536	0	0.574336	0.750116	-0.040595	-0.592279	0.375219	0.734169	0	-0.557975	-0.626497	-0.510275	-0.834454	-0.748297	0.080901
YOR264W	YOR264W ... DSE3 biological process unknown molecular function unknown bud neck | YOR265W	-1.18343	-0.521086	-0.866629	-0.777201	-0.29865	0.397866	0	-0.678421	0.188853	-1.04704	-1.38551	-0.449942	0.20524	0	-0.617853	0.190079	-1.13316	-0.811646	-0.329591	0.500785
YOR145C	YOR145C PAC cluster PNO1 rRNA processing* unfolded protein binding nucleus* | YOR146W	-0.530139	0.00742151	-0.465834	0.231713	-0.124123	0.130233	0	-0.211354	-0.152723	-0.376658	-0.0315729	-0.368129	0.214247	0	-0.846239	-0.596281	-0.964489	-0.765908	-0.274757	0.251748
YKL201C	YKL201C ... MNN4 response to stress* molecular function unknown membrane | YKL202W	-0.549463	-0.261967	-0.761157	-1.06954	-0.510733	0.170654	0	0.014199	-0.0612611	-0.779465	-0.966353	-0.461663	-0.268551	0	-1.44061	-1.30667	-0.885956	-0.436852	-1.02783	-0.100605
YDL090C	YDL090C ... RAM1 protein amino acid farnesylati protein farnesyltransferase activitprotein farnesyltransferase complex | YDL091C	0.190988	0.283119	-0.739416	-0.0577677	0.0967704	0.666355	0	0.208699	0.186159	-0.211982	-0.0692773	0.621256	1.28051	0	-0.731845	-0.487993	-0.560757	-0.43066	0.185576	0.760782
YBR096W	YBR096W ... YBR096W biological process unknown molecular function unknown endoplasmic reticulum | YBR097W	-0.576221	-0.627807	-0.786867	-0.315107	-0.291414	0.211887	0	-0.341605	-0.353293	-0.693117	-0.670974	-0.427524	-0.208705	0	-0.363074	-0.746423	-0.477529	-0.04923	-0.533207	-0.112449
YGR281W	YGR281W ... YOR1 transport* xenobiotic-transporting ATPase actiplasma membrane | YGR282C	-1.19256	-0.178987	-1.1174	-0.663545	-0.228264	0.365004	0	-0.310095	-0.0774607	-1.09952	-0.494537	0.190871	0.55298	0	-0.535638	-0.288403	-0.897943	-0.747795	-0.807088	-0.303461
YCR034W	YCR034W PAC cluster FEN1 vesicle-mediated transport* fatty acid elongase activity endoplasmic reticulum* | YCR035C	0.0510359	0.190473	0.0173133	0.0156555	0.334728	1.22418	0	-0.25839	-0.205728	-0.934345	-0.517148	-0.0689426	0.724799	0	-0.207494	-0.65005	-0.58104	-0.661396	-0.335378	0.589554
YHR072W	YHR072W ... ERG7 ergosterol biosynthesis lanosterol synthase activity endoplasmic reticulum* | YHR072W-A	-0.651708	-0.293747	-0.865486	-0.611562	-0.771024	-0.397631	0	-0.541644	-0.0805249	-0.47451	-0.448449	-0.48639	0.0216879	0	-1.33286	-1.32191	-0.581148	-0.267861	-0.574947	-0.16108
YFR034C	YFR034C ... PHO4 phosphate metabolism* transcription factor activity cytoplasm* | YFR035C	-0.515281	-0.779872	-0.525829	-0.784272	-0.554906	-0.553694	0	-0.651934	-0.787726	-0.463966	-0.88162	-0.511351	-0.400544	0	-1.27556	-1.50473	-0.912655	-1.28582	-0.975835	-0.755032
YNL147W	YNL147W ... LSM7 nuclear mRNA splicing, via spl RNA binding nucleolus* | YNL148C	-0.812536	-0.182785	-0.83513	-0.476927	-0.646727	0.224132	0	-0.926554	-0.933605	-0.993615	-0.658585	-0.695708	0.190842	0	-0.730149	-1.03191	-0.369513	-0.514532	-0.18746	0.699544
YIR012W	YIR012W PAC cluster SQT1 ribosomal large subunit assemb molecular function unknown cytoplasm* | YIR013C	-0.689941	-0.146057	-0.622097	-0.098737	-0.254135	0.218896	0	-0.360834	-0.105182	-0.633485	-0.286468	-0.164739	0.39986	0	-0.653777	-0.556183	-0.662921	-0.473075	-0.150327	0.273715
YER010C	YER010C ... YER010C biological process unknown molecular function unknown cellular component unknown | YER011W	-0.61769	-0.348325	0.318267	0.320275	0.676654	0.718969	0	-0.243699	-0.0619667	0.167277	0.207144	0.303202	0.750297	0	-0.161824	-0.408663	0.00355395	0.295456	0.729956	0.882628
YIL145C	YIL145C ... PAN6 pantothenate biosynthesis pantoate-beta-alanine ligase activicytoplasm* | YIL146C	-0.619177	-0.230913	-0.202847	-0.347528	-0.0594564	0.101304	0	-0.362169	-0.341282	-0.221154	-0.428681	-0.123343	0.0553227	0	-1.11526	-1.12749	-0.578902	-0.537908	-0.431459	0.0227031
YLR064W	YLR064W ... YLR064W biological process unknown molecular function unknown endoplasmic reticulum | YLR065C	-0.23116	-0.0658707	-0.140228	0.171659	0.414291	0.892312	0	-0.198608	0.189562	-0.3003	-0.116059	0.296956	0.766345	0	-0.565247	-0.758485	-0.27136	-0.280657	-0.0306566	0.528046
YDR233C	YDR233C PAC cluster RTN1 biological process unknown molecular function unknown mitochondrion* | YDR234W	-0.568885	-0.200899	-0.365544	-0.290568	-0.0625622	0.448855	0	-0.158143	0.0406374	-0.34056	-0.0800755	0.146578	0.598892	0	-0.582014	-0.833748	-0.329493	-0.34792	0.0855359	0.711907
YIL116W	YIL116W ... HIS5 histidine biosynthesis histidinol-phosphate transaminase aintracellular | YIL117C	-0.0924326	0.477641	0.0921673	-0.0117029	0.690433	0.54606	0	0.236436	0.45598	-0.388412	-0.143686	0.507574	0.722219	0	-0.704182	-0.480817	-0.896948	-0.866489	-0.498305	-0.333653
YNR017W	YNR017W … TIM23 (MAS6) protein catabolism* proteasome activator activity nucleus* | Essential protein of the mitochondrial inner membrane, component of the mitochondrial import systemYNR018W	-0.418903	-0.0551978	-0.648592	-0.530098	-0.407224	-0.240166	0	-0.771771	-0.560422	-0.308893	-0.644533	-0.0578629	0.276626	0	-0.672126	-0.910801	-0.0196609	-0.238443	-0.401492	-0.0626152
YIR026C	YIR026C PAC cluster YVH1 sporulation (sensu Fungi)* protein tyrosine phosphatase activicytoplasm | YIR027C	-0.376497	0.2657	-0.746874	0.163561	0.0970602	-0.10953	0	-0.181484	-0.100748	-0.438681	0.0470893	-0.0920453	0.304764	0	-0.5659	-0.449464	-0.943562	-0.737227	0.0424532	0.153781
YNL197C	YNL197C ... WHI3 regulation of cell size RNA binding cytoplasm | YNL198C	-0.530142	-0.13959	-0.747289	-0.769511	-0.843475	0.101725	0	-0.607153	-0.512358	-0.88796	-0.866907	-0.501155	-0.0505323	0	-0.413542	-0.638487	-0.415497	-0.593712	-0.568331	0.321627
YHR032W	YHR032W ... YHR032W biological process unknown molecular function unknown cellular component unknown | YHR032W-A	0.0133867	0.194167	-0.0805341	0.13476	0.31977	0.509637	0	0.114803	0.205424	-0.664945	-0.459726	0.438064	0.596504	0	-0.556868	-0.713558	0.206553	-0.15943	0.474467	0.722654
YLL051C	YLL051C ... FRE6 biological process unknown ferric-chelate reductase activity vacuole (sensu Fungi) | YLL052C	-0.0855599	0.147978	0.0530633	-0.633011	0.00754344	0.659928	0	0.216778	0.400591	-0.0483001	-0.43567	0.0306312	0.56469	0	-0.659234	-0.595427	-0.67186	-0.755923	-0.0368056	0.445974
YEL032W	YEL032W ... MCM3 DNA replication initiation* chromatin binding* cytoplasm* | YEL033W	-0.371823	0.0548335	-0.286609	-0.267385	-0.0976372	0.582912	0	-0.568917	-0.352406	-0.409253	-0.90169	-0.477999	-0.0759463	0	-0.61823	-0.264182	-0.251599	-0.182854	-0.608935	-0.0190279
YLR372W	YLR372W PAC cluster SUR4 sphingolipid biosynthesis* fatty acid elongase activity endoplasmic reticulum* | YLR373C	-0.498255	-0.00556414	-0.0526167	0.272985	0.473646	1.24735	0	-0.244399	0.0117435	-0.868153	-0.0711454	0.207841	0.79128	0	-0.34329	-0.589619	-0.279196	-0.373821	0.216971	0.879923
YEL073C	YEL073C ... YEL073C biological process unknown molecular function unknown cellular component unknown | YEL074W	-1.08764	-0.910653	0	0	3.16209	3.30301	0	1.75712	2.22605	-0.346072	0	1.88243	2.06653	0	-1.12725	-1.23215	0	-2.02721	1.33818	1.66392
YBR105C	YBR105C ... VID24 vesicle-mediated transport* molecular function unknown extrinsic to membrane* | YBR106W	1.11156	1.58906	0.497597	0.501644	2.29867	2.32391	0	0.386056	0.82659	0.324011	-0.145566	1.50559	1.64755	0	-0.621776	-0.368392	-0.604582	-0.32951	0.260513	0.470467
YOR381W	YOR381W ... FRE3 iron ion homeostasis* ferric-chelate reductase activity plasma membrane* | YOR381W-A	0.136221	0.84557	0.875294	0.227893	2.47396	2.97003	0	-0.147536	0.335564	0.753893	0.0949211	2.37727	2.54684	0	-0.027711	-0.0546345	0.0816981	0.207775	1.55828	2.24888
YER049W	YER049W … PAC cluster TPA1 biological process unknown molecular function unknown | Protein of unknown function; interacts with Sup45p (eRF1), Sup35p (eRF3) and Pab1p; has a role in translation termination efficiency, mRNA poly(A) tail length and mRNA stabilityYER050C	-0.455992	-0.0430181	-0.715667	0.0336328	-0.452127	0.38408	0	-0.156822	-0.214234	-0.4668	0.000937	-0.0806903	0.488126	0	-0.550637	-0.590192	-0.205587	-0.125049	0.022807	0.663327
YLR022C	YLR022C ... SDO1 35S primary transcript process molecular function unknown cytoplasm* | YLR023C	-0.864901	-0.0711373	-0.727873	0.180841	-0.391407	0.58486	0	-0.115759	-0.103568	-1.05104	-0.400118	-0.190924	0.800135	0	-0.396046	-0.109466	-0.564502	-0.680194	-0.0853343	0.921129
YBR263W	YBR263W ... SHM1 one-carbon compound metabolism glycine hydroxymethyltransferase acmitochondrion | YBR264C	-0.440168	0.157722	-0.278425	0.0982212	-0.0660513	0.455763	0	-0.409964	-0.114647	-0.531904	-0.105885	-0.256227	0.41111	0	-0.464153	-0.525583	-0.30141	-0.213068	0.196086	0.66172
YDL220C	YDL220C ... CDC13 telomere maintenance* single-stranded DNA binding nuclear telomere cap complex | YDL221W	-0.600696	-0.13145	-0.727226	-0.63993	-0.727904	-0.184332	0	-0.70139	-0.618988	-0.220871	-0.405296	-0.487243	0.0796197	0	-0.572345	-0.572532	-0.465142	-0.328127	-0.805863	-0.0940583
YIR011C	YIR011C ... STS1 ubiquitin-dependent protein ca molecular function unknown nucleus | YIR012W	-0.380659	0.245877	-0.0218573	0.120313	0.300067	0.551659	0	-0.493226	-0.0983304	-0.178993	-0.150162	-0.185431	0.268631	0	-0.53372	-0.0130395	-0.715388	-0.493485	-0.532391	0.0906398
YBL081W	YBL081W ... YBL081W biological process unknown molecular function unknown cellular component unknown | YBL082C	-0.239646	-0.0133133	0.784916	-0.170479	-0.097433	0.403886	0	-0.349258	-0.134082	0.133307	-0.81265	-0.329512	0.149721	0	-0.411295	-0.578543	-0.749785	-0.769608	-0.822453	-0.0883709
YGR095C	YGR095C ... RRP46 35S primary transcript process 3'-5'-exoribonuclease activity nuclear exosome (RNase complex)* | YGR096W	-0.40729	0.181716	-0.354197	0.0455641	0.304453	0.809838	0	-0.335517	-0.303282	-0.466287	-0.351038	-0.043447	0.680343	0	-0.356099	-0.394249	-0.512877	-0.683289	-0.273889	0.387643
YOL019W	YOL019W ... YOL019W biological process unknown molecular function unknown plasma membrane* | YOL019W-A	-0.662858	-0.489273	0.250986	-0.182833	0.255295	1.10064	0	-0.203384	-0.374534	0.308834	-0.132045	0.237378	0.564733	0	-0.264463	-0.588943	-0.838389	-0.4373	-0.599031	0.0892814
YJL145W	YJL145W ... SFH5 phospholipid transport phosphatidylinositol transporter accytosol* | YJL146W	-1.27078	-0.358602	-1.00602	-0.0601954	-0.190681	0.215144	0	-0.755825	-0.590762	-0.962926	-0.0882044	-0.246526	0.572552	0	-1.0377	-0.692346	-0.577671	-0.498641	-0.246959	0.470912
YMR221C	YMR221C ... FMP42 biological process unknown molecular function unknown mitochondrion* | YMR222C	-0.924312	-0.627907	-0.978437	-0.883012	-0.254368	0.00155918	0	-0.554835	-0.204609	-0.400511	-0.588367	-0.500173	-0.174117	0	-1.31819	-1.76817	-0.671367	-0.640769	-0.20553	0.340606
YLR063W	YLR063W PAC cluster YLR063W biological process unknown molecular function unknown cytoplasm | YLR064W	0.236792	0.621568	-0.681031	-0.00427613	-0.463143	0.607461	0	0.555482	0.913551	-0.105331	-0.176607	0.537964	1.43566	0	-0.905381	0.18271	-1.15192	-0.693958	0.0357261	1.30778
YDR042C	YDR042C ... YDR042C biological process unknown molecular function unknown cellular component unknown | YDR043C	0.537961	0.974084	0.30682	0.476614	-0.184956	3.19242	0	1.84405	1.09882	0.52952	0.841225	0.536831	2.61123	0	0.235323	-0.806848	0.869953	1.37189	1.23699	3.58146
YMR171C	YMR171C … EAR1 biological process unknown molecular function unknown | Specificity factor required for Rsp5p-dependent ubiquitination and sorting of specific cargo proteins at the multivesicular body; mRNA is targeted to the bud via the mRNA transport system involving She2pYMR172C-A	-0.0927189	0.167908	0.145343	0.16014	0.684262	0.861187	0	-0.224795	-0.181292	-0.260801	-0.439227	0.0950524	0.286422	0	-0.263182	-0.148356	-0.505575	-0.472672	-0.0376712	0.362957
YLR130C	YLR130C ... ZRT2 low-affinity zinc ion transpor low-affinity zinc ion transporter aplasma membrane | YLR131C	-1.31407	-0.83359	-0.676479	-0.37186	-0.0940361	-0.342049	0	-0.154337	-0.0233727	-0.589515	-0.517364	-0.270044	-0.0592176	0	-0.484206	-0.350868	-0.861172	-0.699807	-0.275317	0.0184164
YGR123C	YGR123C PAC cluster PPT1 protein amino acid phosphoryla protein serine/threonine phosphatascytoplasm* | YGR124W	-0.887661	-0.558411	-1.01338	-0.344783	-0.627474	-0.090343	0	-0.654624	-0.778327	-0.59357	-0.159163	-0.645066	0.0751799	0	-0.606211	-0.41453	-0.640161	-0.599347	0.132887	0.597596
YNR015W	YNR015W ... SMM1 tRNA modification* tRNA dihydrouridine synthase activicytoplasm* | YNR016C	0.253686	0.132037	-0.126178	-0.207643	0.334063	0.563067	0	0.0999294	-0.0483376	-0.293349	-0.424528	0.240882	0.625732	0	0.254776	-0.20019	-0.641109	-0.723102	-0.160867	0.251795
YGL139W	YGL139W … FLC3 biological process unknown molecular function unknown | Putative FAD transporter, similar to Flc1p and Flc2p; localized to the ERYGL140C	-0.564144	-0.148732	-0.428812	-0.252712	-0.302174	0.641029	0	-0.578494	-0.332266	0.0685959	-0.245055	0.0285014	0.575473	0	-0.669832	-0.801824	-0.145175	-0.0346736	-0.104231	0.831731
YGR020C	YGR020C ... VMA7 vacuolar acidification hydrogen-transporting ATPase activivacuolar membrane (sensu Fungi)* | YGR021W	-0.476456	-0.0837521	-0.528865	-0.217935	0.114017	0.36606	0	-0.256634	-0.266736	-1.0102	-0.543775	-0.189314	0.261579	0	0.0168302	-0.0410394	-0.372464	-0.560246	-0.176309	0.502081
YOL154W	YOL154W ... ZPS1 biological process unknown molecular function unknown cell wall (sensu Fungi)* | YOL155C	-0.0172539	-0.113577	-0.237616	-0.680927	0.415948	1.60746	0	-1.15764	-0.509061	0.349104	-0.311885	0.55494	1.56684	0	-0.742222	-0.93955	-0.120516	-0.11022	1.13603	2.45242
YLL024C	YLL024C ... SSA2 protein folding ATP binding cytoplasm* | YLL025W	-1.04619	-0.386602	-0.927377	-0.275085	-0.933816	-0.157435	0	-1.0766	-0.223545	-0.676777	-0.126712	0.0486217	0.81752	0	-0.552	-0.539248	0.198419	-0.210714	0.0711719	0.877595
YIL114C	YIL114C ... POR2 ion transport voltage-gated ion-selective channelmitochondrion* | YIL115C	-0.495301	0.0837375	-0.0775459	-0.147824	0.329863	0.217873	0	-0.211385	0.183016	-0.484674	-0.195516	0.17705	0.361873	0	-0.924194	-0.80631	-0.699662	-0.923308	-0.0876049	-0.0793041
YMR208W	YMR208W ... ERG12 ergosterol biosynthesis mevalonate kinase activity cytosol | YMR209C	-0.77005	-0.44997	-0.896413	-0.80753	-0.370345	-0.155337	0	-0.449335	-0.0229295	-0.385378	-0.513308	-0.00079	0.350838	0	-1.29585	-1.36429	-0.493942	-0.448956	-0.873247	-0.450579
YJR105W	YJR105W ... ADO1 purine base metabolism adenosine kinase activity cytoplasm* | YJR106W	-0.625893	0.0136819	-0.208378	-0.32925	0.408074	0.80913	0	-0.542009	-0.130216	-0.572509	-0.696189	0.321849	0.765797	0	-0.699095	-0.767735	-0.427679	-0.59328	0.224575	0.58962
YGR063C	YGR063C ... SPT4 regulation of transcription, D RNA polymerase II transcription elonucleus* | YGR064W	-1.52738	-0.927428	-0.9141	-0.367432	-0.411216	-0.22352	0	-0.941705	-0.668381	-1.13095	-0.506475	-0.614099	-0.317214	0	-0.667502	-0.821997	-0.81366	-0.645555	-0.093103	0.103206
YCR047C	YCR047C ... BUD23 bud site selection S-adenosylmethionine-dependent methcytoplasm* | YCR048W	-0.22884	-0.406965	0.0758655	-0.344649	-0.189773	-0.160366	0	-0.57143	-0.837221	-0.303842	-0.73619	-0.155281	-0.00849515	0	-0.920158	-0.989907	-0.819108	-0.963896	-0.490061	-0.328466
YDR280W	YDR280W PAC cluster RRP45 35S primary transcript process 3'-5'-exoribonuclease activity nuclear exosome (RNase complex)* | YDR281C	-0.895816	-0.347519	-0.790897	-0.374389	-0.470995	0.1446	0	-0.714271	-0.75204	-0.927678	-0.438987	-0.313356	0.211188	0	-0.766842	-0.618785	-0.702595	-0.25231	-0.0935374	0.424531
YDL171C	YDL171C ... GLT1 glutamate biosynthesis glutamate synthase (NADH) activity mitochondrion* | YDL172C	-1.01303	-0.463606	-0.390672	-0.616465	-0.813118	0.0776756	0	0.00209152	0.166175	-0.0325012	0.0893066	0.546795	1.03934	0	-0.14522	-0.00146018	-0.577763	-0.733973	-0.467695	0.329647
YPL244C	YPL244C ... HUT1 UDP-galactose transport UDP-galactose transporter activity cellular component unknown | YPL245W	-0.927532	-0.560129	-0.845642	-0.234808	-0.806897	-0.625864	0	-0.507621	-0.245782	-0.832191	-0.206055	-0.607898	-0.106799	0	-0.717974	-0.66066	-0.802315	-0.548859	-0.347412	0.011552
YOR101W	YOR101W ... RAS1 Ras protein signal transductio GTPase activity plasma membrane | YOR102W	-1.41354	-0.648448	-0.521107	-0.458961	-0.705205	0.0224985	0	-0.616029	-0.6032	-0.346769	-0.472599	-0.261465	0.722402	0	-0.797692	-0.59444	-0.933928	-1.23353	0.413602	1.28205
YLL052C	YLL052C ... AQY2 water transport water channel activity plasma membrane* | YLL053C	-0.239646	-0.862417	1.10792	0.998567	0.389953	3.72294	0	-0.103481	-0.474651	1.82155	-0.0518603	0.896234	2.83363	0	-0.307819	-0.643349	1.29556	0.79615	-0.33559	3.24888
YBR086C	YBR086C ... IST2 response to osmotic stress molecular function unknown plasma membrane* | YBR087W	-0.53009	-0.207904	-0.457313	-0.7254	-0.0170751	0.508779	0	-0.318746	0.0764634	-0.897326	-0.889693	0.0717393	0.307125	0	-0.170607	-0.325954	-0.289646	-0.669293	0.0207514	0.666657
YHR007C	YHR007C ... ERG11 ergosterol biosynthesis sterol 14-demethylase activity endoplasmic reticulum | YHR007C-A	-1.29545	-0.815179	-0.869278	-0.428127	0.137254	0.282243	0	-0.400352	0.141104	-0.557027	-0.681429	-0.000488	0.163919	0	-1.3814	-1.14894	-0.361171	-0.0201983	-0.276099	0.0687962
YBR034C	YBR034C PAC cluster HMT1 mRNA-nucleus export* protein-arginine N-methyltransferasnucleus | YBR035C	-0.701299	-0.233084	-0.562942	-0.282684	-0.214732	0.511422	0	-0.34836	-0.321642	-0.590679	-0.316708	-0.0247781	0.644539	0	-0.967016	-0.892865	-0.797178	-0.618862	-0.0580561	0.534765
YDL236W	YDL236W ... PHO13 protein amino acid dephosphory alkaline phosphatase activity* cytoplasm* | YDL237W	-0.793116	-0.037501	-1.2793	-0.563193	0.281743	-0.101273	0	-0.837831	-0.515037	-1.33736	-0.548431	-0.00450479	0.243813	0	-1.81191	-1.80417	-0.931126	-1.11108	0.10995	-0.131782
YLL053C	YLL053C ... YLL053C biological process unknown molecular function unknown cellular component unknown | YLL054C	0.219785	-1.04056	1.09532	1.14647	0.737876	1.60746	0	0.210834	-0.848716	2.12676	0.482771	1.98934	2.02627	0	0.0426784	0.222899	1.32681	0.990804	1.24937	1.95343
YGR177C	YGR177C ... ATF2 steroid metabolism alcohol O-acetyltransferase activitcytoplasm* | YGR178C	-0.936719	-0.543168	-0.917177	-0.731513	-0.408332	0.15785	0	-0.968754	-0.692597	-1.64353	-0.87397	-0.673622	0.0955329	0	-1.10209	-1.06988	-0.509223	-1.03904	-0.174641	0.370027
YJR016C	YJR016C ... ILV3 branched chain family amino ac dihydroxy-acid dehydratase activitymitochondrion | YJR017C	-0.503241	0.278283	-0.486707	-0.121587	0.463627	0.70561	0	0.00582909	0.500508	-0.834894	0.110397	0.71263	1.1448	0	-0.304349	-0.0185686	-0.524834	-0.608277	-0.401939	-0.00705939
YDL212W	YDL212W ... SHR3 ER to Golgi transport* unfolded protein binding integral to endoplasmic reticulum m | YDL213C	-0.600318	-0.535034	-0.622926	0.0632638	0.0391376	0.284692	0	-0.701903	-0.561298	-1.13316	-0.2458	-0.21882	0.277204	0	-0.998981	-1.16277	-0.439531	-0.446767	0.324361	0.480056
YNL216W	YNL216W ... RAP1 chromatin silencing at telomer DNA binding* nucleus* | YNL217W	-0.531058	-0.274298	-1.04158	-0.911412	-0.975435	0.0370818	0	-0.795872	-0.678096	-0.865877	-0.550056	-0.429187	0.21262	0	-0.685645	-0.704939	-0.55096	-0.614949	-0.459898	0.435233
YDR158W	YDR158W ... HOM2 methionine metabolism* aspartate-semialdehyde dehydrogenascytoplasm* | YDR159W	-0.474041	0.0898021	0.286528	0.354498	0.104334	0.0922227	0	-0.219021	-0.0829437	-0.549912	0.690979	0.726902	0.771377	0	0.0365484	-0.0188446	-0.581052	-0.671938	-0.474956	-0.398648
YNL309W	YNL309W ... STB1 G1/S transition of mitotic cel transcriptional activator activity cytoplasm* | YNL310C	0.0942545	-0.0632825	-0.289018	-0.93035	-0.0606551	0.339689	0	0.103919	-0.371363	-0.471445	-0.638656	-0.240444	0.504924	0	-0.0905882	-0.384783	-0.78455	-0.709221	-0.669368	0.136905
YJL194W	YJL194W ... CDC6 pre-replicative complex format protein binding* pre-replicative complex | YJL195C	-0.77166	0.0984244	-0.87066	-0.633386	0.136972	0.859946	0	-0.44317	-0.10051	-0.905646	-0.565227	0.230351	0.863717	0	-1.86739	-1.4778	-0.85494	-0.847148	0.36252	0.702809
YIL020C	YIL020C PAC cluster HIS6 histidine biosynthesis 1-(5-phosphoribosyl)-5-[(5-phosphorintracellular | YIL020C-A	-0.465528	0.142684	-1.20508	-0.585339	0.238643	-0.220773	0	-0.457118	0.175437	-2.00099	-0.979847	-0.233049	-0.509783	0	-1.29533	-1.22189	-0.85494	-0.894246	0.30184	0.0283319
YFR028C	YFR028C ... CDC14 protein amino acid dephosphory phosphoprotein phosphatase activitynucleus* | YFR029W	-0.724463	-0.400329	-0.664434	-0.384779	-0.36038	0.240404	0	-0.603656	-0.631821	-0.647836	-0.413968	-0.0257903	0.338127	0	-0.162297	-0.17299	-0.235518	-0.18274	0.181156	0.760945
YNL289W	YNL289W ... PCL1 cell cycle cyclin-dependent protein kinase regcyclin-dependent protein kinase hol | YNL290W	-0.281294	-0.157985	-0.930219	-0.218532	0.519452	0.506293	0	0.746367	0.421107	-1.50107	0.504725	0.331007	0.719959	0	-0.357942	-0.920058	-0.669447	-0.803344	-0.541735	-0.327225
YLR437C	YLR437C … DIF1 biological process unknown molecular function unknown | Protein that regulates the nuclear localization of ribonucleotide reductase Rnr2p and Rnr4p subunits; phosphorylated by Dun1p in response to DNA damage and degraded; N-terminal half has similarity to S. pombe Spd1 proteinYLR438C-A	-0.54875	-0.860342	-0.881993	-1.00554	0.0673466	-0.810572	0	-0.687669	-0.708793	-1.22629	-1.37637	-0.14128	-0.516048	0	-0.332166	-0.717968	-0.743144	-0.833425	-0.0471005	-0.314442
YER044C	YER044C ... ERG28 ergosterol biosynthesis "protein binding, bridging" endoplasmic reticulum membrane | YER044C-A	-0.566421	-0.267028	-0.239921	-0.279903	0.677485	0.987575	0	0.0696512	0.356706	-0.434739	-0.442877	0.461427	0.904793	0	-0.602242	-0.713958	0.244988	0.121476	0.220777	0.599446
YMR241W	YMR241W ... YHM2 tricarboxylic acid transport tricarboxylate carrier activity mitochondrial inner membrane | YMR242C	-0.910031	-0.321299	-0.632713	-0.292956	-0.558896	0.285852	0	-0.127222	-0.0423673	-0.796597	0.00606591	-0.244439	0.433634	0	-0.513883	-0.573501	-0.601084	-0.559039	-0.181928	0.412321
YOR107W	YOR107W ... RGS2 G-protein signaling, coupled t GTPase activator activity cytoplasm* | YOR108W	-0.317649	-0.290969	-0.645652	-0.634894	0.389953	0.659928	0	0.614983	0.253037	-0.856604	-0.528709	1.38166	1.61123	0	0.0996054	-0.530008	-1.20805	0.0499662	1.40138	2.15696
YBL020W	YBL020W ... RFT1 N-linked glycosylation* oligosaccharide transporter activitendoplasmic reticulum membrane | YBL021C	-0.8116	-0.545414	-0.798181	-0.659386	-0.909014	0.00640454	0	-0.2732	-0.0958768	-0.526333	-0.267616	-0.284595	0.258104	0	-0.270666	-0.677273	-0.374086	-0.44805	-0.327691	0.333968
YLR380W	YLR380W ... CSR1 cell wall organization and bio phosphatidylinositol transporter accytoplasm* | YLR381W	-0.537992	-0.327452	-0.809317	-0.656194	-0.230392	0.0405163	0	-0.766124	-0.77053	-0.62767	-0.550742	-0.273583	0.28628	0	-0.217897	-0.38778	-0.399141	-0.297996	-0.146757	0.350278
YOL136C	YOL136C ... PFK27 fructose 2,6-bisphosphate meta 6-phosphofructo-2-kinase activity cytoplasm | YOL137W	0.0237008	0.134743	-1.2546	-0.784134	-0.820967	0.331798	0	-0.0888433	-0.202934	-1.1209	-1.08222	-0.683847	-0.166605	0	-0.50492	-0.837654	-0.766956	-0.408284	-0.889762	0.102937
YNR021W	YNR021W ... YNR021W biological process unknown molecular function unknown endoplasmic reticulum | YNR022C	-0.908558	-0.279124	-0.656902	-0.146929	-0.0199232	0.562192	0	-0.484582	-0.328629	-1.1128	-0.41814	-0.0459901	0.493595	0	-0.0621178	-0.160674	-0.146037	-0.192059	0.123998	0.687563
YOR009W	YOR009W ... TIR4 biological process unknown molecular function unknown cell wall (sensu Fungi) | YOR010C	-0.763124	-0.601842	-0.713459	-1.33848	-1.41915	-0.504101	0	-0.230781	0.149469	-0.876826	-1.25999	-0.810572	-0.0293737	0	-0.706248	-1.04764	-0.539934	-1.05826	-0.945101	0.0235631
YBR069C	YBR069C ... TAT1 amino acid transport amino acid transporter activity plasma membrane | YBR070C	1.09715	1.3654	-0.270126	0.273345	0.758054	1.95173	0	0.496229	0.669761	-0.919567	-0.435849	0.00952086	0.600964	0	-1.50063	-1.77553	0.37673	-0.153567	0.836591	2.07126
YNL280C	YNL280C ... ERG24 ergosterol biosynthesis delta14-sterol reductase activity endoplasmic reticulum | YNL281W	-1.04494	-0.836262	-0.774531	-0.56724	0.0831108	0.0261025	0	-0.679766	-0.159576	-1.14555	-0.680524	-0.343947	-0.141942	0	-0.82375	-0.944286	-0.344932	-0.216157	-0.288041	-0.159887
YNR039C	YNR039C ... ZRG17 zinc ion transport molecular function unknown endoplasmic reticulum | YNR040W	-0.0679987	-0.00407211	-0.343397	-0.463121	-0.0230434	0.448576	0	-0.389726	-0.0342721	-0.483818	-0.366593	-0.020805	0.431198	0	-0.0564663	-0.296759	-0.530409	-0.5701	-0.130638	0.437493
YMR210W	YMR210W ... YMR210W biological process unknown molecular function unknown cellular component unknown | YMR211W	-0.810455	-0.408996	-0.54695	-0.689365	0.0958588	0.382169	0	-0.518732	-0.265547	-0.565258	-1.235	-0.128713	-0.129601	0	-1.76157	-1.22189	-0.215427	-0.180542	-0.542041	-0.0576767
YGL169W	YGL169W PAC cluster SUA5 aerobic respiration molecular function unknown cytoplasm | YGL170C	-0.731799	-0.0872475	-0.932934	-0.125422	-0.0584238	0.437536	0	-0.32764	-0.19585	-0.915021	-0.161494	0.121793	0.503084	0	-0.64178	-0.573632	-0.651656	-0.39364	-0.0420536	0.560085
YIL140W	YIL140W ... AXL2 bud site selection* molecular function unknown bud neck* | YIL141W	-0.348647	0.21333	-0.355496	-0.0301998	-0.248949	0.842949	0	0.228465	0.416769	-0.913251	-0.0867569	-0.412519	0.131932	0	-0.686737	-0.701979	-0.839548	-0.552679	-0.74037	-0.123114
YDR531W	YDR531W … CAB1 coenzyme A biosynthesis pantothenate kinase activity | Pantothenate kinase (ATP:D-pantothenate 4'-phosphotransferase, EC 2.7.1.33); catalyzes the first committed step in the universal biosynthetic pathway for synthesis of coenzyme A (CoA)YDR532C	-0.387035	-0.00677413	-0.421571	-0.35329	-0.0492754	0.932386	0	-0.098535	-0.355497	-1.02484	-0.372819	-0.0125078	0.820328	0	-0.917066	-1.39866	-0.45476	-0.648454	-0.375598	0.514366
YEL006W	YEL006W … YEA6 transport transporter activity | Putative mitochondrial NAD+ transporter, member of the mitochondrial carrier subfamily (see also YIA6); has putative human orthologYEL007W	-0.260967	0.169696	-0.0914344	0.232666	0.426259	0.779825	0	-0.0630247	-0.0430304	-0.156705	0.0350331	0.312478	0.770541	0	-0.737748	-1.04754	-0.37787	-0.129755	0.0854712	0.586189
YHR163W	YHR163W ... SOL3 tRNA processing* 6-phosphogluconolactonase activity cytoplasm* | YHR164C	-0.41913	0.329167	0.482501	0.635973	0.587339	0.454138	0	-0.542499	0.171596	-0.147491	0.423842	0.320618	0.890991	0	-0.888433	-0.553829	-0.131346	-0.336743	0.264033	0.492882
YOR026W	YOR026W ... BUB3 mitotic spindle checkpoint molecular function unknown condensed nuclear chromosome kineto | YOR027W	-0.301803	0.182733	-1.02801	-0.480601	0.0391623	0.623726	0	-0.0646699	-0.272632	-0.84602	-0.505033	-0.102155	0.148526	0	-0.200655	-0.18835	-0.409093	-0.392676	-0.0824402	0.810023
YNL182C	YNL182C PAC cluster IPI3 35S primary transcript process molecular function unknown nucleus* | YNL183C	0.0843171	0.549041	-0.317306	0.0835586	-0.0917604	0.929389	0	0.18786	-0.00433987	-0.324072	-0.212868	-0.0901958	0.672872	0	-0.710014	-0.264698	-0.749749	-0.677015	-0.268978	0.776753
YBR101C	YBR101C ... FES1 protein biosynthesis adenyl-nucleotide exchange factor acytosol* | YBR102C	-0.815767	-0.0664451	-0.686387	-0.0313058	-0.672079	-0.123252	0	-0.986377	-0.333524	-0.26468	-0.286959	-0.199551	0.558591	0	-0.853125	-0.713932	-0.586082	-0.469272	-0.322213	0.467915
YIL079C	YIL079C PAC cluster AIR1 mRNA-nucleus export* molecular function unknown nucleus* | YIL082W	-0.499166	-0.0452013	-0.921286	-0.00247798	-0.294185	0.572527	0	0.17521	-0.228525	-0.551864	0.0184415	0.00772151	0.892558	0	-0.715836	-0.171446	-1.29316	-0.779768	-0.491709	0.325795
YNL251C	YNL251C ... NRD1 transcription termination from RNA binding nucleus | YNL252C	-0.422356	-0.338253	-0.429134	-0.61585	-0.373485	0.130664	0	-0.726949	-0.558497	-0.369938	-0.688155	-0.62109	-0.0424425	0	-0.536173	-0.499103	-0.356701	-0.219146	-0.284301	0.367536
YPR145W	YPR145W PAC cluster ASN1 asparagine biosynthesis asparagine synthase (glutamine-hydrcytoplasm | YPR146C	-0.953124	-0.340778	-0.682748	0.436015	-0.21897	0.496107	0	0.42713	0.799492	-0.358488	1.05497	0.591401	1.16989	0	-0.57312	-0.313959	-0.691674	-0.853387	-0.737301	0.0655751
YIR019C	YIR019C ... MUC1 pseudohyphal growth* molecular function unknown plasma membrane | YIR020C	-0.487006	0.842081	-0.479113	-1.82316	-0.354881	0.0224985	0	-0.683984	0.164746	-1.01937	-0.964903	-0.541172	0.310063	0	-0.836314	-1.55471	-0.0659634	-0.109446	-1.34797	-0.490408
YHL011C	YHL011C PAC cluster PRS3 histidine biosynthesis* ribose-phosphate diphosphokinase accytoplasm | YHL012W	-1.22965	-0.542609	-0.716821	-0.397691	-0.461255	-0.0385837	0	-0.229049	-0.0657168	-0.502668	-0.395933	-0.261835	0.238163	0	-0.676162	-0.652781	-0.694811	-0.665373	-0.200351	0.326243
YPL211W	YPL211W PAC cluster NIP7 rRNA processing* molecular function unknown nucleolus* | YPL212C	-1.25699	-0.443006	-1.46073	-0.214811	-0.559663	-0.385966	0	-0.438782	-0.346277	-0.794543	-0.296331	-0.41977	-0.0274176	0	-0.590063	-0.378525	-0.70363	-0.710187	0.503363	0.696488
YBL054W	YBL054W … PAC cluster TOD6 biological process unknown molecular function unknown | Protein involved in rRNA and ribosome biogenesis; binds polymerase A and C motif; subunit of the RPD3L histone deacetylase complex; similar to Dot6p; contains chromatin specific SANT domainYBL055C	0.103086	-0.337568	-0.297783	-0.43455	-0.398261	1.19858	0	0.277215	-0.623999	0.179041	-0.600139	-0.264151	0.833625	0	-1.22482	-1.41453	-1.2639	-0.951682	-0.586369	0.813146
YER146W	YER146W ... LSM5 nuclear mRNA splicing, via spl RNA binding nucleolus* | YER147C	-0.838092	-0.721061	-0.645105	-0.203119	-0.289809	-0.478072	0	-0.635056	-0.68219	-0.911989	-0.485276	-0.725096	-0.394573	0	-0.253819	-0.4431	-0.236488	-0.511224	0.380168	0.107641
YLR300W	YLR300W ... EXG1 cell wall organization and bio "glucan 1,3-beta-glucosidase activit"cell wall (sensu Fungi) | YLR301W	-1.14432	-0.833416	0.829169	0.48089	1.63359	1.85077	0	-0.320842	-0.0372673	0.896024	0.161215	1.24637	1.31856	0	0.647347	0.576473	0.47014	0.525995	1.55079	1.76401
YKR099W	YKR099W ... BAS1 transcription from RNA polymer RNA polymerase II transcription facnucleus | YKR100C	-0.217191	0.0382147	-0.70768	-0.212092	-0.235756	1.30261	0	0.409125	0.258015	-0.0979561	-0.235189	0.174206	1.22854	0	-0.744517	-0.314995	-0.977196	-0.723628	-0.953804	0.56228
YNL231C	YNL231C ... PDR16 response to drug* phosphatidylinositol transporter accytoplasm* | YNL232W	-1.00416	-0.0287491	-1.01663	-0.582887	-0.842068	-0.122932	0	0.35139	0.573826	-0.619904	-0.448995	0.0411819	0.694427	0	-1.86241	-1.79651	-1.56696	-1.28346	-0.47075	0.192914
YCL059C	YCL059C PAC cluster KRR1 rRNA processing* molecular function unknown nucleolus* | YCL061C	-0.161967	0.0452983	-0.680543	0.176728	-0.606507	0.248713	0	0.417733	0.0979085	-0.785266	0.211839	-0.283472	0.573758	0	-0.0884114	0.261271	-0.762315	-0.515188	-0.56015	0.457175
YDR043C	YDR043C ... NRG1 regulation of transcription fr DNA binding* nucleus | YDR044W	-0.27812	0.441747	1.66713	0.694902	1.88352	3.36489	0	0.135374	0.574965	1.60046	0.290125	1.02587	2.04334	0	-0.790212	-0.677565	1.16052	0.820355	1.3639	2.91546
YDR033W	YDR033W ... MRH1 biological process unknown molecular function unknown mitochondrion* | YDR034C	-0.0129856	0.164268	0.566666	0.631229	0.49776	2.09629	0	-0.106574	0.545734	0.0315847	-0.438563	0.757673	1.59297	0	0.79367	0.584611	1.06046	0.707617	1.89608	2.9829
YCR075C	YCR075C ... ERS1 L-cystine transport L-cystine transporter activity integral to membrane | YCR075W-A	-0.958626	-0.783345	-0.0357981	-0.0923215	0.193555	0.217146	0	-0.720642	-0.326038	-0.398754	-0.163674	-0.203302	0.220918	0	-0.802584	-0.668113	0.44774	-0.0188956	0.6155	0.620528
YDL235C	YDL235C ... YPD1 response to osmotic stress* "transferase activity, transferring"cytoplasm | YDL236W	-0.714185	-0.350012	-0.569034	-0.0143867	-0.369039	0.176865	0	-0.511632	-0.473207	-0.907193	-0.302754	-0.669189	0.164013	0	-0.269	-0.493175	-0.592944	-0.596818	-0.40557	0.331442
YPR063C	YPR063C ... YPR063C biological process unknown molecular function unknown endoplasmic reticulum | YPR064W	-0.604039	-0.0662245	-0.271032	-0.139463	0.391655	0.656938	0	-0.23342	-0.0690811	-0.783988	-0.472873	0.0898498	0.389873	0	-0.136938	-0.283627	-0.251625	-0.433826	0.140588	0.636559
YHR020W	YHR020W PAC cluster YHR020W tRNA aminoacylation for protei proline-tRNA ligase activity cellular component unknown | YHR021C	-0.0723354	0.541245	0.00452024	0.275963	0.0562783	0.664917	0	0.186707	0.357801	-0.615198	0.0640894	0.153962	0.741385	0	0.162841	0.196182	-0.404872	-0.477541	-0.339135	0.314059
YLR175W	YLR175W PAC cluster CBF5 rRNA modification* pseudouridylate synthase activity small nucleolar ribonucleoprotein c | YLR176C	-0.919766	-0.333396	-0.607918	0.00427955	-0.584942	0.0951438	0	-0.533132	-0.214133	-0.853671	-0.0810615	-0.595842	0.254194	0	-1.0719	-0.837265	-0.366246	-0.49803	-0.44623	0.294738
YBR104W	YBR104W ... YMC2 transport transporter activity mitochondrial inner membrane | YBR105C	-0.205699	0.332132	-0.313466	0.225075	0.00121032	0.640292	0	0.060405	-0.219729	-1.18422	0.0506987	0.144493	0.770597	0	-0.764677	-0.681635	-0.991341	-0.909392	-0.852866	-0.279401
YPR121W	YPR121W ... THI22 thiamin biosynthesis phosphomethylpyrimidine kinase acticellular component unknown | YPR122W	-0.0266526	0.582659	0.183672	0.25642	1.42916	2.74036	0	0.241728	-0.0890754	0.352643	0.309117	1.32865	2.25002	0	0.00357854	0.149651	0.318543	0.368663	0.965791	2.18418
YCR024C-B	YCR024C-B ... YCR024C-B biological process unknown molecular function unknown cellular component unknown | YCR025C	-0.936144	-0.335362	-0.336865	-0.793488	-0.25933	0.820753	0	-0.334444	-0.0285921	-1.18058	-1.00671	0.00584561	0.637637	0	-0.464188	-0.876018	-0.501172	-0.681754	-0.0114507	1.04226
YHL031C	YHL031C ... GOS1 vesicle fusion* v-SNARE activity integral to membrane | YHL032C	-0.2719	0.118777	-0.301441	-0.429285	0.246836	0.84728	0	0.19816	0.00326579	-0.687991	-0.772151	0.0426231	0.502708	0	-0.371013	-0.447496	-0.679377	-0.516715	-0.404929	0.511614
YPL127C	YPL127C ... HHO1 regulation of transcription, D DNA binding nucleus* | YPL128C	-0.993243	-0.975308	-1.05886	-0.697213	-0.403649	-0.0189936	0	-0.764381	-1.20089	-1.35417	-0.450429	-0.597054	0.147457	0	-0.292195	-0.704686	-0.406039	-0.746223	-0.243915	0.501413
YPR114W	YPR114W ... YPR114W biological process unknown molecular function unknown endoplasmic reticulum | YPR115W	-0.341756	0.0600376	-0.0131863	0.0290923	0.46096	0.688527	0	-0.408135	-0.0390498	-0.307033	-0.0666374	0.195201	0.715848	0	-0.643092	-0.781229	-0.176886	-0.0788408	0.174531	0.395342
YKL056C	YKL056C … RP cluster TMA19 biological process unknown molecular function unknown cytoplasm | Protein that associates with ribosomes; homolog of translationally controlled tumor protein; green fluorescent protein (GFP)-fusion protein localizes to the cytoplasm and relocates to the mitochondrial outer surface upon oxidative stressYKL057C	-0.61696	0.00978605	-0.347802	0.271065	-0.000565	0.42886	0	-0.222251	0.163626	-0.936872	0.146261	-0.0141526	0.683832	0	-0.248849	-0.421595	-0.129225	-0.243587	0.546806	0.912178
YHL029C	YHL029C … OCA5 metabolism molecular function unknown | Cytoplasmic protein required for replication of Brome mosaic virus in S. cerevisiae, which is a model system for studying replication of positive-strand RNA viruses in their natural hostsYHL030W	-0.673958	-0.0768378	-0.426293	-0.377809	-0.125946	0.418941	0	-0.376544	0.00901745	-0.629026	-0.765271	-0.010657	0.44692	0	-0.243718	-0.164947	-0.323735	-0.308792	-0.161031	0.415591
YKL018W	YKL018W ... SWD2 histone methylation* histone lysine N-methyltransferase mRNA cleavage and polyadenylation s | YKL019W	-0.642131	-0.0607121	-0.816908	-0.0847396	-0.127939	0.506957	0	-0.377993	-0.401818	-0.788523	-0.496044	-0.170203	0.257345	0	-0.476124	-0.352093	-0.670302	-0.516903	-0.0685104	0.582653
YLR413W	YLR413W PAC cluster YLR413W biological process unknown molecular function unknown cellular component unknown | YLR414C	-0.753692	-0.529583	-0.723593	-0.927358	-0.772015	0.0822868	0	-0.311216	-0.0990917	-1.12634	-1.01889	-0.263629	0.315257	0	-1.19187	-1.64924	-0.738777	-0.849242	-0.604072	0.397309
YER145C	YER145C ... FTR1 high affinity iron ion transpo iron ion transporter activity plasma membrane | YER146W	-0.42351	0.113194	-0.33061	0.05025	0.400006	0.808792	0	-0.466886	-0.117903	-0.305849	0.00472325	0.2431	0.441308	0	-0.611368	-0.969119	0.0678923	-0.0798017	0.437901	0.877324
YGL040C	YGL040C ... HEM2 heme biosynthesis porphobilinogen synthase activity cytoplasm* | YGL041C	-0.886861	-0.170025	-0.363612	-0.272918	0.484289	0.276214	0	-0.762101	-0.133432	-0.705696	-0.74199	0.36825	0.545144	0	-0.623234	-0.510795	0.234941	0.186586	0.0482528	0.207336
YBR175W	YBR175W ... SWD3 chromatin silencing at telomer histone lysine N-methyltransferase COMPASS complex | YBR176W	-0.583405	-0.0275768	0.0265318	0.443447	0.308368	0.589314	0	-0.632655	-0.159842	-0.440907	0.13148	-0.204537	0.646857	0	-0.913318	-0.710817	-0.173116	0.10886	0.450631	0.705397
YCR024C-A	YCR024C-A ... PMP1 cation transport enzyme regulator activity plasma membrane* | YCR024C-B	-1.02027	-0.918053	-1.06538	-0.850886	-0.47833	0.954896	0	-0.260585	-0.422721	-1.5497	-1.20094	-0.017982	0.838659	0	-0.481339	-1.07374	-0.828883	-0.842027	0.0593818	1.10938
YMR292W	YMR292W ... GOT1 ER to Golgi transport* molecular function unknown Golgi membrane | YMR293C	-0.698432	-0.672324	-0.35925	-0.0785446	-0.266711	-0.0639162	0	-0.392716	-0.717941	-0.588396	-0.108576	-0.293057	-0.0162902	0	-0.482405	-1.35882	-0.43049	-0.350136	0.388494	0.60106
YOR307C	YOR307C ... SLY41 ER to Golgi transport molecular function unknown endoplasmic reticulum | YOR308C	-0.615795	-0.630374	-0.567649	-0.742692	-0.350728	0.679197	0	-0.377511	-0.526401	-0.655666	-0.672329	-0.197988	0.246236	0	-0.45196	-0.574805	-0.0475849	0.0769018	-0.107884	0.964188
YBL013W	YBL013W ... FMT1 translational initiation* methionyl-tRNA formyltransferase acmitochondrion | YBL014C	0.392622	-0.229008	-0.8076	-1.34996	-0.322245	-0.055504	0	-0.473664	-0.120018	-0.726372	-1.36832	0.0646311	-0.363676	0	-0.594123	-1.06988	-0.792328	-0.346924	0.130074	0.0404838
YDL033C	YDL033C ... SLM3 protein biosynthesis* tRNA (5-methylaminomethyl-2-thiourimitochondrion | YDL034W	-0.304218	0.16386	-0.0415804	0.292873	0.347168	0.33113	0	-0.152629	0.0685431	-0.313934	-0.0970303	0.130355	0.506013	0	-0.807892	-0.59633	-0.462622	-0.187442	0.431964	0.475681
YMR312W	YMR312W ... ELP6 regulation of transcription fr RNA polymerase II transcription elotranscription elongation factor com | YMR313C	-0.116635	0.28404	-0.377546	-0.216685	0.0451636	0.586399	0	0.0548688	0.0841693	-0.120994	-0.358428	-0.183296	0.321468	0	-0.556124	-0.511392	-0.899651	-0.748105	-0.592131	0.113391
YDR331W	YDR331W ... GPI8 attachment of GPI anchor to pr GPI-anchor transamidase activity GPI-anchor transamidase complex | YDR332W	-0.813587	-0.252606	-0.51651	-0.398909	0.0526415	0.513916	0	-0.684722	-0.550242	-0.710136	-0.489898	-0.302838	0.215058	0	-0.00119521	-0.296151	-0.289946	-0.389328	0.0404533	0.421469
YHL039W	YHL039W PAC cluster YHL039W biological process unknown molecular function unknown cytoplasm | YHL040C	-0.605909	0.0740801	-0.34998	-0.147174	-0.262124	0.377284	0	-0.0902737	0.0344885	-0.598634	-0.195423	-0.14088	0.443195	0	-0.468963	-0.245581	-0.559664	-0.436651	-0.434308	0.259752
YNL036W	YNL036W ... NCE103 response to oxidative stress carbonate dehydratase activity cytoplasm* | YNL037C	-0.285704	0.683301	-0.658488	-0.414328	-0.396774	0.124378	0	-1.16191	-0.915708	-0.829808	-0.411625	-0.255241	0.168564	0	-1.26586	-1.97812	-0.414218	0.37582	-0.871405	0.029745
YEL026W	YEL026W RP cluster SNU13 nuclear mRNA splicing, via spl RNA binding nucleolus* | YEL027W	-0.576776	-0.228408	-0.724287	-0.253981	-0.215876	0.441666	0	-0.404629	-0.172853	-1.13168	-0.51701	-0.274469	0.392512	0	-0.04298	-0.495276	-0.369246	-0.783817	0.500693	1.00948
YBL068W	YBL068W PAC cluster PRS4 histidine biosynthesis* ribose-phosphate diphosphokinase accytoplasm | YBL069W	-0.862009	0.194727	-0.987552	-0.0430782	0.191004	0.385715	0	-0.702563	0.104362	-0.731498	-0.257562	0.0295601	0.630495	0	-0.63259	-0.0517229	-0.707315	-0.790556	0.134462	0.782973
YOR313C	YOR313C ... SPS4 sporulation (sensu Fungi)* molecular function unknown cellular component unknown | YOR314W	-0.0697213	-0.414958	-0.634763	0.613033	3.10045	3.72294	0	0.277948	-1.73769	-3.46043	0.715217	2.31127	0.611233	0	0.277144	0.263541	0.580446	0.912463	1.07945	1.88631
YOR204W	YOR204W ... DED1 translational initiation RNA helicase activity cytoplasm | YOR205C	-0.669927	-0.599731	-0.799328	-0.989486	-1.15574	-0.123278	0	-0.782621	-0.626465	-0.836851	-0.940135	-0.7512	-0.0253797	0	-0.164655	-0.635404	-0.210415	-0.475614	-0.279173	0.566596
YKL216W	YKL216W ... URA1 pyrimidine base biosynthesis dihydroorotate dehydrogenase activicytoplasm | YKL217W	-0.275742	0.338472	-0.31508	-0.0457125	0.436747	1.10906	0	0.064677	0.0116465	-0.476153	-0.223406	0.262908	0.930099	0	-0.928017	-0.630727	-0.850652	-0.802946	-0.451067	0.352152
YJR001W	YJR001W ... AVT1 neutral amino acid transport neutral amino acid transporter activacuole | YJR002W	-0.5941	-0.145199	0.181033	0.0918457	0.184036	0.35567	0	-0.569214	-0.200769	-0.120347	-0.0475788	0.190391	0.37316	0	-0.567256	-0.691	0.0351352	0.0430638	0.18068	0.467342
YPL175W	YPL175W ... SPT14 GPI anchor biosynthesis "transferase activity, transferring"endoplasmic reticulum | YPL176C	-0.374806	0.111588	0.00460222	-0.00642368	0.46446	0.788391	0	0.104821	-0.0214781	0.469896	-0.228336	0.316831	0.546918	0	-0.116934	-0.215887	-0.869248	-0.498595	-0.149458	0.0667317
YOR021C	YOR021C PAC cluster YOR021C biological process unknown molecular function unknown cellular component unknown | YOR022C	-0.329844	0.230997	-0.637043	-0.0174609	-0.102494	0.473337	0	-0.248598	-0.293029	-0.535056	-0.00869727	-0.126134	0.35543	0	-1.03028	-0.816329	-1.41815	-0.558565	0.0262545	0.21712
YER043C	YER043C PAC cluster SAH1 methionine metabolism* adenosylhomocysteinase activity cytoplasm | YER044C	-0.353418	0.221549	-0.14931	-0.110842	0.532883	1.1011	0	-0.440195	0.10724	-0.309467	-0.282989	0.288127	0.857847	0	-0.415534	-0.370732	-0.1203	-0.25677	0.102475	0.707368
YHR050W	YHR050W ... SMF2 manganese ion transport "di-, tri-valent inorganic cation tr"mitochondrion* | YHR050W-A	-0.226226	-0.0508308	-0.0423556	-0.332792	0.394468	0.922158	0	-0.421511	0.00382079	-0.125801	-0.480704	0.208999	0.48734	0	-0.425185	-0.5591	-0.0716974	0.00352922	0.0794474	0.724256
YPR009W	YPR009W ... SUT2 regulation of transcription fr specific RNA polymerase II transcrinucleus | YPR010C	-0.817883	-0.303718	-1.08836	-0.462043	-0.849513	-0.316188	0	-0.864057	-0.568857	-1.5026	-0.406552	-0.70123	0.0379837	0	-1.35441	-1.16046	-0.770319	-0.717453	-0.467823	0.170106
YOR342C	YOR342C ... YOR342C biological process unknown molecular function unknown cytoplasm* | YOR343C	-0.72231	-0.159228	-0.737211	-0.625016	-0.0606281	0.80328	0	-0.172294	0.262315	-1.08483	-0.777276	-0.180027	0.323843	0	-0.834957	-0.402341	-1.26031	-1.13345	-0.679886	0.194924
YDR119W	YDR119W … VBA4 biological process unknown molecular function unknown | Protein of unknown function with proposed role as a basic amino acid permease based on phylogeny; GFP-fusion protein localizes to vacuolar membrane; physical interaction with Atg27p suggests a possible role in autophagy; non-essential geneYDR120C	-0.806161	-0.366726	-0.715621	-0.106654	-0.134287	0.355567	0	-0.446923	-0.0923786	-1.32225	-0.391642	-0.0407927	0.445496	0	-0.348804	-0.450677	-0.169694	-0.442664	0.0404022	0.402004
YEL036C	YEL036C ... ANP1 N-linked glycosylation mannosyltransferase activity* mannosyltransferase complex* | YEL037C	-1.05113	-0.919979	-0.815481	-0.468999	-0.74855	-0.297835	0	-0.95862	-0.606574	-0.616851	-0.766861	-0.966414	-0.367644	0	-0.707749	-0.979657	0.0152159	0.0775355	-0.141282	0.591934
YPL057C	YPL057C ... SUR1 sphingolipid biosynthesis* mannosyltransferase activity* intracellular | YPL058C	-0.148556	-0.079861	-6.21e-06	-0.522751	0.627245	1.40166	0	0.351081	0.28449	-0.740257	-0.759974	0.331338	0.692582	0	0.321368	0.126753	-0.370374	-0.306084	-0.531229	0.287729
YEL028W	YEL028W ... | YEL029C	-0.725073	-0.192566	0.301106	0.699006	0.906273	1.68992	0	-0.66691	0.321209	0.282799	0.589686	0.637041	1.79679	0	-1.11517	-0.736459	-0.323219	-0.097591	0.216951	1.79885
YNR067C	YNR067C ... DSE4 cytokinesis, completion of sep "glucan 1,3-beta-glucosidase activit"cell wall (sensu Fungi)* | YNR068C	-0.874488	-0.883233	-0.273592	-1.0326	-0.0701294	0.373157	0	-0.453394	0.304769	-0.594238	-1.581	0.0690387	-0.275367	0	-1.10211	-0.879877	-1.16766	-1.07747	-0.653297	-0.134338
YER113C	YER113C … TMN3 biological process unknown molecular function unknown | Protein with a role in cellular adhesion and filamentous growth; similar to Emp70p and Tmn2p; member of Transmembrane Nine family with 9 transmembrane segments; localizes to Golgi; induced by 8-methoxypsoralen plus UVA irradiationYER114C	-0.528151	0.161881	-0.304615	0.0534923	-0.196546	0.392639	0	-0.530719	-0.00072	-0.391309	-0.104161	0.0161223	0.349002	0	-0.717097	-0.369206	0.0752718	0.0525219	0.119432	0.455304
YLR153C	YLR153C ... ACS2 acetyl-CoA biosynthesis acetate-CoA ligase activity cytosol | YLR154C	-0.367621	0.34957	0.0020655	-0.217833	0.595099	0.95704	0	-0.242381	0.253951	-0.200667	0.0103211	0.541997	0.997417	0	-0.624336	-0.444888	-0.0136376	0.0327258	-0.151302	0.343322
YOR012W	YOR012W ... YOR012W biological process unknown molecular function unknown cellular component unknown | YOR013W	0.249101	0.547074	-0.795918	-0.0715118	0.737876	1.16934	0	0.47903	0.240289	-1.51724	-0.382938	0.491843	1.21892	0	-0.572716	-0.774426	-0.881575	-0.725274	-0.920553	0.359066
YOL092W	YOL092W ... YOL092W biological process unknown molecular function unknown cytoplasm* | YOL093W	-0.617266	-0.59724	-0.568959	-0.379718	-0.36855	-0.0382555	0	-0.612215	-0.499124	-1.19401	-0.63112	-0.594032	0.0113199	0	-0.508962	-0.92457	-0.453054	-0.666165	0.0537989	0.618596
YGL111W	YGL111W PAC cluster NSA1 ribosomal large subunit biogen molecular function unknown nucleus* | YGL112C	-0.657674	0.075618	-0.637928	0.144578	-0.347905	0.277014	0	-0.0125546	0.0333423	-0.23598	0.0480693	-0.209203	0.499888	0	-0.288239	0.265182	-0.745261	-0.379461	-0.231482	0.456263
YMR017W	YMR017W ... SPO20 spore wall assembly (sensu Fun t-SNARE activity prospore membrane | YMR018W	-0.0172539	-0.571077	0.30682	1.04693	2.49687	4.92939	0	0.481481	-0.116197	0.288512	1.92226	2.14688	3.31905	0	-0.459822	0.469992	0.367453	1.5712	0.96397	1.92695
YOR276W	YOR276W PAC cluster CAF20 negative regulation of transla translation regulator activity mRNA cap complex | YOR277C	-1.25923	-0.379691	-0.881451	-0.142673	0.126707	0.334727	0	-0.708697	-0.502533	-1.116	-0.213013	0.00473187	0.577146	0	-0.390941	-0.418197	-0.444782	-0.622589	0.28349	0.703884
YOR013W	YOR013W … IRC11 | Dubious opening reading frame unlikely to encode a protein, based on available experimental and comparative sequence data; partially overlaps the uncharacterized gene YOR012C; null mutant displays increased levels of spontaneous Rad52 fociYOR014W	0.466946	0.819127	-0.0533897	0.044414	1.37798	1.52	0	0.436494	0.584243	-0.676559	-0.52628	0.387892	1.33112	0	-0.344345	-0.226458	-0.475222	-0.628106	0.320456	0.349047
YGR049W	YGR049W ... SCM4 cell cycle molecular function unknown mitochondrion | YGR050C	-0.660633	-0.266143	-0.0340055	-0.30051	1.84867	1.94311	0	-0.430843	-0.284928	-0.26869	-1.01134	1.02718	1.38501	0	-0.825667	-0.820983	0.503369	0.592003	0.677515	1.18715
YNR046W	YNR046W ... TRM112 tRNA methylation tRNA (guanine-N2-)-methyltransferascytoplasm* | YNR047W	-0.797642	-0.549836	-0.710357	-0.676787	-0.401818	-0.50342	0	-0.34335	-0.380283	-1.01303	-1.11594	-0.686178	-0.175552	0	-0.896188	-1.14015	-0.892388	-0.906467	-0.159531	0.0827199
YGR227W	YGR227W ... DIE2 N-linked glycosylation* dolichyl-phosphate-glucose-glycolipendoplasmic reticulum membrane | YGR228W	-0.496398	-0.314286	-0.515355	-0.737518	0.274785	0.658568	0	-0.534298	-0.36831	-0.717663	-0.784277	0.267644	0.308839	0	-1.03924	-1.41892	-0.764253	-1.05076	-0.332183	0.149529
YGR060W	YGR060W ... ERG25 ergosterol biosynthesis C-4 methylsterol oxidase activity plasma membrane* | YGR061C	-0.870066	-0.818536	-0.776829	-0.549632	0.134773	0.447245	0	-0.196213	0.00164867	-0.976023	-0.911243	-0.0144288	0.235655	0	-1.25061	-1.54839	-0.367847	-0.278729	-0.197687	0.307991
YOL061W	YOL061W ... PRS5 histidine biosynthesis* ribose-phosphate diphosphokinase accytoplasm | YOL062C	-0.674301	-0.233847	-0.453672	-0.368001	-0.0799182	0.14571	0	-0.407552	-0.13342	-0.477998	-0.540932	-0.173449	0.231175	0	-0.743848	-0.619631	-0.675419	-0.646847	-0.146416	0.220144
YBL006C	YBL006C ... LDB7 cell wall mannoprotein biosynt molecular function unknown cellular component unknown | YBL007C	-1.17389	-0.0282737	-0.870794	-0.896562	-0.332513	-0.481392	0	-0.452013	0.0334287	-0.910797	-0.870886	-0.122684	0.0914879	0	-1.16151	-0.62831	-0.575516	-0.991653	-0.163824	0.0366472
YKL183W	YKL183W ... LOT5 biological process unknown molecular function unknown cytoplasm* | YKL184W	-0.336508	-0.325419	-0.709122	-1.18652	-0.220912	-0.617606	0	0.0595245	0.0552368	-0.531509	-0.941237	-0.0523262	-0.105833	0	-1.53021	-1.82324	-2.09595	-1.05667	-0.936038	-0.638108
YOR320C	YOR320C ... GNT1 N-linked glycosylation acetylglucosaminyltransferase activGolgi medial cisterna | YOR321W	-0.403261	0.121976	0.269345	0.701549	0.491927	0.92586	0	-0.252596	-0.1566	-0.189535	0.158346	-0.0353191	0.482264	0	-0.634815	-0.414995	-0.19685	-0.015091	0.177134	0.725531
Cluster_3	#N/A	0	0	0	0	0	0	0	0	0	0	0	0	0	0	0	0	0	0	0	0
YOR066W	YOR066W … MSA1 biological process unknown molecular function unknown | Activator of G1-specific transcription factors, MBF and SBF; involved in regulation of the timing of G1-specific gene transcription and cell cycle initiation; localization is cell-cycle dependent and regulated by Cdc28p phosphorylationYOR067C	-0.345113	0.237709	0.0935489	-0.4256	0.532259	1.45917	0	-0.48656	-0.170157	-0.397512	-1.2737	0.00194302	0.691736	0	-0.603617	-0.250104	-0.810885	-0.706763	-0.68198	0.317118
YKL185W	YKL185W ... ASH1 pseudohyphal growth* specific transcriptional repressor nucleus | YKL186C	-0.376709	-0.202654	0.386895	-0.785284	1.00533	2.00996	0	-0.197735	0.345632	-0.0448582	-1.54033	0.266877	0.41894	0	-0.050673	0.0886597	-0.839592	-0.785213	-0.541265	0.513287
YGR041W	YGR041W ... BUD9 bud site selection molecular function unknown bud neck | YGR042W	-1.13685	-0.74267	-0.478098	-0.844506	-0.00555165	1.15635	0	-0.365516	0.123305	-0.605634	-1.1167	-0.0365673	0.465692	0	0.136296	0.215566	-0.503467	-0.797222	0.129913	1.06799
YGL028C	YGL028C ... SCW11 cytokinesis, completion of sep "glucan 1,3-beta-glucosidase activit"cell wall (sensu Fungi) | YGL029W	-1.31335	-1.21225	-0.148632	-1.24146	0.419734	1.08225	0	-1.01676	-0.18219	-0.397552	-1.98127	0.279357	0.166884	0	-1.01879	-0.822356	-1.00569	-1.08842	-0.231004	0.593745
YER124C	YER124C ... DSE1 cell wall organization and bio molecular function unknown bud neck | YER125W	-0.951703	-0.659845	-0.211809	-0.991879	0.487807	1.03524	0	-0.414938	0.280462	-0.383091	-1.68655	0.254725	-0.0734806	0	-0.841599	-0.0501783	-0.937051	-0.842055	-0.436133	0.258555
YLR286C	YLR286C ... CTS1 cytokinesis, completion of sep endochitinase activity endoplasmic reticulum* | YLR287C	-0.479653	-0.570194	0.253628	-0.447602	0.632059	1.56561	0	-0.396833	0.0680394	0.110446	-1.37984	0.224595	0.154191	0	-0.396274	-0.360015	-0.698874	-0.731003	-0.374549	0.490539
YHR143W	YHR143W ... DSE2 cell wall organization and bio "glucan 1,3-beta-glucosidase activit"cell wall (sensu Fungi)* | YHR143W-A	-0.609403	-0.742123	0.0233421	-0.85288	0.454673	1.14536	0	-0.390349	-0.033141	-0.278602	-1.70627	0.187202	-0.160933	0	0.0166161	-0.0549061	-0.900666	-0.860239	-0.402223	0.38708
YBR158W	YBR158W ... AMN1 negative regulation of exit fr protein binding cytoplasm* | YBR159W	-1.01003	-0.554418	-0.519529	-0.853795	0.0993698	1.09688	0	-0.444078	0.234684	-0.608226	-1.33224	-0.139713	0.346671	0	-0.892341	-0.46952	-0.654817	-0.802591	0.134075	1.02649
YPL158C	YPL158C … AIM44 biological process unknown molecular function unknown | Protein of unknown function; GFP-fusion protein localizes to the bud neck; transcription is regulated by Swi5p; null mutant displays elevated frequency of mitochondrial genome lossYPL159C	-1.1646	-0.841691	-0.46422	-0.674354	-0.439703	1.03663	0	-0.596521	0.114374	-0.86704	-1.18006	-0.180582	0.446977	0	-0.292493	0.532941	-0.93511	-0.594342	-0.559963	0.841817
YMR055C	YMR055C ... BUB2 mitotic spindle checkpoint GTPase activator activity spindle pole body | YMR056C	-0.983548	-1.21405	-0.154453	-0.842219	0.245032	0.783712	0	-0.730569	-0.702196	0.125763	-1.34011	0.0437908	0.0978235	0	-0.737461	-1.0674	-0.708098	-0.331388	0.236989	0.796228
YMR002W	YMR002W … MIC17 biological process unknown molecular function unknown | Mitochondrial intermembrane space cysteine motif protein; MIC17 is not an essential geneYMR003W	-0.61769	-0.350561	0.0362548	-0.411351	0.57609	0.322059	0	-0.893681	-0.937788	0.073324	-1.16621	0.231998	0.126299	0	-0.689519	-0.694201	-0.358434	-0.388545	0.297753	0.384517
YLR285C-A	YLR285C-A ... YLR285C-A biological process unknown molecular function unknown cellular component unknown | YLR285W	-0.729646	-0.702796	0.108769	-0.561503	0.75278	1.75846	0	-0.186056	-0.202763	-0.127212	-1.43882	0.224233	0.270754	0	-0.100638	-0.206259	-0.850227	-0.854231	-0.279079	0.759541
Cluster_4	#N/A	0	0	0	0	0	0	0	0	0	0	0	0	0	0	0	0	0	0	0	0
YPL113C	YPL113C ... YPL113C metabolism oxidoreductase activity cellular component unknown | YPL114W	-1.31365	-0.629083	0.404336	0.647659	1.28807	1.0965	0	-1.50341	-1.21484	1.20546	0.513737	0.448775	0.393053	0	-0.196788	0.409313	1.83694	1.25642	-0.013662	0.322884
YPL081W	YPL081W RP cluster RPS9A protein biosynthesis* structural constituent of ribosome cytoplasm* | YPL082C	-1.39329	-0.687384	-0.414458	-0.612228	-0.903936	-1.03226	0	-0.11341	0.292847	0.277015	1.02639	0.15009	0.771174	0	-0.447902	-0.248656	0.361498	0.410198	0.588461	0.974795
Q0085	Q0085 ... ATP6 protein complex assembly* structural molecule activity* proton-transporting ATP synthase co | Q0092	-1.61606	-0.814513	0.224044	0.495914	-0.0792933	1.16641	0	-1.34565	-1.17557	0.119635	0.31758	-0.660639	0.334004	0	-0.164988	0.270896	-0.485165	0.170808	-0.00618262	0.570138
YER042W	YER042W ... MXR1 response to oxidative stress protein-methionine-S-oxide reductascytoplasm* | YER043C	-1.41323	-0.954202	-0.0705938	0.475575	0.39647	0.709224	0	-0.767907	-0.390478	0.16972	0.613298	-0.267074	0.574773	0	-0.221662	-0.326211	-0.464993	-0.193208	0.0288214	0.734187
YGR192C	YGR192C ... TDH3 glycolysis* glyceraldehyde-3-phosphate dehydrogcytoplasm* | YGR193C	-0.689019	-0.143278	0.0283671	-0.0361695	-0.0892865	-0.110118	0	-0.821067	0.151521	-0.533109	0.192524	0.115155	0.741598	0	-0.034344	-0.179703	0.112037	-0.0444672	0.789698	1.0718
YBR052C	YBR052C … iESR cluster RFS1 biological process unknown molecular function unknown | Protein of unknown function; member of a flavodoxin-like fold protein family that includes Pst2p and Ycp4p; green fluorescent protein (GFP)-fusion protein localizes to the cytoplasm in a punctate patternYBR053C	-0.148113	0.665766	0.167137	0.460021	1.18	0.426889	0	-0.285978	0.483783	-0.256427	0.0798576	0.664652	0.557193	0	0.615858	1.25218	0.78215	0.849088	1.13007	0.808479
YNL067W	YNL067W PAC cluster RPL9B protein biosynthesis structural constituent of ribosome cytosolic large ribosomal subunit ( | YNL067W-A	-0.738248	0.00994252	-0.213818	0.369289	0.405228	0.864808	0	0.121585	0.328914	-0.241069	0.406983	0.386047	0.94782	0	-0.154932	-0.0958624	0.239889	0.547773	0.525613	0.996986
YOR346W	YOR346W ... REV1 DNA repair* DNA-directed DNA polymerase activitnucleus | YOR347C	-0.315595	0.415117	0.955913	-0.0974603	-1.0129	0.446306	0	0.510394	0.518655	1.58397	1.34259	0.152842	1.12815	0	0.0273653	0.415545	1.36745	0.82646	0.0205538	1.65214
YBR137W	YBR137W ... YBR137W biological process unknown molecular function unknown cytoplasm | YBR138C	-0.682948	0.214479	0.817828	0.63296	0.622921	0.262326	0	-0.699332	-0.00072	0.0915178	0.270247	0.193598	0.452773	0	0.32371	0.818074	0.747433	0.816527	-0.14569	0.139079
YDR103W	YDR103W ... STE5 signal transduction during con MAP-kinase scaffold activity cytoplasm* | YDR104C	-0.469128	0.0159045	0.325436	0.723254	-0.29625	0.938106	0	0.0164558	-0.0220932	0.672777	0.73679	0.83734	1.49758	0	-0.431808	-0.064588	0.232523	0.915516	0.837247	1.56204
YIL002W-A	YIL002W-A ... YIL002W-A biological process unknown molecular function unknown cellular component unknown | YIL003W	-0.322108	-0.22211	0.477469	1.02093	0.614188	0.220598	0	0.0692535	0.0752293	0.765946	0.905773	0.0407421	0.25667	0	0.00122792	-0.302056	0.491488	0.594287	0.180477	0.0600989
YPL245W	YPL245W PAC cluster YPL245W biological process unknown molecular function unknown cytoplasm* | YPL246C	-0.295356	0.197463	0.101705	0.138646	0.375002	0.79368	0	0.508832	0.319037	0.530857	0.0929504	0.579255	0.863541	0	0.0503728	0.249005	0.162338	0.657852	0.930746	1.61169
YKL068W-A	YKL068W-A ... YKL068W-A biological process unknown molecular function unknown cellular component unknown | YKL069W	-1.16164	-1.25783	0.132215	0.119158	0.906595	0.928106	0	-0.249871	-0.0852973	0.343187	0.159541	0.0633436	0.511697	0	0.324449	0.0852493	0.398877	0.117849	1.03119	0.937602
YOL031C	YOL031C ... SIL1 SRP-dependent cotranslational molecular function unknown endoplasmic reticulum | YOL032W	0.572477	0.782274	-0.133196	1.05697	-0.188431	0.410437	0	-0.446062	-0.397495	-0.432945	1.12286	0.110389	0.690463	0	0.820538	0.877063	0.598825	0.637848	0.611511	1.11356
YMR006C	YMR006C ... PLB2 glycerophospholipid metabolism lysophospholipase activity cell wall (sensu Fungi)* | YMR007W	-0.609385	-0.0498964	-0.169651	0.0723692	0.0683488	0.905149	0	-0.413299	-0.0074059	-0.614585	0.115896	0.196149	0.797353	0	-0.00666017	-0.17299	0.318361	0.445955	0.26054	1.07154
YOR269W	YOR269W ... PAC1 nuclear migration, microtubule molecular function unknown cytoplasm* | YOR270C	0.194757	0.751175	0.253381	0.875965	0.859262	1.3079	0	-0.0932564	0.341513	-0.017114	0.317313	0.521194	1.3482	0	-0.224491	0.141105	0.460562	0.324589	0.913861	1.49681
YKL044W	YKL044W ... | YKL045W	-0.94419	-1.05145	0.389282	-0.0930006	0.714792	1.21514	0	-0.47099	-0.548207	0.66643	0.6177	0.27885	0.466843	0	-0.86036	-1.13194	0.11288	1.19132	1.15745	1.2716
YMR119W-A	YMR119W-A ... | YMR120C	-0.290272	0.440652	0.519814	0.283969	0.902507	1.77739	0	-0.0852683	-0.223112	-0.416032	0.741689	-0.0672405	1.15555	0	-0.0447845	-0.221885	1.32165	0.874395	-0.299064	1.40089
YHR146W	YHR146W ... CRP1 biological process unknown DNA binding nucleus | YHR147C	-0.732315	-0.468412	-0.377219	0.233576	-0.602965	0.621071	0	-0.822709	-1.24601	0.505146	0.585689	-0.0887737	0.897628	0	-0.267846	0.0238144	0.279644	0.526887	0.0587485	1.23284
YGR155W	YGR155W ... CYS4 cysteine biosynthesis cystathionine beta-synthase activitcytoplasm* | YGR156W	-1.14248	-0.541498	-0.451488	0.307122	0.481845	1.06319	0	-1.03466	-0.710153	-0.9105	-0.111753	0.463955	1.05137	0	0.0127373	0.133112	0.545655	0.309677	1.0137	1.57408
YEL072W	YEL072W ... RMD6 biological process unknown molecular function unknown cellular component unknown | YEL073C	-0.953342	-1.55246	0.216622	0.763137	0.914219	1.57889	0	0.438244	-0.0678338	0.0341951	0.714381	0.789734	1.39002	0	1.2981	1.17528	-0.0298829	0.440374	0.763585	1.40935
YDR502C	YDR502C ... SAM2 methionine metabolism methionine adenosyltransferase acticellular component unknown | YDR503C	-0.168192	0.276413	0.326551	0.597413	1.3844	1.44435	0	-0.557537	-0.0457313	0.243424	0.480267	0.88833	1.21969	0	-0.452756	-0.208073	0.692791	0.818002	0.692241	0.90042
YDR451C	YDR451C ... YHP1 negative regulation of transcr DNA binding* nuclear chromosome | YDR452W	-0.272362	0.0284711	-0.547967	0.407583	0.543249	1.17168	0	0.110374	0.420342	-0.531509	0.723178	1.08023	1.66916	0	0.353988	0.546723	0.327264	0.691905	0.915172	1.38304
YBR068C	YBR068C ... BAP2 amino acid transport amino acid transporter activity plasma membrane | YBR069C	-0.126902	-0.0645942	0.453553	0.378558	0.368236	0.787388	0	-0.536107	-0.162884	-0.309735	-0.570179	-0.615907	-0.112754	0	-0.012194	-0.141186	0.377422	0.207657	0.515445	0.980718
YPR158W	YPR158W … CUR1 biological process unknown molecular function unknown | Protein of unknown function involved in destabilization of [URE3] prions; similar in sequence to Btn2pYPR159C-A	0.0464434	0.46287	1.12742	1.20584	0.163182	1.0196	0	-0.247321	0.0975825	1.23272	0.454201	0.40438	1.20582	0	-0.277043	-0.171153	0.430717	0.0213971	0.473291	1.48528
YEL071W	YEL071W ... DLD3 lactate metabolism D-lactate dehydrogenase (cytochromecytoplasm* | YEL072W	-0.731669	-0.0302852	-0.0730285	0.4127	0.632972	0.912116	0	0.149081	0.525326	-0.63604	0.723204	0.803624	1.26464	0	0.808017	1.1026	-0.0837318	0.14784	0.3051	0.653932
YDR534C	YDR534C ... FIT1 siderophore transport molecular function unknown cell wall (sensu Fungi) | YDR535C	-0.549986	-0.061321	0.142844	-0.409928	-0.391407	1.82985	0	-0.491824	0.221673	-0.290501	-0.50985	-0.010657	0.348198	0	-0.751053	-1.32142	1.66291	0.750406	0.342482	0.66392
YOL038C-A	YOL038C-A ... YOL038C-A biological process unknown molecular function unknown cellular component unknown | YOL038W	-1.60222	-0.829995	-0.245721	1.47661	1.20061	0.385069	0	-0.103481	-0.622208	0.320934	1.25626	0.946274	0.919355	0	-0.0447845	0.807862	0.454915	0.523897	0.692424	0.934568
YLR248W	YLR248W ... RCK2 protein amino acid phosphoryla protein serine/threonine kinase actcytoplasm | YLR249W	-0.703821	-0.200945	0.371564	0.307504	-0.114287	0.592103	0	-0.566102	-0.310514	0.918086	0.208974	0.101082	0.401818	0	-0.0414944	0.360909	0.33015	0.582355	-0.298329	0.350522
YHR049W	YHR049W ... FSH1 biological process unknown serine hydrolase activity cytoplasm* | YHR050W	-0.779891	-0.101235	-0.921657	0.180018	-0.284003	0.639543	0	-0.269614	-0.140953	-1.35216	-0.595474	0.151773	0.864374	0	0.552003	0.277564	1.09638	0.94604	1.61713	2.24442
YNL037C	YNL037C ... IDH1 tricarboxylic acid cycle* isocitrate dehydrogenase (NAD+) actmitochondrial matrix* | YNL038W	-0.288942	-0.0780981	0.251681	0.298998	-0.2265	0.412814	0	-0.0194501	0.663098	0.323672	0.352016	-0.0299462	0.672677	0	0.518897	0.768477	0.590544	0.752704	0.58009	1.26624
YDR046C	YDR046C ... BAP3 amino acid transport amino acid transporter activity mitochondrion* | YDR047W	-0.799617	-0.730803	0.158489	0.366625	0.655542	1.00582	0	-0.0733411	0.138635	-0.547001	0.166804	0.409903	0.923177	0	0.0332783	-0.195582	0.597119	0.442263	0.634125	0.918892
YEL017C-A	YEL017C-A ... PMP2 cation transport molecular function unknown membrane | YEL017W	-0.243016	0.0989725	-0.169737	0.694657	0.454788	1.10142	0	-0.0776166	0.0831556	0.0127895	0.600473	0.622134	1.45386	0	-0.0526589	-0.772372	0.401105	0.394017	1.6848	2.04232
YER062C	YER062C ... HOR2 response to osmotic stress* glycerol-1-phosphatase activity cytoplasm* | YER063W	-0.550927	-0.276511	-0.323054	-0.128401	1.91881	1.70247	0	-0.0566653	0.303245	-0.698676	-0.0275266	1.33103	1.36451	0	0.810319	1.11423	0.445851	0.769623	0.701247	1.04981
YGR055W	YGR055W ... MUP1 sulfur amino acid transport L-methionine porter activity integral to plasma membrane | YGR056W	-1.12465	-1.18372	1.1229	0.668476	0.496658	1.25242	0	-0.295037	0.181607	0.798299	0.634898	0.106209	0.817348	0	0.613198	0.333201	0.45146	0.230658	0.877124	1.53266
YDR214W	YDR214W ... AHA1 response to stress* chaperone activator activity cytoplasm | YDR215C	-0.0064471	0.560634	-0.10851	0.826156	0.00589806	0.510268	0	-0.420533	0.170828	0.010208	0.369212	0.644278	1.099	0	-0.293826	-0.0360408	0.41097	0.254977	0.694693	1.21415
YDR452W	YDR452W ... PPN1 polyphosphate metabolism endopolyphosphatase activity vacuolar membrane | YDR453C	-0.918171	-0.366406	-0.0852912	0.0144698	0.168746	0.691172	0	0.0170945	-0.152246	-0.161459	0.113819	0.252879	0.527668	0	0.572281	0.756666	0.542869	0.584682	0.268323	0.996055
YLL049W	YLL049W … LDB18 biological process unknown molecular function unknown | Protein of unknown function; required for nuclear migration; null mutant shows a reduced affinity for the alcian blue dye suggesting a decreased net negative charge of the cell surfaceYLL050C	-0.696691	-0.457602	0.597205	0.958393	1.14684	0.69837	0	-0.210435	-0.0651683	0.872094	0.399583	0.501793	0.724001	0	-0.317405	-0.526122	0.189914	0.49965	1.19166	0.921078
YJR057W	YJR057W ... CDC8 DNA repair* thymidylate kinase activity* cytoplasm* | YJR058C	-0.0723515	-0.0219468	-0.590369	0.45132	1.09692	1.73091	0	-0.112221	-0.217295	-0.72301	-0.0752451	0.995276	1.16302	0	0.224151	0.109918	-0.347145	-0.263442	0.362816	0.746075
YJL012C	YJL012C ... VTC4 vacuole fusion, non-autophagic molecular function unknown intrinsic to vacuolar membrane | YJL013C	-0.748529	-0.195337	-0.249185	-0.0254977	-0.148724	0.583089	0	-0.105404	0.15156	0.454973	0.381166	0.0637291	0.704474	0	0.320802	0.670596	0.485323	0.678261	0.202084	0.929055
YGR260W	YGR260W ... TNA1 nicotinamide mononucleotide tr nicotinamide mononucleotide permeasmitochondrion* | YGR261C	-1.20427	-0.53333	0.759091	0.292263	0.535045	1.39177	0	-0.162425	0.387178	0.575912	0.479397	0.612817	1.14574	0	0.219741	0.163679	0.0607233	-0.0923612	-0.278373	0.256254
YOR071C	YOR071C … NRT1 transport transporter activity | High-affinity nicotinamide riboside transporter; also transports thiamine with low affinity; shares sequence similarity with Thi7p and Thi72p; proposed to be involved in 5-fluorocytosine sensitivityYOR072W	-0.589745	-0.286414	0.0354606	0.475463	-0.224454	0.945877	0	0.537839	0.78205	0.515404	0.679628	-0.165632	1.00118	0	0.344113	0.294238	0.952415	1.02013	-0.00301471	1.18676
YOL055C	YOL055C ... THI20 thiamin biosynthesis phosphomethylpyrimidine kinase acticellular component unknown | YOL056W	-0.527223	-0.301687	0.395825	0.669608	-0.472444	0.166545	0	-0.46906	-0.457765	1.24098	1.32402	-0.177554	0.192986	0	-0.325306	-0.237898	0.281851	0.64899	-0.20066	0.183295
YBR118W	YBR118W PAC cluster TEF2 translational elongation translation elongation factor activribosome* | YBR119W	-0.704346	0.382111	-0.128402	0.0922938	0.494955	0.67553	0	-0.565058	0.177572	-0.150731	0.273375	0.477786	1.20817	0	-0.0329355	0.312413	0.491281	0.214666	1.29405	1.42816
YCR004C	YCR004C iESR cluster YCP4 biological process unknown electron transporter activity cytoplasm* | YCR005C	-0.494086	-0.110433	0.302642	-0.0111875	0.0758206	0.00363949	0	-0.874337	-0.490304	0.421196	0.0510932	-0.00827042	0.153946	0	0.723284	0.535486	0.646885	0.625027	0.328883	0.625953
YBR089C-A	YBR089C-A ... NHP6B regulation of transcription fr chromatin binding nuclear chromatin* | YBR089W	-0.411015	0.659311	0.271886	0.219483	0.706556	1.5123	0	-1.02833	-0.215617	-0.864258	-0.242437	0.141346	0.979476	0	-0.249018	0.0323559	-0.0475849	0.0396979	0.616475	1.32527
Q0105	Q0105 ... COB aerobic respiration* ubiquinol-cytochrome-c reductase acrespiratory chain complex III (sens | Q0110	-0.280537	0.265567	0.780104	0.944719	0.683319	1.01644	0	-0.320806	-0.511726	0.829279	0.467308	-0.199989	0.225449	0	0.43725	0.930073	0.354685	0.353429	0.738742	0.873592
YCR012W	YCR012W ... PGK1 glycolysis* phosphoglycerate kinase activity cytoplasm* | YCR013C	-0.348518	0.141777	0.581788	0.674095	0.771181	0.486693	0	-0.454635	0.626799	0.634858	1.03763	0.81947	1.15166	0	0.627812	0.668326	0.820917	0.843506	1.38643	1.24354
Cluster_5	#N/A	0	0	0	0	0	0	0	0	0	0	0	0	0	0	0	0	0	0	0	0
YER053C	YER053C iESR cluster PIC2 phosphate transport inorganic phosphate transporter actmitochondrion | YER053C-A	1.49307	1.38614	2.05879	1.67496	2.15291	2.34443	0	1.27021	0.904421	1.55972	1.46812	1.88551	2.15798	0	1.07721	1.06464	1.14356	1.66735	1.17631	1.46723
YGL255W	YGL255W ... ZRT1 high-affinity zinc ion transpo high affinity zinc uptake transportintegral to plasma membrane | YGL256W	-0.136322	-0.0135275	1.76734	-0.274998	0.379828	1.20444	0	0.590534	0.369434	3.37668	0.805192	0.273796	0.887991	0	-1.6983	-1.78281	0.077946	0.201969	-0.172532	0.729624
YKL085W	YKL085W ... MDH1 tricarboxylic acid cycle* L-malate dehydrogenase activity mitochondrial matrix | YKL086W	1.39453	1.58531	2.20258	1.47497	2.12272	2.37621	0	0.855586	0.889908	1.86798	0.986547	1.64375	1.81204	0	1.08371	1.12723	0.857292	1.22964	0.459928	1.00759
YIL015W	YIL015W ... BAR1 protein catabolism aspartic-type endopeptidase activitperiplasmic space (sensu Fungi) | YIL016W	-0.386488	-0.319538	0.0173133	0.561503	-0.538964	1.91558	0	-0.13568	-0.428141	1.19165	1.27774	0.27885	2.17311	0	-1.41402	-1.11497	0.14506	0.559521	-0.631046	1.2716
YIL047C	YIL047C ... SYG1 signal transduction molecular function unknown mitochondrion* | YIL047C-A	-0.250834	-0.0282436	0.307734	-0.204986	0.319664	0.953512	0	0.121681	0.451717	0.832689	-0.077558	0.463829	0.802005	0	-1.04276	-1.22714	-0.311625	-0.21769	0.174723	0.829334
YCR028C	YCR028C ... FEN2 endocytosis* pantothenate transporter activity plasma membrane | YCR028C-A	-0.291933	-0.0985363	0.101878	0.0928274	0.161229	0.601267	0	-0.20366	0.188314	0.176903	0.113705	0.292807	0.28683	0	-0.891804	-1.04131	-0.268085	-0.0631727	0.0626717	0.199845
YLR299W	YLR299W iESR cluster ECM38 glutathione catabolism protein-glutamine gamma-glutamyltraintracellular | YLR300W	-0.348718	-0.0687823	0.278981	0.413946	0.413021	0.325295	0	-0.408552	-0.0695814	0.7145	0.404654	0.543279	0.173947	0	-1.22349	-0.816047	0.214083	0.590465	-0.332183	-0.0286219
YJR049C	YJR049C ... UTR1 iron ion homeostasis* NAD+ kinase activity cytoplasm* | YJR050W	0.227837	0.559917	0.653193	0.632242	0.649139	1.47689	0	0.0549008	0.0991993	0.657969	0.464378	0.448775	1.26025	0	-0.531172	-0.0373458	-0.180035	0.116189	-0.65356	0.424786
YJR111C	YJR111C ... YJR111C biological process unknown molecular function unknown mitochondrion | YJR112W	-0.161036	0.520553	0.888799	0.821843	1.06189	1.48366	0	-0.283082	0.118392	0.773194	0.787257	1.24111	1.79405	0	-1.03329	-0.546526	-0.686838	-0.551237	-0.0253103	0.442234
YDR125C	YDR125C ... ECM18 cell wall organization and bio molecular function unknown mitochondrion | YDR126W	0.147377	0.50572	1.06568	1.03312	1.90015	2.13212	0	0.335307	0.27414	1.13949	0.816651	1.55413	2.11819	0	-0.112956	-0.169418	0.559073	0.74629	0.581948	1.91849
YEL024W	YEL024W ... RIP1 aerobic respiration* ubiquinol-cytochrome-c reductase acrespiratory chain complex III (sens | YEL025C	0.582711	1.05897	1.91885	1.10465	3.10844	2.8831	0	0.104821	1.11919	1.79486	0.491989	2.38166	2.3175	0	0.455645	0.86972	0.991943	1.05639	1.75752	1.93955
YJR109C	YJR109C ... CPA2 arginine biosynthesis carbamoyl-phosphate synthase (glutacarbamoyl-phosphate synthase comple | YJR110W	0.25941	0.799125	0.544212	1.7204	0.23972	0.55058	0	0.471184	0.674404	0.411907	2.08494	1.47369	1.72609	0	-0.853358	-0.524982	-0.755849	-0.0222103	-1.46254	-1.16623
YPL134C	YPL134C ... ODC1 mitochondrial transport intracellular transporter activity*mitochondrion* | YPL135W	0.555129	0.839313	0.798673	0.810731	1.70813	0.946834	0	0.132452	0.502183	0.726926	0.612406	1.063	1.03676	0	-1.43611	-1.27765	0.274343	0.540292	0.106669	-0.237714
YNL234W	YNL234W ... YNL234W response to stress heme binding cytoplasm | YNL235C	0.234285	0.603421	-1.01371	-0.534544	-0.069479	0.274037	0	0.172153	0.146838	0.0591266	-0.354358	0.264977	0.0933845	0	-1.99232	-2.02186	-1.90173	-0.810309	-0.46804	-0.143434
YFR022W	YFR022W ... ROG3 biological process unknown molecular function unknown cellular component unknown | YFR023W	0.863039	0.905098	1.47198	0.653587	1.26852	1.39814	0	0.629246	1.02156	1.78159	0.660769	1.05698	1.1851	0	-0.51609	-0.0567503	0.0878785	0.425532	0.190479	0.410802
YBR182C	YBR182C ... SMP1 positive regulation of transcr transcription factor activity* cytoplasm* | YBR182C-A	0.829395	1.42154	0.843284	1.45257	1.03905	1.27304	0	0.818516	0.892365	0.749027	1.42793	0.92008	1.35811	0	-1.81032	-1.80685	-0.699662	0.134855	-0.276696	0.744539
YDR258C	YDR258C iESR cluster HSP78 response to stress* ATPase activity* mitochondrial matrix | YDR259C	1.1861	1.682	1.80668	1.96409	1.46578	2.10223	0	0.502944	1.21759	2.10305	1.7456	2.09446	2.25044	0	0.143076	0.809901	0.918832	1.29335	0.00702597	0.794968
YGR146C	YGR146C ... YGR146C biological process unknown molecular function unknown cellular component unknown | YGR146C-A	0.672611	1.07833	1.32167	0.690885	1.40887	2.12034	0	0.775312	0.862177	2.0718	0.766034	1.13883	1.61123	0	-0.306028	-0.263863	0.0825961	0.14914	0.198401	1.0056
YLR297W	YLR297W ... YLR297W biological process unknown molecular function unknown vacuole (sensu Fungi) | YLR298C	-0.815575	-0.86771	0.118007	0.237581	0.0441778	-0.0779034	0	-0.43873	0.0162735	0.444145	-0.371001	0.103	0.462369	0	-1.37763	-1.35427	-0.0360433	-0.0945286	0.806922	0.88458
YMR008C	YMR008C ... PLB1 glycerophospholipid metabolism lysophospholipase activity cell wall (sensu Fungi) | YMR009W	0.620654	0.709875	1.41416	1.07122	2.23718	2.9745	0	0.550205	1.01623	1.77786	0.749867	2.00178	2.25737	0	0.163746	0.15681	0.612965	0.793132	0.720584	1.49298
YFL055W	YFL055W ... AGP3 amino acid transport amino acid transporter activity plasma membrane | YFL056C	0.364595	0.876596	0.355009	0.0875716	0.86912	1.22091	0	0.477048	0.933393	0.942422	0.470698	0.927942	1.02627	0	-1.75822	-1.61702	0.521436	0.371894	0.272093	0.815924
YDL183C	YDL183C ... YDL183C biological process unknown molecular function unknown cellular component unknown | YDL184C	0.977584	1.0325	1.15161	0.561503	1.86912	2.12593	0	0.329478	0.709774	1.10089	0.900887	1.4172	1.77101	0	0.156849	0.241515	0.5256	-0.213068	0.41505	1.11743
YIR030C	YIR030C ... DCG1 nitrogen compound metabolism molecular function unknown cellular component unknown | YIR030W-A	-0.699078	0.669931	-0.205079	1.4835	0.526131	1.54097	0	-0.0863263	1.10463	0.999006	1.86532	1.41635	1.73568	0	-0.919254	-0.343447	0.730023	1.39699	0.696119	1.19143
YMR015C	YMR015C ... ERG5 ergosterol biosynthesis C-22 sterol desaturase activity endoplasmic reticulum | YMR016C	-0.611879	-0.347168	-1.24572	-0.497391	-0.391407	0.285533	0	0.130523	0.704669	0.391323	-0.404668	-0.381495	-0.000202	0	-2.92827	-3.20709	0.952415	0.726269	-0.266728	-0.210549
YBR177C	YBR177C ... EHT1 lipid metabolism serine hydrolase activity mitochondrion* | YBR178W	0.798624	1.58016	0.339241	-0.388007	-0.752289	-0.287842	0	1.46423	2.01383	1.07873	0.22429	-0.0710296	0.585144	0	-2.09209	-1.53652	0.247871	0.283608	-0.722007	-0.15642
YKL107W	YKL107W ... YKL107W biological process unknown molecular function unknown cellular component unknown | YKL108W	-0.424071	0.447539	3.01731	1.60881	0.608593	1.0225	0	-0.82534	0.39783	3.63127	1.15673	-0.010657	1.61123	0	-1.68864	-2.45892	1.08992	1.47499	-1.24248	1.07896
YDR525W-A	YDR525W-A ... SNA2 biological process unknown molecular function unknown cytoplasm* | YDR526C	0.208711	0.200329	1.4142	0.764831	1.13534	0.621961	0	0.0994172	0.51173	1.59991	0.839664	0.172789	-0.185234	0	-1.32682	-1.10968	1.29345	0.460122	0.151001	-0.107455
YIL166C	YIL166C ... YIL166C transport transporter activity membrane | YIL169C	0.875831	1.32201	1.88166	1.68872	0.78467	2.44283	0	0.681366	0.557392	1.64434	1.32665	0.715168	0.693695	0	-2.13225	-2.59061	1.0764	0.966841	0.0794474	0.576458
YLR342W	YLR342W ... FKS1 cell wall organization and bio "1,3-beta-glucan synthase activity"actin cortical patch* | YLR342W-A	-0.100608	0.293669	0.199193	0.102342	-0.333812	0.599279	0	0.218183	0.31642	-0.465014	-0.437152	-0.349003	0.0772046	0	-1.11478	-1.26223	-0.400834	-0.345106	-0.930788	-0.0912945
YHR199C	YHR199C … AIM46 biological process unknown molecular function unknown mitochondrion | Putative protein of unknown function; the authentic, non-tagged protein is detected in highly purified mitochondria in high-throughput studies; null mutant displays elevated frequency of mitochondrial genome lossYHR199C-A	-0.189361	-0.0636527	0.56278	0.284618	0.752302	0.316214	0	-0.303184	0.243994	0.65433	0.0896632	0.272471	0.480424	0	-1.23858	-1.14784	0.183256	0.444436	0.14475	0.116886
YOL165C	YOL165C ... AAD15 aldehyde metabolism aryl-alcohol dehydrogenase activitycellular component unknown | YOL166C	-0.155582	0.556473	0.365237	-0.43072	0	0	0	0.384114	0.769799	0.787502	-0.449843	0	0	0	-3.68864	-1.76503	0.399874	-0.515631	0	0
YMR023C	YMR023C ... MSS1 protein biosynthesis* GTP binding mitochondrial inner membrane | YMR024W	-0.577391	-0.00905148	0.370194	0.771239	0.743019	1.34873	0	0.246974	0.290854	0.852785	0.760994	0.886583	1.22228	0	-1.11383	-0.693122	0.0120039	0.8055	-0.220113	0.334797
YIR034C	YIR034C ... LYS1 lysine biosynthesis, aminoadip "saccharopine dehydrogenase (NAD+, L"cytoplasm* | YIR035C	0.305159	0.744156	1.15592	0.729136	1.95813	1.68956	0	0.225042	0.479811	1.01708	2.10225	1.99262	1.7941	0	-1.36671	-1.137	-0.499459	-0.710568	-0.843931	-0.761262
YDL170W	YDL170W ... UGA3 regulation of transcription fr transcription factor activity* nucleus | YDL171C	-0.224849	0.0852048	0.688316	0.750865	0.618222	0.968051	0	-0.13754	-0.125048	0.700065	0.741689	0.898979	1.26133	0	-0.786716	-0.767677	-0.830961	-0.13408	-0.405979	0.193064
YOR311C	YOR311C … DGK1 (HSD1) regulation of transcription molecular function unknown cytoplasm* | Diacylglycerol kinase, localized to the endoplasmic reticulum (ER); overproduction induces enlargement of ER-like membrane structures and suppresses a temperature-sensitive sly1 mutation; contains a CTP transferase domainYOR312C	0.124671	0.303198	0.0227065	0.534145	0.536242	0.904078	0	0.186904	0.286407	-0.148801	0.325056	0.351138	0.978442	0	-0.764368	-0.850483	-0.407841	-0.0690579	0.00801231	0.583302
YPR058W	YPR058W ... YMC1 transport transporter activity mitochondrial inner membrane | YPR059C	-0.734906	0.152083	0.281375	0.556228	0.189318	0.141859	0	-0.324442	0.228762	0.675535	1.02822	0.641804	0.881164	0	-0.737081	-0.592771	-0.632547	-0.440736	-0.149305	-0.30657
YOR285W	YOR285W iESR cluster YOR285W biological process unknown molecular function unknown mitochondrion* | YOR286W	-0.645197	0.0219262	1.67857	0.943182	0.981838	0.543331	0	-0.547023	0.112747	1.23408	0.937216	0.207357	0.0798935	0	-3.65224	-3.24235	0.843004	1.08726	0.127196	-0.0456535
YGL157W	YGL157W ... YGL157W biological process unknown oxidoreductase activity* cytoplasm* | YGL158W	0.371175	1.07103	0.0308281	-0.138631	0.76939	0.912922	0	-0.108279	0.206522	-0.609485	-0.68165	-0.119181	0.102452	0	-2.14969	-2.02914	-0.496974	-0.548172	-0.774836	-0.350095
YIL099W	YIL099W iESR cluster SGA1 sporulation (sensu Fungi)* "glucan 1,4-alpha-glucosidase activi"vacuole (sensu Fungi) | YIL100C-A	0.189197	0.573546	1.23971	1.65051	0.415948	0.674575	0	-0.881923	-0.393037	2.29669	1.45218	-0.332585	0.218915	0	-1.4233	-0.932379	0.454915	1.71982	-0.127003	0.078958
YGL186C	YGL186C ... TPN1 vitamin transport vitamin transporter activity plasma membrane | YGL187C	-0.496731	-0.0843413	0.568917	0.251251	1.10684	1.01087	0	-0.588594	-0.204613	0.248234	-0.140248	0.414265	0.709297	0	-1.12444	-1.21714	-0.379855	-0.526059	0.139495	0.10519
YHR048W	YHR048W … YHK8 drug transport drug transporter activity | Presumed antiporter of the DHA1 family of multidrug resistance transporters; contains 12 predicted transmembrane spans; expression of gene is up-regulated in cells exhibiting reduced susceptibility to azolesYHR049C-A	-0.617699	-0.271052	-0.293685	-0.507539	0.256649	1.04759	0	-0.369875	-0.176038	-0.647596	-0.649281	0.178303	1.0231	0	-1.35871	-1.52126	-0.7028	-0.579496	0.0454	0.709592
YOR303W	YOR303W ... CPA1 arginine biosynthesis carbamoyl-phosphate synthase (glutacarbamoyl-phosphate synthase comple | YOR304C-A	-0.359868	0.312227	1.00532	0.909569	0.612577	1.70876	0	0.167932	0.690145	1.47401	0.94766	0.901162	1.66207	0	-2.35921	-2.32853	-0.793539	-0.323061	-1.00602	0.10691
YBL113C	YBL113C ... YBL113C biological process unknown helicase activity cellular component unknown | YBR001C	-0.924144	0.836581	0	0	-1.12011	-0.322637	0	-1.21391	-0.0711089	0	0	-0.476321	-0.399036	0	-1.14018	-4.39181	0	0	-1.38622	-0.890668
YLR134W	YLR134W PAC cluster PDC5 pyruvate metabolism* pyruvate decarboxylase activity cytoplasm* | YLR135W	0.935128	1.42154	1.3716	1.10055	1.84045	2.86859	0	0.172153	0.318034	0.756645	0.842383	1.57683	2.06022	0	0.578524	0.828103	0.637904	1.02905	1.04487	1.67533
YCR010C	YCR010C ... ADY2 transport* transporter activity* mitochondrion* | YCR011C	0.853463	1.22247	1.01731	0.33911	1.25245	2.34443	0	0.159553	0.847277	1.32093	1.10426	0.211735	1.61123	0	-2.95168	-0.906384	1.12234	1.06704	-0.920553	0.66392
YLR108C	YLR108C ... YLR108C biological process unknown molecular function unknown nucleus | YLR109W	0.952999	2.32201	2.14443	0.777232	2.01298	3.0225	0	0.596124	1.47733	2.38043	0.635489	1.60232	2.14175	0	0.469789	1.14735	1.22805	1.49095	0.79934	2.16642
YLR010C	YLR010C ... TEN1 telomere capping molecular function unknown nuclear telomere cap complex | YLR011W	-0.239646	0.631692	0.861194	0.837834	0.949886	1.60746	0	0.414286	0.695023	1.2214	1.28326	1.11974	1.85815	0	-2.14587	-1.39435	-0.0475849	0.0544121	0.227546	0.564385
YNL268W	YNL268W ... LYP1 basic amino acid transport basic amino acid transporter activimitochondrion* | YNL269W	-0.350419	-0.120166	0.200954	0.117551	-0.263366	0.46959	0	-0.404684	-0.254821	-0.134261	0.0582451	-0.367496	0.19159	0	-1.23259	-1.16048	0.200686	0.114755	-0.382703	0.268669
YOR040W	YOR040W ... GLO4 carbohydrate metabolism hydroxyacylglutathione hydrolase acmitochondrion* | YOR041C	0.421552	0.621568	0.894457	1.39743	1.51548	1.94004	0	0.225142	0.736246	1.13918	1.20636	0.989343	1.26234	0	-0.516853	0.645842	0.425168	1.07971	0.488253	0.872507
YIR028W	YIR028W ... DAL4 allantoin transport allantoin permease activity membrane | YIR029W	-2.07615	-1.99992	-0.982687	-0.853535	0.136972	1.19242	0	-1.1249	-0.737685	2.14196	1.25265	0.748335	1.52877	0	-1.51872	-3.12878	0.274343	0.956857	0.285898	0.493995
YIL087C	YIL087C … AIM19 biological process unknown molecular function unknown | Putative protein of unknown function; the authentic, non-tagged protein is detected in purified mitochondria in high-throughput studies; null mutant displays reduced respiratory growthYIL088C	0.666187	0.7343	1.61014	0.754903	1.59601	1.92034	0	0.0986243	0.365503	1.23819	0.253843	0.525396	1.16582	0	-0.497297	-1.0959	0.388	0.318027	0.0633278	0.693668
YER039C	YER039C ... HVG1 biological process unknown molecular function unknown cellular component unknown | YER039C-A	0.384845	0.322008	1.69539	1.05281	2.22714	1.87336	0	0.277948	-0.0451137	1.87675	0.782331	1.48815	1.05181	0	0.499536	0.570823	0.358407	1.10059	1.25633	0.697868
YPR127W	YPR127W ... YPR127W biological process unknown molecular function unknown cytoplasm* | YPR128C	0.215966	0.979483	1.04937	0.770089	1.56322	1.1666	0	-0.48976	0.0858681	1.19216	0.813168	1.24353	1.51516	0	-1.30976	-0.760202	0.62134	0.663481	0.770695	0.691935
YDL174C	YDL174C ... DLD1 aerobic respiration* D-lactate dehydrogenase (cytochromemitochondrial inner membrane | YDL175C	-0.384305	0.213194	0.387151	-0.34382	-0.427435	0.44978	0	0.0747376	0.253037	1.66443	0.315738	-0.268525	0.544119	0	-0.913318	-0.494818	-0.179945	0.345164	-1.3816	-0.441874
YKL175W	YKL175W ... ZRT3 zinc ion homeostasis* zinc ion transporter activity vacuolar membrane | YKL176C	-0.176473	-0.0603701	0.507853	-0.0121484	0.291519	0.850485	0	-0.185893	0.186122	0.513368	-0.233238	0.162408	0.423915	0	-0.712036	-0.87032	-0.288018	-0.302226	-0.224471	0.367597
YCR106W	YCR106W ... RDS1 response to xenobiotic stimulu DNA binding* nucleus | YCR107W	-0.362282	0.270069	-0.309545	0.176064	-0.00168889	0.738025	0	0.221046	0.33623	0.0323643	0.443806	0.432002	0.980164	0	-1.64981	-1.48778	-0.43569	0.0503029	-0.263078	0.341471
YNR070W	YNR070W … PDR18 transport "ATPase activity, coupled to t | Putative transporter of the ATP-binding cassette (ABC) family, implicated in pleiotropic drug resistance; the authentic, non-tagged protein is detected in highly purified mitochondria in high-throughput studiesYNR071C	0.456348	1.01998	0.234125	-0.011964	2.17532	2.80639	0	-0.365908	0.262315	0.81192	0.469392	0.369374	0.954717	0	-1.36671	-1.24342	-0.864721	-0.302336	-1.11038	-0.875238
YDR234W	YDR234W ... LYS4 lysine biosynthesis, aminoadip homoaconitate hydratase activity mitochondrion* | YDR235W	-0.467788	0.0213869	-0.598758	-0.101314	-0.104413	0.278099	0	-0.088999	-0.0591275	0.26429	1.5014	0.814664	1.1475	0	-0.747725	-0.762486	-0.724756	-0.544912	-0.0848799	0.406215
Q0080	Q0080 … ATP8 (AAP1) | Subunit 8 of the F0 sector of mitochondrial inner membrane F1-F0 ATP synthase, encoded on the mitochondrial genomeQ0085	-1.74215	-1.87064	0.602276	-0.175463	-0.661567	0	0	-2.94702	-1.09383	1.32093	0.589686	0	0	0	-5.13225	-4.54101	-1.04758	-0.326033	0.48736	0
YDR384C	YDR384C ... ATO3 transport* transporter activity mitochondrion* | YDR385W	-1.29333	-0.379444	-1.21589	-0.729207	-0.843919	-0.655573	0	-2.72745	-1.50953	-0.781681	-1.33992	-1.07883	-0.450168	0	-3.69029	-4.20491	-1.68741	-2.17744	-0.694993	-0.551808
YDL198C	YDL198C ... GGC1 iron ion homeostasis* guanine nucleotide transporter actimitochondrial inner membrane | YDL199C	-0.910445	-0.621409	0.558494	1.53641	0.186535	-0.112929	0	-0.547033	-0.0256659	-0.0857644	1.3458	1.29011	1.40478	0	-0.364111	-0.50819	-0.628632	-0.46187	-0.503765	-0.842432
YIR027C	YIR027C ... DAL1 allantoin catabolism allantoinase activity intracellular | YIR028W	-2.68022	-1.10684	-1.56765	-1.17546	-0.909014	0.118714	0	-0.785555	-0.429563	1.11448	0.589686	0.361312	0.782999	0	-2.48536	-1.32142	0.0678923	1.37189	0.384302	0.835687
YMR085W	YMR085W ... YMR085W biological process unknown molecular function unknown cellular component unknown | YMR086C-A	1.3618	1.25274	1.12165	0.200046	1.43302	2.31201	0	0.715423	0.553869	2.18487	0.653251	1.57431	2.31578	0	-0.580837	-0.355637	0.537378	0.844265	0.863719	1.81592
YPL119C	YPL119C ... DBP1 translational initiation* RNA helicase activity cytoplasm | YPL119C-A	0.800996	0.453252	1.55075	0.609524	1.59235	1.5347	0	0.33309	0.307403	2.082	0.626212	1.05254	1.39015	0	-0.366713	-0.747954	0.79195	0.993383	0.521153	0.806432
YCR107W	YCR107W ... AAD3 aldehyde metabolism aryl-alcohol dehydrogenase activitycellular component unknown | YCR108C	-0.630561	0.293993	0.0780673	-0.0770143	-0.069479	1.06224	0	0.0417106	0.253037	-0.000994	0.110765	0.489356	1.12742	0	-2.05041	-1.47111	0.0279661	-0.145398	-0.0867097	0.453123
YER079W	YER079W iESR cluster YER079W biological process unknown molecular function unknown cytoplasm* | YER080W	1.44417	1.60889	1.43463	1.30476	2.90251	2.79814	0	0.330017	0.764815	1.46341	1.25965	2.28137	2.0496	0	1.14209	1.5064	0.848307	1.24967	1.16908	1.25584
YPR124W	YPR124W ... CTR1 copper ion import copper uptake transporter activity plasma membrane | YPR125W	-0.177525	0.389278	-0.0443791	0.405312	0.800242	1.44716	0	-0.181484	0.0665511	-0.17554	-0.0885534	0.60677	0.928574	0	-1.33109	-0.809433	-0.69249	-0.41759	-0.997911	-0.0845408
YLR237W	YLR237W ... THI7 thiamin transport thiamin transporter activity plasma membrane | YLR238W	-2.11368	-1.95925	-0.168838	-0.216393	-1.24041	0.50544	0	-2.2605	-2.06038	0.280899	-0.195146	-0.780227	0.0941743	0	-2.95755	-3.37869	0.454022	0.481929	1.0029	1.99854
YNR043W	YNR043W PAC cluster MVD1 ergosterol biosynthesis* diphosphomevalonate decarboxylase acytosol | YNR044W	-0.655633	0.16188	1.18686	0.774743	1.89828	2.0877	0	-0.692944	-0.0355104	1.14048	0.418072	1.09701	1.37795	0	-0.820361	-0.594385	-0.0840229	0.286371	0.181535	0.431151
YER187W	YER187W ... YER187W biological process unknown molecular function unknown cellular component unknown | YER188C-A	-0.845367	-0.962446	0	0	0.430092	-0.175441	0	0.0467854	-0.0627805	0	0	0.964252	0.695064	0	-2.17407	-1.98439	-1.78752	-1.42207	0.391391	0.408266
YGR023W	YGR023W iESR cluster MTL1 cell wall organization and bio molecular function unknown integral to plasma membrane | YGR024C	0.509658	1.28049	2.27145	0.867723	1.33106	1.60338	0	0.315278	1.05449	2.10993	-0.120083	0.777333	0.885094	0	-0.327423	-0.15036	0.396717	0.595425	-0.127003	0.83294
YJL196C	YJL196C ... ELO1 fatty acid elongation, unsatur fatty acid elongase activity membrane | YJL197W	-1.03647	-0.436961	-0.06953	-0.54804	1.57609	2.54276	0	-0.949075	-0.45745	-0.67017	-0.857303	1.50606	1.9878	0	-3.8561	-3.9263	-0.0776421	-1.19253	1.52452	1.98078
YKL187C	YKL187C ... YKL187C biological process unknown molecular function unknown mitochondrion | YKL188C	0.760354	0.916886	0.747224	1.13974	1.13215	0.730318	0	0.347066	0.419284	0.641454	0.863861	1.222	0.367307	0	-1.40553	-1.37205	0.0542947	0.96058	0.0794474	0.172067
YMR266W	YMR266W ... RSN1 biological process unknown molecular function unknown cellular component unknown | YMR267W	-0.292567	0.347669	-0.371252	-0.755749	0.953217	1.83535	0	-0.35332	-0.0775239	-0.176566	-0.570901	0.55073	1.1165	0	-4.6055	-4.44604	-0.195142	-0.151928	-0.742854	0.162133
YNR050C	YNR050C ... LYS9 lysine biosynthesis, aminoadip "saccharopine dehydrogenase (NADP+,"cytoplasm | YNR051C	-0.332143	0.473567	0.504012	0.638392	1.09478	0.999854	0	-0.256936	0.253968	0.433943	2.55118	0.997412	1.42914	0	-0.333781	0.00825459	-0.21751	-0.234572	0.0701696	0.100088
Q0060	Q0060 ... AI3 biological process unknown endonuclease activity mitochondrion | Q0065	0.379609	1.11111	-0.567649	1.10465	0.685409	1.39922	0	0.558454	0.533342	0.114483	0.897808	1.21703	1.58777	0	-4.17897	-3.42107	-0.825192	1.06704	-0.143829	0.749253
YMR181C	YMR181C iESR cluster YMR181C biological process unknown molecular function unknown cellular component unknown | YMR182C	0.668855	0.877173	1.19956	0.264613	1.79198	2.17946	0	0.37362	0.530906	1.22561	-0.281942	0.892667	1.0244	0	-0.698878	-0.799194	-0.221207	-0.173212	0.220724	0.682536
YIL162W	YIL162W ... SUC2 sucrose catabolism beta-fructofuranosidase activity cytoplasm* | YIL163C	0.305232	0.782164	0.75027	0.712473	2.33442	2.60609	0	0.188573	0.7521	0.698895	0.888275	2.78982	2.65098	0	1.41315	1.50741	0.860163	1.05081	0.502604	0.893492
YLR214W	YLR214W ... FRE1 iron ion transport* ferric-chelate reductase activity plasma membrane | YLR215C	0.512729	0.699764	0.144425	0.400567	0.556706	1.58193	0	0.789172	0.89764	1.05486	0.48824	0.68495	1.41255	0	-1.6201	-1.6756	-0.803659	-0.558565	-0.444115	0.493995
YDR262W	YDR262W ... YDR262W biological process unknown molecular function unknown vacuole (sensu Fungi) | YDR263C	0.235133	0.522147	1.08144	0.961039	1.42683	1.33099	0	-0.0115586	0.501781	1.53635	1.05876	0.800787	0.810233	0	-0.722856	-0.509167	0.350964	0.547925	0.348837	0.387448
YLL042C	YLL042C ... ATG10 protein-vacuolar targeting* ubiquitin-like conjugating enzyme acytoplasm | YLL043W	-0.327109	0.263114	1.66368	2.13387	1.30903	1.20692	0	0.254616	0.814856	1.74223	2.16766	0.989343	1.47373	0	0.675108	0.485934	0.598778	1.60322	1.28108	1.78945
YER069W	YER069W ... ARG5,6 arginine biosynthesis* N-acetyl-gamma-glutamyl-phosphate rmitochondrial matrix | YER070W	-0.702216	0.1823	0.919536	1.01234	0.76548	1.44184	0	0.203464	0.607745	1.299	1.19782	1.40363	1.67402	0	-1.72113	-0.962917	-0.572508	-0.398482	-0.471008	0.215694
YLR267W	YLR267W iESR cluster BOP2 biological process unknown molecular function unknown cellular component unknown | YLR268W	1.05581	0.278939	1.64667	1.46436	1.65489	1.84693	0	-0.0559527	-0.840255	1.98769	1.68698	1.65561	1.68924	0	0.495784	0.467633	0.733775	1.30318	0.877814	1.13785
YOR390W	YOR390W ... YOR390W biological process unknown molecular function unknown cellular component unknown | YOR391C	-0.801525	-0.963395	-0.851442	-0.234356	0	0	0	-1.43524	-1.03819	-0.808349	0.0613068	0	0	0	-1.82906	-1.82546	0.0836596	0.428478	-3.45252	0
YJL163C	YJL163C iESR cluster YJL163C biological process unknown molecular function unknown cellular component unknown | YJL164C	0.115174	0.477286	0.815155	0.520799	1.61262	1.28607	0	-0.184511	0.422492	0.786766	0.396524	1.15207	1.07734	0	-1.06611	-0.708497	0.0600787	0.33898	-0.0638096	0.0124626
YER054C	YER054C ... GIP2 protein amino acid dephosphory protein phosphatase regulator activprotein phosphatase type 1 complex | YER055C	0.62285	1.61151	2.32607	1.29629	2.68541	2.5881	0	0.681013	0.288787	2.13949	0.0316903	1.77594	0.874267	0	0.250671	1.07851	2.07795	1.94165	0.457959	1.10753
YJL088W	YJL088W ... ARG3 arginine biosynthesis* ornithine carbamoyltransferase acticytosol | YJL089W	-0.390552	0.477425	1.17778	2.04616	1.70679	2.04159	0	0.975206	1.46058	2.25901	2.28515	2.30714	2.31869	0	-3.42725	-1.9657	-0.85494	-0.694195	0.41505	0.820018
YGL160W	YGL160W … AIM14 biological process unknown oxidoreductase activity | Putative protein of with similarity to iron/copper reductases (FRE1-8), possibly involved in iron homeostasis; may interact with ribosomes; null mutant displays elevated frequency of mitochondrial genome lossYGL161C	-0.00952649	-0.226004	0.183672	0.156807	0.649339	1.23751	0	-0.203343	0.0527197	0.327332	0.345214	0.699001	1.0769	0	-0.100067	-0.761629	0.548025	0.760748	0.448681	1.03537
YKR097W	YKR097W ... PCK1 gluconeogenesis phosphoenolpyruvate carboxykinase (cytosol | YKR098C	0.54736	0.595768	-0.146185	-0.577561	1.85652	1.8831	0	0.572356	0.701376	1.04963	0.318832	1.55006	1.77834	0	-1.39528	-2.25823	-0.607012	-0.213068	0.564874	0.354592
YML058W-A	YML058W-A ... HUG1 response to DNA damage stimulu molecular function unknown cytoplasm | YML059C	0.371718	0.67567	0.419297	0.272017	0.041763	0.0702784	0	0.551286	1.20526	0.156197	0.209194	-0.654632	0.103128	0	-0.711107	0.0303873	-0.832074	-0.48381	-1.79187	-1.15059
YJR116W	YJR116W ... YJR116W biological process unknown molecular function unknown cellular component unknown | YJR117W	-0.177613	0.0174733	0.194128	-0.511775	0.651591	0.646774	0	-0.153962	0.0527197	-0.0834565	-0.78471	0.329572	0.577633	0	-1.13019	-1.52131	0.461252	0.149502	0.30425	0.677802
YDR391C	YDR391C ... YDR391C biological process unknown molecular function unknown cytoplasm* | YDR392W	0.511746	0.812994	1.18963	0.921182	2.04884	1.57084	0	-0.110749	0.384774	1.11283	0.593014	0.673567	0.948268	0	-0.443004	-0.107408	0.036073	0.302504	-0.283123	-0.181909
YJL171C	YJL171C ... YJL171C biological process unknown molecular function unknown mitochondrion* | YJL172W	0.518811	0.750771	1.65085	1.12463	1.86557	1.87403	0	0.737438	0.974763	1.53896	0.742704	1.27358	1.15837	0	-0.626808	-0.747094	0.401907	0.440239	0.618314	0.773134
YGR286C	YGR286C ... BIO2 biotin biosynthesis biotin synthase activity mitochondrion | YGR287C	-0.0191166	0.491572	1.47305	0.648864	2.08202	2.91105	0	0.817585	0.259611	2.28277	0.891265	1.77297	1.85257	0	-0.438266	-0.514066	-0.140308	-0.140454	0.363479	1.22539
YPL002C	YPL002C ... SNF8 protein-vacuolar targeting* molecular function unknown ESCRT II complex | YPL003W	-0.618158	0.116259	1.5419	1.10325	0.396185	0.553013	0	-0.137762	-0.0756816	1.84963	0.511391	-0.117572	0.486822	0	-0.48219	-0.372536	0.109141	-0.0563427	-0.0151894	0.418047
YJL108C	YJL108C ... PRM10 conjugation with cellular fusi molecular function unknown integral to membrane | YJL109C	-0.264308	-0.0930299	-0.323724	-0.760425	0.889879	3.05812	0	-1.97666	-2.35436	-1.00099	-2.73224	0.141346	1.73409	0	-2.92743	-3.93809	-1.71055	-1.07556	-0.465987	1.07896
YDR497C	YDR497C ... ITR1 myo-inositol transport myo-inositol transporter activity membrane | YDR498C	0.350433	0.846752	1.21037	0.988697	1.9024	2.63438	0	-0.184311	0.161427	0.835111	0.602376	0.904269	1.30937	0	0.390277	0.460066	0.0346331	0.315852	0.082504	0.823484
YPL036W	YPL036W ... PMA2 regulation of pH* "hydrogen-exporting ATPase activity,"plasma membrane | YPL037C	0.289973	0.400541	0.695385	0.239575	0.848059	1.29667	0	-0.0588643	0.0967969	0.76454	0.276397	1.12685	1.49482	0	-1.57272	-1.54465	1.04552	0.806297	0.675057	1.2674
YHR176W	YHR176W ... FMO1 protein folding monooxygenase activity endoplasmic reticulum membrane | YHR177W	0.37975	0.854021	0.950199	1.35436	1.44806	1.9393	0	0.464879	0.313389	0.989607	1.19059	1.02834	1.71518	0	-0.199113	-0.0390213	0.314985	0.972798	-0.065983	0.66392
YHR177W	YHR177W ... YHR177W biological process unknown molecular function unknown cellular component unknown | YHR178W	-0.140111	0.0109679	-1.09231	-0.655456	-0.34778	0.0970455	0	-0.0304176	0.0508107	-0.358546	-0.296932	-0.351694	-0.0181238	0	-2.85214	-2.32142	-1.94571	-0.449136	-1.48042	-0.489703
YKL124W	YKL124W iESR cluster SSH4 biological process unknown molecular function unknown cellular component unknown | YKL125W	0.779463	1.05897	1.28375	1.06521	1.6796	2.14449	0	0.331165	0.797647	1.4854	1.14768	1.50305	1.86362	0	1.13579	1.67334	0.89692	0.96447	0.693093	1.61355
YER052C	YER052C ... HOM3 methionine metabolism* aspartate kinase activity cytoplasm | YER053C	-0.742147	-0.0504903	0.45547	1.58613	0.116297	0.785715	0	-0.350724	0.331247	0.204815	1.83457	1.14784	1.62095	0	0.139166	0.244073	0.0252685	0.143092	-0.531361	-0.0198108
YER060W	YER060W ... FCY21 biological process unknown cytosine-purine permease activity integral to membrane | YER060W-A	0.18042	0.619912	0.329257	0.802935	-0.166976	0.559673	0	-0.118405	0.272755	-0.330596	0.728766	-0.196381	0.515308	0	-0.740698	-1.14563	0.162179	0.31674	0.0300452	0.590998
YNL142W	YNL142W ... MEP2 pseudohyphal growth* ammonium transporter activity plasma membrane | YNL143C	0.184493	0.819507	1.40963	0.532356	1.27156	1.37448	0	0.0225303	0.911818	1.33886	0.287657	0.519858	0.987796	0	-1.7636	-0.957673	0.344733	-0.419519	0.394949	0.918493
YDR506C	YDR506C ... YDR506C biological process unknown molecular function unknown cellular component unknown | YDR507C	0.427778	0.915687	1.43722	1.42244	2.16931	2.46434	0	1.13478	0.557771	2.00872	1.81208	2.95282	2.74143	0	-0.0447845	0.428601	1.15235	1.3054	1.54412	1.51192
YKR039W	YKR039W ... GAP1 amino acid transport* L-proline permease activity* plasma membrane* | YKR040C	0.736895	1.04083	1.58956	0.782102	1.24086	2.25696	0	0.149722	0.865529	2.33604	0.873479	0.869049	1.18673	0	-0.969233	-0.677565	0.511843	0.392653	-0.316481	0.546084
YDR423C	YDR423C ... CAD1 positive regulation of transcr RNA polymerase II transcription faccytoplasm* | YDR424C	0.565744	0.349699	0.330196	0.362556	0.656346	0.971209	0	0.722656	0.367432	0.685506	0.603207	0.424063	0.857671	0	-1.5891	-1.15274	-0.418228	0.232216	-0.422723	0.331345
YOL140W	YOL140W ... ARG8 arginine biosynthesis* acetylornithine transaminase activimitochondrial matrix | YOL141W	-0.906437	-0.104451	-0.397724	0.293054	0.374301	0.635387	0	0.047443	0.225656	0.475262	0.38558	0.671346	0.992731	0	-1.64057	-0.900578	-0.688898	-0.316969	0.0293836	0.46746
YDR276C	YDR276C ... PMP3 cation transport molecular function unknown plasma membrane | YDR277C	0.191965	0.448248	1.15555	0.69437	2.2178	2.33427	0	-0.362056	-0.0135436	1.06208	0.341287	1.55791	1.19338	0	-0.608685	-0.590853	0.307803	0.145725	1.32609	1.11643
YCR054C	YCR054C ... CTR86 biological process unknown molecular function unknown cytoplasm | YCR057C	-0.330555	0.0875424	0.733062	0.765216	0.911905	1.15178	0	-0.433547	-0.307697	0.819837	0.428282	0.431861	0.79886	0	-0.0669802	-0.0360188	-0.00606563	0.32322	-0.0870137	0.68382
YBR241C	YBR241C ... YBR241C biological process unknown molecular function unknown vacuolar membrane (sensu Fungi) | YBR242W	0.621647	0.322008	1.30152	0.350606	1.76493	1.42849	0	0.184644	0.625348	1.7997	0.202169	1.02369	0.763236	0	-1.62975	-1.43412	0.998219	0.861894	-0.273224	-0.24297
YOR349W	YOR349W ... CIN1 post-chaperonin tubulin foldin beta-tubulin binding cellular component unknown | YOR350C	0.307842	0.703212	0.394168	0.3033	0.598961	1.54572	0	0.194892	0.133015	0.21214	0.0505269	0.508845	1.22138	0	-0.856481	-0.91597	-0.136394	0.225053	-0.265985	0.677
YCL026C-B	YCL026C-B ... HBN1 biological process unknown molecular function unknown cytoplasm* | Putative protein of unknown function; similar to bacterial nitroreductases; green fluorescent protein (GFP)-fusion protein localizes to the cytoplasm and nucleus; protein becomes insoluble upon intracellular iron depletionYCL027W	-0.0532332	-0.187006	1.36905	0.852371	2.39964	2.1318	0	0.793425	0.544715	1.09984	1.1908	1.34298	1.19025	0	1.09723	0.697944	-0.0869783	0.146584	1.6996	1.77528
YJL200C	YJL200C … ACO2 biological process unknown aconitate hydratase activity | Putative mitochondrial aconitase isozyme; similarity to Aco1p, an aconitase required for the TCA cycle; expression induced during growth on glucose, by amino acid starvation via Gcn4p, and repressed on ethanolYJL201W	-0.230108	0.634177	-0.0573841	0.838315	0.619635	1.18004	0	0.424853	0.267259	0.713293	2.58555	1.6317	1.96142	0	-0.220103	-0.0405981	-0.676218	-0.37645	-0.289715	0.275067
YNR060W	YNR060W ... FRE4 iron-siderophore transport ferric-chelate reductase activity plasma membrane | YNR061C	-0.0960554	0.308832	-0.513201	0.141394	0.660432	1.77252	0	0.425675	0.465848	0.35746	0.899754	1.31829	1.66838	0	-1.82719	-1.32142	-0.475006	-0.554105	-0.420124	0.319966
YPL188W	YPL188W ... POS5 response to oxidative stress* NADH kinase activity mitochondrial matrix | YPL189C-A	-0.273594	0.221481	0.310876	0.28363	0.734886	1.27671	0	-0.338288	-0.0240269	0.426754	0.247737	0.787709	1.27753	0	-0.371514	-0.284895	-0.0864041	-0.273983	0.204543	0.915178
YOR175C	YOR175C … ALE1 biological process unknown O-acyltransferase activity | Broad-specificity lysophospholipid acyltransferase, part of MBOAT family of membrane-bound O-acyltransferases; key component of Lands cycle; may have role in fatty acid exchange at sn-2 position of mature glycerophospholipidsYOR176W	-0.291197	0.243973	0.605425	0.541007	0.795345	1.57438	0	-0.537167	-0.27895	-0.0416204	-0.0589208	0.485268	1.01859	0	-0.13289	-0.274952	0.0796142	0.109338	0.539543	1.26445
YNL018C	YNL018C ... YNL018C biological process unknown molecular function unknown cellular component unknown | YNL019C	-0.917718	0.338309	0.638802	0.25894	1.62442	1.76793	0	-2.41595	-1.93659	0.427849	-0.250534	0.486843	0.186735	0	-3.04478	-3.45892	-0.163062	-1.51563	-0.83809	-0.83858
YML028W	YML028W ... TSA1 response to oxidative stress* thioredoxin peroxidase activity cytoplasm | YML029W	0.194006	0.69178	0.53923	0.552722	1.02537	1.22851	0	-0.0174868	0.413469	0.462103	0.626778	0.830579	1.19197	0	-0.314187	-0.280807	0.229458	0.23137	0.610619	0.856707
YPL222W	YPL222W ... FMP40 biological process unknown molecular function unknown mitochondrion | YPL223C	0.885885	1.07278	1.61998	1.09082	1.19712	1.64946	0	-0.210927	0.417782	1.71985	0.615449	0.782343	0.755913	0	-0.767251	-0.240501	0.72109	0.926207	-0.203725	0.184568
YPR195C	YPR195C ... | YPR196W	0.0706938	-0.516241	0	1.84062	-0.243254	0.107482	0	-0.270751	-1.02538	-0.372544	1.84062	0	-1.88875	0	-4.142	-4.257	-1.41913	1.78693	-0.0943276	-0.836059
YAL044W-A	YAL044W-A ... YAL044W-A biological process unknown molecular function unknown cellular component unknown | YAL045C	-0.664452	0.0150817	0.124228	0.0905493	0.544417	0.583213	0	-0.348491	0.110498	0.379486	-0.159252	-0.135463	0.439052	0	-1.23826	-0.945231	-0.602974	-0.783203	-0.125778	-0.113687
YGL067W	YGL067W ... NPY1 NADH metabolism NAD+ diphosphatase activity cytoplasm* | YGL068W	0.0955118	0.664895	0.626488	0.640647	0.774554	1.07387	0	-0.0232772	0.0956849	0.0855315	0.295216	0.399027	0.785426	0	-0.781036	-0.713189	0.0389409	-0.196888	0.215331	0.437917
YLR228C	YLR228C ... ECM22 sterol biosynthesis RNA polymerase II transcription facnucleus | YLR229C	-0.320508	0.0405092	0.182688	-0.0109687	-0.178472	0.732291	0	-0.169436	-0.258759	0.326763	0.0827258	-0.0257323	0.587199	0	-1.40347	-1.34666	-0.512136	-0.402729	-0.870444	0.0449105
YGR249W	YGR249W ... MGA1 filamentous growth molecular function unknown cellular component unknown | YGR250C	-1.37982	-0.0156878	0.339241	-1.17546	-1.65444	0.160002	0	-1.61444	-1.03885	-0.416032	-1.58024	-0.917548	0.704342	0	-4.79967	-3.52305	1.27434	-0.213068	-0.127003	1.21646
YPR086W	YPR086W ... SUA7 transcription initiation from general RNA polymerase II transcripnucleoplasm | YPR087W	0.210451	0.736206	0.477469	0.937651	0.314727	1.16525	0	0.189134	-0.0764871	0.423972	0.682156	0.0730009	0.824817	0	-0.512493	-0.121977	-0.100348	-0.0352069	-0.594324	0.536745
YOR302W	YOR302W ... YOR302W regulation of protein biosynth translation regulator activity cytosol | YOR303W	-0.881884	-0.380791	0.656724	0.639148	0.318717	1.23679	0	0.0568639	0.241738	1.37538	1.05886	0.747428	1.26873	0	-3.25856	-3.00895	-1.61874	-1.0375	-1.37832	-0.410246
YPR147C	YPR147C ... YPR147C biological process unknown molecular function unknown cytoplasm | YPR148C	-0.0513092	0.171815	0.248319	0.331716	0.54426	0.776823	0	0.318991	0.313035	-0.103928	0.307047	0.636366	0.727878	0	-0.822014	-0.951399	-0.082561	-0.221946	0.279012	0.313233
YDL048C	YDL048C ... STP4 biological process unknown molecular function unknown cytoplasm* | YDL049C	0.924925	1.12484	1.15961	1.14647	2.12846	2.40655	0	1.48148	1.53424	1.1413	1.12603	2.19343	2.3482	0	-0.27925	-0.097525	0.682326	0.998436	1.21438	1.24246
YCR048W	YCR048W ... ARE1 sterol metabolism sterol O-acyltransferase activity endoplasmic reticulum | YCR049C	0.223373	-0.00751704	-0.0657174	-0.0140212	0.603601	0.456167	0	0.11347	0.0573439	0.21323	-0.482654	0.753537	0.593871	0	-0.913684	-1.3273	-0.0509709	-0.020017	-0.035492	-0.31089
YJR075W	YJR075W ... HOC1 cell wall mannoprotein biosynt "transferase activity, transferring"mannosyltransferase complex | YJR076C	-0.200212	0.360304	0.494431	0.763655	0.65956	1.26833	0	-0.419019	-0.13317	0.384749	0.352647	0.240388	0.754017	0	-0.700093	-0.697614	-0.00825249	-0.09411	-0.176686	0.552522
YJL142C	YJL142C … iESR cluster IRC9 | Dubious open reading frame unlikely to encode a protein, based on available experimental and comparative sequence data; partially overlaps verified gene YJL141C; null mutant displays increased levels of spontaneous Rad52p fociYJL143W	0.982746	2.49193	1.60228	1.30996	2.38995	1.60746	0	1.14044	1.80664	1.6235	1.38323	2.15927	1.61123	0	0.692181	1.00051	0.0678923	2.27236	1.40138	1.40089
YOL122C	YOL122C ... SMF1 manganese ion transport "di-, tri-valent inorganic cation tr"plasma membrane* | YOL123W	0.151751	0.733397	1.74835	1.37838	1.92252	1.59342	0	-0.103626	0.589092	1.66321	0.770071	1.43361	1.5057	0	1.18547	1.25379	0.767632	0.708398	1.36779	1.06995
YCL038C	YCL038C ... ATG22 protein-vacuolar targeting* molecular function unknown integral to membrane* | YCL039W	0.379515	0.454443	1.09002	0.691506	1.53856	1.96003	0	0.396975	0.620598	1.08468	0.552759	1.3077	1.51319	0	0.0933088	-0.115327	0.746666	0.786411	0.92546	1.2453
YGR052W	YGR052W ... FMP48 biological process unknown kinase activity mitochondrion | YGR053C	-2.0905	-0.642659	-0.480186	-1.29945	-0.069479	0.607461	0	-1.31613	-0.988845	0.543326	-2.81971	0.989343	-0.97373	0	-3.703	-4.111	-0.725657	-1.49318	1.07945	-0.921042
YLR004C	YLR004C … THI73 transport transporter activity | Putative plasma membrane permease proposed to be involved in carboxylic acid uptake and repressed by thiamine; substrate of Dbf2p/Mob1p kinase; transcription is altered if mitochondrial dysfunction occursYLR005W	-0.0331954	0.831869	0.959598	1.09662	0.383033	1.58885	0	0.147824	0.645643	1.121	0.949228	0.233269	1.05375	0	-0.775598	-1.13074	-0.260579	0.398861	0.416482	0.804783
YIL073C	YIL073C ... SPO22 meiosis molecular function unknown cellular component unknown | YIL074C	-0.535102	0.20653	-1.20508	0.029357	-0.516938	-1.01932	0	-0.381782	-0.0766684	0.139183	-0.592518	-1.01066	-1.51805	0	-1.99232	-1.2849	-0.452841	0.0941133	-0.435126	0.271603
YGL258W	YGL258W … VEL1 biological process unknown molecular function unknown | Protein of unknown function; highly induced in zinc-depleted conditions and has increased expression in NAP1 deletion mutantsYGL258W-A	-2.56157	-1.99992	-0.620117	-1.21294	1.15291	2.19242	0	-0.918449	-0.322648	0.279114	-0.473324	0.726309	2.61123	0	-2.36671	-1.32142	0.0992565	-0.328545	1.07945	1.88631
YLR361C	YLR361C ... DCR2 biological process unknown molecular function unknown cellular component unknown | YLR361C-A	-0.074324	0.333577	0.853632	0.821649	0.851707	1.56669	0	0.23051	0.353826	0.704687	0.66282	0.918223	1.26317	0	-0.521963	-0.416855	0.34798	0.402348	0.0311674	0.70808
YMR122W-A	YMR122W-A ... YMR122W-A biological process unknown molecular function unknown cytoplasm* | YMR123W	0.257243	0.196605	2.10132	1.10261	2.09306	2.25666	0	0.491085	0.579998	2.38565	0.0218984	1.20812	1.25979	0	0.860641	0.767952	0.731777	0.67644	1.13559	1.47906
YKL043W	YKL043W ... PHD1 pseudohyphal growth specific RNA polymerase II transcrinucleus | YKL044W	-1.13002	-0.526749	0.654743	0.272439	0.278444	0.379715	0	-0.859555	-0.446454	0.75508	0.197368	0.235168	0.501849	0	-1.07032	-0.632711	0.584683	0.855103	-0.175626	0.364712
YER028C	YER028C ... MIG3 negative regulation of transcr DNA binding* nucleus | YER029C	0.298011	0.402626	0.0738968	0.193771	1.05828	0.902204	0	0.619208	0.270582	0.847003	1.39704	0.482383	1.2893	0	-2.29854	-3.12051	-1.36951	-0.710568	-0.975	-0.24297
YNR069C	YNR069C ... BSC5 biological process unknown molecular function unknown cellular component unknown | YNR070W	0.0213138	0.565565	0.0610346	1.06107	-0.135974	0.715175	0	0.361415	1.46323	0.953918	1.48064	1.3946	2.13916	0	-1.4765	-0.376347	-0.369513	0.274726	-0.933609	0.267403
YDR057W	YDR057W ... YOS9 ER to Golgi transport protein transporter activity endoplasmic reticulum | YDR058C	0.0260573	0.408595	0.495015	0.855424	0.827575	1.2875	0	-0.175086	-0.177727	0.466992	0.46266	0.448413	0.703851	0	-0.658893	-0.429481	-0.0252862	0.407598	-0.116039	0.350485
YNL240C	YNL240C ... NAR1 iron-sulfur cluster assembly iron hydrogenase activity cytosol* | YNL241C	0.532775	0.495439	0.19015	0.10392	-0.203714	-0.385349	0	0.520548	0.254395	0.952356	0.0291763	0.566101	0.489908	0	-0.763459	-1.9276	-0.00876565	0.0663142	-0.170015	-0.479982
YOR137C	YOR137C ... SIA1 proton transport molecular function unknown cellular component unknown | YOR138C	1.24864	1.46039	1.6202	1.40757	2.53153	2.92664	0	1.08322	0.950037	1.72693	0.820299	1.6188	1.58699	0	1.09363	1.35119	0.9479	1.14982	1.06485	1.44952
YOL126C	YOL126C ... MDH2 gluconeogenesis* L-malate dehydrogenase activity cytoplasm* | YOL127W	0.233389	0.443866	0.806298	0.0278295	0.615572	1.18669	0	-0.808643	-0.453747	0.726181	-0.78405	-0.438185	0.230143	0	-1.36992	-1.74463	-1.50586	-1.2085	-1.16382	-0.430716
YOL058W	YOL058W ... ARG1 arginine biosynthesis* argininosuccinate synthase activitycytosol | YOL059W	-2.27809	-0.767586	0.389518	1.14042	1.02804	1.11182	0	0.303634	0.988166	0.96329	1.22648	1.80224	1.93876	0	-3.32505	-2.09635	-1.36002	-0.951748	-0.991374	-0.886456
YFR032C-B	YFR032C-B ... YFR032C-B biological process unknown molecular function unknown cellular component unknown | YFR033C	0.596855	1.0325	0.35835	1.24487	1.67595	1.15025	0	-1.18148	-0.212224	-1.00099	0.202663	0.361312	-0.0281775	0	-0.0447845	-0.0666071	-1.14712	-0.493176	0.635841	-0.090967
YOR092W	YOR092W ... ECM3 cell wall organization and bio ATPase activity endoplasmic reticulum | YOR093C	0.704933	0.868477	1.27015	0.831696	2.13768	3.01667	0	1.31124	1.30216	0.977813	1.18443	1.87431	2.46953	0	0.965923	0.825871	-0.0626392	0.436397	0.0794474	0.957652
YGR097W	YGR097W ... ASK10 response to oxidative stress* transcription regulator activity cytoplasm* | YGR098C	0.658474	0.951459	1.35306	0.880936	0.464568	1.38586	0	0.537511	0.252214	1.07416	0.214876	0.334608	0.947106	0	-0.622093	-0.628745	-0.649621	-0.247016	-1.51229	-0.255126
YMR315W-A	YMR315W-A ... YMR315W-A biological process unknown molecular function unknown cellular component unknown | YMR316C-A	-0.409571	1.17	2.98079	1.18711	2.0858	2.36354	0	0.172153	1.04659	2.48443	1.19737	1.25783	1.95227	0	-2.21471	-2.32142	-0.369513	0.680017	1.14358	1.38152
YJR061W	YJR061W ... YJR061W biological process unknown molecular function unknown cellular component unknown | YJR062C	0.53435	0.984973	0.824668	1.01216	1.38995	2.08139	0	1.08755	1.01918	1.32093	1.30729	1.04824	0.7837	0	-0.601178	0.256847	1.0077	1.47499	1.54977	2.17849
YDR530C	YDR530C ... APA2 nucleotide metabolism bis(5'-nucleosyl)-tetraphosphatase cytoplasm* | YDR531W	0.475197	0.939288	-0.05424	-0.141315	1.44049	1.43481	0	0.76866	0.849998	-0.736022	-0.424785	0.730633	1.01848	0	-0.910135	-0.536246	0.197891	0.529932	-0.625397	-0.209167
YKL141W	YKL141W ... SDH3 tricarboxylic acid cycle* succinate dehydrogenase (ubiquinonerespiratory chain complex II (sensu | YKL142W	0.561166	0.51178	0.946874	0.590965	1.26873	1.2185	0	0.223728	0.595678	0.463501	0.0671359	0.741575	0.713398	0	-0.193648	-0.231484	0.0468938	0.0575394	0.248235	0.100332
YMR086W	YMR086W ... YMR086W biological process unknown molecular function unknown cytoplasm | YMR087W	0.432779	0.360596	0.184211	0.382192	0.941792	2.22573	0	0.31037	-0.445022	0.236869	0.0403472	0.910869	1.38629	0	-0.454368	-0.397252	-0.0612598	0.116055	0.0680876	1.23142
YBR162C	YBR162C ... TOS1 biological process unknown molecular function unknown cell wall (sensu Fungi)* | YBR162W-A	-0.495471	-0.505633	-0.0598251	-0.0770759	-0.537535	0.354522	0	0.0859589	0.259045	-0.424462	0.355978	-0.220752	0.385362	0	-1.13556	-1.48607	-0.198456	0.0868748	-0.26486	0.525771
YDL138W	YDL138W ... RGT2 signal transduction* receptor activity* plasma membrane | YDL139C	0.283032	0.286207	0.860912	0.331497	1.44606	2.34728	0	-0.141406	-0.298105	1.07597	-0.0393319	0.603064	1.16896	0	-0.802214	-1.4431	-0.45605	-0.337613	-0.220858	0.610571
YAL061W	YAL061W … iESR cluster BDH2 biological process unknown "oxidoreductase activity, acti | Putative medium-chain alcohol dehydrogenase with similarity to BDH1; transcription induced by constitutively active PDR1 and PDR3; BDH2 is an essential geneYAL062W	-0.994534	-0.517528	-1.375	-2.17546	1.10045	0.0224985	0	-1.47694	-1.00072	-0.0713837	-1.67335	0.448775	0.196195	0	-3.79967	-2.50199	-1.11797	-0.306178	-1.33559	-1.33608
YBR004C	YBR004C ... GPI18 GPI anchor biosynthesis mannosyltransferase activity endoplasmic reticulum | YBR005W	0.304823	0.367418	0.864534	0.132747	0.701159	1.28695	0	0.107786	0.311108	0.716275	-0.166625	0.413909	0.672515	0	-0.796583	-1.08591	-0.46612	-0.297406	-0.403201	0.228825
YOL107W	YOL107W ... YOL107W biological process unknown molecular function unknown Golgi apparatus* | YOL108C	0.328214	0.621035	1.24876	0.7299	1.62633	2.0285	0	0.0533459	0.227342	1.27951	0.381472	1.04824	1.32883	0	0.117022	-0.0693144	-0.0848834	0.0745636	0.284562	0.73431
YGR266W	YGR266W ... YGR266W biological process unknown molecular function unknown mitochondrion* | YGR267C	-0.0172539	0.678493	-0.620117	-0.68361	-0.291871	0.607461	0	-0.0330917	-0.150296	0.320934	-0.503424	0.882428	0.227904	0	-1.82239	-1.72196	-0.607012	-0.306178	0.494485	0.66392
YGL154C	YGL154C ... LYS5 lysine biosynthesis, aminoadip phosphopantetheinyltransferase acticytoplasm | YGL155W	0.000107	0.574195	0.48126	0.788011	1.72826	1.05079	0	0.164692	0.477743	0.558877	0.695619	1.10224	0.922648	0	-1.12007	-0.83137	0.071714	0.212238	0.421367	0.121186
YPL277C	YPL277C ... YPL277C biological process unknown molecular function unknown membrane fraction | YPL278C	0.4019	-0.517528	1.60228	0.180681	1.67375	1.73299	0	0.496588	0.403671	2.10592	0.753184	1.61553	1.05869	0	-0.881286	-1.76503	1.4219	1.18747	0.310773	0.941454
YDR123C	YDR123C ... INO2 positive regulation of transcr specific RNA polymerase II transcrinucleus | YDR124W	0.363695	0.649812	1.35818	1.16959	1.60859	3.01223	0	-0.296961	-0.847245	1.65022	0.646166	0.863335	2.016	0	0.0876658	0.00784904	-0.414702	-0.213068	0.105443	1.55779
YBL055C	YBL055C ... YBL055C biological process unknown molecular function unknown cytoplasm | YBL056W	0.103912	0.401028	0.662397	0.00579786	0.551533	1.29463	0	0.416496	0.392887	0.499699	-0.0428751	0.487636	1.07378	0	-0.980844	-0.73517	-0.445669	-0.328789	-0.0344435	0.837657
YNL254C	YNL254C … RTC4 biological process unknown molecular function unknown | Protein of unknown function; null mutation suppresses cdc13-1 temperature sensitivity; (GFP)-fusion protein localizes to both the cytoplasm and the nucleusYNL255C	0.620176	1.38868	0.889934	1.37708	1.25899	2.16633	0	0.782447	0.517748	1.23296	0.939135	1.11487	1.32946	0	-0.297172	0.0198724	-0.220052	0.589699	0.440195	1.38215
YIL089W	YIL089W ... YIL089W biological process unknown molecular function unknown cellular component unknown | YIL090W	0.212866	1.05136	1.15482	0.824537	1.76702	1.42105	0	-0.00314634	0.751353	1.20064	0.386594	1.18199	1.52103	0	-1.20525	-0.723858	0.630487	0.234391	1.07945	1.20449
YBR008C	YBR008C ... FLR1 response to toxin multidrug transporter activity integral to plasma membrane | YBR009C	0.0943099	-0.0950102	0.541333	0.341251	0.358127	0.929389	0	-0.250196	-0.0490151	1.24527	0.277249	0.113671	1.01027	0	-0.54505	-0.724633	0.297327	0.100264	0.0722159	0.705741
YGL007C-A	YGL007C-A ... YGL007C-A biological process unknown molecular function unknown cellular component unknown | YGL007W	0.677892	0.215092	2.28035	0.883431	0.994651	1.48193	0	-0.181484	0.651357	1.67708	0.589686	0.699836	-0.166375	0	-1.62975	-1.48492	-2.36951	-0.338599	-0.572629	-0.921042
YDR490C	YDR490C ... PKH1 protein amino acid phosphoryla protein kinase activity cytosol | YDR491C	-0.592747	0.140633	0.00433542	0.286323	0.349625	1.3261	0	-0.256331	-0.339286	0.106843	0.123519	0.397967	1.05745	0	-1.39652	-1.20494	0.145598	0.414455	-0.441789	0.594581
YMR153C-A	YMR153C-A ... | YMR153W	-0.409571	0.34848	0.0738968	0.742075	0.0429957	0.989332	0	-0.0783901	-0.170645	0.309346	0.773398	0.172207	0.776292	0	-1.55174	-1.16942	0.0634464	0.732484	-1.22312	0.619526
YOR238W	YOR238W ... YOR238W biological process unknown molecular function unknown cytoplasm | YOR239W	0.503022	1.09307	1.4566	1.54776	1.75011	1.67119	0	-0.146208	0.352235	1.20029	0.970109	0.900685	1.20547	0	-0.372079	0.371763	0.16429	0.392475	0.541482	1.022
YLL056C	YLL056C ... YLL056C biological process unknown molecular function unknown cellular component unknown | YLL057C	-0.640745	-0.194033	0.581214	0.942107	2.30192	2.81707	0	-0.845616	-0.424339	0.901708	1.15945	2.08271	2.05711	0	-2.59378	-2.22703	-0.37475	0.628867	0.473362	0.772531
YGR068C	YGR068C … ART5 biological process unknown molecular function unknown | Protein proposed to regulate the endocytosis of plasma membrane proteins by recruiting the ubiquitin ligase Rsp5p to its target in the plasma membraneYGR069W	0.0573355	0.40001	-0.260988	0.368159	-0.24166	0.154949	0	0.115498	0.56271	0.188483	0.0289708	-0.132913	0.683383	0	-0.75903	-0.514066	0.494565	0.548145	-0.613124	-0.373554
YDL182W	YDL182W ... LYS20 lysine biosynthesis, aminoadip homocitrate synthase activity nucleus* | YDL183C	-0.442861	0.284111	1.31741	1.0361	0.855616	2.13571	0	-0.504729	-0.391035	2.09149	3.25765	1.68449	2.37156	0	-1.066	-0.876636	-0.943116	-1.03942	-0.183587	0.702653
YOL147C	YOL147C ... PEX11 peroxisome organization and bi molecular function unknown peroxisomal membrane | YOL148C	-0.627616	-0.442808	0.416921	0.00212392	0.573956	1.30121	0	-0.646562	-0.209386	0.602269	0.422064	0.148699	0.560419	0	-1.57348	-1.78897	-0.448368	-0.486279	-0.559153	0.177968
YDL215C	YDL215C ... GDH2 nitrogen compound metabolism glutamate dehydrogenase activity mitochondrion* | YDL216C	1.00554	1.27412	1.69247	1.04842	1.74663	2.32153	0	0.972056	0.985582	2.35633	1.15908	1.67171	1.61123	0	0.582133	0.8682	0.75844	1.35965	0.58267	1.26718
YMR316W	YMR316W ... DIA1 pseudohyphal growth* molecular function unknown cytoplasm | YMR317W	0.272	0.744865	1.57604	0.72724	0.681415	1.336	0	0.35053	0.414318	1.45489	0.209082	0.156873	0.81955	0	-1.52632	-1.13074	-0.107291	0.501775	0.0577524	0.872238
YGR066C	YGR066C ... YGR066C biological process unknown molecular function unknown cellular component unknown | YGR067C	0.397784	1.49193	2.22677	0.912	2.59349	2.60746	0	0.233554	0.736246	2.28441	0.759611	0.726309	2.3482	0	-0.407355	0.322435	0.859306	1.10886	0.494485	2.53839
YCR105W	YCR105W ... ADH7 alcohol metabolism alcohol dehydrogenase (NADP+) activsoluble fraction | YCR106W	-0.757045	-0.122777	0.250986	0.029519	0.256097	0.40101	0	-0.563953	-0.571035	0.546493	0.265921	-0.431795	0.182389	0	-1.53417	-1.91376	0.887564	1.03891	-0.366352	-0.0961287
YNL029C	YNL029C ... KTR5 cell wall organization and bio mannosyltransferase activity Golgi apparatus | YNL030W	-0.0122358	0.616628	0.750374	0.930072	1.54025	1.40641	0	0.438244	0.935918	0.389465	0.563691	1.19016	1.38982	0	-0.417443	-0.641941	0.0828117	0.301505	0.900124	0.950225
YLR191W	YLR191W ... PEX13 peroxisome organization and bi protein binding peroxisomal membrane | YLR192C	-0.345955	0.0543118	0.635443	0.64216	1.05605	1.13471	0	-0.439796	-0.735747	0.814327	0.437683	0.513423	0.477966	0	-0.860045	-1.15927	-0.238633	-0.0192964	0.0913215	0.210664
YHR216W	YHR216W PAC cluster IMD2 GTP biosynthesis IMP dehydrogenase activity cytoplasm | YHR217C	-0.211495	0.263643	0.0173133	-0.912428	-1.18802	-0.809104	0	1.06307	1.26813	-1.00099	-1.3172	0.672454	1.19874	0	-2.12516	-1.96806	1.27434	-2.535	-0.939025	0.0229239
YNR064C	YNR064C ... YNR064C response to toxin epoxide hydrolase activity soluble fraction | YNR065C	-0.780215	0.234545	-0.0675756	-3.04053	1.15291	1.0225	0	-0.181484	-0.50322	0.295987	-2.6677	1.40438	1.61123	0	-2.04478	-2.50199	-0.717436	0.0917864	0.494485	0.493995
YMR154C	YMR154C ... RIM13 protein processing cysteine-type endopeptidase activitcellular component unknown | YMR155W	-0.120258	0.370711	0.0346953	0.219946	0.345559	0.861104	0	0.164013	0.38776	0.604227	0.303065	0.440601	0.761128	0	-1.00571	-0.479975	-0.128505	0.249904	-0.388158	0.329654
YKR061W	YKR061W ... KTR2 N-linked glycosylation* mannosyltransferase activity Golgi apparatus | YKR062W	-0.301931	0.342472	2.03598	1.8179	2.79697	2.32068	0	0.341195	0.570437	2.22782	1.16135	1.92641	1.83783	0	0.180508	0.801961	0.634239	0.826102	1.46336	1.47548
YIR020C	YIR020C | YIR020C-B	-0.111639	-0.192566	-0.49726	-0.699025	-0.112548	0.338	0	-0.15204	0.250242	-0.622483	-0.270911	0.0311632	-0.0393181	0	-1.00084	-1.39542	-0.24023	0.511297	-0.307576	-0.090967
YBR151W	YBR151W ... APD1 biological process unknown molecular function unknown cytoplasm* | YBR152W	-0.555148	0.102118	0.889999	0.553998	1.16255	1.41939	0	-0.60592	-0.525758	0.429369	0.00812182	0.512552	0.92028	0	-0.218814	0.141519	0.191914	0.175355	0.278844	0.679862
YHR039C	YHR039C ... MSC7 meiotic recombination molecular function unknown endoplasmic reticulum | YHR039C-A	-0.538943	-0.414958	0.160565	-0.287747	0.724562	0.838749	0	-0.409949	-0.00531727	-0.138186	-0.854697	0.307427	0.213191	0	-0.583172	-0.632122	0.0652533	0.314296	-0.241681	0.0880698
YOR347C	YOR347C ... PYK2 glycolysis* pyruvate kinase activity cytosol | YOR348C	0.732065	1.07574	0.992309	0.886846	2.10045	2.17102	0	0.401922	1.00371	0.771232	0.82868	2.16327	1.89678	0	0.222911	0.581024	0.261395	0.731813	0.478619	0.555668
YLR241W	YLR241W ... YLR241W biological process unknown molecular function unknown cellular component unknown | YLR242C	0.13339	0.724091	0.831926	0.775339	1.13534	1.52525	0	-0.0756227	0.306827	0.566889	0.5059	0.774797	0.860684	0	-0.566401	-0.310921	-0.0325976	0.118969	-0.144984	0.205756
YPR160C-A	YPR160C-A … Dubious Identified by gene-trapping, microarray-based expression analysis, and genome-wide homology searchingYPR160W-A	-0.239646	0.322008	-0.567649	-0.5905	-1.06948	-0.392539	0	-1.18148	0.361851	-0.585957	-2.58024	0.211735	0.196195	0	-3.62975	-3.80685	0.367453	-0.798031	0.0794474	0.248883
YMR246W	YMR246W ... FAA4 lipid metabolism* long-chain-fatty-acid-CoA ligase accytoplasm* | YMR247C	0.0813307	0.762678	0.633426	0.612701	1.03707	1.62923	0	0.445489	0.524238	1.24766	0.891202	1.26175	1.8012	0	-0.828699	-0.74482	0.202758	0.32852	0.666498	1.33082
YJL107C	YJL107C ... YJL107C biological process unknown molecular function unknown cellular component unknown | YJL108C	-0.374998	-0.273151	0.311044	-1.21394	1.0598	2.34443	0	-1.66261	-1.34311	-0.785266	-2.54276	0.287024	0.884251	0	-3.78895	-3.56428	-1.83186	-1.55411	-0.461121	0.633547
YDR107C	YDR107C … TMN2 biological process unknown molecular function unknown | Protein with a role in cellular adhesion and filamentous growth; similar to Emp70p and Tmn3p; member of the evolutionarily conserved Transmembrane Nine family of proteins with nine membrane-spanning segmentsYDR108W	-0.0165783	0.333105	0.49561	0.344523	1.12305	1.61361	0	0.10656	0.400927	-0.238034	0.237672	0.953193	1.36292	0	-0.56681	-0.591235	0.00136518	0.00898241	0.0253517	0.5451
YGR065C	YGR065C ... VHT1 biotin transport biotin transporter activity plasma membrane | YGR066C	-0.627917	-0.178421	1.37252	-0.20649	1.358	1.72375	0	0.860059	0.822538	2.38674	0.0425914	1.09004	0.535569	0	-2.57566	-2.49992	-0.462622	-0.427807	-0.312598	0.329654
YOL030W	YOL030W ... GAS5 biological process unknown "1,3-beta-glucanosyltransferase acti"cell wall (sensu Fungi) | YOL031C	0.378375	0.656009	0.716475	0.576466	1.18829	1.71126	0	0.173814	0.438363	0.233215	-0.00838174	0.641542	1.01689	0	-0.135984	-0.300193	0.574798	0.395741	0.702343	1.16872
YMR244C-A	YMR244C-A ... YMR244C-A biological process unknown molecular function unknown cytoplasm* | YMR244W	0.277753	0.530594	0.565934	0.993614	1.12621	1.978	0	0.572356	0.422311	0.701101	0.690408	0.710627	1.60673	0	-0.359658	-0.0539407	0.0258773	0.274538	-0.272025	0.686219
YDR056C	YDR056C ... YDR056C biological process unknown molecular function unknown endoplasmic reticulum* | YDR057W	0.188623	0.824402	0.725424	1.09284	1.55465	1.7712	0	0.100916	0.0530627	0.0116471	0.660477	0.666112	1.15429	0	-0.337182	-0.329077	0.476322	0.673088	0.825319	1.09266
YLR165C	YLR165C ... PUS5 rRNA modification* pseudouridylate synthase activity mitochondrion | YLR166C	0.253394	0.815048	1.01731	1.09846	0.999234	2.77739	0	1.086	1.31048	0.826825	1.23459	0.801716	2.53406	0	0.55788	0.946059	0.358407	0.90039	0.0438235	2.24888
YOL015W	YOL015W … IRC10 biological process unknown molecular function unknown | Putative protein of unknown function; null mutant displays increased levels of spontaneous Rad52p fociYOL016C	1.05762	1.32201	1.30111	1.52498	1.46434	2.39865	0	0.505729	0.91836	1.72337	1.77026	1.35788	1.94741	0	0.160035	0.863004	0.714255	1.09436	0.0133583	1.31878
YGR282C	YGR282C ... BGL2 cell wall organization and bio "glucan 1,3-beta-glucosidase activit"cell wall (sensu Fungi) | YGR283C	0.393004	0.668635	1.1895	0.850031	1.25114	1.60904	0	0.293374	0.783043	0.827049	0.236731	0.836464	0.97542	0	-0.0729149	-0.140071	0.226781	0.420667	0.501266	0.846225
YDR205W	YDR205W ... MSC2 zinc ion homeostasis cation:cation antiporter activity nucleus* | YDR206W	-0.110294	-0.0812273	0.554181	0.154057	0.197852	0.648998	0	-0.00646592	0.109133	0.560121	0.342479	0.240494	0.457025	0	-0.365505	-0.671217	0.325459	0.30944	-0.124771	0.528894
YLR217W	YLR217W ... | YLR218C	0.475388	0	1.60228	1.33232	0.252449	2.0225	0	-1.18148	-0.599886	2.45844	1.65001	0.574305	0.441308	0	-1.04478	0	-0.0475849	-0.44225	-0.920553	-0.506005
YBR115C	YBR115C ... LYS2 lysine biosynthesis, aminoadip L-aminoadipate-semialdehyde dehydrocytoplasm | YBR116C	0.443669	0.937755	0.903656	0.955388	0.443113	1.395	0	0.360835	0.405946	0.792445	1.75681	0.87501	1.41192	0	-0.930385	-0.739751	-0.816259	-0.450625	-1.14389	-0.360774
YDR410C	YDR410C ... STE14 peptide pheromone maturation protein-S-isoprenylcysteine O-methyendoplasmic reticulum membrane | YDR411C	-0.673062	-0.195841	0.365237	0.495914	0.389953	0.895586	0	-0.154347	0.0808942	0.197786	0.616158	0.290513	0.92402	0	-0.371285	-0.411988	0.193423	0.308169	0.327375	1.10902
YBR054W	YBR054W ... YRO2 biological process unknown molecular function unknown mitochondrion* | YBR055C	0.641709	1.05897	0.695385	0.824537	0.515484	1.82985	0	0.271029	1.33488	2.80636	1.6828	1.57431	1.02627	0	-2.29271	-2.39181	2.21545	3.19292	1.07945	1.66392
YLR251W	YLR251W iESR cluster SYM1 ethanol metabolism molecular function unknown mitochondrial inner membrane | YLR252W	1.02022	0.867004	1.69212	1.38573	3.0539	1.98068	0	0.47748	0.527975	1.17086	0.599084	2.05646	1.12581	0	0.794751	0.462087	0.796544	0.807993	1.68713	1.1196
YNL334C	YNL334C ... SNO2 thiamin biosynthesis* molecular function unknown cellular component unknown | YNL335W	-1.14011	0.177618	0	0	0.930521	0.0224985	0	-1.2884	-0.0711089	-2.39208	0	-0.010657	1.02627	0	-2.28595	-1.74714	0	-3.07323	1.07945	2.93456
YGL222C	YGL222C ... EDC1 deadenylylation-dependent deca mRNA binding cytoplasm | YGL223C	-0.191552	0.205598	0.110423	-0.0586491	1.03288	0.995191	0	-0.0528994	0.0860853	0.275337	-0.487673	0.629801	0.670126	0	-0.357572	-0.242536	0.228746	-0.153479	0.837475	1.09688
YHL008C	YHL008C ... YHL008C biological process unknown transporter activity vacuole (sensu Fungi) | YHL009C	-0.172532	-0.364834	1.46797	1.70906	0.946823	2.19835	0	-0.430843	-0.618849	1.92501	2.28156	0.0845002	0.51931	0	-2.21471	-1.65157	-0.495044	1.61005	0.749299	1.92398
YER034W	YER034W ... YER034W biological process unknown molecular function unknown cytoplasm* | YER035W	0.377025	0.478733	-0.124706	0.0413486	0.797254	1.00601	0	0.251476	0.258368	1.02137	-0.681168	0.361312	0.497576	0	-1.95168	-1.84277	-1.72566	-1.17459	-1.30758	-0.33608
YLL012W	YLL012W ... YEH1 sterol metabolism sterol esterase activity integral to membrane* | YLL013C	-1.07329	-0.556686	-0.49726	-0.703394	-0.0876263	0.0822048	0	-0.503412	-0.00918114	0.442612	-0.194586	0.0249669	0.368376	0	-0.836198	-1.2676	0.330927	1.04219	0.401376	0.736566
YMR063W	YMR063W ... RIM9 sporulation (sensu Fungi) molecular function unknown cellular component unknown | YMR064W	0.0166935	0.20653	0.506351	0.251163	0.402589	1.09289	0	-0.141955	-0.00072	0.0487587	0.246924	0.369047	0.862772	0	-1.08543	-0.892578	-0.295512	-0.542774	-0.0503204	0.636175
YLR121C	YLR121C ... YPS3 protein metabolism aspartic-type endopeptidase activitplasma membrane | YLR122C	0.583889	0.483129	0.997322	-0.0489304	1.24696	1.66153	0	1.30021	1.21154	2.08153	-0.0735019	0.937045	1.29131	0	-0.988931	-1.10737	-0.406378	0.0533019	-1.34169	-0.780099
YPR156C	YPR156C ... TPO3 polyamine transport spermine transporter activity plasma membrane* | YPR157W	-0.137254	0.277614	0.832344	0.0239555	0.339965	1.26145	0	-0.311331	0.01378	0.385324	-0.422815	0.214285	0.875317	0	-0.757126	-0.90775	0.244097	0.0185088	0.34397	1.17639
YNR018W	YNR018W … AIM38 biological process unknown molecular function unknown | Putative protein of unknown function; non-tagged protein is detected in purified mitochondria; null mutant is viable and displays reduced frequency of mitochondrial genome lossYNR019W	0.419317	0.449217	0.495361	0.177553	0.54463	1.68546	0	0.0393584	-0.246131	-0.0534618	-1.29594	-0.718476	0.545644	0	-2.03398	-2.21652	0.211149	-0.0511007	0.674191	1.28059
YBR293W	YBR293W ... VBA2 basic amino acid transport multidrug transporter activity* vacuolar membrane (sensu Fungi) | YBR294W	-0.623987	-0.378432	0.365237	-1.05999	-0.792639	0.63092	0	-0.0912858	0.129782	0.709499	-0.0566773	-0.0528853	0.587386	0	-0.809156	-0.974108	0.814912	0.289432	-0.471245	0.702809
YPR140W	YPR140W ... TAZ1 phospholipid biosynthesis* acyltransferase activity mitochondrion | YPR141C	0.799454	0.847099	0.73352	0.937879	1.73383	1.95324	0	0.865311	0.491394	1.38805	1.21117	1.61154	1.88425	0	0.586972	0.604887	0.908826	1.39027	0.946181	1.53839
YDR344C	YDR344C ... | YDR345C	-0.381665	-0.302483	-0.760294	-0.416471	-0.156942	0.192424	0	-2.01156	-0.962245	-0.778602	-1.37379	-0.638688	1.11373	0	-2.04478	-1.74951	-0.310619	-0.913508	-0.423053	1.60252
YPL264C	YPL264C ... YPL264C biological process unknown molecular function unknown integral to membrane | YPL265W	0.216033	0.423291	1.61935	1.42445	2.54523	2.01345	0	0.571876	0.484707	1.09854	1.49658	2.83065	2.02627	0	-0.589105	-0.388535	0.817486	1.40164	1.01805	0.75703
YFL056C	YFL056C ... AAD6 aldehyde metabolism aryl-alcohol dehydrogenase activitycellular component unknown | YFL057C	1.09997	1.75386	0.751222	1.10077	2.14843	1.99212	0	1.41144	1.7628	0.575462	0.911614	1.18155	1.1962	0	-0.0654686	0.415325	0.526309	0.833382	1.39998	1.22838
YNL320W	YNL320W ... YNL320W biological process unknown molecular function unknown cellular component unknown | YNL321W	0.00753418	0.106452	0.686107	0.696804	0.741965	1.11258	0	0.0577041	0.148599	0.591794	0.613691	0.40915	0.8079	0	-0.349083	-0.63355	0.0309485	0.150846	-0.00921017	0.462039
YLR091W	YLR091W … GEP5 biological process unknown molecular function unknown | Protein of unknown function; detected in highly purified mitochondria in high-throughput studies; null mutant has decreased levels of cardiolipin and phosphatidylethanolamine; not an esssential geneYLR092W	-0.586297	0.0642099	0.0854848	0.317136	0.539937	0.236623	0	-0.441719	-0.290226	0.366737	0.448823	-0.146312	0.189769	0	-1.1767	-0.922872	-0.329356	0.349352	0.236989	0.435102
YJR155W	YJR155W ... AAD10 aldehyde metabolism aryl-alcohol dehydrogenase activitycellular component unknown | YJR156C	1.03791	1.73417	1.02264	1.19575	1.70014	1.65353	0	1.21319	1.5162	0.827318	1.14787	1.40221	0.835448	0	-3.95684	-3.48952	0.718487	1.04018	0.75969	0.676632
YPL147W	YPL147W ... PXA1 fatty acid transport "ATPase activity, coupled to transme"integral to peroxisomal membrane | YPL148C	0.0171291	0.213755	0.572528	0.267667	0.284158	1.75585	0	0.293197	0.0505058	0.632223	0.336345	0.262361	1.14729	0	-0.667715	-0.619645	0.170595	0.530367	0.138341	1.31162
YDL057W	YDL057W ... YDL057W biological process unknown molecular function unknown cellular component unknown | YDL058W	0.712259	0.810294	1.3602	0.910952	1.32284	2.24927	0	0.135707	0.114758	1.81138	0.351374	0.796698	1.58021	0	-0.142632	-0.496993	0.267288	0.105293	-0.198087	0.82815
YEL057C	YEL057C ... YEL057C biological process unknown molecular function unknown cellular component unknown | YEL058W	-0.108402	0.421543	0.557882	0.535031	1.46657	2.60746	0	0.513662	0.0499065	1.29446	1.67457	1.5003	2.02627	0	-1.11517	-1.10641	0.077946	0.649428	-1.43513	-0.795511
YJR098C	YJR098C ... YJR098C biological process unknown molecular function unknown cytoplasm* | YJR099W	0.162168	0.40947	0.314699	0.810991	1.10284	0.796617	0	0.196218	0.40016	0.927747	0.899881	1.12293	1.5102	0	-0.484605	0.0665963	0.116534	0.884669	1.00204	1.28332
YPR157W	YPR157W ... YPR157W biological process unknown molecular function unknown cellular component unknown | YPR158W	-0.12762	-0.0616394	0.00482233	-0.133643	-0.747551	-0.277062	0	-0.988838	-0.155166	-0.000994	-0.450471	-0.586159	0.113733	0	-1.24642	-1.02163	-0.0726759	0.152328	-0.146112	0.42135
YPL060W	YPL060W ... LPE10 mitochondrial magnesium ion tr magnesium ion transporter activity mitochondrial inner membrane | YPL061W	0.447196	0.365951	0.994593	0.913542	1.13757	2.05176	0	0.844669	0.421735	1.45022	0.971556	1.18087	1.54674	0	0.311909	0.233484	0.537378	0.712931	0.278756	1.29797
YPL250C	YPL250C ... ICY2 biological process unknown molecular function unknown cellular component unknown | YPL251W	-0.106752	0.728825	1.71775	1.94672	0.98623	2.07695	0	0.175451	0.800376	2.00401	2.15015	1.75888	2.48906	0	-0.877674	-1.45892	-0.24023	-0.242512	-0.0512562	0.451767
YDR022C	YDR022C ... CIS1 regulation of cyclin dependent molecular function unknown cytoplasm | YDR023W	0.232422	0.980391	1.02473	1.66427	1.74104	1.55925	0	-0.398714	0.405601	1.10645	1.64263	1.08592	1.38432	0	0.00101921	0.71293	0.172681	0.592359	0.449397	0.587422
YGR147C	YGR147C ... NAT2 N-terminal peptidyl-methionine peptide alpha-N-acetyltransferase acytoplasm* | YGR148C	-0.126672	0.54886	0.150815	0.537064	0.817046	0.983795	0	-0.151787	0.077518	-0.165932	0.0353904	0.39324	0.916087	0	-0.877362	-0.676672	-0.117175	-0.133583	0.026706	0.400886
YPR071W	YPR071W ... YPR071W biological process unknown molecular function unknown integral to membrane | YPR072W	0.443381	0.621568	1.0525	1.24419	1.82937	2.07983	0	0.381249	0.516071	1.16695	0.973562	1.15927	1.48924	0	-0.546182	-0.201682	0.0555086	0.164495	0.471765	0.956967
YBR169C	YBR169C iESR cluster SSE2 protein folding molecular function unknown cytoplasm | YBR170C	1.58632	1.81998	2.10236	1.38038	2.27808	2.30418	0	0.523472	1.0038	2.71926	1.38828	2.3167	2.17483	0	0.310228	0.694322	1.39729	1.68851	1.12631	1.50824
YNR061C	YNR061C ... YNR061C biological process unknown molecular function unknown vacuole (sensu Fungi) | YNR062C	0.164811	0.52287	0.823281	0.650552	0.402872	0.517159	0	-0.139922	0.241458	0.267531	0.295936	0.0662261	0.350142	0	-0.893384	-0.918158	0.228978	0.252713	0.253753	0.510115
YOR360C	YOR360C ... PDE2 cAMP-mediated signaling cAMP-specific phosphodiesterase actcytoplasm* | YOR361C	0.264782	0.31561	-0.13276	-0.0499319	0.625967	1.6463	0	0.390671	0.257697	-0.314258	-0.372103	0.750658	1.25817	0	-0.374933	-0.559144	-0.2328	-0.23003	0.136293	0.988926
YMR035W	YMR035W ... IMP2 mitochondrial protein processi peptidase activity* mitochondrial inner membrane peptid | YMR036C	0.106529	1.02433	1.33399	1.02468	1.7206	1.30261	0	0.550583	1.25619	1.37752	1.08814	1.42675	1.3482	0	-0.312718	0.327317	0.27958	0.18903	0.903876	0.557005
YPR031W	YPR031W ... NTO1 biological process unknown molecular function unknown cytoplasm* | YPR032W	-0.216187	0.179989	1.39171	1.58087	-0.866986	0.40101	0	-0.357333	-0.791266	1.12676	1.28712	-0.67692	-0.00287607	0	-1.27508	-1.29905	0.326811	0.643568	-0.227734	0.242457
YPL095C	YPL095C … EEB1 biological process unknown molecular function unknown | Acyl-coenzymeA:ethanol O-acyltransferase responsible for the major part of medium-chain fatty acid ethyl ester biosynthesis during fermentation; possesses short-chain esterase activity; may be involved in lipid metabolism and detoxificationYPL096C-A	0.309464	0.313129	3.03847	2.10727	2.22774	2.93791	0	-1.24811	-1.19294	1.26749	-0.0716276	0.168313	0.556785	0	-2.03454	-1.97899	0.247871	-0.0120811	0.646148	1.01337
YMR306W	YMR306W ... FKS3 biological process unknown "1,3-beta-glucan synthase activity"mitochondrion | YMR307W	0.472228	0.470453	0.665012	0.472826	-0.724343	1.04464	0	0.545498	0.458066	1.22825	0.653012	-0.547685	0.403637	0	-1.11269	-1.05012	0.0151509	1.14177	-0.670574	0.46773
YLR461W	YLR461W ... PAU4 biological process unknown molecular function unknown cellular component unknown | YLR462W	0.138865	-0.110952	-1.56765	0.393158	0.620181	0.640628	0	1.02015	0.414318	-0.585957	0.393158	0.527	0.354893	0	-2.68256	-2.99174	0.689381	-1.79803	0.0321417	-0.347307
YPR026W	YPR026W iESR cluster ATH1 response to stress* "alpha,alpha-trehalase activity" vacuole (sensu Fungi) | YPR027C	1.02248	1.11816	1.76033	0.974488	2.22669	2.75664	0	0.463674	0.734161	1.68036	0.491528	1.83272	1.83708	0	0.990046	1.19055	1.03488	1.33689	0.540039	1.24978
YHR115C	YHR115C ... DMA1 mitotic spindle checkpoint* molecular function unknown cytoplasm | YHR116W	-0.2555	0.292316	0.298726	0.2671	0.426479	1.1196	0	0.0216348	0.237614	0.195806	0.0672074	0.333297	1.01941	0	-0.420933	-0.175442	0.313752	0.246793	0.097826	1.03962
YOR154W	YOR154W … SLP1 biological process unknown molecular function unknown | Integral membrane protein of unknown function; member of the SUN-like family of proteinsYOR155C	0.487335	0.170005	0.648079	0.320065	0.00852353	0.988551	0	-0.206575	-0.737685	1.3116	0.894165	-0.443616	0.184968	0	-1.51045	-1.67756	0.127502	-0.189609	-0.283123	0.675061
YLR081W	YLR081W ... GAL2 galactose metabolism* glucose transporter activity* plasma membrane | YLR082C	0.760354	0.90697	1.18724	0.824537	1.51548	2.0225	0	0.403479	-0.00072	2.80636	2.00472	1.57431	1.61123	0	-1.04478	-1.58446	0.274343	2.10886	1.07945	1.66392
YBR284W	YBR284W ... YBR284W biological process unknown molecular function unknown cellular component unknown | YBR285W	0.774029	0.698384	1.52633	1.21019	2.69348	2.87292	0	0.254018	0.47875	1.63485	1.12378	2.16412	1.98188	0	-0.0585903	0.419008	1.09997	1.31386	1.58964	1.67842
YLL061W	YLL061W ... MMP1 S-methylmethionine transport S-methylmethionine transporter actiplasma membrane | YLL062C	-1.76394	-1.88918	1.37831	1.33355	-0.98008	-0.192096	0	-0.985044	-0.350448	0.555399	0.763715	-0.620537	0.002619	0	-2.25863	-2.45002	1.29122	1.89385	-0.248256	0.956622
YPR149W	YPR149W iESR cluster NCE102 protein secretion molecular function unknown cytoplasm* | YPR150W	-1.41994	-0.985123	-0.739416	-2.19176	0.744108	1.23662	0	-2.13671	-1.66517	-0.808349	-2.18561	0.726309	0.704342	0	-3.84801	-4.22089	0.360073	-1.0023	0.67891	1.3893
YER066W	YER066W … RRT13 biological process unknown molecular function unknown | Putative protein of unknown function; non-essential gene identified in a screen for mutants with decreased levels of rDNA transcriptionYER067W	0.0316557	1.17349	0.721857	0.260636	1.38509	1.8638	0	0.604392	0.584243	0.492046	1.08719	1.16519	1.46368	0	-0.510448	-0.275127	-0.0475849	0.454356	1.41202	1.22192
YLR023C	YLR023C ... IZH3 lipid metabolism* metal ion binding endoplasmic reticulum* | YLR024C	-0.0386592	0.359142	0.619554	0.229855	0.735741	1.4169	0	0.176673	0.34752	0.299923	0.225411	0.510175	1.15013	0	-0.626033	-0.566861	0.181002	0.607849	-0.0649425	0.755663
YCL049C	YCL049C ... YCL049C biological process unknown molecular function unknown membrane fraction | YCL050C	1.04101	1.25203	1.99967	1.50823	3.16756	3.02659	0	0.93633	1.35517	1.59561	1.33241	2.53954	2.73676	0	0.384794	0.515494	1.21712	1.18337	1.57326	1.75908
YMR315W	YMR315W iESR cluster YMR315W biological process unknown molecular function unknown cytoplasm* | YMR315W-A	0.699062	1.04997	1.67777	1.04177	2.72336	2.37627	0	-0.810879	-0.269906	0.782315	0.461066	1.09337	0.722117	0	0.464026	0.792602	0.505227	0.461685	1.00332	0.80034
YGL183C	YGL183C ... MND1 meiotic recombination protein binding* condensed nuclear chromosome | YGL184C	0.875831	0.700519	0.0173133	0.824537	0.515484	4.27043	0	0.18775	-0.00072	2.69945	0.00472325	1.40438	3.61123	0	-3.62975	-3.90638	-1.04758	-0.213068	-0.505515	2.07896
YDR171W	YDR171W iESR cluster HSP42 response to stress* unfolded protein binding cytoplasm* | YDR172W	1.65296	1.86573	1.78351	1.67895	1.47526	2.2774	0	0.388064	0.908133	2.04227	1.02721	1.33898	1.77646	0	0.580045	1.13686	1.08958	1.07678	0.436439	1.4405
YMR170C	YMR170C iESR cluster ALD2 aldehyde metabolism* aldehyde dehydrogenase activity cytoplasm | YMR171C	0.697618	1.005	1.6486	0.886598	1.00231	1.0304	0	0.101871	0.51498	2.09416	0.725747	0.374633	0.647759	0	-1.38214	-1.03371	0.399874	0.671455	0.192658	0.404053
YJR104C	YJR104C iESR cluster SOD1 zinc ion homeostasis* "copper, zinc superoxide dismutase a"cytosol* | YJR105W	-0.000416	0.7317	1.57374	0.699764	1.9744	1.55597	0	-0.231615	0.419644	1.63192	-0.170946	0.927573	1.01689	0	-0.579068	-0.419281	-0.031059	0.080224	0.70623	0.374876
YJR010C-A	YJR010C-A ... SPC1 signal peptide processing molecular function unknown signal peptidase complex | YJR010W	-1.01337	-0.0304453	-0.00777771	0.0418444	-0.0161495	-0.0446157	0	-0.739479	-0.0258105	-0.205533	-0.00240119	-0.282167	0.434735	0	-1.12885	-0.909941	0.153328	0.0224627	0.388034	0.336517
YLR173W	YLR173W ... YLR173W biological process unknown molecular function unknown cellular component unknown | YLR174W	0.0265485	0.723547	0.897404	0.552397	1.83055	2.06028	0	-0.0132469	0.293664	0.827697	0.37448	1.13129	1.38195	0	-0.480214	0.00463495	-0.162693	0.40923	-0.0113815	0.609926
YHR160C	YHR160C ... PEX18 protein-peroxisome targeting protein binding cytosol* | YHR161C	1.84127	1.1845	2.20174	0.786063	2.046	2.0225	0	-1.07457	-1.6528	2.29446	-0.155741	-0.59562	1.2834	0	-2.16026	-2.45892	0.492983	1.32036	0.494485	0.66392
YGL117W	YGL117W ... YGL117W biological process unknown molecular function unknown cellular component unknown | YGL118C	0.571592	1.19142	0.799133	2.03198	0.383979	1.37919	0	0.412524	0.407365	0.375569	2.36191	1.55228	2.30171	0	0.181491	0.277347	0.096805	0.242301	-0.780071	0.0251867
YHR031C	YHR031C ... RRM3 DNA replication DNA helicase activity* nuclear telomeric heterochromatin | YHR032C-A	-0.224849	0.0292259	1.35074	1.27259	0.365907	0.783311	0	-0.226808	-0.386611	0.878711	0.720156	-0.222161	0.231385	0	-0.972272	-0.683465	0.115914	0.412866	0.204978	1.20365
YCR061W	YCR061W iESR cluster YCR061W biological process unknown molecular function unknown cytoplasm | YCR063W	0.719712	1.26147	-1.29463	-1.41153	1.46041	2.12358	0	0.337891	0.820683	-0.55621	-2.26377	0.632551	0.375855	0	-1.8362	-1.72989	-1.51707	-1.21307	-0.970021	-0.0423483
YMR062C	YMR062C ... ECM40 cell wall organization and bio amino-acid N-acetyltransferase actimitochondrial matrix | YMR063W	-0.744438	0.032501	0.75119	1.44373	0.697178	0.516121	0	-0.266372	0.329326	0.636987	1.6126	1.20666	1.29868	0	-0.860177	-0.333912	-0.660789	-0.362572	-0.705582	-0.738389
YOR008C-A	YOR008C-A ... YOR008C-A biological process unknown molecular function unknown cellular component unknown | YOR008W-B	-0.239646	-0.356064	-0.49726	-0.760425	-0.806445	0.607461	0	0.262123	0.754168	-0.73796	-0.165202	0.83734	1.02627	0	-1.22921	-1.54006	0.630487	0.00932424	1.07945	1.40089
YLR428C	YLR428C ... | YLR429W	-1.23965	0.689769	1.1666	-0.0802099	0.515484	0.607461	0	-1.18148	-1.00072	2.26377	0.907331	1.31127	1.83363	0	-0.0447845	0.689769	-1.48326	-1.11782	0.0794474	-0.921042
YLL055W	YLL055W … YCT1 biological process unknown ion transporter activity | High-affinity cysteine-specific transporter with similarity to the Dal5p family of transporters; green fluorescent protein (GFP)-fusion protein localizes to the endoplasmic reticulum; YCT1 is not an essential geneYLL056C	0.0202209	0.585042	0.957812	0.824537	1.16615	1.70839	0	-0.0543717	0.527905	0.77904	0.567909	0.718843	1.26293	0	-0.555746	-0.336851	0.635941	0.419723	0.503763	1.26689
YHR202W	YHR202W ... YHR202W biological process unknown molecular function unknown vacuole (sensu Fungi)* | YHR203C	-0.057808	0.573546	0.372408	0.4709	0.620181	1.56999	0	-0.440218	0.171748	0.80156	0.589686	0.989343	0.910793	0	-0.940949	-0.654845	0.480347	0.94987	0.125251	0.548443
YPR002C-A	YPR002C-A ... | YPR002W	0	0	0.239706	1.14647	0	0	0	0	0	2.69945	1.81208	0	0	0	0	-0.888166	1.17481	0.00932424	0	0
YOL075C	YOL075C ... YOL075C transport "ATPase activity, coupled to transme"membrane | YOL076W	0.758531	1.22247	0.159535	0.292636	0.686346	0.935036	0	0.72249	0.942056	0.90503	0.58274	0.907997	1.07982	0	-1.19841	-1.16222	0.0768625	0.230783	0.240911	0.378897
YIL120W	YIL120W iESR cluster QDR1 multidrug transport multidrug transporter activity* plasma membrane* | YIL121W	-0.0747923	0.494954	1.32071	1.07829	1.40625	1.87336	0	0.220204	0.436267	1.4102	0.763715	0.871986	1.57647	0	-0.956429	-0.894523	0.098266	0.303723	-0.33559	-0.0559716
YLL023C	YLL023C ... YLL023C biological process unknown molecular function unknown endoplasmic reticulum | YLL024C	0.194392	0.439047	1.34594	0.728322	1.38365	1.64291	0	-0.260093	0.404122	1.04035	0.417644	0.665108	0.883013	0	-0.519323	-0.806848	0.792937	0.633047	0.19457	0.858359
YMR003W	YMR003W … AIM34 biological process unknown molecular function unknown | Protein of unknown function; GFP-fusion protein localizes to the mitochondria; null mutant is viable and displays reduced frequency of mitochondrial genome lossYMR004W	-0.281772	0.225146	0.444128	0.297789	0.957657	1.69388	0	-0.925385	-0.581006	0.796189	0.195245	0.492917	1.01285	0	-0.671872	-0.593854	0.0660719	0.0068975	0.21861	1.23096
YPR020W	YPR020W ... ATP20 ATP synthesis coupled proton t structural molecule activity proton-transporting ATP synthase co | YPR021C	0.292849	0.672915	1.15161	1.02093	0.946463	1.74948	0	0.259089	0.65894	1.42281	1.14768	0.428227	1.21268	0	0.00584159	0.0619076	0.784688	0.771825	0.368954	1.3909
YNL101W	YNL101W ... AVT4 neutral amino acid transport neutral amino acid transporter activacuole | YNL102W	0.068985	0.559222	0.403064	0.516222	0.519474	1.34027	0	-0.0215608	0.362333	0.380236	0.301579	0.618901	0.928309	0	-0.515288	-0.385848	-0.147261	0.0470364	0.0874182	0.721568
YDR349C	YDR349C ... YPS7 biological process unknown aspartic-type endopeptidase activitcytoplasm* | YDR350C	-0.59782	-0.218143	0.267622	-0.0208069	0.191786	0.634096	0	-0.373703	0.137703	0.492727	-0.175194	0.134301	0.37366	0	-0.811214	-0.598314	-0.21549	-0.151463	-0.173544	0.346714
YLR411W	YLR411W ... CTR3 copper ion import copper uptake transporter activity integral to plasma membrane | YLR412C-A	-0.239646	0.643936	0.0173133	-0.827539	-0.069479	-1.44506	0	0.210834	0.169205	-0.585957	-0.869746	-0.010657	-0.441287	0	-3.04478	-2.41453	-0.895582	-0.350572	0.0794474	-0.651634
YPL274W	YPL274W ... SAM3 S-adenosylmethionine transport S-adenosylmethionine transporter acplasma membrane | YPL277C	-2.088	-1.87507	1.22428	0.946528	0.480865	1.58438	0	-2.03632	-1.67131	0.165516	0.335113	-0.341668	0.792382	0	-1.31034	-1.30521	1.08782	1.03932	0.985936	1.46425
YPL123C	YPL123C ... RNY1 cellular morphogenesis endoribonuclease activity extracellular region | YPL124W	0.748281	1.38614	1.3526	0.694902	2.54523	2.58728	0	0.87741	0.87375	1.78219	0.589686	1.90991	1.414	0	0.734825	0.989536	0.960779	1.03011	0.930304	0.844493
YPL111W	YPL111W ... CAR1 arginine catabolism to ornithi arginase activity cytosol | YPL112C	0.563873	1.43924	0.262754	0.711475	0.0173048	-0.473789	0	0.0779709	0.561233	-0.690654	0.995024	0.26435	0.704342	0	-0.245882	-0.346172	-0.366238	0.108377	-0.98547	-1.23654
YGR230W	YGR230W ... BNS1 meiosis molecular function unknown cellular component unknown | YGR231C	0.642997	0.623663	0.142844	0.530806	0.0154099	1.50793	0	0.795796	0.455659	-0.138498	0.614777	0.230351	1.16377	0	-1.72286	-1.72532	0.740911	0.239444	-1.64302	0.419995
YIL121W	YIL121W ... QDR2 multidrug transport multidrug efflux pump activity integral to plasma membrane | YIL122W	-1.95585	-1.88515	1.22753	0.142713	0.241802	0.23578	0	-1.47238	-1.65148	0.955937	-0.561624	-0.18224	-0.262421	0	-3.18983	-3.83468	1.03488	0.520145	0.13919	0.0592622
YKL052C	YKL052C ... ASK1 mitotic spindle organization a structural constituent of cytoskelecondensed nuclear chromosome kineto | YKL053C-A	-0.663855	-0.456246	-0.273822	-0.0650388	0.455322	0.403206	0	-0.642974	-0.659921	0.164856	-0.163154	0.465781	0.680942	0	-1.01761	-0.825052	-0.347709	-0.112804	-0.364387	0.30339
YOR378W	YOR378W ... YOR378W biological process unknown molecular function unknown cellular component unknown | YOR379C	0.631071	1.3664	0.246795	1.01718	-0.391407	1.37042	0	0.838981	1.2281	0.388952	1.86979	-0.632145	1.02627	0	-0.650506	-0.540061	0.586287	1.7075	0.0794474	1.37441
YMR169C	YMR169C iESR cluster ALD3 response to stress* aldehyde dehydrogenase activity cytoplasm | YMR170C	0.300922	1.13914	1.05166	0.233792	1.40001	1.60746	0	-0.0360531	0.379553	1.33133	-0.140882	0.873866	0.814766	0	-0.307819	0.045595	0.496239	0.715965	0.186363	1.01184
YLR231C	YLR231C ... BNA5 NAD biosynthesis kynureninase activity cytoplasm* | YLR232W	0.0359882	0.364072	0.866447	0.558257	2.03087	2.29099	0	0.00429025	0.675217	1.33519	0.921307	1.75056	1.82108	0	-1.32309	-0.87681	0.658354	0.987155	1.25209	1.10065
YGR182C	YGR182C ... | YGR183C	1.13887	0.478127	2.31687	0.808418	2.50277	2.48193	0	1.64634	0.99928	2.47848	0.834798	1.69561	2.3482	0	0.842741	0.394786	1.00686	1.23759	0.918983	1.07896
YOR284W	YOR284W ... HUA2 actin cortical patch assembly molecular function unknown cytoplasm | YOR285W	0.115449	0.638035	-0.407993	1.30098	0.178449	0.907021	0	0.479715	0.191926	0.594164	1.69061	-0.347692	0.969687	0	-0.341766	0.113718	-0.39272	0.433295	-0.647534	0.465981
YKL094W	YKL094W ... YJU3 biological process unknown serine hydrolase activity cytoplasm* | YKL095W	-0.194654	0.399902	0.365485	0.423628	0.988753	1.53493	0	-0.0870116	0.144598	0.464128	0.153993	0.462251	1.17265	0	-0.868067	-0.408387	-0.139301	-0.0413241	0.0397937	0.82528
YKR030W	YKR030W ... GMH1 transport molecular function unknown integral to Golgi membrane | YKR031C	-0.28634	0.312177	0.284042	0.427755	0.68511	1.09373	0	-0.28299	-0.0354252	0.291334	0.281203	0.494212	1.03069	0	-0.60244	-0.616654	-0.134493	0.156688	0.103426	0.606747
YPR002W	YPR002W ... PDH1 propionate metabolism molecular function unknown cytoplasm* | YPR003C	0.689964	1.66596	1.27257	1.31328	1.42529	2.37614	0	0.380395	1.50829	1.61466	2.10581	2.20234	2.47106	0	1.44554	2.25426	0.726139	1.50516	1.478	2.28407
YKL084W	YKL084W ... HOT13 mitochondrial intermembrane sp molecular function unknown mitochondrial intermembrane space | YKL085W	-0.400638	0.202426	0.202869	0.34102	0.263565	0.49538	0	-0.302947	0.347204	0.496505	0.737862	0.0208786	0.768473	0	-1.67526	-1.7865	-0.530186	-0.451473	-0.692478	-0.573119
YGL045W	YGL045W ... RIM8 meiosis* molecular function unknown cellular component unknown | YGL047W	0.689762	1.5099	1.70277	1.33049	1.94303	2.54697	0	0.231526	0.738414	1.43674	0.775675	1.10978	1.5102	0	-1.23512	-0.159958	-0.0638255	0.518014	-0.830137	0.379824
YMR073C	YMR073C … IRC21 biological process unknown molecular function unknown | Putative protein of unknown function; proposed to be involved in resistance to carboplatin and cisplatin; shares similarity to a human cytochrome oxidoreductase; null mutant displays increased levels of spontaneous Rad52p fociYMR074C	-0.0198651	0.450838	0.352049	0.661038	0.506793	0.893643	0	0.334915	0.676361	0.498801	0.401241	0.149123	0.846611	0	-0.63432	-0.765821	0.0671853	0.227504	-0.438844	0.397229
YCL039W	YCL039W ... GID7 negative regulation of glucone molecular function unknown cytoplasm* | YCL040W	0.272364	0.280187	0.359705	0.367468	0.161229	0.603868	0	0.281823	0.00750095	0.846287	0.327732	0.205766	0.415508	0	-0.593915	-0.496508	0.232523	0.636129	-0.515977	-0.218947
YOR274W	YOR274W ... MOD5 tRNA modification tRNA isopentenyltransferase activitnucleus* | YOR275C	-0.111541	0.848444	1.17998	1.059	1.11374	2.0424	0	-0.244677	-0.125048	1.33021	0.177788	0.0978674	0.356191	0	-1.12967	-0.558224	-1.09489	-0.545644	-0.210894	0.416828
YNL195C	YNL195C iESR cluster YNL195C biological process unknown molecular function unknown mitochondrion | YNL196C	0.915632	1.49396	1.45027	0.178174	2.27291	2.26351	0	-0.0262054	0.324856	1.72147	0.227116	0.989343	0.374194	0	-3.50422	-2.98135	0.800412	0.201969	-0.142945	0.426881
YDR453C	YDR453C iESR cluster TSA2 regulation of cell redox homeo thioredoxin peroxidase activity nucleus | YDR454C	-0.0715735	0.30796	1.49805	0.795974	2.21928	1.43952	0	-0.573385	-0.0635796	1.43202	0.302296	1.4428	1.15379	0	-0.130582	0.222899	0.651361	0.618238	0.0245492	-0.139791
YDR492W	YDR492W ... IZH1 lipid metabolism* metal ion binding endoplasmic reticulum* | YDR493W	-1.50857	-1.07307	-0.876892	-1.57882	-0.82012	-0.231819	0	-1.66795	-1.53409	-0.629739	-1.48246	-0.471791	-0.0952917	0	-3.89244	-4.77906	-1.21359	-1.35145	0.0239523	0.163847
YFR055W	YFR055W … IRC7 sulfur metabolism* cystathionine beta-lyase activ | Putative cystathionine beta-lyase; involved in copper ion homeostasis and sulfur metabolism; null mutant displays increased levels of spontaneous Rad52p foci; expression induced by nitrogen limitation in a GLN3, GAT1-dependent mannerYFR056C	-0.279292	0.484397	-0.358386	0.49635	-0.188778	0.166888	0	-0.665431	-0.13789	-0.510549	0.3279	-0.455442	0.0966596	0	-3.14659	-2.64446	-0.73838	-0.549117	-0.419785	0.112729
YAR027W	YAR027W ... UIP3 biological process unknown molecular function unknown nuclear membrane | YAR028W	0.00559882	0.314059	0.121947	0.167105	0.254465	-0.0229445	0	0.106093	0.24303	-0.213843	-0.244244	-0.0937128	0.204868	0	-3.59619	-2.77937	-0.39203	-0.343521	-0.137909	0.021927
YBR291C	YBR291C ... CTP1 mitochondrial citrate transpor tricarboxylate carrier activity mitochondrial inner membrane | YBR292C	-0.271827	0.388734	-0.41634	-0.0644315	0.502427	0.578892	0	0.00717799	-0.144211	0.144056	1.50654	0.61278	1.05151	0	-1.40433	-1.19092	-0.94067	-0.506427	-0.130006	0.411034
YNR068C	YNR068C ... YNR068C biological process unknown molecular function unknown cellular component unknown | YNR069C	-0.0952564	0.85544	0.27257	1.4709	-0.531822	0.664045	0	0.555482	1.4656	1.41985	1.51458	1.62011	2.02627	0	-0.790212	-0.723858	-0.301341	0.620922	-0.874749	0.107527
YAL053W	YAL053W … FLC2 biological process unknown molecular function unknown | Putative FAD transporter; required for uptake of FAD into endoplasmic reticulum; involved in cell wall maintenanceYAL054C	0.23004	0.338584	1.53023	0.126375	0.747075	1.1816	0	0.0360838	0.275591	1.82023	-0.536918	0.268333	0.336772	0	-0.771351	-0.76792	-0.137446	-0.0299743	-0.387604	0.280155
YIL040W	YIL040W ... APQ12 mRNA-nucleus export molecular function unknown endoplasmic reticulum* | YIL041W	0.114784	0.396727	0.590871	0.294023	0.653867	1.42689	0	-0.139489	0.0183262	0.453264	0.165188	0.603064	1.10873	0	-0.773656	-1.2906	0.0930134	-0.252778	0.0201503	0.66392
YOR176W	YOR176W ... HEM15 heme biosynthesis ferrochelatase activity mitochondrial inner membrane | YOR177C	0.681631	1.17693	1.60796	1.16668	1.61034	2.08693	0	0.0866002	0.202716	0.914744	0.52075	0.87148	1.33675	0	-0.0381378	-0.122831	0.150447	0.0283541	0.379319	0.918969
YDL037C	YDL037C ... BSC1 biological process unknown molecular function unknown cellular component unknown | YDL039C	-0.873518	0.20653	-0.567649	-0.175463	-0.610047	-0.158074	0	-1.28102	0.298841	0.414043	-0.410314	-0.688729	-0.97373	0	-2.53664	-1.89258	0.689381	0.487372	0.96209	0.922232
YDL131W	YDL131W ... LYS21 lysine biosynthesis, aminoadip homocitrate synthase activity nucleus | YDL132W	0.56503	1.16433	0.915843	1.1515	1.56684	2.02927	0	0.31461	0.408843	0.873305	1.72433	1.22345	1.62376	0	-0.17202	0.0275753	-0.619542	-0.246636	-0.398254	0.208612
YDR513W	YDR513W … iESR cluster GRX2 (TTR1) mRNA-nucleus export* DNA binding* nucleus* | Cytoplasmic glutaredoxin, thioltransferase, glutathione-dependent disulfide oxidoreductase involved in maintaining redox state of target proteins, also exhibits glutathione peroxidase activity, expression induced in response to stressYDR514C	0.219785	0.392112	1.77103	0.836063	2.28033	1.63018	0	-0.139173	0.0112036	1.12014	0.388566	0.944674	0.550429	0	-0.0533976	-0.0794923	0.687273	0.424913	1.22969	0.807656
YNL092W	YNL092W ... YNL092W biological process unknown S-adenosylmethionine-dependent methcellular component unknown | YNL093W	1.34532	1.535	0.815679	0.754148	1.90453	2.31201	0	0.865822	0.669132	1.21691	1.0218	1.50392	1.94381	0	1.11441	1.08023	0.473247	1.3833	0.316487	1.58146
YIL055C	YIL055C ... YIL055C biological process unknown molecular function unknown cellular component unknown | YIL056W	1.03536	0.655431	1.16541	0.225075	0.500377	1.59404	0	0.634092	0.525349	2.2074	0.646269	0.0554322	0.763236	0	-1.16508	-1.05839	0.673699	0.91126	-0.63515	0.230961
YOL059W	YOL059W ... GPD2 glycerol metabolism glycerol-3-phosphate dehydrogenase mitochondrion* | YOL060C	-0.643331	-0.222036	-0.0262575	0.0681623	-0.348159	0.442185	0	-1.05035	-0.694482	-0.0399163	0.133963	-0.156924	0.685233	0	-1.76333	-2.12427	-1.21506	-1.27916	-1.46227	-0.580608
YNR019W	YNR019W ... ARE2 sterol metabolism sterol O-acyltransferase activity endoplasmic reticulum | YNR020C	0.506508	0.403859	1.05873	0.437928	0.575965	0.92372	0	-0.613521	-0.408452	1.28979	-0.191001	-0.421289	-0.0839126	0	-1.47682	-2.11375	0.00738156	0.3133	-0.204921	0.148
YFL041W	YFL041W ... FET5 iron ion transport ferroxidase activity vacuolar membrane (sensu Fungi) | YFL041W-A	-0.0116005	0.559775	0.830753	0.676946	0.965617	1.10085	0	-0.154291	0.282214	0.488897	0.438419	0.369992	0.684905	0	-0.383586	-0.115221	0.143993	0.202522	-0.00319645	0.320472
YAL067C	YAL067C ... SEO1 transport transporter activity membrane | YAL067W-A	-1.17927	-0.0341362	0.623034	0.847621	1.44148	1.97467	0	0.525581	0.953477	1.51984	1.27935	2.4223	2.86026	0	-2.66722	-2.91203	0.0727093	-0.0798017	0.966973	1.10998
YKR044W	YKR044W ... UIP5 biological process unknown molecular function unknown nuclear membrane | YKR045C	-0.310468	0.374795	0.202231	0.580053	0.545231	1.08193	0	-0.17287	-0.131964	-0.025869	0.35022	0.143148	0.831698	0	-1.42849	-0.904145	-0.987212	-0.472712	-0.448065	0.56631
YPL052W	YPL052W ... OAZ1 protein catabolism enzyme inhibitor activity cell | YPL053C	-0.620736	0.67195	1.58956	1.06877	1.7139	2.25827	0	0.277948	0.456138	1.83854	0.818069	0.723531	1.41759	0	0.102057	0.234972	-0.341316	-0.0922138	0.160367	1.0579
YNL116W	YNL116W ... DMA2 mitotic spindle checkpoint* molecular function unknown cytoplasm | YNL117W	-0.0392873	0.282479	0.186751	-0.221004	0.819902	1.18621	0	-0.155663	-0.112951	0.858649	-0.00345068	0.829686	1.06364	0	-0.947204	-0.821923	-0.133404	-0.0807609	0.0656416	0.357189
YML075C	YML075C ... HMG1 ergosterol biosynthesis hydroxymethylglutaryl-CoA reductaseendoplasmic reticulum membrane* | YML076C	-0.818382	-0.41575	-0.61293	-1.1485	-1.57727	-0.94912	0	-0.581622	-0.0763473	-0.0673368	-0.753571	-0.846026	-0.553923	0	-2.45153	-2.66008	-0.468036	-0.537266	-0.209179	0.340399
YGL055W	YGL055W ... OLE1 mitochondrion inheritance* stearoyl-CoA 9-desaturase activity endoplasmic reticulum membrane | YGL056C	-0.0461928	0.325532	1.07769	0.438915	1.4288	2.17608	0	0.0575401	0.208647	1.27446	0.204507	0.987061	1.34957	0	-0.917013	-1.1142	0.189545	0.417699	0.608304	1.28312
YHR028C	YHR028C ... DAP2 protein processing dipeptidyl-peptidase and tripeptidyvacuolar membrane (sensu Fungi) | YHR028W-A	-0.376098	0.0395034	0.573363	0.585005	0.696603	1.07276	0	-0.241912	-0.135776	0.40435	0.21753	0.24304	0.461007	0	-0.2478	-0.00854618	0.302688	0.469773	-0.000936	0.59186
YER026C	YER026C ... CHO1 phosphatidylserine biosynthesi CDP-diacylglycerol-serine O-phosphaendoplasmic reticulum | YER027C	0.436315	0.8925	1.7084	1.49039	1.70133	1.87581	0	-0.360931	0.153442	1.34785	0.966546	0.692396	1.0375	0	-0.142513	-0.208272	0.398772	0.382842	0.791424	0.964654
YLR446W	YLR446W ... YLR446W biological process unknown molecular function unknown cellular component unknown | YLR447C	1.14396	1.53943	1.30682	1.29438	1.98637	2.53461	0	0.318087	0.823913	1.11231	1.11823	1.15645	1.6543	0	0.253739	0.532358	0.456578	0.684429	0.53196	1.48989
YDL086W	YDL086W ... YDL086W biological process unknown carboxymethylenebutenolidase activicytoplasm* | YDL087C	-0.00615615	0.338783	1.14037	0.446836	1.22003	0.23899	0	-0.690497	0.14367	0.907213	0.399355	0.841786	0.356419	0	-0.86192	-0.862757	0.669481	0.659927	0.690882	0.29545
YDR529C	YDR529C ... QCR7 aerobic respiration* ubiquinol-cytochrome-c reductase acrespiratory chain complex III (sens | YDR530C	0.0670151	0.944445	2.01731	1.86816	2.17845	2.14224	0	0.312056	0.728633	2.05244	0.844259	1.39144	1.43436	0	-0.434731	-0.0186018	1.03185	1.46974	0.557495	0.948374
YPR098C	YPR098C iESR cluster YPR098C biological process unknown molecular function unknown mitochondrion | YPR099C	0.157013	0.00598014	0.849191	0.398611	2.02202	1.6959	0	0.187161	0.519754	1.54497	0.534403	1.90991	1.27681	0	0.918221	0.453474	0.71795	1.07595	1.4286	1.13984
YGR149W	YGR149W iESR cluster YGR149W biological process unknown molecular function unknown integral to membrane | YGR150C	0.487438	0.879033	1.76486	0.721159	2.15261	2.65375	0	0.365227	0.281944	1.60314	-0.0389037	1.40385	1.20116	0	-0.0497168	-0.158099	0.150478	0.289793	0.276844	0.742395
Cluster_6	#N/A	0	0	0	0	0	0	0	0	0	0	0	0	0	0	0	0	0	0	0	0
YPL230W	YPL230W … iESR cluster USV1 biological process unknown molecular function unknown | Putative transcription factor containing a C2H2 zinc finger; mutation affects transcriptional regulation of genes involved in growth on non-fermentable carbon sources, response to salt stress and cell wall biosynthesisYPL231W	0.866663	0.94216	1.90484	0.556048	3.68541	3.62736	0	0.0815508	0.277816	2.13651	0.20754	2.53366	2.61123	0	-1.69929	-1.50645	0.569086	0.59817	1.40138	2.44819
YBL049W	YBL049W iESR cluster MOH1 biological process unknown molecular function unknown cellular component unknown | YBL050W	2.24802	2.06523	3.58413	1.94653	3.25245	3.18093	0	1.81852	2.27013	4.46824	1.67215	2.40438	1.30638	0	-1.98338	-0.523055	0.674881	1.69947	0.494485	-1.7284
YDR403W	YDR403W ... DIT1 spore wall assembly (sensu Fun catalytic activity cellular component unknown | YDR404C	1.12714	2.30063	1.33924	1.04693	2.51548	1.89697	0	2.60401	2.70623	3.58397	3.00472	4.23727	2.3482	0	-4.29271	-1.76503	1.53738	1.78693	3.07945	1.66392
YBR018C	YBR018C ... GAL7 galactose metabolism UTP-hexose-1-phosphate uridylyltrancytoplasm | YBR019C	0.875831	1.45325	1.01731	0.43222	2.98941	2.89697	0	0.403479	0.736246	2.08647	1.16699	2.92794	2.68924	0	-1.62975	-0.806848	0.537378	0.0950541	1.49448	1.81592
YDL210W	YDL210W ... UGA4 transport* putrescine transporter activity* vacuolar membrane (sensu Fungi) | YDL211C	-0.994534	0.281366	1.37988	0.124098	2.51548	3.60746	0	-0.292515	-0.415757	2.58397	1.39175	3.44877	3.4857	0	-1.62975	-2.16942	1.31499	0.610054	1.66441	1.66392
YNL194C	YNL194C iESR cluster YNL194C biological process unknown molecular function unknown cytoplasm* | YNL195C	1.24387	1.45559	2.01731	0.824537	3.86912	4.525	0	0.0409088	0.392623	2.80636	-0.258311	2.65231	2.3482	0	-2.79967	-3.74365	1.53738	0.661401	0.816413	1.66392
YOR032W-A	YOR032W-A ... YOR032W-A biological process unknown molecular function unknown cellular component unknown | YOR033C	0.397784	-0.0930299	2.9242	2.63189	2.73788	3.72294	0	0.349031	-0.622208	2.16893	2.17465	2.31127	1.02627	0	-1.62975	-1.73646	2.41185	3.48737	0.66441	1.66392
YJL116C	YJL116C ... NCA3 mitochondrion organization and molecular function unknown cellular component unknown | YJL117W	1.23372	1.57047	2.63692	1.86674	5.01798	8.42764	0	-0.425041	-0.294781	2.70099	0.134006	2.36785	4.41859	0	-0.338968	-0.495188	1.23782	1.1861	3.37223	5.28841
YHR007C-A	YHR007C-A ... YHR007C-A biological process unknown molecular function unknown cellular component unknown | YHR008C	-0.699078	1.21509	3.71775	0.114044	1.93052	3.0225	0	-0.181484	0.892365	4.39132	-1.58024	0.989343	1.61123	0	-1.91925	-1.79315	2.95242	0.864934	1.07945	2.66392
YNL120C	YNL120C PAC cluster | YNL121C	1.81925	2.46497	1.47674	2.82454	5.73788	4.02472	0	0.818516	0.584243	-0.000994	1.58969	4.89623	2.30765	0	-2.04478	-1.99949	-2.04758	2.37189	2.40138	0.412806
YDR034W-B	YDR034W-B ... YDR034W-B biological process unknown molecular function unknown cellular component unknown | YDR035W	0.255118	1.21509	3.40337	1.17817	4.13997	4.3079	0	0.00294099	0.513854	4.51112	0.922261	3.44877	2.4857	0	-1.91925	-2.22189	-0.337092	0.424362	1.07945	0.66392
YBR285W	YBR285W iESR cluster YBR285W biological process unknown molecular function unknown cellular component unknown | YBR286W	-0.059074	1.73705	1.57531	0.848384	3.57438	5.17225	0	0.769607	1.09239	2.64926	1.28766	3.92008	4.4857	0	0.748765	1.41554	2.06789	2.13743	2.07945	3.53839
YHR001W-A	YHR001W-A ... QCR10 aerobic respiration* ubiquinol-cytochrome-c reductase acmitochondrion* | YHR002W	1.60835	0.0875424	5.0834	1.67869	3.91567	2.8705	0	0.584051	0.631549	5.68551	1.21117	3.48145	1.02627	0	0.881215	0.0708964	3.85931	1.99338	2.62402	1.45747
YJL133C-A	YJL133C-A ... YJL133C-A biological process unknown molecular function unknown cellular component unknown | YJL133W	0.687422	0.112554	1.84435	0.288818	3.13279	2.24295	0	1.96339	1.96475	1.04003	0.469004	3.00763	1.9204	0	-1.15014	-0.508507	-0.94067	-0.880493	0.297628	-0.401035
YPL058C	YPL058C ... PDR12 transport* xenobiotic-transporting ATPase actiplasma membrane | YPL059W	0.598386	1.19617	1.35955	1.74347	4.49262	6.02618	0	0.265124	0.59425	1.27242	0.797362	0.257832	0.813277	0	-1.05761	-1.376	-0.129379	0.321081	0.111869	1.02124
YBR294W	YBR294W ... SUL1 sulfate transport sulfate transporter activity plasma membrane | YBR295W	-0.913418	-1.04723	1.16027	0.731428	3.13997	5.23195	0	-2.16011	-1.49548	0.771595	0.49015	3.4812	5.15555	0	-1.58731	-1.1988	-1.17312	-0.325543	-0.33559	1.66392
YOR134W	YOR134W ... BAG7 small GTPase mediated signal t signal transducer activity* intracellular | YOR135C	1.88964	2.73705	2.18724	0.924073	3.13997	3.56682	0	0.818516	1.50178	3.73597	-0.480704	2.5129	1.61123	0	-2.04478	0.58547	0.537378	0.979577	0.0794474	1.07896
YGL193C	YGL193C ... | YGL194C	0.497319	0.807434	2.33924	-0.497391	2.7885	4.81258	0	0.818516	0.484707	3.45844	0.49015	0.796698	2.02627	0	-1.62975	-0.736459	1.53738	0.0499662	-1.33559	-0.506005
YBL048W	YBL048W … RRT1 | Identified in a screen for mutants with increased levels of rDNA transcription; dubious open reading frame unlikely to encode a protein, based on experimental and comparative sequence dataYBL049W	1.88747	2.64394	3.35835	1.87516	3.35198	2.49198	0	1.57059	2.95864	3.91866	1.6568	2.60825	0.573758	0	-2.29271	-1.16942	-0.0475849	0.734464	0.0794474	-2.03652
YGR067C	YGR067C ... YGR067C biological process unknown molecular function unknown cellular component unknown | YGR068C	0.853463	0.556473	0.86531	-0.29094	1.93052	2.72294	0	0.769607	1.30414	2.99901	0.474209	2.44877	2.61123	0	-1.95168	-1.76503	1.33093	0.893847	1.40138	2.53839
YNR056C	YNR056C ... BIO5 biotin biosynthesis* permease activity plasma membrane | YNR057C	-0.953342	-1.06266	1.06462	-1.91243	3.046	4.16205	0	1.26832	0.532154	3.98086	-0.201728	3.82223	0.933161	0	-2.23241	-1.23215	-0.495044	-1.66053	-0.920553	-0.599114
YKL051W	YKL051W ... SFK1 actin cytoskeleton organizatio molecular function unknown plasma membrane | YKL052C	1.22573	1.87031	4.07621	1.23957	3.51548	5.06689	0	1.16644	1.9072	4.0434	-0.952208	2.7967	4.4857	0	-3.69686	-5.53865	1.45492	-0.865145	1.66441	2.88631
YGL184C	YGL184C ... STR3 methionine biosynthesis cystathionine beta-lyase activity peroxisome | YGL185C	-1.05157	-1.13547	3.87657	3.49994	4.02476	5.30116	0	0.724189	1.06818	4.07993	3.89763	4.40888	5.42482	0	-2.24004	-2.27513	1.54966	0.815129	1.07945	2.76927
YOR381W-A	YOR381W-A ... YOR381W-A biological process unknown molecular function unknown cellular component unknown | YOR382W	-0.239646	-0.348366	2.78969	1.75054	3.10045	2.43754	0	-0.181484	-1.00072	2.60146	0.49015	3.44877	1.24866	0	-0.0447845	-0.348366	1.13983	-1.535	0.0794474	1.30135
YOL131W	YOL131W ... YOL131W biological process unknown molecular function unknown cellular component unknown | YOL132W	0.856632	0.294507	4.0852	2.9971	4.57438	2.51297	0	-1.67017	-0.613183	4.36855	1.49921	3.15927	0.709391	0	-0.533469	1.70997	2.179	2.54445	2.07945	-0.822883
YML118W	YML118W ... NGL3 biological process unknown endonuclease activity cellular component unknown | YML119W	0.491865	0.807434	1.78285	1.26396	2.67775	3.97669	0	0.338523	0.557771	2.27911	0.993752	3.18199	3.1962	0	-0.60278	-0.0804129	0.8455	0.912463	1.79565	2.98585
YBR067C	YBR067C ... TIP1 cell wall organization and bio structural constituent of cell wallcell wall (sensu Fungi) | YBR068C	1.89965	2.11632	4.80499	3.39325	2.13896	3.54745	0	0.662217	1.02999	4.6071	2.15031	1.2576	1.9959	0	-2.73686	-3.71633	1.0428	0.236458	1.85326	2.66526
YJL160C	YJL160C ... YJL160C biological process unknown molecular function unknown cellular component unknown | YJL161W	1.49732	-0.107234	3.05294	1.63189	2.69606	5.10996	0	1.93399	0.570039	3.3495	0.507224	2.47477	4.2742	0	1.54018	0.986303	1.43784	1.20197	0.927444	3.24888
YHR180W	YHR180W | YHR180W-A	-0.074587	-0.463868	0.602276	-0.912428	3.10045	3.41482	0	0.70486	0.442887	-0.264029	0.682795	3.89623	3.02627	0	-2.50422	-1.83599	0.952415	0.465004	3.40138	3.40089
YNR058W	YNR058W ... BIO3 biotin biosynthesis adenosylmethionine-8-amino-7-oxononcytoplasm | YNR059W	0.760354	0.932061	2.42382	0.317577	3.49585	4.05677	0	2.64537	2.32121	4.40166	1.39958	3.53478	1.89569	0	-0.267177	0.178844	-0.60558	0.298831	0.117922	0.700446
YCR021C	YCR021C ... HSP30 response to stress molecular function unknown plasma membrane | YCR022C	2.01274	1.50643	4.23971	1.6427	4.51548	2.3079	0	0.538409	0.16434	5.05067	1.21623	4.1988	0.781158	0	-0.0447845	-0.65157	2.65285	1.62647	4.03364	1.20824
YBL071C-B	YBL071C-B ... YBL071C-B biological process unknown molecular function unknown cellular component unknown | YBL071W-A	0.982746	2.64394	3.01731	2.3481	4.43231	3.19242	0	-1.76645	-0.415757	2.80636	-0.410314	2.2895	1.3482	0	-0.629747	0.322435	2.27434	0.10886	2.3796	2.24888
YMR251W-A	YMR251W-A iESR cluster HOR7 response to stress molecular function unknown endoplasmic reticulum* | YMR252C	0.557861	1.12936	1.97292	-0.538033	3.25245	1.43754	0	-1.76645	-0.863216	3.364	-0.995277	3.10482	0.500201	0	-2.85214	-2.51407	1.15595	0.449897	2.30184	0.15696
YLR054C	YLR054C ... OSW2 spore wall assembly (sensu Fun molecular function unknown cytoplasm* | YLR055C	0.646697	2.15851	2.68028	1.61972	3.19356	3.27043	0	1.77412	2.75671	4.07511	2.91726	3.87687	3.79181	0	-0.767251	0.193152	1.33093	1.98487	-0.0725556	1.14935
YER081W	YER081W ... SER3 serine family amino acid biosy phosphoglycerate dehydrogenase acticytoplasm | YER082C	1.16773	1.41221	2.89077	2.75718	4.05768	3.50951	0	2.22435	1.58756	1.6608	2.74885	2.48135	2.48587	0	0.105995	0.109321	-0.124814	0.700039	-0.26174	-0.33671
YLR142W	YLR142W iESR cluster PUT1 glutamate biosynthesis* proline dehydrogenase activity mitochondrion | YLR143W	0.70377	1.37263	1.09532	2.19377	4.046	4.51435	0	0.147824	1.07457	1.63644	2.37396	3.18574	3.15555	0	-1.52283	-0.999493	0.952415	2.41142	-0.183587	2.32689
YDL169C	YDL169C ... UGX2 biological process unknown molecular function unknown cellular component unknown | YDL170W	0.982746	0.569935	0.875294	2.12571	5.10045	3.44876	0	0.87741	-0.415757	1.58397	2.15156	3.89623	3.45254	0	-0.822392	0.170432	0.859306	1.73446	2.77989	1.53839
YNL065W	YNL065W ... AQR1 drug transport* monocarboxylic acid transporter actplasma membrane | YNL066W	0.837758	1.3938	-0.0151082	-0.121015	4.0281	4.10397	0	1.08722	1.135	0.221398	0.348678	3.72435	4.27527	0	-1.33303	-1.13308	-0.0964945	-0.269652	0.350301	0.894995
YKL096W-A	YKL096W-A ... CWP2 cell wall organization and bio structural constituent of cell wallcell wall (sensu Fungi) | YKL097C	1.95913	3.26582	2.20174	1.07288	2.51548	4.34443	0	0.734124	1.05817	1.59486	-1.06886	1.19579	0.856345	0	0.922049	0.222899	0.591016	-0.150672	3.75405	3.58146
YDL049C	YDL049C ... KNH1 beta-1,6 glucan biosynthesis molecular function unknown cell wall (sensu Fungi)* | YDL050C	0.9923	2.26452	2.54569	2.14647	2.93052	3.05812	0	1.02161	1.85726	2.34296	2.37818	3.04824	2.65854	0	-1.22312	-0.41453	0.952415	0.536954	3.07945	2.84449
YOR306C	YOR306C ... MCH5 transport transporter activity* membrane | YOR307C	0.05135	0.678151	4.05684	2.13057	2.98167	3.151	0	0.221206	0.480579	4.87893	1.97477	2.57938	2.97078	0	-0.0891786	0.379019	1.73336	2.41249	1.42955	2.19339
YOL083W	YOL083W iESR cluster YOL083W biological process unknown molecular function unknown cellular component unknown | YOL084W	0.880983	0.987589	1.13705	0.415425	3.53933	2.23195	0	1.39225	1.30453	1.85315	0.559691	3.81716	1.61123	0	-0.77061	-0.48824	0.866685	1.31745	2.40138	1.16642
YMR175W	YMR175W ... SIP18 response to osmotic stress* phospholipid binding soluble fraction | YMR175W-A	1.81925	2.15851	2.97509	1.09463	5.0598	2.82985	0	1.75712	1.51385	3.10592	1.12671	4.84732	2.52877	0	0.955216	0.51508	1.29637	1.39991	0.0794474	-1.506
YGL230C	YGL230C ... YGL230C biological process unknown molecular function unknown cellular component unknown | YGL231C	0.792775	1.93672	1.95591	2.52498	3.93052	4.38005	0	1.05952	1.64314	1.58397	1.81208	2.7967	3.61123	0	-1.50422	-0.999493	1.36745	1.59429	2.40138	2.53839
YMR095C	YMR095C ... SNO1 pyridoxine metabolism* molecular function unknown cytoplasm | YMR096W	1.84782	0.514653	3.26524	2.14647	1.93052	2.0225	0	0.625871	0.361851	4.45844	1.70516	1.98934	0.0262703	0	-2.04478	-1.80685	1.53738	1.37189	0.0794474	0.078958
YLL046C	YLL046C ... RNP1 ribosome biogenesis and assemb RNA binding cytoplasm | YLL047W	-0.604003	-0.903093	3.82467	2.99446	4.25245	4.48193	0	-0.282806	-1.81078	3.58397	2.32665	2.98934	2.61123	0	-1.73107	0	0.952415	1.95686	1.07945	2.07896
YGR043C	YGR043C … iESR cluster NQM1 biological process unknown transaldolase activity | Transaldolase of unknown function; transcription is repressed by Mot1p and induced by alpha-factor and during diauxic shiftYGR044C	1.7842	2.83391	2.52633	0.925466	2.38995	4.16546	0	1.46621	1.5298	3.04452	0.850395	3.4812	3.3955	0	-2.62975	-1.05394	0.952415	1.33662	0.886802	2.07896
Cluster_7	#N/A	0	0	0	0	0	0	0	0	0	0	0	0	0	0	0	0	0	0	0	0
YCR083W	YCR083W ... TRX3 response to oxidative stress thiol-disulfide exchange intermediamitochondrion | YCR084C	0.345316	0.617464	1.71987	1.23732	1.70648	1.26981	0	-0.121363	0.6188	2.02406	1.07511	0.464854	0.878172	0	0.0588382	0.113965	0.204689	0.436547	-0.00185265	0.0553067
YMR104C	YMR104C ... YPK2 protein amino acid phosphoryla protein kinase activity cytoplasm* | YMR105C	1.04439	1.15797	2.89595	1.46344	1.86275	2.07658	0	1.48148	1.40756	2.80449	0.678495	1.0606	1.37991	0	0.85854	1.18978	0.945842	1.08391	0.00448539	0.636953
YHR138C	YHR138C iESR cluster YHR138C vacuole fusion, non-autophagic endopeptidase inhibitor activity cellular component unknown | YHR139C	0.72525	0.570921	1.41046	0.670992	1.62094	1.40101	0	0.783413	0.721179	2.11982	0.679323	0.546042	0.824855	0	0.208972	0.640611	0.116534	0.491634	-0.273342	-0.117439
YJL166W	YJL166W ... QCR8 aerobic respiration* ubiquinol-cytochrome-c reductase acrespiratory chain complex III (sens | YJL167W	1.57394	1.53882	3.17509	1.63189	3.27037	2.63988	0	1.47456	1.49027	3.42843	0.905188	2.31127	1.84296	0	1.61126	1.64903	1.77139	1.21394	1.16691	0.941454
YDR018C	YDR018C ... YDR018C phospholipid biosynthesis acyltransferase activity cellular component unknown | YDR019C	1.20396	1.40293	2.01731	1.86407	2.6224	2.92939	0	1.15194	1.05373	2.22551	1.65923	2.45883	2.10156	0	1.78709	2.18271	1.53738	2.1716	1.02286	1.2716
YGR183C	YGR183C ... QCR9 aerobic respiration* ubiquinol-cytochrome-c reductase acrespiratory chain complex III (sens | YGR184C	1.42662	1.12936	2.36214	1.7839	2.64101	2.63849	0	1.72122	0.982792	2.74747	1.41976	2.21641	1.97844	0	0.717056	0.241515	1.64841	2.02073	0.941944	1.19925
YGL010W	YGL010W iESR cluster YGL010W biological process unknown molecular function unknown endoplasmic reticulum | YGL011C	-0.230308	0.711954	1.18101	0.992482	0.930521	0.958933	0	-0.425902	0.342933	1.29156	0.522854	0.389583	1.00118	0	-0.17202	0.229989	0.722548	0.254437	0.418934	0.783219
YJR096W	YJR096W iESR cluster YJR096W arabinose catabolism* aldo-keto reductase activity* cytoplasm* | YJR097W	0.504893	1.38206	1.26375	1.16641	1.48323	1.64761	0	-0.259486	0.394343	1.06805	0.695296	0.723361	0.999303	0	0.336645	1.07433	0.672307	0.966967	0.541553	1.05199
YDR272W	YDR272W iESR cluster GLO2 carbohydrate metabolism hydroxyacylglutathione hydrolase accytoplasm | YDR273W	-0.0406129	0.852522	1.08069	0.849199	1.17314	1.12998	0	0.0323468	0.576589	1.18895	0.731705	0.481941	0.834763	0	-0.00272042	1.26163	0.426692	0.689763	0.0878109	0.497975
YJL102W	YJL102W ... MEF2 translational elongation translation elongation factor activmitochondrion | YJL103C	0.0911782	0.808747	0.88521	0.706117	0.133014	0.979854	0	-0.477616	0.105539	1.0579	0.469846	-0.0971938	0.774398	0	-0.105539	0.519668	-0.000279	0.217566	-0.642772	0.767497
YOR226C	YOR226C ... ISU2 iron ion homeostasis* molecular function unknown mitochondrial matrix | YOR227W	1.04986	1.25489	1.18624	1.2791	1.96517	1.84873	0	0.876127	1.28708	1.06041	0.680288	1.24148	1.6044	0	0.971157	0.750529	0.129293	0.135332	1.01281	0.956215
YJL089W	YJL089W ... SIP4 regulation of transcription fr specific RNA polymerase II transcrinucleus | YJL090C	1.05125	2.27806	2.20996	2.36886	3.00377	3.707	0	0.393211	1.87899	3.14585	2.40465	2.6332	2.66186	0	-0.47009	0.263541	0.952415	2.10886	0.194925	0.972043
YOR289W	YOR289W iESR cluster YOR289W biological process unknown molecular function unknown cytoplasm* | YOR290C	1.03637	1.19792	1.11011	0.989475	2.1171	1.37231	0	0.681882	0.776888	1.32697	1.07895	1.28081	0.82859	0	0.413066	0.787333	0.560728	1.06704	0.353208	0.393831
YKL182W	YKL182W ... FAS1 fatty acid biosynthesis [acyl-carrier protein] S-malonyltramitochondrion* | YKL183C-A	0.0448112	0.65086	0.782493	0.424431	0.218441	1.59104	0	0.0708905	0.013903	1.15712	0.57257	0.189176	0.873782	0	-0.0277799	0.0467094	0.357766	0.676505	-0.249041	0.798266
YDR479C	YDR479C ... PEX29 peroxisome organization and bi molecular function unknown peroxisomal membrane | YDR480W	0.117716	0.57639	0.910891	0.793731	0.950061	0.909157	0	-0.105535	0.17566	0.885664	0.646139	0.739365	0.804946	0	0.0458859	0.507946	0.381808	0.703274	-0.0508606	0.2986
YBR145W	YBR145W ... ADH5 alcohol metabolism alcohol dehydrogenase activity cytoplasm* | YBR146W	0.409942	1.14904	2.41324	3.31427	1.91762	1.10173	0	0.498297	1.51559	1.7567	3.46615	2.15267	1.75927	0	0.194118	0.807862	0.689381	1.21745	0.145124	-0.528281
YHR124W	YHR124W ... NDT80 meiosis* transcription factor activity nuclear chromosome | YHR125W	1.87583	1.43748	4.01731	0.824537	0.930521	1.19242	0	0.555482	1.22167	5.12829	1.6568	1.57431	0.933161	0	-1.62975	-0.262527	0.952415	0.301505	0.953917	0.400886
YLR260W	YLR260W ... LCB5 response to heat* D-erythro-sphingosine kinase activimembrane fraction* | YLR261C	0.628742	0.766108	0.93694	0.564954	0.644563	1.80319	0	0.327946	0.291834	1.40781	0.359111	0.692514	1.40857	0	-0.156843	-0.121977	-0.173762	0.0685634	-0.405979	0.75934
YML110C	YML110C iESR cluster COQ5 aerobic respiration* "2-hexaprenyl-6-methoxy-1,4-benzoqui"mitochondrion | YML111W	-0.0064824	0.666946	1.11465	1.06436	1.59057	0.961008	0	-0.312615	0.540284	0.779071	0.834965	0.890525	0.871959	0	0.3908	1.01551	0.723352	0.528162	0.545718	0.366009
YGL141W	YGL141W ... HUL5 protein monoubiquitination* ubiquitin-protein ligase activity cytoplasm* | YGL142C	0.558434	1.09395	1.24761	0.938858	1.04489	1.34197	0	0.42489	0.476072	1.35385	0.63408	0.729174	0.993674	0	0.319899	0.436115	0.29637	0.43399	0.0357702	0.341992
YDR377W	YDR377W ... ATP17 ATP synthesis coupled proton t hydrogen-transporting ATP synthase proton-transporting ATP synthase co | YDR378C	0.136999	0.479222	0.813152	0.907421	1.25619	1.31023	0	0.316016	0.274915	0.663742	0.513788	0.834561	1.16849	0	0.630253	0.524069	0.428934	0.309257	0.735493	0.739869
YIL097W	YIL097W iESR cluster FYV10 negative regulation of glucone molecular function unknown cytoplasm* | YIL098C	1.1365	1.01672	1.06716	0.800747	1.18187	1.68723	0	0.907784	0.559239	1.30279	0.520644	0.862966	0.980827	0	0.540178	0.657982	0.247036	0.576846	-0.314034	0.527162
YFL033C	YFL033C ... RIM15 protein amino acid phosphoryla protein kinase activity cytoplasm* | YFL034C-A	1.58589	1.96193	1.47312	1.07915	1.28523	2.21407	0	1.09448	1.02738	1.55536	0.793093	1.25128	1.72589	0	0.479149	0.493088	0.42461	0.816042	-0.0929416	0.727897
YOR188W	YOR188W PAC cluster MSB1 establishment of cell polarity molecular function unknown mitochondrion* | YOR189W	0.707797	0.912895	0.623586	0.808489	0.586868	1.83129	0	0.232954	-0.286838	0.18883	0.392372	0.221781	1.19058	0	-0.196521	0.0207203	-0.383265	0.108009	-0.727581	0.655489
YMR173W-A	YMR173W-A iESR cluster | YMR174C	3.46079	1.67564	3.66117	2.59007	2.44509	3.16	0	2.81852	0.916818	3.52257	1.85272	1.82584	1.02627	0	3.20314	0.918045	2.27434	3.07971	0.731524	1.45747
YML131W	YML131W iESR cluster YML131W biological process unknown molecular function unknown cytoplasm | YML132W	0.741738	1.25031	2.93909	2.46925	3.78668	2.77176	0	1.05668	1.29829	2.09961	0.625135	1.25384	0.378198	0	0.814472	1.30307	1.09477	1.83719	0.846017	0.377114
YIR043C	YIR043C	0.059914	0.26954	1.22013	1.1803	1.36348	1.1131	0	0.391095	0.258015	1.59301	0.90344	0.574305	0.943808	0	0.477168	0.322435	0.414319	0.937712	-0.00544145	0.799804
YBR012C	YBR012C ... | YBR013C	1.02829	1.24672	1.40963	0.929507	3.71188	2.88875	0	1.38372	1.24592	1.53039	1.03169	3.5129	2.74509	0	1.54018	1.66476	0.475977	0.833798	2.56057	1.76078
YGR239C	YGR239C ... PEX21 protein-peroxisome targeting protein binding* cytosol* | YGR240C	0.608351	1.1845	2.16027	0.654612	1.39447	1.1568	0	0.95602	0.914888	2.32093	1.47865	1.76072	1.35522	0	-0.951675	-1.45892	0.689381	0.389596	0.221466	-0.149311
YFR015C	YFR015C ... GSY1 glycogen metabolism glycogen (starch) synthase activitycytoplasm* | YFR016C	0.118654	1.00365	1.96673	0.979448	4.59845	3.23243	0	-0.361033	0.733386	1.29533	1.14184	3.78932	2.32085	0	2.8047	3.68733	1.78441	1.81113	2.9648	1.91546
YBR176W	YBR176W ... ECM31 pantothenate biosynthesis 3-methyl-2-oxobutanoate hydroxymethmitochondrion | YBR177C	0.495212	0.924248	0.778126	1.33326	1.43231	1.42249	0	0.461951	0.794166	0.958364	1.44474	1.04581	1.43756	0	0.0666368	0.332827	0.445455	0.306799	0.47925	0.754783
YJR103W	YJR103W ... URA8 phospholipid biosynthesis* CTP synthase activity cytosol | YJR104C	0.748281	0.959438	1.32711	0.997643	1.63558	1.66791	0	0.741349	0.97835	1.69996	1.05634	1.70664	1.70251	0	0.540178	0.751652	0.630487	0.774939	0.634036	0.785384
YIL136W	YIL136W iESR cluster OM45 biological process unknown molecular function unknown mitochondrial outer membrane | YIL137C	0.193313	0.290299	1.06854	0.704697	0.812465	1.28929	0	0.329478	-0.0648499	1.2893	0.253751	0.489417	0.968785	0	0.564025	0.90321	0.332263	0.492189	-1.04984	0.145047
YPR075C	YPR075C ... OPY2 cell cycle arrest in response molecular function unknown cytoplasm* | YPR076W	0.246474	0.56603	0.962319	0.909877	0.884817	1.31565	0	0.0178252	0.190835	1.06696	0.364034	0.288127	0.570486	0	0.472215	0.674214	0.00812453	0.307354	-0.204211	0.345033
YFL052W	YFL052W ... YFL052W biological process unknown DNA binding cellular component unknown | YFL053W	2.29641	2.15112	2.37487	1.81758	3.66435	3.5213	0	2.38967	2.59444	1.72693	2.21717	3.34842	3.2509	0	2.6963	2.65537	1.78531	2.32967	2.25633	2.19925
YER162C	YER162C ... RAD4 nucleotide-excision repair, DN damaged DNA binding repairosome* | YER163C	0.37569	0.290981	0.941762	0.680147	0.583963	1.33616	0	0.706871	-0.23338	0.938885	0.531269	0.274745	0.665172	0	-0.0447845	0.937771	0.604492	0.829243	-0.418052	0.235077
YAL054C	YAL054C ... ACS1 acetyl-CoA biosynthesis* acetate-CoA ligase activity mitochondrion* | YAL055W	0.777129	1.31267	2.2807	1.28638	1.88072	2.57158	0	0.600336	1.3634	3.22049	1.16379	1.49306	1.52788	0	-0.354113	0.175594	0.156614	0.804526	-0.216946	0.40392
YER163C	YER163C ... YER163C biological process unknown molecular function unknown cytoplasm* | YER164W	-0.284835	0.375119	0.83742	1.17496	1.0241	0.704583	0	-0.194251	0.373161	1.08215	0.846658	0.411798	0.577349	0	-0.00714682	0.663472	0.0772666	0.620163	0.234422	0.249329
YMR184W	YMR184W … ADD37 biological process unknown molecular function unknown | Protein of unknown function involved in ER-associated protein degradation; green fluorescent protein (GFP)-fusion protein localizes to the cytoplasm and is induced in response to the DNA-damaging agent MMS; YMR184W is not an essential geneYMR185W	0.184312	0.646699	0.423738	0.930238	0.71585	1.0468	0	0.0565564	0.154276	0.272814	0.582459	0.244157	0.703193	0	0.33542	0.391727	-0.511795	-0.383379	0.135716	0.656756
YKL066W	YKL066W ... | YKL067W	-0.10925	0.5444	1.00503	0.71381	1.41801	0.915988	0	-0.636049	-0.0808899	1.09822	0.339536	0.22813	0.320556	0	-0.269345	0.250485	-0.280612	-0.197922	-0.628949	-0.670346
YDR475C	YDR475C ... JIP4 biological process unknown molecular function unknown cellular component unknown | YDR476C	0.665327	0.572704	0.786226	0.62065	0.798365	1.56226	0	0.43943	0.209587	0.675023	0.563316	0.918762	1.27986	0	0.545914	0.763562	0.370188	0.511166	-0.152544	0.658777
YGR250C	YGR250C iESR cluster YGR250C biological process unknown RNA binding cytoplasm | YGR251W	1.92736	1.74191	2.04748	1.56852	1.84806	2.81589	0	2.22203	1.23277	2.42291	1.29583	1.26473	1.61123	0	0.68165	0.559238	1.13358	1.59261	0.0329049	1.29671
YAL034C	YAL034C ... FUN19 biological process unknown molecular function unknown cellular component unknown | YAL034W-A	0.503478	0.810586	1.64404	0.580771	1.64422	1.8411	0	0.00633158	0.456033	1.83529	0.341927	0.851015	0.955387	0	0.136242	0.424716	-0.0475849	0.258436	-0.114376	0.356739
YGR111W	YGR111W ... YGR111W biological process unknown molecular function unknown cytoplasm* | YGR112W	0.176597	0.84489	1.12032	0.995552	1.62941	1.86675	0	0.291482	0.397291	0.885504	0.633716	1.24677	1.14806	0	0.400099	0.974228	0.632266	0.886467	0.475913	0.950025
YER182W	YER182W ... FMP10 biological process unknown molecular function unknown mitochondrion | YER183C	0.0939636	0.497094	0.729068	1.20758	1.09123	0.848469	0	0.055911	0.384934	0.905139	0.756796	0.601613	0.611233	0	0.251106	0.58547	0.276613	0.548988	-0.320356	-0.251191
YER168C	YER168C ... CCA1 tRNA modification tRNA adenylyltransferase activity cytoplasm* | YER169W	0.0550197	0.608889	0.727418	0.767497	0.452569	1.0337	0	0.147534	0.231941	0.524393	0.462494	0.252823	0.819325	0	0.0842955	0.134728	-0.0440875	0.0281155	0.038729	0.71547
YKL062W	YKL062W ... MSN4 response to stress* DNA binding* cytoplasm* | YKL063C	0.639387	1.13552	1.88195	1.03044	2.61388	3.49076	0	0.799047	0.856367	2.20083	0.685414	2.07634	2.3087	0	1.91502	2.23702	1.06247	1.19228	0.823491	1.84306
YML016C	YML016C ... PPZ1 sodium ion homeostasis protein serine/threonine phosphatascytoplasm* | YML017W	0.525648	0.606951	1.18263	0.637151	1.08181	1.77667	0	0.6542	0.573463	1.07423	0.287509	0.708475	1.32493	0	0.121048	0.216236	0.132766	0.123967	-0.231886	0.557498
YEL058W	YEL058W ... PCM1 N-acetylglucosamine biosynthes phosphoacetylglucosamine mutase actcytoplasm* | YEL059C-A	0.422622	0.737045	0.969146	0.67834	1.19012	0.948498	0	0.419929	0.770749	0.82935	0.408958	0.659684	0.94578	0	0.122196	0.342511	-0.0504588	0.156466	0.0942211	0.117579
YOL016C	YOL016C ... CMK2 protein amino acid phosphoryla calcium- and calmodulin-dependent pcytoplasm | YOL017W	0.814602	1.4274	1.21693	0.702718	1.43753	1.67535	0	0.53812	0.792245	1.66784	1.0018	1.43168	1.43706	0	0.160947	0.810896	0.112306	0.47156	-0.247282	0.273723
YNL208W	YNL208W iESR cluster YNL208W biological process unknown molecular function unknown mitochondrion | YNL209W	0.642845	0.388702	1.30677	0.503391	1.7824	1.30908	0	0.507766	0.148976	1.22919	-0.0349355	0.866682	0.582385	0	1.63569	1.23026	0.000904	0.46383	-0.217445	-0.207398
YPL186C	YPL186C iESR cluster UIP4 biological process unknown molecular function unknown endoplasmic reticulum* | YPL187W	1.13887	0.737045	2.82467	2.059	1.60037	2.75946	0	1.88891	1.22167	2.87347	1.72462	1.38789	2.72671	0	1.63329	2.00051	1.65285	2.29938	0.867943	2.01756
YBR047W	YBR047W ... FMP23 biological process unknown molecular function unknown mitochondrion | YBR048W	3.03337	1.78144	2.68028	2.31392	3.41165	2.90514	0	2.98844	1.52284	2.50151	1.73055	3.1323	3.11373	0	1.82968	0.907398	1.36745	0.671455	1.30184	0.66392
YDR336W	YDR336W ... YDR336W biological process unknown molecular function unknown cellular component unknown | YDR337W	0.241694	1.32201	1.63657	1.61736	1.53574	2.28337	0	0.320176	0.627312	1.29391	1.13762	0.364488	1.41176	0	0.352286	1.16313	0.820108	1.24406	0.298088	1.15491
YOL009C	YOL009C ... MDM12 mitochondrion organization and molecular function unknown mitochondrial outer membrane | YOL010W	0.649795	0.768409	0.7306	1.27845	0.975845	1.25412	0	0.545991	0.349467	0.691682	1.00472	0.553695	1.02627	0	1.02448	0.768837	0.50343	0.680017	0.0484206	0.614452
YOR173W	YOR173W iESR cluster DCS2 biological process unknown molecular function unknown cytoplasm | YOR174W	1.48164	2.80005	3.18724	1.28605	3.66749	3.23495	0	0.798888	2.0827	3.36306	0.72093	2.40438	1.39192	0	1.34567	2.95692	1.43911	1.66763	1.07945	0.804783
YHL048W	YHL048W ... COS8 response to unfolded protein molecular function unknown nuclear membrane | YHL049C	0.0847045	0.989932	1.15359	0.593105	1.11169	1.01512	0	0.113523	0.765608	1.15956	0.564063	0.912845	0.81244	0	0.808591	1.00723	0.114472	0.231767	0.0312384	0.0567052
YMR110C	YMR110C … iESR cluster HFD1 biological process unknown molecular function unknown | Putative fatty aldehyde dehydrogenase, located in the mitochondrial outer membrane and also in lipid particles; has similarity to human fatty aldehyde dehydrogenase (FALDH) which is implicated in Sjogren-Larsson syndromeYMR111C	0.0391868	0.337647	1.02347	0.518434	1.26236	1.33848	0	0.00899366	0.267547	1.08284	0.600957	0.531293	0.712483	0	-0.331406	-0.0393489	0.504115	0.724055	0.00573776	0.453353
YKL218C	YKL218C ... SRY1 amino acid derivative cataboli threo-3-hydroxyaspartate ammonia-lycellular component unknown | YKL219W	-0.339182	0.693976	0.869756	1.28022	1.24311	1.28214	0	0.197028	1.66671	1.8625	1.77026	1.64986	1.75304	0	-0.0936941	1.33931	0.736686	1.465	0.212714	0.177138
YBL045C	YBL045C ... COR1 aerobic respiration ubiquinol-cytochrome-c reductase acrespiratory chain complex III (sens | YBL046W	0.742206	1.1377	1.368	0.46706	1.60646	1.71931	0	0.868728	0.753182	1.11969	0.0834774	1.31978	1.33494	0	0.374754	0.327749	1.12556	0.940363	0.585459	1.04074
YBR039W	YBR039W ... ATP3 ATP synthesis coupled proton t hydrogen-transporting ATP synthase "proton-transporting ATP synthase, c" | YBR040W	0.696564	0.794427	1.07956	0.833426	1.05971	1.25306	0	0.532334	0.49063	1.08732	0.446703	0.620245	1.11951	0	0.894032	0.996725	0.424147	0.327835	0.155563	0.826541
YLR345W	YLR345W iESR cluster YLR345W biological process unknown molecular function unknown cytoplasm | YLR346C	0.663057	0.752642	0.940692	0.807435	1.21325	1.36772	0	0.472872	0.313662	1.08521	0.694286	0.584187	0.660701	0	0.601579	1.26876	0.457004	0.846408	0.0264291	0.491897
YOR065W	YOR065W ... CYT1 mitochondrial electron transpo "electron transporter, transferring"mitochondrial inner membrane* | YOR066W	0.961988	1.76258	3.56575	1.4095	2.62084	2.78331	0	1.66651	1.89237	3.53506	0.589686	1.95618	1.61123	0	1.72075	2.40261	2.85931	2.8432	-0.379984	1.07896
YGL259W	YGL259W ... YPS5 biological process unknown aspartic-type endopeptidase activitcellular component unknown | YGL260W	0.930279	1.52364	2.94015	0.778734	2.36591	3.0388	0	2.5734	2.63155	2.64286	1.09219	2.59061	2.34163	0	2.24062	2.37902	0.891015	0.514852	0.477997	0.204489
YKR053C	YKR053C ... YSR3 sphingolipid biosynthesis sphingosine-1-phosphate phosphataseendoplasmic reticulum | YKR054C	0.274927	0.528584	1.05979	0.555101	1.39882	0.779863	0	0.567394	1.18242	1.35422	0.872994	0.656643	0.721552	0	0.615466	1.16488	-0.0667724	0.254127	-0.813363	-0.853201
YKL065C	YKL065C iESR cluster YET1 biological process unknown molecular function unknown endoplasmic reticulum | YKL066W	0.189266	0.504142	1.35023	1.00993	1.37862	1.18689	0	0.156359	0.404579	1.35504	0.632838	0.594859	0.713506	0	0.122174	0.394964	0.241598	0.452451	-0.0322528	0.181231
YMR250W	YMR250W iESR cluster GAD1 response to oxidative stress* glutamate decarboxylase activity cytoplasm | YMR251W	1.76866	2.12043	3.05929	1.82223	4.15065	3.51435	0	0.376242	0.728557	2.411	0.479145	2.69302	1.84503	0	0.470265	1.13539	1.39973	1.60041	1.20463	0.69911
YML057W	YML057W ... CMP2 cell ion homeostasis* calcium-dependent protein serine/thcytoplasm* | YML058W	0.452925	0.899955	1.04065	0.347547	1.13667	1.032	0	-0.158354	0.356174	0.797372	-0.168113	0.178162	0.263117	0	-0.268149	-0.063896	0.0198144	0.166094	-1.02841	-0.562715
YOR019W	YOR019W ... YOR019W biological process unknown molecular function unknown cellular component unknown | YOR020C	0.977165	0.990802	1.1829	0.824537	1.6117	2.69806	0	0.696526	0.596521	1.91884	0.442129	0.760719	1.72671	0	0.389618	0.415545	-0.0871133	0.371894	-0.023646	1.03832
YGL121C	YGL121C iESR cluster GPG1 signal transduction signal transducer activity cellular component unknown | YGL122C	1.87041	2.00427	3.77301	2.64028	4.79276	4.19909	0	2.05342	2.18773	3.9525	0.854899	2.8316	1.79886	0	0.455645	1.3816	1.04757	1.87497	-0.191855	-0.258077
YPL164C	YPL164C ... MLH3 meiotic recombination* molecular function unknown nucleus | YPL165C	0.293228	0.713695	0.555733	0.542255	0.525789	1.41296	0	0.000893	0.173611	0.999006	0.829356	0.527	1.2034	0	0.0917886	0.666951	0.0731673	0.692663	-0.00850025	0.949878
YMR053C	YMR053C iESR cluster STB2 histone deacetylation transcriptional repressor activity nucleus* | YMR054W	0.55831	1.01974	1.25592	0.629521	1.45718	1.22895	0	0.289822	0.548619	1.19295	0.654537	1.07932	0.755818	0	0.0503728	1.13481	0.164391	0.736306	-0.369311	-0.176697
YCR102C	YCR102C ... YCR102C biological process unknown molecular function unknown cellular component unknown | YCR102W-A	0.328126	0.661214	0.828652	-0.230287	0.46536	-0.392539	0	0.997365	1.28245	2.09357	0.558375	0.667415	-0.432555	0	0.552332	0.65153	1.1275	0.87238	-0.148822	-1.09623
YJR008W	YJR008W iESR cluster YJR008W biological process unknown molecular function unknown cytoplasm* | YJR009C	1.18449	1.74777	3.06346	2.21456	2.85987	3.08732	0	0.50342	0.966614	2.98996	1.3693	1.25061	1.21493	0	-0.0447845	0.978812	0.800412	1.23759	-0.20066	-0.00850488
YOR221C	YOR221C ... MCT1 aerobic respiration* [acyl-carrier protein] S-malonyltramitochondrion | YOR222W	0.451026	0.550277	0.292548	0.533346	1.14048	1.3079	0	0.440954	0.420744	1.0924	0.523533	1.12516	1.62866	0	0.199141	0.0511331	0.365153	0.262801	0.0481513	0.607738
YKR076W	YKR076W iESR cluster ECM4 cell wall organization and bio molecular function unknown cytoplasm | YKR077W	0.90763	1.07557	1.12675	0.746535	2.04779	1.43437	0	1.34851	1.51921	1.50335	0.833611	1.03515	0.597102	0	-0.201289	0.158459	0.108333	0.745205	-1.11986	-0.963855
YKL142W	YKL142W iESR cluster MRP8 protein biosynthesis structural constituent of ribosome mitochondrial ribosome | YKL143W	0.523593	0.937504	0.867808	0.78668	1.0244	1.22627	0	0.123185	0.602133	1.013	0.454118	0.388123	0.684456	0	0.0348589	0.692017	-0.0252604	0.249944	-0.680746	0.0262027
YGL204C	YGL204C ... | YGL205W	0.484719	1.49193	1.14284	1.2508	2.15291	2.21514	0	1.61688	1.80664	2.34693	2.29013	2.86381	2.3482	0	1.67958	1.92334	1.01655	1.37189	2.53888	1.91546
YPL088W	YPL088W ... YPL088W aldehyde metabolism aryl-alcohol dehydrogenase activitycellular component unknown | YPL089C	0.0917333	0.724426	1.37531	0.752159	0.987602	1.00553	0	1.09559	1.29134	2.08453	-0.0498494	0.406401	0.681265	0	-0.295678	0.311753	-0.408851	0.464598	-0.237637	-0.00709982
YAL008W	YAL008W ... FUN14 biological process unknown molecular function unknown mitochondrion | YAL009W	1.00362	1.09875	1.36412	1.21644	2.08397	2.0697	0	1.00147	0.852439	1.22587	0.847854	1.50648	1.41947	0	0.675896	0.617853	0.282682	0.663784	0.445575	0.374643
YPL087W	YPL087W iESR cluster YDC1 response to heat* ceramidase activity endoplasmic reticulum | YPL088W	1.13406	1.20632	1.47873	1.12652	2.15856	1.77778	0	0.645577	1.31923	1.29887	0.618114	1.26035	1.11561	0	0.404563	0.547084	0.613971	0.841858	0.270528	0.168296
YNR007C	YNR007C ... ATG3 protein-vacuolar targeting* molecular function unknown cytoplasm | YNR008W	0.808717	1.19648	0.650256	1.29124	1.51548	1.62495	0	0.336365	0.629331	0.475444	1.09219	0.680239	0.599456	0	-0.0447845	0.983229	-0.201913	0.571203	-0.657518	-0.191131
YNR001C	YNR001C iESR cluster CIT1 tricarboxylic acid cycle* citrate (Si)-synthase activity mitochondrion* | YNR001W-A	0.345316	0.843245	1.30804	0.656081	1.4887	1.6504	0	0.333334	0.872292	1.26309	0.757685	1.21543	1.30688	0	0.694624	1.06196	0.727628	0.926009	0.354043	0.63578
YPL119C-A	YPL119C-A ... YPL119C-A biological process unknown molecular function unknown cellular component unknown | YPL120W	0.618335	3.17999	1.2874	1.47661	2.47801	2.91866	0	0.518956	2.52284	1.5554	1.55492	1.71517	2.02627	0	-0.585353	0.807862	0.0348773	1.02397	0.838439	1.86323
YPL203W	YPL203W iESR cluster TPK2 protein amino acid phosphoryla protein serine/threonine kinase actcytoplasm* | YPL204W	0.57922	1.03719	0.759777	0.470279	1.46822	1.46705	0	0.151191	0.576338	0.678368	0.345891	0.777122	1.0765	0	0.303861	0.611143	0.363142	0.631061	0.0794474	0.707435
YLR414C	YLR414C ... YLR414C biological process unknown molecular function unknown cytoplasm* | YLR415C	0.996057	1.27011	2.14493	1.12248	2.13122	2.31234	0	0.272933	0.779435	2.69578	0.473059	0.958878	1.06056	0	-0.0558397	0.168732	-0.106919	0.321022	0.0880349	0.433241
YMR182C	YMR182C ... RGM1 negative regulation of transcr RNA polymerase II transcription facnucleus | YMR182W-A	1.84127	1.36383	1.89178	1.82454	1.54523	1.48193	0	1.95097	1.95621	0.999006	2.22712	2.09787	1.75419	0	-0.221662	-0.627524	2.36745	1.78693	0.327375	1.07896
YBR108W	YBR108W … AIM3 biological process unknown molecular function unknown | Protein interacting with Rvs167p; null mutant is viable and displays elevated frequency of mitochondrial genome lossYBR109C	0.667607	0.375054	1.20174	0.948481	0.120293	1.24394	0	-0.017013	-0.59381	1.31906	0.780744	0.0855583	0.582132	0	0.41712	0.643715	-0.17482	0.100461	-1.2793	-0.316271
YPR094W	YPR094W ... RDS3 nuclear mRNA splicing, via spl transcription factor activity spliceosome complex | YPR095C	-0.0356324	0.643936	1.14891	1.18564	0.923948	1.28273	0	0.129446	0.572747	0.836155	0.744334	0.263266	1.05122	0	-0.441675	-0.162992	-0.0475849	-0.0623893	-0.162753	0.252606
YBL091C-A	YBL091C-A ... SCS22 biological process unknown* molecular function unknown cellular component unknown | YBL092W	0.221488	0.84557	0.930726	1.1673	1.69964	1.21403	0	-0.0732307	0.43224	0.747133	1.23459	1.09698	1.00835	0	0.288342	0.667264	0.741648	0.747039	0.559057	0.533524
YGL227W	YGL227W ... VID30 vacuolar protein catabolism* molecular function unknown cytoplasm* | YGL228W	0.616372	1.0079	0.816563	0.628064	0.638512	1.44325	0	0.570912	0.425253	1.04426	0.522456	0.595707	0.925507	0	0.507051	1.11502	0.103357	0.686179	-0.788941	0.241229
YDL072C	YDL072C ... YET3 biological process unknown molecular function unknown endoplasmic reticulum | YDL073W	0.275117	0.452932	1.29705	0.6334	1.47364	0.99483	0	-0.0768814	0.213863	0.980731	0.0322945	0.511445	0.350936	0	-0.0716797	-0.053544	0.110043	-0.0311415	0.209689	0.0251124
YNL293W	YNL293W ... MSB3 actin filament organization* Rab GTPase activator activity bud tip* | YNL294C	0.384596	0.563016	1.25881	1.32563	1.09668	1.20114	0	0.506889	0.539849	1.25131	0.625019	0.373574	0.913796	0	-0.295011	0.473389	0.0986358	0.890436	-0.578447	0.155579
YJR039W	YJR039W ... YJR039W biological process unknown molecular function unknown mitochondrion | YJR040W	0.458144	0.590395	1.3235	1.11017	1.44076	1.38105	0	0.275298	0.423673	1.37285	1.11029	0.967539	1.07332	0	0.909497	1.32992	0.162307	0.736839	-0.219479	-0.0347308
YOR193W	YOR193W ... PEX27 peroxisome organization and bi molecular function unknown peroxisomal membrane | YOR194C	0.731785	0.344034	0.70084	1.06884	0.930521	1.08779	0	0.316016	0.262315	0.749027	0.978728	0.708442	1.11687	0	0.213528	0.650565	0.44718	0.707497	0.36086	0.66392
YOR389W	YOR389W ... YOR389W biological process unknown molecular function unknown cellular component unknown | YOR390W	0.205765	1.08282	1.33924	0.631892	1.80499	2.06689	0	0.893284	1.51586	1.76839	0.97435	1.65231	1.41859	0	-0.0758114	0.558503	0.350964	1.00932	0.0794474	0.53839
YPR006C	YPR006C ... ICL2 propionate metabolism* methylisocitrate lyase activity mitochondrial matrix | YPR007C	0.40421	0.0224473	1.48444	0.780143	0.478009	1.25954	0	1.43323	0.806635	1.81843	0.982697	0.812465	1.12581	0	0.414647	0.0879699	0.672307	0.414963	-0.299064	-0.558472
YML088W	YML088W ... UFO1 ubiquitin-dependent protein ca protein binding* cytoplasm* | YML089C	0.126404	0.606665	0.691148	0.557949	0.613331	1.0225	0	0.235792	0.349968	0.780135	0.656569	0.39784	0.921088	0	0.317786	0.575754	-0.0560714	0.189236	-0.208478	0.438708
YPL247C	YPL247C ... YPL247C biological process unknown molecular function unknown cytoplasm* | YPL248C	1.46467	1.5573	2.05239	1.15198	1.48072	1.45659	0	0.0423494	0.329429	2.0231	0.684176	0.975537	1.00306	0	0.720157	0.816082	1.08447	0.710311	0.0794474	0.0942247
YIL014W	YIL014W ... MNT3 O-linked glycosylation "alpha-1,3-mannosyltransferase activ"cellular component unknown | YIL015W	0.0166935	0.501829	0.739358	1.00589	1.24276	1.34661	0	0.236056	0.445888	0.435911	1.00306	1.12733	1.40814	0	0.362719	0.579072	0.488628	0.741236	0.756178	1.10871
YNL260C	YNL260C ... YNL260C biological process unknown molecular function unknown cytoplasm* | YNL261W	-0.305235	0.0589732	0.412173	1.13266	0.554373	1.10656	0	0.392753	0.321209	0.510905	0.910086	0.380534	1.1373	0	0.0483249	0.544828	-0.944491	-0.0204231	-0.0699302	0.501191
YBR214W	YBR214W ... SDS24 endocytosis* molecular function unknown cytoplasm | YBR215W	1.15752	1.12644	0.968744	-0.0104801	1.38023	0.921931	0	0.468504	0.701293	1.07961	-0.109259	0.805214	0.495099	0	0.333175	0.344771	0.435016	0.543044	-0.424028	-0.588389
YNL200C	YNL200C iESR cluster YNL200C biological process unknown molecular function unknown cytoplasm* | YNL201C	0.300087	0.561079	1.69713	0.716101	2.53618	1.77784	0	0.209985	0.965333	1.55568	0.429609	1.50016	0.904098	0	0.312333	0.754151	0.954165	0.858531	0.587334	0.16279
YLR097C	YLR097C ... HRT3 ubiquitin-dependent protein ca ubiquitin-protein ligase activity nuclear ubiquitin ligase complex | YLR098C	0.0870042	0.79376	0.86531	1.03438	0.717527	1.45596	0	-0.0141888	0.293728	0.993223	0.697295	0.583704	1.18567	0	0.291265	0.909211	0.437842	0.492966	0.098184	1.09238
YPL268W	YPL268W ... PLC1 pseudohyphal growth* phosphoinositide phospholipase C acnucleus* | YPL269W	0.533583	0.990493	1.00453	1.27116	0.855378	1.61473	0	0.297684	0.360789	1.208	0.99719	0.588697	0.981876	0	0.303139	0.971556	0.437842	0.53587	-0.234368	0.933417
YML005W	YML005W ... TRM12 biological process unknown S-adenosylmethionine-dependent methcytoplasm | YML006C	0.037582	0.477286	0.578625	0.862012	0.411147	1.19084	0	0.387084	0.258667	0.718269	0.943794	0.244902	1.12295	0	-0.312718	-0.149069	-0.0832088	0.404075	-0.0737988	0.751663
YOR262W	YOR262W ... YOR262W biological process unknown molecular function unknown cytoplasm | YOR263C	0.195569	0.640049	0.822402	0.822115	0.61151	1.24092	0	0.218233	0.488399	1.05727	0.846251	0.411663	1.00179	0	-0.320062	-0.120913	-0.120751	0.0834631	-0.114032	0.727246
YDR085C	YDR085C iESR cluster AFR1 signal transduction during con receptor signaling protein activitymating projection base | YDR086C	1.27973	1.36154	1.87759	1.62759	3.78138	4.39319	0	1.28086	1.01918	1.81269	0.829152	2.55703	2.46257	0	0.61311	1.50301	0.737402	1.17064	-0.059529	0.779398
YDR036C	YDR036C ... EHD3 endocytosis* 3-hydroxyisobutyryl-CoA hydrolase amitochondrion | YDR037W	0.273825	0.794684	1.27297	1.01023	1.07411	1.58961	0	0.151416	0.406456	1.56917	0.978055	0.784665	1.22025	0	-0.0447845	0.26267	0.772333	1.05173	0.0668106	0.721323
YLL041C	YLL041C ... SDH2 tricarboxylic acid cycle* succinate dehydrogenase (ubiquinonerespiratory chain complex II (sensu | YLL042C	0.834959	1.38533	1.83674	1.08115	2.22299	1.86234	0	0.66113	1.4452	1.59932	0.906876	1.42344	1.29279	0	0.425596	1.35173	0.643925	0.914186	0.574707	0.514754
YDR070C	YDR070C iESR cluster FMP16 biological process unknown molecular function unknown mitochondrion | YDR071C	0.663057	0.899065	3.70381	2.43503	2.96027	1.70432	0	0.444702	0.638399	3.48013	1.38719	2.01909	0.196195	0	-1.17603	-0.537913	1.59627	2.03486	0.742412	0.703449
YLR093C	YLR093C ... NYV1 vesicle fusion v-SNARE activity vacuolar membrane | YLR094C	0.131721	0.132346	0.952608	0.675563	0.863254	1.12764	0	0.489124	0.390602	1.06698	0.655249	0.416353	0.929329	0	0.49537	0.609659	-0.0560465	0.56823	-0.662871	0.207038
YER101C	YER101C ... AST2 biological process unknown molecular function unknown cytoplasm | YER102W	0.730401	0.885437	1.52865	0.624239	0.857272	1.59554	0	0.65106	0.193928	1.57677	0.427754	0.862513	1.13763	0	0.380101	0.451168	0.329269	0.264705	-0.00890843	0.815924
YDR358W	YDR358W iESR cluster GGA1 Golgi to vacuole transport molecular function unknown Golgi trans face | YDR359C	0.937439	1.16302	1.05806	0.727909	0.918989	1.25655	0	0.774795	0.746247	1.38559	0.680997	0.714313	0.611233	0	0.603372	1.33493	0.433542	0.827108	-0.715327	0.111379
YPL166W	YPL166W … iESR cluster ATG29 biological process unknown molecular function unknown | Autophagy-specific protein that is required for recruitment of other ATG proteins to the pre-autophagosomal structure (PAS); interacts with Atg17p and localizas to the PAS in a manner interdependent with Atg17p and Cis1p; not conservedYPL167C	0.312895	0.934985	0.767954	1.07829	0.942905	1.0225	0	0.269178	0.574783	1.21155	1.05024	0.886249	0.6637	0	-0.251235	0.305362	0.604492	0.867852	-0.386216	0.230961
YMR103C	YMR103C ... | YMR104C	1.2243	1.06825	2.17343	0.983736	1.78094	2.04042	0	1.15036	0.927727	1.70261	0.142227	1.0947	1.2893	0	0.184697	-0.0467986	-0.476428	0.607962	-0.106966	0.844493
YKR046C	YKR046C ... PET10 aerobic respiration molecular function unknown lipid particle | YKR047W	1.60835	0.959438	3.15779	1.23957	2.46657	1.77739	0	0.303943	0.958638	3.61639	0.535238	1.66741	0.196195	0	-1.14432	-0.468978	2.30034	1.80683	0.342482	0.248883
YDR061W	YDR061W ... YDR061W biological process unknown "ATPase activity, coupled to transme"mitochondrion | YDR062W	0.414462	0.699678	0.908271	1.06582	1.10751	1.15209	0	-0.0737698	-0.0678338	1.0318	0.69042	0.708821	0.856684	0	0.0988064	0.795317	0.383941	0.670855	0.468174	0.631006
YOR114W	YOR114W ... YOR114W biological process unknown molecular function unknown cellular component unknown | YOR115C	1.06968	0.807434	1.38655	1.11521	1.03321	1.63721	0	1.07631	0.559995	1.51558	1.24176	0.518037	1.22267	0	0.753582	0.233168	0.140042	0.57949	-0.15085	0.886313
YDR001C	YDR001C iESR cluster NTH1 response to stress* "alpha,alpha-trehalase activity" cytoplasm* | YDR002W	0.67683	1.23628	1.8226	1.24378	1.47613	1.39907	0	0.455946	0.699314	1.93595	0.575268	0.961748	0.930117	0	0.507757	1.42443	0.73461	1.02527	-0.0826259	0.289643
YGR212W	YGR212W ... SLI1 response to drug N-acetyltransferase activity plasma membrane* | YGR213C	0.672891	0.957733	2.40297	2.64697	1.00164	1.87976	0	0.458974	-0.138223	2.01059	1.90025	0.599661	1.12232	0	0.734001	0.802743	2.00945	1.91379	0.124771	1.1896
YJL079C	YJL079C ... PRY1 biological process unknown molecular function unknown endoplasmic reticulum* | YJL080C	1.46424	0.86754	1.4307	0.116303	1.228	1.25132	0	1.65386	1.70461	2.16057	0.0496198	0.536007	0.429992	0	-0.307291	-0.396958	1.82086	1.55588	0.336605	0.0638511
YJR149W	YJR149W ... YJR149W biological process unknown molecular function unknown cytoplasm | YJR150C	0.116839	0.729885	1.3774	0.863456	0.431845	1.64661	0	0.0687431	0.926031	1.92657	0.725822	-0.0267318	1.05745	0	-0.182288	0.364663	0.522427	0.792556	-0.0500854	0.814522
YJL082W	YJL082W ... IML2 biological process unknown molecular function unknown cytoplasm* | YJL083W	0.878937	1.57545	1.68177	1.03242	1.24445	1.56991	0	1.07623	1.43483	1.54529	0.471683	0.624257	0.754453	0	0.225229	0.822784	-0.312647	0.0768656	-1.17097	-0.692705
YJL161W	YJL161W iESR cluster FMP33 biological process unknown molecular function unknown mitochondrion | YJL162C	2.86469	1.64394	4.18724	2.51968	4.20851	2.94004	0	2.88891	1.54948	3.93132	1.6568	3.222	1.71433	0	1.44064	1.28061	1.56909	1.9492	0.927444	0.078958
YER077C	YER077C ... YER077C biological process unknown molecular function unknown mitochondrion | YER078C	0.339647	0.535603	0.87981	0.725819	0.57285	1.31999	0	0.748975	0.158937	0.952356	0.597299	0.387102	1.15272	0	0.440642	0.73132	0.101793	0.0701794	-0.363854	0.420574
YLR352W	YLR352W ... YLR352W biological process unknown molecular function unknown cellular component unknown | YLR353W	0.664362	0.833693	1.06119	0.819184	0.993734	1.55821	0	0.587097	0.56209	1.23843	0.899451	0.879788	1.16467	0	0.57994	0.832384	0.279133	0.492787	0.0366185	0.686847
YLR038C	YLR038C ... COX12 cytochrome c oxidase complex a cytochrome-c oxidase activity respiratory chain complex IV (sensu | YLR039C	-0.239646	0.563016	1.52828	0.850072	1.61333	0.486446	0	0.159553	0.584243	1.60781	0.812078	1.35613	0.627721	0	0.748765	0.184932	-0.28205	0.594287	1.25778	0.613294
YHR159W	YHR159W ... YHR159W biological process unknown molecular function unknown cytoplasm | YHR160C	0.185884	0.812755	0.87492	0.481332	0.557609	1.27489	0	0.364341	0.516339	0.807909	0.749466	0.611232	1.04733	0	0.151804	0.727489	0.125951	0.443727	-0.390038	0.591408
YKL161C	YKL161C ... YKL161C biological process unknown protein kinase activity cellular component unknown | YKL162C	1.25016	1.81029	2.63671	1.59083	2.21063	1.65118	0	1.4238	1.58424	2.41012	0.482771	0.96043	0.532682	0	-0.0447845	0.688563	0.270155	0.644913	-0.225407	-0.43034
YMR074C	YMR074C ... YMR074C biological process unknown molecular function unknown cytoplasm* | YMR075C-A	-0.307285	0.357305	0.937879	1.01914	0.682161	0.989607	0	0.107022	0.528076	0.61044	0.873479	0.250071	0.876893	0	0.0198246	0.294473	0.323863	0.163374	-0.07102	0.357674
YGR194C	YGR194C iESR cluster XKS1 xylulose catabolism xylulokinase activity cytoplasm | YGR195W	1.07838	1.40805	1.07621	0.937237	1.96924	1.75606	0	0.733184	0.665212	1.14078	0.830509	1.52874	1.3805	0	1.25751	1.44447	0.57521	0.672506	0.405854	0.505856
YLR035C	YLR035C ... MLH2 DNA repair molecular function unknown nucleus | YLR036C	0.180686	0.39127	0.884047	0.79156	0.518843	1.54606	0	0.131933	0.123826	1.10981	0.859046	0.705989	1.15555	0	-0.431808	0.188711	-0.0597596	0.737179	-0.541265	0.60252
YLL026W	YLL026W iESR cluster HSP104 response to stress* chaperone binding* cytoplasm* | YLL027W	0.728115	1.52947	1.53951	1.28326	0.976214	1.93002	0	-0.0142683	0.71352	1.87424	0.902822	1.40478	1.8667	0	0.188306	0.778733	1.01758	1.09275	-0.0939369	0.925591
YGL166W	YGL166W ... CUP2 transcription initiation from ligand-regulated transcription factnucleus | YGL167C	0.665889	0.478565	1.10686	0.568046	1.24411	1.28861	0	0.716802	0.176158	0.861147	-0.0566773	0.66072	0.930693	0	-0.512708	-0.220935	-0.573369	-0.257462	-0.479043	-0.0285265
YMR284W	YMR284W ... YKU70 chromatin assembly or disassem RNA binding* nuclear membrane* | YMR285C	-0.0111691	0.291634	0.773138	1.04225	0.69098	1.13653	0	0.377639	-0.159417	0.852616	0.918409	0.481675	0.72911	0	0.543021	0.750935	0.472672	0.839107	-0.478847	0.181405
YBR013C	YBR013C ... YBR013C biological process unknown molecular function unknown cellular component unknown | YBR014C	1.03834	1.63612	1.60228	1.19132	2.68541	3.33125	0	1.34208	1.51775	1.70596	1.31138	2.55006	3.13669	0	1.49127	1.97096	0.931041	1.08332	1.24937	2.11138
YLR225C	YLR225C ... YLR225C biological process unknown molecular function unknown cytoplasm | YLR226W	0.389415	0.496933	0.979774	1.23901	1.21501	1.34996	0	0.604859	0.483096	1.21432	1.13812	0.640335	1.01583	0	-0.0273674	0.43096	0.141969	0.738799	-0.388205	0.113228
YDR202C	YDR202C ... RAV2 vacuolar acidification* molecular function unknown RAVE complex | YDR203W	0.589193	0.806635	0.770003	0.785163	0.893459	1.69032	0	0.563366	0.12248	0.931578	0.386078	0.517443	1.13242	0	0.235711	0.355602	-0.0541876	0.0561185	-0.33559	0.84825
YMR173W	YMR173W iESR cluster DDR48 DNA repair ATPase activity* cytoplasm | YMR173W-A	1.47917	1.04993	2.91732	2.73143	2.83099	2.25696	0	1.72541	0.953477	3.14002	2.08154	2.76895	0.983202	0	2.04268	1.74197	2.0277	3.25861	1.17256	0.16142
YPL136W	YPL136W ... | YPL137C	-0.197826	0.67348	1.11685	1.04693	1.25245	0.829853	0	0.285642	0.948654	1.86408	2.41976	1.7967	1.02627	0	-0.73993	0.142526	0.14506	1.28943	0.66441	-1.92104
YJR078W	YJR078W ... BNA2 NAD biosynthesis "tryptophan 2,3-dioxygenase activity"cytoplasm | YJR079W	0.530872	0.974084	1.19181	1.6229	1.29309	1.52946	0	1.75342	1.97329	3.27911	2.74795	1.93688	1.63632	0	0.568192	1.28061	0.681113	1.81796	0.594021	-0.0815067
YPL110C	YPL110C … GDE1 biological process unknown molecular function unknown | Glycerophosphocholine (GroPCho) phosphodiesterase; hydrolyzes GroPCho to choline and glycerolphosphate, for use as a phosphate source and as a precursor for phosphocholine synthesis; may interact with ribosomesYPL111W	0.634312	1.0129	1.66701	1.09894	1.02178	1.8287	0	1.17703	0.7071	1.90868	1.07001	0.619523	0.968719	0	0.23961	0.801961	0.323671	0.706237	-0.841219	0.180105
YMR034C	YMR034C ... YMR034C biological process unknown sterol transporter activity cellular component unknown | YMR035W	1.61183	1.01944	1.53757	0.952293	1.93052	2.04635	0	1.65251	1.51775	1.72836	0.977756	1.55413	1.61123	0	0.132093	-0.685384	0.319197	0.407084	0.401376	0.726656
YCR073C	YCR073C ... SSK22 protein amino acid phosphoryla MAP kinase kinase kinase activity cellular component unknown | YCR073W-A	0.947054	1.16537	1.57147	1.14965	1.15076	2.09929	0	1.12709	0.765122	1.69788	0.636683	0.896234	1.31315	0	-0.19468	0.134692	0.129097	0.569044	-0.479453	0.703137
YIR039C	YIR039C iESR cluster YPS6 biological process unknown aspartic-type endopeptidase activitcell wall (sensu Fungi) | YIR040C	2.20514	3.28651	2.83865	1.54277	0.848644	0.916299	0	1.47456	2.52632	2.43136	1.55832	1.41306	1.08554	0	-1.21471	-0.554708	0.300338	0.913109	-0.230097	-0.152772
YDR148C	YDR148C ... KGD2 tricarboxylic acid cycle* dihydrolipoyllysine-residue succinymitochondrial matrix* | YDR149C	0.543747	0.827058	1.10489	0.568409	1.38336	1.48265	0	0.319415	0.540188	0.943786	0.561726	1.01919	1.15457	0	0.524976	0.628219	0.284341	0.360775	0.304594	0.420414
YPR079W	YPR079W ... MRL1 vacuolar transport signal sequence binding cytoplasm* | YPR080W	0.707183	0.655665	1.05294	1.13783	0.738731	1.45634	0	0.576213	0.395798	1.007	1.01812	0.519397	0.857341	0	0.23085	-0.00687246	0.391299	0.578824	-0.139955	0.300211
YHR171W	YHR171W iESR cluster ATG7 protein-vacuolar targeting* ubiquitin-like conjugating enzyme acytoplasm* | YHR172W	0.367771	0.691957	0.709491	0.63492	1.71662	1.5887	0	0.242015	0.304839	1.08758	0.799903	1.15548	1.2098	0	0.470637	0.636351	0.00195456	0.627247	0.606463	0.80244
YOR227W	YOR227W … HER1 biological process unknown molecular function unknown | Protein of unknown function required for proliferation or remodeling of the ER that is caused by overexpression of Hmg2p; may interact with ribosomes, based on co-purification experimentsYOR228C	0.303429	0.671066	0.811643	0.414511	0.685444	1.11431	0	0.132625	0.268415	0.762713	0.420514	0.530392	0.601477	0	0.126923	0.325366	0.423094	0.778625	-0.23984	0.273845
YGL156W	YGL156W iESR cluster AMS1 carbohydrate metabolism alpha-mannosidase activity vacuolar membrane | YGL157W	1.0348	1.08857	0.99061	0.57501	1.00338	0.886992	0	0.664835	0.931291	1.0436	0.755467	0.608167	0.556058	0	0.695672	1.30343	0.335349	0.909299	-0.906291	-0.588616
YBR053C	YBR053C iESR cluster YBR053C biological process unknown molecular function unknown cellular component unknown | YBR054W	0.22111	0.806953	1.29498	1.07274	1.57311	1.3231	0	-0.100034	0.459937	1.23615	0.750516	0.918865	0.906502	0	0.495784	0.74084	0.623551	0.825474	0.117736	0.181113
YJL141C	YJL141C iESR cluster YAK1 protein amino acid phosphoryla protein kinase activity cytoplasm* | YJL142C	0.82094	1.3181	1.46744	0.555899	1.39811	1.82888	0	0.432495	0.665116	1.67191	0.449877	0.974265	1.1344	0	0.323924	0.889086	0.28499	0.60389	-0.122186	0.617824
YHR209W	YHR209W … CRG1 biological process unknown S-adenosylmethionine-dependent | Putative S-adenosylmethionine-dependent methyltransferase; mediates cantharidin resistanceYHR210C	0.876999	1.05897	3.2986	2.32489	2.07389	2.62584	0	0.996854	0.979103	3.25953	1.20079	1.57071	2.02973	0	0.268003	0.594348	0.771175	1.29051	0.344275	1.11999
YIR016W	YIR016W ... YIR016W biological process unknown molecular function unknown cellular component unknown | YIR017C	0.889637	0.495339	1.26212	0.133168	0.944876	1.0702	0	0.291004	-0.145917	0.654671	-0.496675	0.367855	0.229485	0	-0.157259	-0.0622287	0.490511	0.510601	-0.863969	-0.20115
YNL239W	YNL239W ... LAP3 response to antibiotic transcription regulator activity* cytoplasm* | YNL240C	0.120576	0.465608	0.994539	0.766776	1.21055	1.86384	0	0.363727	0.461328	0.6281	0.723455	0.841806	1.39832	0	0.285364	0.343059	0.29476	0.529323	0.0859257	0.806979
YGL104C	YGL104C iESR cluster VPS73 protein-vacuolar targeting molecular function unknown mitochondrion | YGL105W	0.85805	0.946909	1.14284	1.0178	1.8247	1.38722	0	0.265363	1.02561	0.801242	0.72883	1.08127	0.896502	0	0.381694	0.610561	0.228309	0.139069	0.215224	0.154509
YBR222C	YBR222C ... PCS60 biological process unknown AMP binding cytoplasm* | YBR223C	1.13778	1.22478	1.35752	0.858071	1.32444	1.63393	0	0.760801	0.895445	1.40381	0.73651	0.755181	1.18342	0	0.19568	0.0843387	0.265114	0.688319	-0.122445	0.472988
YGL191W	YGL191W ... COX13 aerobic respiration enzyme regulator activity* respiratory chain complex IV (sensu | YGL192W	1.00136	1.84557	3.3503	1.79539	2.10045	2.82985	0	0.681013	1.28468	3.62948	0.787132	1.54393	1.02627	0	0.196224	1.17043	1.86669	1.95043	0.0794474	1.66392
YBR203W	YBR203W ... COS111 signal transduction molecular function unknown cellular component unknown | YBR204C	0.676289	1.26108	1.378	1.45779	1.20979	1.82144	0	1.46274	1.69219	1.2214	1.04727	0.693453	1.09635	0	0.321813	1.23985	0.566434	0.999128	-0.581528	0.302283
YIL107C	YIL107C iESR cluster PFK26 fructose 2,6-bisphosphate meta 6-phosphofructo-2-kinase activity cytoplasm | YIL108W	1.64488	1.7586	2.33076	1.51259	2.16934	2.8578	0	1.63668	1.66026	2.89615	1.39228	1.84689	2.05149	0	1.60862	2.33447	1.19017	1.66058	0.290378	1.30562
YOR020W-A	YOR020W-A ... YOR020W-A biological process unknown molecular function unknown cellular component unknown | YOR021C	0.558165	0.187078	1.1951	0.82005	1.32023	1.04111	0	0.350737	0.0499065	1.1663	0.586696	0.492917	0.579663	0	0.753027	0.363077	0.211502	0.269796	0.133219	0.271603
YNR016C	YNR016C ... ACC1 protein-nucleus import* acetyl-CoA carboxylase activity* mitochondrion* | YNR017W	0.16201	1.11035	1.12702	0.411215	0.544239	1.74025	0	0.0357303	0.209807	1.43492	0.33198	0.344219	1.01373	0	-0.154563	0.029116	0.34786	0.632393	0.0824141	0.998989
YBR094W	YBR094W … PBY1 biological process unknown molecular function unknown | Putative tubulin tyrosine ligase associated with P-bodiesYBR095C	0.257291	0.739963	1.01484	0.657737	0.844891	1.62567	0	0.351311	0.410663	1.00394	0.362706	0.537989	1.09502	0	-0.198286	0.134289	0.201382	0.242611	-0.0972177	0.75703
YDL019C	YDL019C ... OSH2 steroid biosynthesis oxysterol binding plasma membrane* | YDL020C	0.23669	0.692203	0.789827	0.489507	0.557533	1.2183	0	0.0928423	0.219377	0.855024	0.320013	0.463756	0.707615	0	-0.205826	0.213366	0.49576	0.649022	-0.432117	0.426673
YDR242W	YDR242W ... AMD2 biological process unknown amidase activity cellular component unknown | YDR243C	0.285195	0.814606	0.643498	0.515587	0.180499	1.28796	0	0.248201	0.479906	1.35809	0.530551	0.394599	1.3098	0	-0.167641	0.144098	0.249032	0.199795	-0.0747235	0.941454
YGL056C	YGL056C ... SDS23 biological process unknown molecular function unknown cytoplasm* | YGL057C	0.612684	0.838847	0.830035	0.632471	1.17992	1.7435	0	0.441225	0.402359	0.9217	0.215674	0.70474	1.07273	0	0.151213	0.0207795	-0.197267	0.397358	-0.063963	0.605138
YNR065C	YNR065C ... YSN1 biological process unknown molecular function unknown cellular component unknown | YNR066C	0.199238	0.608629	1.99787	0.565547	1.53122	1.94256	0	0.424695	0.201144	1.71104	-0.0786325	1.04062	1.2286	0	0.346005	0.492712	0.0069773	0.189258	-0.291963	0.450439
YKL121W	YKL121W … iESR cluster DGR2 biological process unknown molecular function unknown | Protein of unknown function; null mutant is resistant to 2-deoxy-D-glucose and displays abnormally elongated budsYKL122C	0.647879	0.810846	1.32342	0.718624	1.38051	2.50838	0	0.806444	0.602722	1.44004	0.430584	1.12747	1.75684	0	0.0854142	0.425474	0.790664	0.512555	0.0585888	1.4287
YGR256W	YGR256W iESR cluster GND2 glucose metabolism phosphogluconate dehydrogenase (deccytosol | YGR257C	0.658474	0.421543	1.54981	1.4875	0.915724	1.19583	0	0.568538	0.776888	2.31059	1.68029	0.929222	0.897946	0	-0.256289	-0.0519604	0.466988	1.10886	-0.405979	-0.0161993
YNL125C	YNL125C ... ESBP6 transport transporter activity* mitochondrion* | YNL126W	0.59922	0.706253	0.719048	0.669776	0.372226	1.25431	0	0.804798	1.0476	0.754932	0.57166	0.653894	1.24677	0	0.333377	-0.0353134	0.619216	0.894437	-0.0417833	0.628186
YPR184W	YPR184W iESR cluster GDB1 glycogen catabolism 4-alpha-glucanotransferase activitycytoplasm* | YPR185W	1.37945	1.62511	2.74995	0.974361	3.52259	3.4535	0	0.61217	1.14475	2.63952	0.815444	2.76843	1.68347	0	1.54381	2.15045	1.579	1.97986	0.118109	0.483024
YNR066C	YNR066C ... YNR066C biological process unknown molecular function unknown membrane fraction | YNR067C	0.6888	1.2289	2.28229	0.992449	1.38269	1.98027	0	0.771211	0.906171	2.15542	0.268763	0.953498	1.266	0	0.654461	0.91539	-0.0108264	0.329009	-0.119534	0.378518
YOR192C	YOR192C … THI72 transport transporter activity | Transporter of thiamine or related compound; shares sequence similarity with Thi7pYOR192C-C	0.760354	0.684578	1.09131	1.0739	0.476803	1.4938	0	0.585856	0.908133	1.17734	1.05816	0.670275	1.4857	0	0.0444829	-0.187938	0.459375	0.866366	-0.142945	1.11138
YNR002C	YNR002C … iESR cluster ATO2 transport* transporter activity mitochondrion* | Putative transmembrane protein involved in export of ammonia, a starvation signal that promotes cell death in aging colonies; phosphorylated in mitochondria; member of the TC 9.B.33 YaaH family; homolog of Ady2p and Y. lipolytica Gpr1pYNR003C	1.24578	1.05897	3.01731	0.731428	2.63096	1.8705	0	1.08155	0.584243	3.78037	0.464155	2.38166	1.02627	0	-0.0447845	-0.262527	0.537378	0.874395	0.66441	-2.24297
YHR037W	YHR037W ... PUT2 glutamate biosynthesis* 1-pyrroline-5-carboxylate dehydrogemitochondrion | YHR038W	1.26815	1.45249	2.05415	1.12234	3.87754	3.25696	0	0.725407	0.988737	2.19359	1.1229	3.14273	2.77801	0	0.608658	0.78974	1.6794	1.6073	2.18636	1.96878
YMR084W	YMR084W ... YMR084W biological process unknown molecular function unknown cellular component unknown | YMR085W	1.66082	2.45951	1.80158	1.16157	2.93052	1.43754	0	-0.281019	0.677352	2.11448	0.844259	3.15927	1.44131	0	0.0483249	0.379019	1.48293	0.396985	1.8868	1.07896
YIL017C	YIL017C ... VID28 negative regulation of glucone molecular function unknown cytoplasm* | YIL018W	0.391232	0.554248	0.808833	0.495914	0.920149	1.20672	0	0.19951	0.218847	1.08054	0.549044	0.508044	0.774139	0	0.360802	0.614814	0.311252	0.594287	-0.274879	0.247777
YJL132W	YJL132W iESR cluster YJL132W biological process unknown molecular function unknown membrane fraction | YJL133C-A	0.7895	1.30589	1.34644	0.737074	1.2378	1.34723	0	0.890307	1.5298	1.22397	0.601759	0.598391	0.234588	0	0.173396	0.617178	0.685769	0.718663	-0.0421145	0.147345
YOL117W	YOL117W ... RRI2 adaptation to pheromone during molecular function unknown signalosome complex | YOL118C	1.19883	1.51035	0.496234	0.994978	0.341983	1.04844	0	0.598609	0.574395	0.286445	0.534524	0.281444	0.6757	0	0.563209	0.828741	0.040546	0.777624	-0.814998	0.113446
YCR036W	YCR036W ... RBK1 D-ribose metabolism ATP binding* cytoplasm* | YCR037C	-0.147724	0.521945	0.981828	1.13393	1.18644	1.14092	0	-0.0328063	0.0612901	0.716656	0.600657	0.568319	0.8257	0	-0.0543073	0.545941	-0.0219851	0.560864	0.140848	0.493995
YLR133W	YLR133W ... CKI1 phosphatidylcholine biosynthes choline kinase activity cytosol | YLR134W	0.738363	1.47349	1.10611	1.03373	1.29226	1.71943	0	0.378764	0.551583	1.26656	0.662841	0.88954	1.35804	0	0.483962	1.05195	0.0820857	0.219304	-0.13797	0.620238
YCL035C	YCL035C iESR cluster GRX1 response to oxidative stress* thiol-disulfide exchange intermediacytoplasm* | YCL036W	0.0543878	0.365375	0.990858	1.02372	1.56407	1.0317	0	0.311051	0.570633	1.07815	0.71172	0.764964	0.705784	0	0.511762	0.954048	0.239948	0.335437	0.146682	0.0973073
YPL231W	YPL231W ... FAS2 fatty acid biosynthesis* phosphopantetheinyltransferase actimitochondrion* | YPL232W	0.186776	0.81927	1.16308	0.419333	0.230244	1.18972	0	0.303498	0.299022	1.7315	0.7325	0.190726	0.830611	0	-0.176586	0.0885331	0.507437	0.793254	-0.352123	0.461956
YDR533C	YDR533C iESR cluster HSP31 biological process unknown unfolded protein binding* soluble fraction | YDR534C	0.646896	1.1227	2.27718	2.3066	2.5239	1.55809	0	0.978981	1.00393	2.77898	1.77578	1.96381	1.07187	0	-0.171418	-0.0467986	1.21228	1.698	1.20075	0.703091
YHR006W	YHR006W ... STP2 positive regulation of transcr specific RNA polymerase II transcrinucleus | YHR007C	0.489052	0.438149	0.973438	0.572303	1.0014	1.79429	0	0.477136	0.193005	1.11704	0.124684	0.671302	1.25684	0	0.174661	0.124597	-0.32532	0.0734028	-0.859585	0.313013
YKR018C	YKR018C ... YKR018C biological process unknown molecular function unknown cytoplasm* | YKR019C	0.239288	0.896181	0.995077	0.782354	0.71202	1.27786	0	0.0546513	0.446552	0.975702	0.646786	0.593488	0.963524	0	0.348612	0.859986	0.227136	0.294734	-0.362123	0.416735
YGR153W	YGR153W ... YGR153W biological process unknown molecular function unknown cellular component unknown | YGR154C	0.312895	0.90697	1.26524	0.672534	0.0680245	0.69235	0	1.23355	0.806635	1.32093	2.14223	-0.010657	-0.0408439	0	-0.14432	0.415545	0.274343	0.712931	-0.920553	0.143088
YDR055W	YDR055W ... PST1 cell wall organization and bio molecular function unknown cell wall (sensu Fungi) | YDR056C	1.37	1.20902	3.47519	1.63028	3.15822	3.44054	0	0.815118	1.07745	4.15156	-0.369553	1.57999	0.950457	0	1.04726	1.30085	0.68956	1.05359	0.258153	0.657212
YLR324W	YLR324W ... PEX30 peroxisome organization and bi molecular function unknown peroxisome* | YLR325C	-0.145009	0.171832	1.0584	0.612202	0.712856	0.634178	0	-0.325359	0.552818	1.22688	0.798475	0.528332	0.748328	0	0.108196	0.481224	0.377039	0.648902	0.00494833	0.192359
YNL015W	YNL015W iESR cluster PBI2 vacuole fusion, non-autophagic endopeptidase inhibitor activity cytoplasm* | YNL016W	2.35744	2.65563	2.24666	2.55734	2.74644	2.93374	0	1.19069	1.73289	2.31296	2.47141	2.11174	2.41211	0	2.18671	2.3308	1.54938	1.97978	1.41164	1.94196
YGR019W	YGR019W iESR cluster UGA1 nitrogen utilization 4-aminobutyrate transaminase activiintracellular | YGR020C	0.345316	0.714979	1.0006	0.403379	1.42341	1.50256	0	-0.152115	0.308789	1.15318	0.240144	0.925909	0.820241	0	0.522766	0.712526	0.188655	0.451196	-0.490282	-0.0854919
YKL067W	YKL067W iESR cluster YNK1 purine nucleotide biosynthesis nucleoside-diphosphate kinase activcytosol* | YKL068W	0.470393	0.84814	1.34326	1.27138	1.64917	1.29209	0	0.0701641	0.343786	1.42041	0.965826	0.685444	0.714799	0	0.648518	0.849515	0.19259	0.480906	0.173775	-0.0995596
YHL021C	YHL021C … iESR cluster AIM17 biological process unknown molecular function unknown mitochondrion | Putative protein of unknown function; the authentic, non-tagged protein is detected in highly purified mitochondria in high-throughput studies; null mutant displays reduced frequency of mitochondrial genome lossYHL022C	2.41114	2.63663	2.80632	1.8705	3.44005	3.26587	0	1.28548	1.73187	2.91593	1.50294	2.93755	2.35546	0	1.21541	1.61194	1.23528	1.43286	0.123979	0.266474
YFL050C	YFL050C ... ALR2 magnesium ion transport* "di-, tri-valent inorganic cation tr"plasma membrane | YFL051C	0.877037	1.73705	2.09804	2.15816	1.43227	1.92385	0	0.648101	0.972313	1.47998	1.23309	0.561481	0.958366	0	-0.228496	0.685243	0.440804	0.975377	0.0406282	0.744539
YOL113W	YOL113W ... SKM1 protein amino acid phosphoryla protein serine/threonine kinase actcellular component unknown | YOL114C	0.0438077	0.50513	1.31637	1.02073	0.529005	1.19687	0	0.00521714	0.0420301	1.28482	0.77759	0.242837	0.584266	0	-0.00730978	0.371489	0.190927	0.746614	-0.0394299	0.455927
YNL014W	YNL014W ... HEF3 translational elongation ATPase activity* cytosolic ribosome (sensu Eukaryota | YNL015W	2.18967	1.95336	2.54227	1.55901	1.5231	2.58321	0	1.05952	0.850417	2.98693	2.12402	1.05646	1.75962	0	-0.0779513	0.576009	0.818114	1.67042	-0.688379	0.511917
YKL016C	YKL016C ... ATP7 protein complex assembly* structural molecule activity* "proton-transporting ATP synthase, s" | YKL017C	0.19626	0.836149	1.05767	0.808621	1.0432	1.28169	0	0.128	0.807869	0.980124	0.644413	0.759861	1.17443	0	0.347954	0.619618	0.318014	0.30399	0.300107	0.704278
YDL204W	YDL204W iESR cluster RTN2 biological process unknown molecular function unknown endoplasmic reticulum | YDL205C	-0.147528	0.151123	2.16266	0.852371	0.873093	1.10369	0	-0.238067	-0.0714926	1.97133	0.0159215	0.524182	0.94023	0	-0.203851	0.285122	1.08203	1.30282	0.00729766	0.492096
YPL089C	YPL089C ... RLM1 cell wall organization and bio DNA binding* nucleus | YPL090C	0.392957	0.477286	0.991002	0.705324	0.810734	1.40575	0	0.529298	0.497918	1.85998	-0.0983702	0.440573	0.892085	0	-0.227088	0.304841	-0.474257	0.318976	-0.575488	0.350667
YPR093C	YPR093C ... ASR1 response to ethanol molecular function unknown cytoplasm* | YPR094W	0.166979	0.202709	1.41841	0.846905	0.863407	0.668215	0	-0.28582	0.269928	1.24498	0.277742	0.134773	0.300893	0	-0.0116176	0.131752	-0.5781	0.0348593	-0.643019	-0.0678834
YER184C	YER184C ... YER184C biological process unknown molecular function unknown cellular component unknown | YER185W	-0.316814	0.662595	0.985911	0.477042	0.744571	0.922294	0	0.0344538	0.0330292	1.33604	0.557907	0.692361	0.72911	0	-0.563658	0.0425711	-0.0896081	0.226512	-0.549804	-0.24141
YOR208W	YOR208W ... PTP2 protein amino acid dephosphory protein tyrosine phosphatase activinucleus | YOR209C	0.973041	1.2731	1.56005	0.93279	1.15823	2.108	0	0.841765	0.79283	2.03328	0.506121	0.620408	1.22604	0	-0.00370854	0.332583	0.0463912	0.48593	-0.651793	0.450494
YDL244W	YDL244W ... THI13 thiamin biosynthesis molecular function unknown cellular component unknown | YDL245C	-0.239646	2.64394	1.72781	1.57456	0.574377	1.13798	0	0.555482	1.99928	2.42222	2.79322	1.4812	1.86757	0	-1.62975	0.000507	1.13684	1.02794	0.249372	0.886313
YHR071W	YHR071W ... PCL5 cell cycle cyclin-dependent protein kinase regcyclin-dependent protein kinase hol | YHR072W	0.673708	1.7019	1.88931	2.23262	0.900147	1.92632	0	1.03824	1.26642	1.84851	2.01656	1.17465	1.96432	0	-0.11368	0.141265	0.333019	0.459046	0.252182	1.0873
YDR186C	YDR186C ... YDR186C biological process unknown molecular function unknown cytoplasm | YDR187C	0.751611	1.07254	1.26238	1.33844	1.08161	1.98097	0	0.653933	0.430416	1.37252	1.12248	0.632099	1.29661	0	0.320495	0.576607	0.13743	0.68153	-0.175294	0.918421
YJR052W	YJR052W ... RAD7 nucleotide-excision repair, DN DNA binding* repairosome* | YJR053W	0.947232	0.765926	0.56751	0.920564	1.84186	2.03777	0	1.26393	0.632917	0.549203	0.482621	1.44094	1.62481	0	0.600299	0.252894	0.0195293	0.464273	0.17196	0.840273
YGL144C	YGL144C ... ROG1 lipid metabolism lipase activity cellular component unknown | YGL145W	0.681365	1.16815	0.941861	0.818111	1.12862	1.70758	0	0.731177	0.61722	1.3246	0.875691	1.03997	1.25294	0	-0.234055	0.324102	0.173494	0.29958	-0.213881	0.369827
YPR115W	YPR115W ... YPR115W biological process unknown molecular function unknown cytoplasm | YPR116W	0.84966	0.813134	1.01443	0.824537	0.525027	2.01887	0	0.369096	-0.0714723	1.04017	0.678006	0.137831	0.971655	0	0.542789	0.591514	0.222153	0.738776	-0.0524812	1.24049
YJR073C	YJR073C ... OPI3 phosphatidylcholine biosynthes phosphatidyl-N-methylethanolamine Nmitochondrion* | YJR074W	2.33771	2.76839	2.39527	2.34676	2.8608	2.76231	0	1.04156	1.66974	2.40748	2.00637	2.00439	2.42852	0	1.74885	1.85306	1.22331	1.17737	1.54563	1.56749
YGL163C	YGL163C ... RAD54 chromatin remodeling* DNA-dependent ATPase activity* nucleus | YGL164C	0.75504	0.883887	0.832889	1.05048	0.296103	1.25419	0	1.25853	0.527529	1.06113	0.962659	0.123141	1.13621	0	0.475083	0.924956	0.299514	0.670418	-0.537525	0.635351
YFR052C-A	YFR052C-A … Dubious Dubious open reading frame unlikely to encode a functional protein, based on available experimental and comparative sequence dataYGL014C-A	0.747178	2.3329	2.44006	1.6039	4.09768	3.5204	0	-0.262404	1.08417	2.08889	1.42922	3.4397	2.98172	0	2.54454	3.70095	2.10853	1.98563	2.96293	2.63769
YHR008C	YHR008C ... SOD2 replicative cell aging* manganese superoxide dismutase actimitochondrion* | YHR009C	1.00477	0.725905	1.72513	0.146465	2.10684	0.674575	0	0.45436	0.797092	2.52674	-0.632707	1.34549	-0.156594	0	-0.0671523	-0.773933	1.31231	1.09852	0.479985	0.146072
YBR126C	YBR126C iESR cluster TPS1 response to stress* "alpha,alpha-trehalose-phosphate syn"cytoplasm* | YBR127C	0.703158	1.38677	1.57747	0.881865	1.99451	1.47975	0	-0.365175	0.449942	1.47377	0.466997	1.22004	0.903927	0	0.646608	1.2968	0.847659	0.890322	0.33292	0.190023
YJL066C	YJL066C iESR cluster MPM1 biological process unknown molecular function unknown mitochondrion* | YJL067W	0.939677	1.45476	0.966159	0.979723	1.57506	1.68146	0	0.603882	1.01226	0.935547	0.591202	1.02316	1.11657	0	0.955216	1.60275	0.722117	0.829532	-0.175626	0.146386
YOR245C	YOR245C ... DGA1 triacylglycerol biosynthesis* diacylglycerol O-acyltransferase aclipid particle | YOR246C	0.253094	0.832423	1.11498	0.966556	1.13507	1.24406	0	0.29085	0.483966	1.10191	0.643929	0.523433	0.636324	0	-0.188574	-0.175919	0.410315	0.721199	0.00517469	0.300516
YLR362W	YLR362W ... STE11 protein amino acid phosphoryla MAP kinase kinase kinase activity cytoplasm | YLR363C	0.18796	0.63076	0.804396	0.84396	0.545857	1.28081	0	0.309087	0.124811	0.999006	0.59258	0.483513	0.629969	0	-0.245697	0.423718	0.0371123	0.318783	-0.370805	0.41776
YMR293C	YMR293C … HER2 aerobic respiration amidase activity | Subunit of the trimeric GatFAB AmidoTransferase(AdT) complex; involved in the formation of Q-tRNAQ; required for remodeling of ER caused by Hmg2p overexpression; similar to bacterial GatA glutamyl-tRNA amidotransferaseYMR294W	0.517083	0.647103	0.579192	0.72747	1.05198	1.4246	0	0.245938	0.445682	0.711025	0.535998	1.21452	0.995019	0	0.0514308	0.51508	0.523572	0.786932	0.312938	0.744091
YFR010W	YFR010W ... UBP6 protein deubiquitination ubiquitin-specific protease activitproteasome regulatory particle (sen | YFR011C	0.037324	0.42686	0.669756	0.812206	0.464463	1.0474	0	-0.0882461	0.112365	0.699291	0.547745	0.245564	0.808058	0	0.15578	0.671626	0.121222	0.378835	-0.201025	0.49478
YLL054C	YLL054C ... YLL054C biological process unknown transcriptional activator activity plasma membrane | YLL055W	0.293654	0.660288	0.916261	0.736446	0.740995	1.56771	0	0.649497	0.395508	1.06129	0.653598	0.736112	1.33876	0	0.0533005	0.202466	0.150354	0.343124	-0.144768	0.845415
YBL064C	YBL064C iESR cluster PRX1 regulation of cell redox homeo thioredoxin peroxidase activity mitochondrion | YBL065W	1.43768	1.53981	2.38636	1.11075	3.5097	3.03766	0	1.06456	1.69065	2.14472	0.41863	2.47683	1.77134	0	2.07801	2.52546	1.93921	2.04222	1.66825	1.44885
YNL012W	YNL012W ... SPO1 meiosis phospholipase activity nucleus | YNL013C	0.70377	0.924672	1.75428	1.49439	0.887452	1.73299	0	0.845997	1.10237	3.30481	1.35265	0.545736	1.69612	0	-1.04478	-0.75438	0.78249	1.57543	-0.423053	-0.210549
YGL124C	YGL124C ... MON1 protein-vacuolar targeting* molecular function unknown cytosol* | YGL125W	0.0689403	0.381632	1.11885	0.835402	0.553226	0.78046	0	0.077521	-0.10156	1.02875	0.268796	0.278217	0.506833	0	-0.014914	0.369152	0.0358311	0.343574	-0.483094	-0.0106308
YKL064W	YKL064W ... MNR2 magnesium ion transport magnesium ion transporter activity membrane | YKL065C	0.26028	0.452068	1.13266	0.712919	0.28622	1.14507	0	0.273968	0.0639179	1.34639	0.714434	0.257115	0.955917	0	0.411995	0.747162	0.163085	0.529989	-0.428362	0.563145
YML035C	YML035C ... AMD1 purine nucleotide metabolism AMP deaminase activity cytoplasm | YML036W	0.457864	0.67498	0.926668	0.55408	0.634389	1.3338	0	0.539297	0.413971	1.01738	0.49671	0.706089	1.12227	0	0.16459	0.364311	0.178766	0.464253	-0.406723	0.380895
YKL104C	YKL104C ... GFA1 cell wall chitin biosynthesis glutamine-fructose-6-phosphate trancellular component unknown | YKL105C	0.560471	0.742168	0.779471	0.837489	0.374904	1.19803	0	0.0148247	0.0285417	0.840704	0.519923	0.135332	0.589329	0	0.127132	0.232137	-0.038317	0.211694	-0.396218	0.265351
YBR073W	YBR073W ... RDH54 meiotic recombination* DNA-dependent ATPase activity* nucleus | YBR074W	0.491651	0.974084	0.879116	0.943294	0.286859	1.56338	0	0.282228	0.244014	1.2352	0.297331	-0.120445	0.787083	0	-0.122263	0.324858	0.170839	0.173955	-0.33559	0.741923
YJR120W	YJR120W ... YJR120W mitochondrion organization and molecular function unknown cellular component unknown | YJR121W	1.23166	1.49889	0.837764	1.70424	1.33651	1.63917	0	0.644487	1.23061	0.92015	1.38323	1.25238	1.79181	0	0.196224	0.606228	-0.110321	1.44686	0.711716	0.564385
YLR346C	YLR346C ... YLR346C biological process unknown molecular function unknown mitochondrion | YLR347C	-0.57593	0.22047	1.39895	1.12131	0.864933	0.752578	0	0.509033	1.00627	2.3491	1.15673	0.789044	0.913176	0	0.446751	0.773438	-0.290441	0.365945	-0.489574	-0.268965
YGL229C	YGL229C ... SAP4 G1/S transition of mitotic cel protein serine/threonine phosphatascytoplasm* | YGL230C	0.675022	0.561079	0.76428	0.824537	1.10364	1.64908	0	0.223773	0.527212	0.867761	1.45118	1.36653	1.55136	0	0.603743	0.764067	0.499242	0.87262	-0.205596	0.432901
YOL025W	YOL025W ... LAG2 replicative cell aging molecular function unknown mitochondrion | YOL026C	0.353444	0.936116	0.891073	0.50814	0.693271	1.69775	0	0.747516	0.994365	1.02604	0.647612	1.01571	1.52771	0	0.441806	0.945493	0.221934	0.242695	-0.0897387	0.751383
YDL149W	YDL149W ... ATG9 protein-vacuolar targeting* molecular function unknown cytoplasm* | YDL150W	0.365494	0.408422	0.772895	0.591593	0.855559	1.3976	0	0.111713	-0.0367888	1.05189	0.35357	0.416881	0.506159	0	0.736206	0.800208	0.157304	0.565348	-0.397785	0.426091
YDR231C	YDR231C ... COX20 aerobic respiration* unfolded protein binding mitochondrial inner membrane | YDR232W	0.24417	0.40447	1.02845	0.885291	0.803286	1.16416	0	0.462373	0.248101	0.807957	0.476792	0.450477	1.0769	0	0.286132	0.332583	0.689381	0.533175	-0.068398	0.686641
YLR270W	YLR270W iESR cluster DCS1 deadenylylation-dependent deca "hydrolase activity, acting on acid"cytoplasm* | YLR271W	0.540916	1.15352	1.34246	1.02822	2.02686	1.9274	0	0.250161	0.699366	1.23263	0.738769	1.25302	1.44553	0	0.778882	1.33162	0.725319	0.894968	0.419274	0.79144
YNL294C	YNL294C ... RIM21 sporulation (sensu Fungi)* molecular function unknown cellular component unknown | YNL295W	-0.231033	0.406345	1.33861	0.594303	0.815044	0.649096	0	-0.118105	0.642558	1.23268	0.105859	0.237017	0.515522	0	-0.0447845	0.570921	-0.0100289	0.36094	-0.644708	-0.150356
YPR001W	YPR001W ... CIT3 tricarboxylic acid cycle* citrate (Si)-synthase activity mitochondrial matrix | YPR002C-A	0.438426	0.643936	1.81249	1.2902	2.44509	1.72294	0	1.81852	1.45871	2.90023	2.40682	2.53954	2.05602	0	0.21825	1.17043	1.11288	1.06704	1.66441	0.741923
YGL180W	YGL180W iESR cluster ATG1 autophagy protein serine/threonine kinase actcytosol | YGL181W	0.524234	1.13914	0.681809	0.915615	1.03356	1.68323	0	0.531869	0.739988	1.08378	0.961344	0.721347	1.27509	0	0.607292	1.20945	0.241544	0.769736	0.128151	0.876581
YMR191W	YMR191W ... SPG5 biological process unknown molecular function unknown cellular component unknown | YMR192W	0.817406	0.97177	1.18071	1.16942	1.19499	1.49427	0	0.574306	0.798687	1.52608	1.10505	0.999611	1.1533	0	0.278767	0.329815	0.515823	0.86841	0.641326	0.729402
YFL030W	YFL030W ... AGX1 glycine biosynthesis alanine-glyoxylate transaminase actmitochondrion | YFL031W	0.345316	0.397956	1.2953	0.442667	0.0300567	0.276255	0	-0.0990214	0.249259	1.82682	0.863861	0.53954	0.0807181	0	-0.274266	0.217318	0.780234	0.94563	0.272093	0.587972
YOR003W	YOR003W ... YSP3 protein catabolism peptidase activity cellular component unknown | YOR004W	0.734359	0.841382	2.23412	1.43119	1.74995	0.970031	0	0.33309	0.79283	2.77255	1.54529	1.03116	0.803878	0	0.235323	0.874976	0.830425	1.50741	0.946181	0.557005
YOR386W	YOR386W ... PHR1 photoreactive repair deoxyribodipyrimidine photo-lyase anucleus* | YOR387C	0.502703	1.32665	0.915215	0.668504	1.08703	1.75731	0	0.434601	0.581137	0.944213	0.457003	0.652308	1.2548	0	-0.00489175	0.933836	0.236208	0.957527	-0.220113	0.858359
YMR278W	YMR278W … PGM3 biological process unknown molecular function unknown | Phosphoglucomutase, catalyzes interconversion of glucose-1-phosphate and glucose-6-phospate; transcription induced in response to stress; green fluorescent protein (GFP)-fusion protein localizes to the cytoplasm and nucleus; non-essentialYMR279C	1.15759	1.91684	1.24601	0.939696	1.40689	1.92019	0	0.690473	1.18048	1.01938	0.446383	0.842098	1.14557	0	0.0324912	0.748463	0.58804	0.701792	0.134815	0.835687
YLR252W	YLR252W iESR cluster | YLR253W	1.01189	1.12171	1.76147	1.37473	2.22598	2.03957	0	0.918052	0.972313	1.27699	0.537218	0.851839	0.540843	0	0.469789	0.415545	0.75977	0.666077	0.867943	0.38708
YFR053C	YFR053C iESR cluster HXK1 glucose metabolism* hexokinase activity cytosol | YFR054C	1.06053	1.96383	2.08082	1.67349	3.38812	3.16753	0	-0.000911	0.877987	1.76023	1.59591	2.88516	2.62028	0	2.73825	3.26325	1.63941	2.02782	2.21259	2.32355
YDL025C	YDL025C ... YDL025C biological process unknown protein kinase activity cellular component unknown | YDL026W	0.613351	0.827768	1.28606	1.15762	1.14307	1.95267	0	0.546437	0.527659	1.21106	0.658365	0.834065	1.31307	0	0.641716	0.859763	0.437842	0.652762	-0.291559	0.658954
YPR010C-A	YPR010C-A … Putative protein of unknown function; conserved among Saccharomyces sensu stricto speciesYPR137C-A	1.16635	1.32201	3.26524	1.48967	2.20354	1.62584	0	1.19703	1.11476	2.99901	1.54787	1.70206	1.08072	0	0.333727	-0.0484025	1.68938	0.96143	0.494485	0.422912
YJR082C	YJR082C ... EAF6 biological process unknown molecular function unknown nucleus* | YJR083C	0.585267	0.699645	0.655425	0.86091	0.906389	1.51348	0	0.666513	0.494412	0.874343	0.632032	0.585656	1.30063	0	0.400841	0.633874	-0.379099	-0.334698	0.00939995	0.829507
YGL036W	YGL036W ... YGL036W biological process unknown molecular function unknown cytoplasm | YGL037C	0.798298	1.03721	1.34658	0.514879	0.421326	1.20705	0	0.210485	0.266167	1.31651	-0.0278706	0.0520787	0.741541	0	0.396559	0.61852	0.395697	0.380086	-0.682885	0.321858
YKL148C	YKL148C ... SDH1 tricarboxylic acid cycle* succinate dehydrogenase (ubiquinonerespiratory chain complex II (sensu | YKL149C	0.584607	0.984973	1.08603	0.28067	0.999148	0.607461	0	0.290066	1.11655	1.16697	0.565315	0.917288	0.884026	0	0.274166	0.678094	0.950214	0.864553	0.0190116	-0.21309
YNL023C	YNL023C ... FAP1 biological process unknown transcription factor activity cellular component unknown | YNL024C	0.530084	0.948345	0.619349	0.632816	0.194794	1.27915	0	0.621375	0.385245	1.04714	0.615334	0.368617	1.07271	0	-0.493543	-0.139157	-0.258005	0.212444	-0.41543	0.861053
YPR049C	YPR049C ... ATG11 protein-vacuolar targeting* molecular function unknown extrinsic to membrane | YPR050C	0.744162	0.832746	1.22748	0.605328	0.722279	2.06751	0	0.799064	0.491984	1.93703	0.712897	0.700483	1.22525	0	0.164669	0.314754	0.125252	0.537048	-0.558845	0.643456
YAL049C	YAL049C … AIM2 biological process unknown molecular function unknown | Cytoplasmic protein involved in mitochondrial function or organization; null mutant displays reduced frequency of mitochondrial genome loss; potential Hsp82p interactorYAL051W	0.0578977	0.542338	0.537704	0.922003	0.660432	1.61311	0	-0.316571	0.213405	0.991701	0.787493	0.430533	1.14044	0	-0.399317	-0.167616	0.378341	1.10575	0.266216	0.819314
YBR056W-A	YBR056W-A ... YBR056W-A biological process unknown molecular function unknown cellular component unknown | YBR057C	1.64171	0.86515	2.24761	0.300975	2.07045	2.57094	0	1.61498	1.03992	2.62049	1.12502	1.50124	2.04419	0	-0.122787	-1.54381	0.251975	-0.73663	0.534013	0.341992
YDR330W	YDR330W ... UBX5 ubiquitin-dependent protein ca molecular function unknown cytoplasm* | YDR331W	0.702638	0.567314	0.740204	0.576118	0.530773	1.32533	0	0.613697	0.0361172	1.03816	0.552487	0.455347	1.12747	0	0.721582	0.900749	0.339164	0.502226	-0.329017	0.698448
YOR120W	YOR120W ... GCY1 response to salt stress* aldo-keto reductase activity cytoplasm* | YOR121C	0.779983	0.974084	2.4525	1.65996	1.36116	1.69026	0	0.582888	0.489606	2.03169	0.775552	0.595064	1.08004	0	1.04152	1.04282	0.807076	1.09071	0.555885	0.984631
YPL152W	YPL152W iESR cluster RRD2 response to osmotic stress* protein phosphatase type 2A regulatcytosol* | YPL152W-A	0.377025	0.909596	0.867465	0.721529	1.27291	1.01144	0	0.207559	0.862959	0.926026	0.744461	0.864983	0.777482	0	0.274393	1.04323	0.455296	0.498709	0.20873	0.353874
YJR130C	YJR130C ... STR2 sulfur metabolism cystathionine gamma-synthase activicytoplasm* | YJR131W	0.348723	0.461282	0.76677	0.948795	0.482786	0.8222	0	0.745054	0.419184	1.20336	0.773398	0.914704	1.32395	0	-0.173109	0.225682	-0.428189	0.196233	-0.635461	-0.192114
YMR196W	YMR196W iESR cluster YMR196W biological process unknown molecular function unknown cytoplasm | YMR197C	1.37694	2.07498	1.5633	1.32153	3.46161	3.13314	0	0.792044	1.21399	1.42509	0.89115	2.68001	2.14735	0	0.767807	1.6939	1.01293	1.70381	0.677607	0.624446
YFL042C	YFL042C ... YFL042C biological process unknown molecular function unknown cellular component unknown | YFL044C	0.337521	0.947842	0.755941	0.398124	0.865264	1.39916	0	0.359501	0.606185	0.883269	0.375579	0.587754	0.877385	0	0.442545	1.09478	-0.0413619	0.299872	-0.996055	-0.0358506
YNL257C	YNL257C ... SIP3 transcription initiation from transcription cofactor activity nucleus | YNL258C	0.560622	0.996295	0.829599	0.759032	0.448767	1.53009	0	0.429882	0.448466	0.728408	0.799572	0.446798	1.08043	0	0.692942	0.994013	0.00791021	0.266757	-0.36543	0.607652
YEL041W	YEL041W … YEF1 biological process unknown molecular function unknown | ATP-NADH kinase; phosphorylates both NAD and NADH; homooctameric structure consisting of 60-kDa subunits; sequence similarity to Utr1p and Pos5p; overexpression complements certain pos5 phenotypesYEL042W	0.162452	0.842015	0.504979	1.12832	0.919714	0.149132	0	0.454105	0.556762	0.806361	1.55931	1.51571	0.880138	0	-0.0839551	0.412138	0.505669	1.01575	0.741279	0.0522406
YIL045W	YIL045W iESR cluster PIG2 biological process unknown protein phosphatase regulator activcytoplasm | YIL046W	1.70225	2.36765	3.11912	2.19435	4.28618	4.81691	0	0.716266	0.90342	2.99332	1.20403	2.27036	1.95003	0	0.661484	1.51508	1.17481	1.70761	0.0480833	0.719416
YBR297W	YBR297W ... MAL33 regulation of transcription, D transcription factor activity nucleus | YBR298C	2.53796	3.14401	0.754279	1.07246	2.2829	2.44283	0	3.17439	3.99283	1.16128	1.36228	2.76052	2.77801	0	2.39579	3.46928	1.41808	2.16197	1.27689	1.47531
YHR112C	YHR112C iESR cluster YHR112C sulfur metabolism cystathionine beta-lyase activity cytoplasm | YHR113W	1.04403	1.04844	1.13213	1.02741	1.72538	1.93285	0	1.20891	0.996655	0.968814	1.0063	1.31085	1.53711	0	0.917652	0.792037	0.551536	0.715753	0.339291	0.824029
YGR168C	YGR168C ... YGR168C biological process unknown molecular function unknown cellular component unknown | YGR169C	0.192305	0.548076	0.872923	0.713893	0.865815	1.07197	0	-0.00251344	0.449313	1.28476	0.835403	0.828878	0.927932	0	0.134186	0.559474	-0.0613907	0.302473	0.365499	0.477122
YBR287W	YBR287W iESR cluster ZSP1 biological process unknown molecular function unknown endoplasmic reticulum | YBR288C	-0.18504	0.172076	1.32444	0.549796	0.853463	1.39432	0	-0.0932655	0.351337	1.23864	0.120938	0.289903	0.563244	0	0.224835	0.282405	0.230297	0.540042	-0.187996	0.532549
YKR091W	YKR091W ... SRL3 nucleobase, nucleoside, nucleo molecular function unknown cytoplasm | YKR092C	0.826268	1.04116	1.26867	0.935849	2.04447	1.58706	0	0.821446	1.00966	1.49437	0.0619721	1.04134	1.02333	0	1.06798	1.31722	0.0404253	0.508677	0.484524	0.421129
YBR056W	YBR056W iESR cluster YBR056W biological process unknown molecular function unknown cytoplasm | YBR056W-A	0.663057	1.02734	1.32177	0.90539	1.25525	1.48498	0	0.58357	0.644833	1.44239	0.88266	0.839366	1.00449	0	1.02573	1.41588	0.570852	0.747592	-0.123661	0.336377
YBR085C-A	YBR085C-A ... YBR085C-A biological process unknown molecular function unknown cytoplasm* | YBR085W	1.22271	1.28903	1.99403	1.20386	1.93437	2.60572	0	0.340277	0.191926	2.61709	0.248321	1.19477	1.63194	0	-0.541292	-0.743072	-0.299253	0.0604586	-0.254079	0.315681
YKL087C	YKL087C ... CYT2 cytochrome c-heme linkage holocytochrome-c synthase activity mitochondrial intermembrane space | YKL088W	0.357389	0.473172	0.893507	0.857226	0.479537	1.08021	0	0.423545	0.44338	0.838541	0.29259	0.730176	1.0506	0	-0.267177	0.000507	0.188303	0.520286	-0.332366	0.433874
YDL020C	YDL020C ... RPN4 ubiquitin-dependent protein ca transcriptional activator activity proteasome regulatory particle (sen | YDL021W	0.375482	0.661027	0.387837	0.208314	0.457352	1.12276	0	0.459009	0.418143	0.97692	0.139813	0.525673	1.04257	0	0.741352	0.793074	-0.31402	-0.0383655	-0.0144513	0.737921
YDR074W	YDR074W iESR cluster TPS2 response to stress* trehalose-phosphatase activity mitochondrion* | YDR075W	0.535581	1.02517	1.19095	0.287025	0.805524	1.32627	0	0.0739776	0.261381	1.12045	-0.0995508	0.377125	0.57012	0	0.364577	0.812387	0.48788	0.518158	-0.704041	-0.0361271
YOR185C	YOR185C iESR cluster GSP2 nuclear organization and bioge GTPase activity nucleus | YOR186W	2.17704	2.5325	2.51612	1.79603	4.59862	4.3072	0	1.48078	1.83731	2.65917	1.35235	3.32345	3.10892	0	1.70273	2.14611	1.36685	1.71513	2.01059	2.15194
YKR049C	YKR049C iESR cluster FMP46 biological process unknown molecular function unknown mitochondrion | YKR050W	1.22091	1.91837	2.61034	1.43971	2.88227	1.55648	0	0.872964	1.82613	2.48573	0.748543	1.23327	0.631132	0	-0.575299	0.550704	0.406325	0.551119	0.240911	-0.69865
YBR003W	YBR003W ... COQ1 ubiquinone metabolism trans-hexaprenyltranstransferase acmitochondrion | YBR004C	0.479267	0.828427	0.808727	0.801754	1.41998	1.80011	0	0.0631616	0.381636	0.448313	0.519296	0.867234	1.35719	0	0.462545	0.662594	0.594563	0.533968	0.188284	0.886313
YOL082W	YOL082W iESR cluster ATG19 protein-vacuolar targeting protein binding cytoplasm* | YOL083W	0.76346	0.849939	0.932659	0.962684	1.51955	1.70799	0	0.518956	0.839802	1.10226	0.868869	0.922617	1.06298	0	0.930125	1.4046	0.577158	0.985898	-0.274416	0.365758
YHR137W	YHR137W iESR cluster ARO9 aromatic amino acid family met aromatic-amino-acid transaminase accytoplasm* | YHR138C	2.13887	1.8821	2.3205	2.66279	2.52405	3.0388	0	2.24254	2.19769	3.16893	2.41976	2.43938	2.71659	0	3.03701	2.59775	2.63484	3.08239	1.85706	2.67481
YPL017C	YPL017C … IRC15 biological process unknown S-adenosylmethionine-dependent | Microtubule associated protein; regulates microtubule dynamics; required for accurate meiotic chromosome segregation; null mutant displays large budded cells due to delayed mitotic progression, increased levels of spontaneous Rad52 fociYPL018W	2.45514	2.84557	2.7899	1.50492	3.52831	4.18669	0	1.32819	2.56	2.74794	0.957726	2.67384	2.91936	0	0.301391	0.807862	1.49674	0.681439	1.48155	1.88631
YOR319W	YOR319W ... HSH49 nuclear mRNA splicing, via spl RNA binding snRNP U2 | YOR320C	-0.0854753	0.692571	0.851303	0.900381	0.921804	1.654	0	0.435659	0.385697	1.0115	0.68995	0.199266	1.18829	0	-0.413566	0.138011	0.0611214	0.430788	-0.0382041	1.15385
YDR379C-A	YDR379C-A ... YDR379C-A biological process unknown molecular function unknown mitochondrion | YDR379W	0.54885	1.17517	0.654743	0.606946	2.18926	1.73871	0	0.52901	0.903065	1.17055	0.530792	1.4172	1.14175	0	0.865018	1.76056	0.229949	0.344709	-0.103417	0.241229
YBR204C	YBR204C iESR cluster YBR204C biological process unknown serine hydrolase activity lipid particle | YBR205W	0.551575	1.1227	0.994156	0.925878	0.942628	1.32715	0	0.359625	0.543335	1.13484	0.994527	0.648036	0.933161	0	-0.0106363	0.909258	0.496998	0.696078	-0.0653691	0.394
YPR081C	YPR081C ... GRS2 glycyl-tRNA aminoacylation glycine-tRNA ligase activity cytoplasm | YPR082C	0.45841	0.651897	0.961915	1.14908	1.32418	1.66118	0	0.380595	0.0715693	1.37142	0.838607	0.883733	1.06675	0	0.295601	0.654138	0.0800032	0.773796	-0.094727	0.326268
YDR374W-A	YDR374W-A YDR374W-A YDR461C-A	0.750573	1.11124	0.9005	1.54998	1.27291	1.42665	0	1.23111	1.06767	1.49015	1.49949	0.976404	1.27933	0	0.578652	0.146897	0.449247	0.835295	0.348908	0.173423
YGR016W	YGR016W ... YGR016W biological process unknown molecular function unknown cellular component unknown | YGR017W	-0.161644	0.170005	1.1393	0.775628	0.810227	0.513485	0	0.736054	-0.263754	0.865739	0.798272	0.55494	0.431527	0	0.429147	-0.446952	0.722933	0.580481	0.389788	-0.223605
YOL119C	YOL119C ... MCH4 transport transporter activity* vacuolar membrane (sensu Fungi) | YOL120C	-0.0374574	0.404023	1.07667	0.734488	0.422374	0.556132	0	0.0572311	0.645867	0.958034	0.193918	0.38166	0.398239	0	-0.903031	-0.405184	0.176455	0.657218	-0.904251	-0.737651
YMR271C	YMR271C iESR cluster URA10 pyrimidine base biosynthesis orotate phosphoribosyltransferase acytoplasm | YMR272C	1.19529	1.36383	3.9874	3.18165	4.67817	4.56067	0	0.736054	1.15022	3.77212	2.21177	3.45231	2.85539	0	0.522256	0.795687	0.875011	1.29257	0.869994	0.846297
YMR185W	YMR185W ... YMR185W biological process unknown molecular function unknown cellular component unknown | YMR186W	0.939838	1.17075	0.835618	0.708787	0.393976	1.33248	0	0.761933	0.711998	1.7127	0.663032	0.431211	1.12332	0	-0.20779	-0.139671	0.304797	0.88494	-0.493258	0.678717
YEL020C	YEL020C ... YEL020C biological process unknown molecular function unknown cytoplasm | YEL020W-A	0.609148	1.02245	1.30774	0.654303	1.19987	1.17893	0	0.42956	0.814856	1.45165	0.46595	0.768216	0.751908	0	-0.203983	0.0845713	0.289168	0.378467	-0.14168	0.408923
YJL149W	YJL149W ... YJL149W biological process unknown molecular function unknown SCF ubiquitin ligase complex | YJL150W	0.28561	0.384639	1.31625	0.4923	0.828309	1.31344	0	-0.0917289	0.347555	1.7957	0.154899	0.340907	0.556091	0	-0.0693625	0.232015	-0.0575346	0.0805829	-0.488602	0.256876
YGL194C-A	YGL194C-A YGL194C-A YKL023C-A	0.354361	0.895193	1.60228	1.93654	0.622399	0.893215	0	0.240343	1.16529	1.60125	2.08865	0.726309	1.14491	0	0.181491	0.500936	0.484266	0.644913	0.881508	0.782565
YIL012W	YIL012W | YIL013C	1.13887	1.78144	2.33924	1.4095	0.848059	1.45546	0	1.08155	2.64314	2.53506	0.589686	0.726309	0.511697	0	0.633287	0.58547	1.33093	0.165443	-0.768549	-0.658008
YGR112W	YGR112W ... SHY1 aerobic respiration unfolded protein binding integral to membrane* | YGR113W	0.564434	0.918844	0.81482	1.15119	1.61034	1.82789	0	0.275865	0.603979	0.97301	0.938172	1.19766	1.39949	0	0.395788	0.829837	0.174808	0.500051	0.187363	0.6221
YDL239C	YDL239C ... ADY3 protein complex assembly* protein binding spindle* | YDL240C-A	0.649097	0.660532	0.971143	0.640415	0.761108	1.95538	0	0.645065	0.356542	0.778505	0.600724	0.284799	1.03933	0	-0.10227	0.385425	0.600355	0.780268	-0.33559	0.610481
YHR030C	YHR030C ... SLT2 cell wall organization and bio MAP kinase activity cytoplasm* | YHR031C	0.673354	1.05504	1.49032	1.05836	1.34622	1.45901	0	0.6067	0.80336	1.591	0.422788	0.690053	0.983316	0	0.148971	0.642137	-0.145061	0.262801	-0.270392	0.184126
YDR031W	YDR031W … MIC14 biological process unknown molecular function unknown | Mitochondrial intermembrane space cysteine motif protein of 14 kDaYDR032C	0.997393	2.28137	0.910398	1.42064	3.5826	2.97669	0	1.09862	2.50178	1.1735	0.728206	2.57431	2.4857	0	1.19225	2.68856	0.777328	0.550492	2.76395	1.24888
YMR096W	YMR096W ... SNZ1 pyridoxine metabolism* protein binding cellular component unknown | YMR097C	0.477954	0.68155	1.68309	0.637079	0.290923	0.274886	0	1.19703	0.441285	2.43723	0.49361	0.271743	0.568164	0	-0.0447845	0.179477	-0.177982	-0.00985386	-0.575417	-0.33608
YEL060C	YEL060C iESR cluster PRB1 sporulation* serine-type endopeptidase activity vacuole (sensu Fungi)* | YEL061C	1.06523	0.791764	1.31662	0.150498	0.465528	1.0573	0	0.456327	0.597928	2.15199	0.0131127	0.406128	0.685505	0	0.113069	0.186147	0.424246	0.506403	-0.895966	-0.293759
YBL098W	YBL098W ... BNA4 NAD biosynthesis kynurenine 3-monooxygenase activitymitochondrion | YBL099W	1.59808	1.79185	1.89506	1.83808	1.00452	2.32775	0	1.27515	1.01831	1.53091	1.23873	0.522775	1.07518	0	0.667413	0.511245	0.367453	0.618707	-0.277709	0.566752
YBL099W	YBL099W ... ATP1 ATP synthesis coupled proton t hydrogen-transporting ATP synthase mitochondrial nucleoid* | YBL100C	0.422143	0.931418	1.28388	0.475216	0.834246	1.30063	0	0.0491801	0.735731	1.08329	0.335843	0.668374	1.10281	0	0.334071	0.481701	0.595954	0.519376	0.135548	0.714469
YPL270W	YPL270W ... MDL2 aerobic respiration "ATPase activity, coupled to transme"mitochondrial inner membrane | YPL271W	0.462826	0.422624	0.830822	0.625608	0.504201	1.17845	0	0.520989	0.630577	0.782471	0.637652	0.384278	0.986193	0	0.682748	0.450434	0.243573	0.54106	-0.0858269	0.583395
YPL214C	YPL214C ... THI6 thiamin biosynthesis hydroxyethylthiazole kinase activitcytoplasm | YPL215W	0.17763	0.864326	1.06794	0.682923	1.08672	1.16945	0	0.235792	0.421304	1.25515	0.624451	0.698218	0.807061	0	0.235323	0.415545	0.134199	0.568931	0.286976	0.625164
YMR261C	YMR261C ... TPS3 response to stress* "alpha,alpha-trehalose-phosphate syn""alpha,alpha-trehalose-phosphate syn" | YMR262W	0.495148	0.778012	0.923615	0.274302	0.737783	1.26449	0	0.251074	0.403487	0.932885	0.217505	0.658806	0.704135	0	0.462811	0.633338	0.377055	0.713443	-0.466845	0.23707
YDL234C	YDL234C ... GYP7 vesicle-mediated transport Rab GTPase activator activity cytoplasm | YDL235C	0.910438	0.843124	1.51017	0.875918	1.27938	1.64242	0	0.632021	0.559042	1.88982	0.69521	0.898299	0.898263	0	0.31031	0.699505	0.0851703	0.540828	-0.649591	0.166101
YER185W	YER185W … PUG1 biological process unknown molecular function unknown | Plasma membrane protein with roles in the uptake of protoprophyrin IX and the efflux of heme; expression is induced under both low-heme and low-oxygen conditions; member of the fungal lipid-translocating exporter (LTE) family of proteinsYER186C	1.05581	1.67564	2.22677	1.19019	2.79559	2.54606	0	0.446548	1.58424	3.65006	1.0322	2.53954	1.57059	0	0.743711	0.737473	0.344733	0.444044	1.44202	0.886313
YMR145C	YMR145C ... NDE1 ethanol fermentation* NADH dehydrogenase activity mitochondrion | YMR146C	0.525888	1.97408	1.14284	0.858485	1.56795	2.05812	0	1.14044	2.27939	2.44646	1.6785	2.10482	2.2279	0	-0.251235	0.363077	0.300338	0.564539	1.30184	1.21646
YML100W	YML100W iESR cluster TSL1 response to stress* enzyme regulator activity "alpha,alpha-trehalose-phosphate syn" | YML100W-A	2.06535	2.39223	2.71702	1.23119	3.74367	3.71521	0	0.28901	0.872133	2.84139	0.669912	3.29572	2.09125	0	1.41014	1.93694	1.40837	1.36325	0.911455	0.963299
YMR090W	YMR090W iESR cluster YMR090W biological process unknown molecular function unknown cytoplasm | YMR091C	1.4109	1.88591	3.04215	2.29415	3.35583	2.7253	0	0.810104	0.983513	2.52721	1.38179	1.80257	1.31717	0	2.06423	2.6088	2.44308	2.58758	1.80815	1.39473
YGR088W	YGR088W iESR cluster CTT1 response to stress catalase activity cytoplasm | YGR089W	0.817687	1.16589	2.00827	0.524977	1.82481	1.91271	0	0.696526	0.758272	2.06078	0.503956	1.38464	1.33821	0	-0.00631033	0.329815	1.08992	1.04069	0.36324	0.127868
YOL100W	YOL100W ... PKH2 protein amino acid phosphoryla protein kinase activity nucleus | YOL101C	1.07687	1.26374	0.953588	0.701155	0.166543	1.58728	0	0.587543	0.109198	0.674849	0.399189	0.0753954	0.653358	0	0.577514	0.811293	0.123527	0.473578	-0.878048	0.532549
YHR157W	YHR157W ... REC104 meiotic recombination* molecular function unknown nucleus | YHR158C	0.760354	-0.056504	1.96485	1.71206	0.760596	0.65053	0	-0.47099	0.106196	2.19165	1.54078	1.06735	0.814766	0	-0.182288	0.38753	0.952415	0.924435	0.609962	1.07896
YJR121W	YJR121W ... ATP2 ATP synthesis coupled proton t hydrogen-transporting ATP synthase soluble fraction* | YJR122W	0.343066	0.879644	1.15165	0.701628	1.19202	1.3432	0	0.206928	0.703392	0.954011	0.318736	0.648499	0.90998	0	0.371337	0.654481	0.386842	0.38849	0.259709	0.470399
YHR018C	YHR018C ... ARG4 arginine biosynthesis argininosuccinate lyase activity cytosol | YHR019C	0.453692	1.26733	1.69226	2.31512	1.74796	1.60575	0	0.479865	1.01115	1.56047	2.13541	1.78909	1.87107	0	-0.364157	0.577499	-0.620391	-0.159933	-1.20858	-1.1132
YKR064W	YKR064W … OAF3 biological process unknown molecular function unknown | Zinc cluster protein; regulates transcription in response to oleate levels; the authentic, non-tagged protein is detected in highly purified mitochondria in high-throughput studiesYKR065C	0.0571283	0.271676	0.504012	0.750858	0.532162	1.15875	0	0.38856	-0.0510512	0.60167	0.631855	0.639894	0.939345	0	0.211555	0.327373	-0.0655068	0.43567	-0.163595	0.362505
YOR220W	YOR220W … iESR cluster RCN2 biological process unknown molecular function unknown | Protein of unknown function; green fluorescent protein (GFP)-fusion protein localizes to the cytoplasm and is induced in response to the DNA-damaging agent MMS; phosphorylated in response to alpha factorYOR221C	0.586848	0.931757	1.21186	0.685672	1.67823	1.61384	0	-0.0156513	0.564997	1.34378	0.480929	1.01331	0.965537	0	0.0841482	0.740117	0.151396	0.337672	-0.306146	0.238615
YOL086W-A	YOL086W-A ... YOL086W-A biological process unknown molecular function unknown cellular component unknown | YOL087C	-0.220281	-0.122777	0.731009	0.313575	1.07837	0.767087	0	0.377247	0.338767	1.31515	0.623044	0.638586	0.864681	0	0.0676902	0.41922	0.546964	1.14387	0.245909	0.575263
YMR105C	YMR105C iESR cluster PGM2 glucose 1-phosphate utilizatio phosphoglucomutase activity cytosol | YMR105W-A	2.15869	3.25352	3.1742	1.89901	4.5592	3.94655	0	0.283972	1.11944	2.94611	1.84439	3.19551	2.1907	0	3.04232	3.85919	2.52385	2.59821	1.26872	0.98338
YOR059C	YOR059C ... YOR059C biological process unknown molecular function unknown lipid particle | YOR060C	0.636421	0.816515	1.01121	0.840092	0.80499	1.25649	0	0.505359	0.418298	1.03804	0.681817	0.489868	0.922247	0	0.721785	0.853808	0.11352	0.317447	-0.0248892	0.870093
YGR209C	YGR209C iESR cluster TRX2 response to oxidative stress* thiol-disulfide exchange intermediacytosol* | YGR210C	0.505701	0.758992	1.47453	0.916336	1.55331	2.15644	0	0.321071	0.374038	1.49036	0.506853	1.11872	1.5195	0	0.939599	0.618252	0.736097	0.891553	0.478344	0.987343
YNR057C	YNR057C ... BIO4 biotin biosynthesis dethiobiotin synthase activity cytoplasm | YNR058W	-0.108402	-0.0930299	1.7722	0.502609	2.39867	2.38507	0	1.28418	0.736246	4.00463	0.955814	2.62161	1.50432	0	-0.97767	-0.41453	-0.24023	0.834238	0.757519	0.66392
YDR059C	YDR059C iESR cluster UBC5 endocytosis* ubiquitin conjugating enzyme activiproteasome complex (sensu Eukaryota | YDR060W	0.921346	0.84496	1.74832	1.16526	2.25245	2.0225	0	0.838416	0.763991	2.02845	0.919476	1.54877	1.39348	0	0.807658	0.626889	0.210483	0.833474	0.689501	0.853077
YJL070C	YJL070C ... YJL070C biological process unknown molecular function unknown cytoplasm* | YJL071W	0.149126	0.549241	0.594371	0.313531	1.03744	0.850596	0	0.388529	0.538257	0.790734	0.294879	0.726309	0.436359	0	0.463827	1.16097	0.0747891	0.5296	-0.329438	-0.308673
YPR172W	YPR172W ... YPR172W biological process unknown molecular function unknown cytoplasm* | YPR173C	0.321133	0.415635	0.829686	0.956948	0.776461	0.966068	0	0.497535	0.385002	0.852531	0.602305	0.365006	0.559425	0	0.324083	0.0679981	0.207117	0.439618	-0.0932546	0.380902
YPR015C	YPR015C ... YPR015C biological process unknown molecular function unknown cellular component unknown | YPR016C	1.00699	0.56663	1.50274	0.730415	0.823606	1.13056	0	1.00196	0.625466	1.85367	0.95843	1.26945	1.45328	0	-0.146068	-0.795134	0.0899186	-0.124712	0.108594	0.0133696
YMR174C	YMR174C iESR cluster PAI3 vacuolar protein catabolism endopeptidase inhibitor activity cytoplasm | YMR175W	1.22748	1.1845	2.35475	1.66584	3.69606	3.12684	0	0.818516	1.0317	2.6783	0.905188	2.5003	2.18547	0	0.391315	-0.210997	0.932786	1.19292	0.216951	0.078958
YLR149C	YLR149C iESR cluster YLR149C biological process unknown molecular function unknown cellular component unknown | YLR149C-A	1.53255	1.86583	2.31371	1.31651	3.561	2.96899	0	1.07749	1.26087	2.51926	1.13138	2.54943	1.84756	0	1.2739	2.17621	1.53456	1.5811	0.348634	0.212636
YGR254W	YGR254W ... ENO1 glycolysis* phosphopyruvate hydratase activity cytoplasm* | YGR255C	1.88977	2.15658	2.5055	1.69995	2.37572	1.6987	0	1.94071	2.67898	2.34666	2.08584	2.42697	2.10966	0	1.84408	1.93547	1.76964	1.81199	1.94556	1.50446
YLR007W	YLR007W ... NSE1 DNA repair* molecular function unknown nucleus* | YLR008C	0.164076	0.846849	1.1763	0.7918	0.105355	0.939357	0	0.288836	0.361851	1.48243	0.626212	-0.219834	0.495114	0	0.52	0.963226	0.111405	0.276317	-0.0213532	0.720504
YGL219C	YGL219C ... MDM34 mitochondrion organization and molecular function unknown cytoplasm* | YGL220W	0.649827	1.03553	0.783499	0.681879	1.0352	1.43839	0	0.460062	0.62838	0.816341	0.554268	0.829053	1.18169	0	0.131538	0.444327	0.116177	0.180719	-0.209398	0.363483
YBR026C	YBR026C iESR cluster ETR1 aerobic respiration* enoyl-[acyl-carrier protein] reductmitochondrion | YBR027C	0.835316	0.754448	1.17164	0.919694	1.41646	1.50901	0	0.543894	0.512452	1.13933	0.335369	0.775003	0.975916	0	0.507757	0.483932	0.283621	0.510722	0.213031	0.581682
YIL071C	YIL071C ... PCI8 protein deneddylation molecular function unknown signalosome complex | YIL071W-A	0.113369	0.635166	0.819713	0.915532	1.36451	1.50885	0	0.603248	0.414318	0.958034	0.559312	0.88136	0.861211	0	0.466929	0.870996	0.281252	0.636598	0.0932532	0.579163
YMR192W	YMR192W ... GYL1 ER to Golgi transport* protein binding cytoplasm* | YMR193C-A	0.332804	0.767977	0.706694	0.67167	0.725421	1.39267	0	0.36305	0.285942	0.71202	0.193803	0.418777	1.02188	0	0.17333	0.613484	-0.315518	0.18896	-0.681135	0.0701699
YBR006W	YBR006W iESR cluster UGA2 response to oxidative stress* succinate-semialdehyde dehydrogenascytoplasm | YBR007C	0.707886	1.06356	1.43339	1.22271	1.87691	1.71297	0	0.23823	0.854407	1.35138	1.02273	1.50454	1.30669	0	0.325054	0.817022	0.456138	1.02529	0.344544	0.265534
YPR030W	YPR030W ... CSR2 cell wall organization and bio molecular function unknown nucleus | YPR031W	0.599291	0.705336	1.61576	0.467215	0.57504	1.29626	0	0.35527	0.176158	2.84078	0.675416	0.886249	0.867072	0	0.127396	0.63345	0.962539	1.73446	-0.0780938	0.597831
YER037W	YER037W iESR cluster PHM8 biological process unknown molecular function unknown cytoplasm* | YER038C	1.81121	2.44539	2.48769	2.2773	2.87772	3.71664	0	0.390058	1.24029	3.48975	1.49611	1.84732	2.04654	0	-0.120192	0.893592	1.15127	1.75656	0.855551	1.81047
YNL115C	YNL115C iESR cluster YNL115C biological process unknown molecular function unknown vacuole (sensu Fungi) | YNL116W	0.318043	0.731486	1.64207	0.984912	1.98974	1.36985	0	0.150138	0.601403	1.81876	0.579368	1.15658	0.530655	0	0.0108635	0.485934	0.167875	0.65797	-0.295844	-0.458699
YML042W	YML042W iESR cluster CAT2 carnitine metabolism carnitine O-acetyltransferase activmitochondrion* | YML043C	1.37703	1.87546	2.66348	1.25569	2.52977	3.20447	0	0.731805	1.27782	2.43197	1.27046	2.04738	2.00571	0	-0.78175	-0.262527	1.52773	1.38801	0.521153	1.03754
YJR154W	YJR154W ... YJR154W biological process unknown molecular function unknown cytoplasm | YJR155W	0.508815	1.01715	1.52633	0.452568	1.94612	2.65993	0	1.1054	0.361851	3.48839	1.35265	2.02037	1.73899	0	-1.36671	-0.39181	0.4219	0.497425	-0.0517971	0.767014
YJL099W	YJL099W ... CHS6 Golgi to plasma membrane trans molecular function unknown clathrin-coated vesicle | YJL100W	0.232177	0.616455	0.898669	0.798457	0.654887	1.1399	0	-0.170991	-0.0374781	0.838541	0.304871	0.282474	0.461551	0	0.364978	0.113889	-0.247149	0.143222	-0.27419	0.336756
YGR053C	YGR053C ... YGR053C biological process unknown molecular function unknown cellular component unknown | YGR054W	1.61833	1.47955	1.08144	1.79652	2.17153	4.32018	0	1.06644	0.758272	1.39756	1.73055	1.4368	3.14175	0	1.27714	0.943924	1.07795	1.7012	0.204978	2.40089
YGL059W	YGL059W … iESR cluster PKP2 biological process unknown protein kinase activity | Mitochondrial protein kinase that negatively regulates activity of the pyruvate dehydrogenase complex by phosphorylating the ser-133 residue of the Pda1p subunit; acts in concert with kinase Pkp1p and phosphatases Ptc5p and Ptc6pYGL060W	1.11612	0.873418	0.995509	1.19599	0.989855	1.68546	0	1.19326	0.882766	1.43197	1.30357	1.18474	1.6637	0	0.657535	1.01289	0.0364794	0.698395	-0.544585	0.218888
YPR191W	YPR191W ... QCR2 aerobic respiration* ubiquinol-cytochrome-c reductase acmitochondrion* | YPR192W	0.73787	1.24058	1.99459	1.354	2.12098	1.91482	0	0.644868	1.31415	1.7034	0.466627	1.84893	1.01635	0	0.309499	1.22792	1.26918	1.41656	0.429032	0.298524
YER141W	YER141W iESR cluster COX15 cytochrome c oxidase complex a "oxidoreductase activity, acting on"mitochondrial inner membrane | YER142C	0.938691	1.03014	1.79453	1.00257	2.42237	1.70057	0	0.309675	1.01081	1.68182	0.5651	1.60405	0.801204	0	-0.380175	-0.120123	1.46271	1.50516	0.92075	0.110667
YDL021W	YDL021W iESR cluster GPM2 biological process unknown molecular function unknown* cytoplasm* | YDL022W	1.52326	1.81573	1.78403	2.00688	4.02887	4.94689	0	1.07515	1.11426	1.71172	1.96202	3.61422	4.02373	0	1.67031	2.13034	1.23576	1.82549	1.93299	2.72363
YDR035W	YDR035W ... ARO3 aromatic amino acid family bio 3-deoxy-7-phosphoheptulonate synthacytoplasm* | YDR036C	0.121938	0.310466	1.00208	1.26741	1.16936	1.1128	0	0.379632	0.591886	0.783202	1.10394	1.18811	1.43681	0	-0.120653	-0.0432585	-0.197259	-0.0496272	-0.124037	-0.144585
YLR273C	YLR273C ... PIG1 regulation of glycogen biosynt protein phosphatase regulator activprotein phosphatase type 1 complex | YLR274W	0.726801	0.764012	1.23144	0.909929	0.476582	1.85399	0	0.318087	0.225556	1.39954	0.20176	0.282539	0.818945	0	0.578361	0.0799415	0.491781	0.383576	-0.333334	0.99114
YEL030W	YEL030W ... ECM10 protein-mitochondrial targetin molecular function unknown mitochondrion* | YEL031W	0.298774	0.530594	0.545692	0.793286	-0.00807844	1.52673	0	0.674127	0.39007	1.10592	0.886667	0.0706431	0.7866	0	0.0864601	0.366635	-0.0201042	0.924435	-0.247717	0.856566
YJL045W	YJL045W ... YJL045W cellular respiration succinate dehydrogenase (ubiquinonemitochondrion | YJL046W	0.859889	2.56994	1.45027	1.57942	3.54523	4.27989	0	2.22061	3.45871	2.847	1.81208	2.89623	2.83363	0	-0.530211	1.45994	0.21545	1.24636	0.249372	0.66392
YDR178W	YDR178W ... SDH4 tricarboxylic acid cycle* succinate dehydrogenase (ubiquinonerespiratory chain complex II (sensu | YDR179C	1.06424	0.622275	1.71966	0.492413	1.57124	1.6584	0	0.950824	1.10559	1.71349	0.448927	1.07219	0.982714	0	0.616893	0.305362	0.60989	0.600659	-0.133756	0.338412
YLR290C	YLR290C iESR cluster YLR290C biological process unknown molecular function unknown mitochondrion | YLR291C	0.424751	0.884369	0.558221	1.14373	1.78992	1.61244	0	0.185114	0.30769	0.583968	0.833375	1.2796	1.54234	0	0.293384	0.688821	0.245861	0.517512	0.396421	0.631159
Cluster_8	#N/A	0	0	0	0	0	0	0	0	0	0	0	0	0	0	0	0	0	0	0	0
YKL086W	YKL086W ... SRX1 response to oxidative stress "oxidoreductase activity, acting on"cytoplasm* | YKL087C	0.760354	2.32201	2.82467	1.82454	-1.06948	-2.11116	0	0.818516	1.58424	3.39132	2.58969	1.57431	-1.10739	0	1.7205	2.00051	0.537378	-0.213068	1.07945	0
YLL017W	YLL017W	2.08228	-0.677992	-1.20508	0.824537	-0.069479	1.24489	0	1.81852	0.321209	0.513579	2.52829	1.08888	1.5002	0	0.955216	-0.192138	0.730023	2.54182	0.594021	1.55289
YDL242W	YDL242W ... | YDL243C	1.56771	0.322008	2.0877	2.198	-1.06948	3.19242	0	1.81852	0.584243	2.32093	1.30018	-0.59562	2.61123	0	1.27714	0.000507	0.878415	1.08239	-0.920553	1.66392
YFL021C-A	YFL021C-A … Dubious Dubious open reading frame unlikely to encode a functional protein, based on available experimental and comparative sequence dataYFL031C-A	1.13887	1.32201	3.01731	1.82454	0.252449	0.537072	0	1.30394	-0.00072	3.80636	3.17465	0.989343	0.540843	0	0.21825	0.737473	2.27434	2.59429	-0.33559	0.078958
YER084W	YER084W ... | YER085C	0.760354	2.90697	1.73782	0.561408	-1.06948	-0.392539	0	1.81852	2.32121	2.09803	-1.06576	1.57431	0.611233	0	1.95522	1.58547	0.672926	-1.28355	-0.33559	-0.921042
YGR259C	YGR259C ... | YGR260W	1.93028	1.86302	2.10478	1.73553	1.06802	2.0225	0	1.62587	1.27726	1.32093	0.745794	0.252377	-0.97373	0	-2.04478	-0.0434446	-0.0475849	-0.887035	-0.242481	0.400886
YDR278C	YDR278C ... | YDR279W	-1.23965	-1.26295	2.9242	2.22664	-1.77478	1.86158	0	0.448421	-2.58568	3.45844	1.58969	-1.71596	1.86158	0	-0.0447845	-1.58446	1.53738	1.68002	1.1815	1.66392
YPR007C	YPR007C ... REC8 meiosis* binding "condensed nuclear chromosome, peric" | YPR008W	2.21979	4.56994	0.577272	0.846631	2.38995	2.68546	0	2.06644	3.58424	0.244583	0.459289	3.38166	2.61123	0	-1.04478	2.80786	-0.0776421	0.126562	2.07945	1.81592
YOL109W	YOL109W ... ZEO1 cell wall organization and bio molecular function unknown mitochondrion* | YOL110W	0.0427535	-0.385812	4.5821	2.34327	0.816864	2.88499	0	-0.931505	-0.91499	5.95579	1.43357	1.11487	1.52103	0	1.4462	1.16716	3.04928	2.08649	2.03505	4.34063
YBR299W	YBR299W ... MAL32 maltose catabolism alpha-glucosidase activity cellular component unknown | YBR300C	0.830743	2.64394	1.86531	0.476614	1.10886	2.5727	0	1.88891	2.96275	0.484432	1.72093	1.91134	2.21892	0	0.440642	2.13801	1.95242	1.3015	0.153448	1.2258
YDL181W	YDL181W ... INH1 ATP synthesis coupled proton t enzyme inhibitor activity proton-transporting ATP synthase co | YDL182W	2.56771	2.32201	3.18724	0.95382	1.73788	1.04754	0	1.40348	2.16921	2.27911	-0.187922	0.574305	-1.53365	0	3.54018	2.00051	1.78892	1.27878	1.07945	0.519036
YGR144W	YGR144W ... THI4 mitochondrial genome maintenan molecular function unknown mitochondrion* | YGR145W	1.96199	0.643936	4.25435	2.23957	1.77852	2.77739	0	1.74452	1.69972	5.25235	1.87919	0.83734	2.02627	0	0.955216	0.907398	1.89995	3.90241	1.34248	1.98585
YMR118C	YMR118C ... YMR118C biological process unknown molecular function unknown cellular component unknown | YMR119W	-2.5822	1.32201	3.71196	2.81565	0.345559	0.244891	0	-2.52404	0.99928	4.10869	1.64534	-0.373227	0.0262703	0	-0.802374	4.00051	-0.674864	0.105623	-1.09048	0.66392
YGR234W	YGR234W ... YHB1 response to stress nitric oxide reductase activity cytoplasm* | YGR235C	-0.852858	0.261381	2.76315	3.22512	1.03273	1.0321	0	0.717124	1.78269	3.41434	3.23022	0.927845	0.773217	0	-3.10323	-1.62052	0.473531	1.88024	0.0637536	-0.154714
YBR126W-B	YBR126W-B … Dubious Identified by SAGEYBR131C-A	-0.611615	-0.0499611	1.3984	1.621	2.04015	0.277756	0	-1.18148	-0.460151	0.999006	1.00472	0.496303	0.429626	0	0.250671	0.711	0.774078	1.34636	1.41648	-0.351676
YHR092C	YHR092C ... HXT4 hexose transport glucose transporter activity* plasma membrane | YHR093W	0.771669	1.18799	2.10924	1.63898	0.515484	0.404369	0	1.53719	2.36476	1.61733	1.54477	2.13909	0.0262703	0	0.999954	0.840727	2.99911	3.23273	2.84763	1.76248
YBR124W	YBR124W ... | YBR125C	1.34532	2.1558	3.04379	1.55883	0.368181	0.566913	0	0.818516	0.248111	3.20237	0.360504	-0.894925	0	0	-1.62975	-0.1657	0.777263	-1.17922	0	-1.96159
YNL276C	YNL276C ... | YNL277W	2.87583	5.02245	0.92985	0.824537	-0.069479	1.24489	0	2.04091	4.32121	-0.181567	0.236049	-0.496084	1.90074	0	1.54018	2.58547	0.25727	0.350833	0.594021	0.815924
YIL170W	YIL170W	0.760354	3.68348	-2.20508	-0.438497	-0.069479	0.0224985	0	-0.181484	3.68348	-0.486421	0.227116	0.989343	3.97286	0	-0.0447845	1.00051	0.604492	2.62823	0.0794474	3.97286
YHR184W	YHR184W ... SSP1 protein complex assembly* molecular function unknown prospore membrane | YHR185C	1.34532	0.781439	1.33924	0.631892	0.415948	2.34443	0	3.27795	1.58424	2.69945	1.91161	1.47477	3.72671	0	2.86211	1.08797	2.47598	2.07233	1.00545	4.07896
YJR156C	YJR156C ... THI11 thiamin biosynthesis protein binding cellular component unknown | YJR157W	0.982746	3.78144	3.33924	3.28397	2.25245	0.0224985	0	0.233554	2.99928	3.99901	3.70516	3.31127	1.14175	0	1.54917	0.000507	2.75977	3.24636	1.07945	-0.506005
YBR250W	YBR250W … SPO23 biological process unknown molecular function unknown | Protein of unknown function; associates with meiosis-specific protein Spo1pYBR251W	-0.539207	0.322008	-0.13469	2.19377	-0.769919	2.41482	0	0.772713	1.11476	1.32093	2.81208	0.873866	2.88425	0	-0.874859	0.290014	0.330927	2.10886	0.0794474	2.47128
YDR374C	YDR374C ... YDR374C biological process unknown molecular function unknown cellular component unknown | YDR375C	-1.63728	0.322008	2.71775	1.4095	1.51548	2.0225	0	-2.16408	0.99928	3.85699	2.00472	0.989343	2.02627	0	-2.02738	2.10637	-1.04758	1.37189	3.23947	1.66392
YIL164C	YIL164C ... NIT1 biological process unknown nitrilase activity cellular component unknown | YIL165C	1.18485	1.0159	3.03291	3.75219	1.72699	1.9485	0	1.24301	1.2156	2.71385	3.969	2.0082	2.3482	0	1.35114	0.979133	1.15677	1.81796	0.223837	1.07896
YDL248W	YDL248W ... COS7 biological process unknown receptor activity mitochondrion | YDR001C	-0.0528778	0.451291	1.90561	1.15668	1.51548	-1.37419	0	0.505359	1.05456	1.7206	1.10719	0.574305	-3.69235	0	0.0895166	-0.0569784	0.614877	0.933064	2.56234	-3.63966
YIL165C	YIL165C ... YIL165C biological process unknown molecular function unknown cellular component unknown | YIL166C	0.723828	0.836581	2.98079	3.55836	2.32284	2.41482	0	1.08155	1.02482	2.48443	3.81655	2.44877	2.07066	0	0.540178	1.0758	0.21545	1.21757	0.886802	1.12335
YJR079W	YJR079W ... YJR079W biological process unknown molecular function unknown cellular component unknown | YJR080C	0.843456	0.696369	1.47674	2.82454	-0.243254	2.60746	0	0.901619	1.37364	2.99901	4.09219	0	3.02627	0	1.03832	-0.625132	2.12234	3.17925	-1.67929	2.88631
YCL021W-A	YCL021W-A ... YCL021W-A biological process unknown molecular function unknown cellular component unknown | YCL022C	0.138865	1.75497	0.934851	2.08757	-0.069479	0.607461	0	0.496588	0.677352	1.63644	3.2975	1.40438	0.833625	0	0.540178	-0.151496	-0.410155	2.04997	0.494485	0.248883
YHR015W	YHR015W ... MIP6 mRNA-nucleus export RNA binding nuclear pore | YHR016C	-0.239646	0.90697	0.695385	1.08757	-1.52891	0.344427	0	2.32102	2.58424	2.53506	2.38323	1.05347	2.83363	0	0.955216	2.32244	0.630487	2.27236	0.320456	2.40089
YGL187C	YGL187C ... COX4 aerobic respiration* cytochrome-c oxidase activity respiratory chain complex IV (sensu | YGL188C	0.460793	-0.900385	2.04285	1.29847	0.708129	0.285533	0	-0.596521	0.361851	1.74624	0.29423	0.503916	-0.125733	0	1.27714	1.00051	1.97795	1.70447	1.07945	-1.24297
YBL065W	YBL065W ... | YBL066C	1.34532	0.90697	3.10478	2.37922	3.25245	1.04335	0	1.14044	-0.310231	2.69945	1.09998	1.82287	-0.367914	0	-0.0447845	0.322435	1.27434	-2.11782	1.82287	-0.900189
YOR105W	YOR105W ... | YOR106W	-1.23965	0.322008	-0.341061	0.824537	0.930521	1.60746	0	-0.511315	2.32121	1.64063	3.46415	-0.59562	0.0262703	0	-1.04478	0.000507	0.594041	2.59429	-0.505515	0.901841
YIL014C-A	YIL014C-A ... YIL014C-A biological process unknown molecular function unknown cellular component unknown | YIL014W	0.168438	0.924248	2.43546	2.98748	2.60512	2.17545	0	0.633777	1.35216	3.15783	3.58969	2.13021	2.66709	0	0.655655	1.32591	2.58629	3.08992	2.37901	2.17976
YPL044C	YPL044C PAC cluster | YPL045W	-0.153918	2.90697	3.47674	3.82454	0	-1.62686	0	-2.41768	0.99928	3.45844	3.17465	0	0	0	-2.28098	0.000507	-0.0475849	-0.213068	-2.41363	0
YCR102W-A	YCR102W-A ... | YCR104W	1.03044	2.50133	0.0173133	-0.111332	0.677755	0.645935	0	1.92088	3.14064	1.58397	0.715217	0.796698	0.986742	0	-1.22536	0.305362	0.0899186	0.536954	0.0794474	0.154907
YJL037W	YJL037W … IRC18 biological process unknown molecular function unknown | Putative protein of unknown function; expression induced in respiratory-deficient cells and in carbon-limited chemostat cultures; similar to adjacent ORF, YJL038C; null mutant displays increased levels of spontaneous Rad52p fociYJL038C	-1.82461	1.49193	-0.801695	0.824537	1.31956	1.19242	0	0.349031	1.99928	1.91696	2.32665	1.15161	1.64098	0	0.370253	2.08797	-2.45156	1.78693	0.330986	0.60252
YGL249W	YGL249W ... ZIP2 synaptonemal complex formation molecular function unknown synaptonemal complex | YGL250W	0.175391	0.585042	1.11685	2.73143	-1.06948	1.48193	0	-0.351409	0.99928	1.36158	3.13401	1.44877	0.833625	0	-0.892781	1.26354	-0.0475849	3.40164	1.24937	2.07896
YNL117W	YNL117W ... MLS1 glyoxylate cycle malate synthase activity cytoplasm* | YNL118C	0.930279	0.032501	3.01731	1.60214	1.97492	2.50055	0	1.40348	0.446739	4.45844	1.78233	1.68978	1.80388	0	0.955216	0.34843	3.59627	1.78693	1.53888	1.59353
YNL093W	YNL093W ... YPT53 endocytosis* GTPase activity late endosome | YNL094W	1.98275	1.32201	3.47674	0.824537	0.335166	3.72294	0	2.40348	2.80664	4.08647	1.14223	0.0314175	1.61123	0	1.17761	1.41554	2.75977	1.98857	-0.10087	2.66392
YGL188C	YGL188C ... | YGL188C-A	-0.239646	0.322008	4.15411	0.309964	1.93052	2.34443	0	-2.50341	-1.00072	3.87276	-0.50985	1.98934	-0.97373	0	0.803212	1.45994	3.89656	1.37189	2.8868	1.66392
YDL186W	YDL186W ... YDL186W biological process unknown molecular function unknown cellular component unknown | YDL187C	-0.239646	-0.641213	1.82467	1.67253	-0.069479	1.60746	0	0.233554	-1.37898	2.80636	2.14223	-0.010657	1.02627	0	0.370253	-0.962713	1.53738	0.272359	1.07945	3.07896
YKL053W	YKL053W ... | YKL054C	2.34532	1.32201	4.33924	1.38446	2.38995	1.0225	0	1.40348	0.584243	4.24693	0.30161	0.989343	1.61123	0	0.955216	0.000507	2.75977	-0.23811	1.07945	0.078958
YOL157C	YOL157C ... YOL157C biological process unknown molecular function unknown cellular component unknown | YOL158C	0.41243	0.0589732	-0.245721	1.36511	0.466574	1.3581	0	0.181087	1.50178	0.352643	1.93761	0.915342	1.30638	0	1.90275	2.32244	1.64047	2.91246	0.281081	0.146072
YBL100W-C	YBL100W-C ... YBL100W-C biological process unknown molecular function unknown cellular component unknown | YBL101C	1.08228	0.322008	2.60228	1.912	1.25245	0.566913	0	1.98844	1.58424	1.99901	0.812078	-1.01066	1.15565	0	-0.957572	0.000507	0.537378	-2.21307	0.66441	0.623373
YDR402C	YDR402C ... DIT2 spore wall assembly (sensu Fun oxidoreductase activity cellular component unknown | YDR403W	-0.654684	2.90697	1.01731	0.824537	-2.39853	0.0224985	0	1.27795	3.16921	3.32093	3.32665	-1.11732	2.61123	0	-0.0447845	2.00051	-0.0475849	3.24636	-2.83457	4.07029
YIL117C	YIL117C ... PRM5 conjugation with cellular fusi molecular function unknown integral to membrane | YIL118W	4.32514	4.53702	2.47674	2.32704	2.04478	2.34822	0	3.53733	3.32121	2.37752	0.326651	0.873866	0.987796	0	-0.629747	0.193152	-1.04758	-0.338599	-1.78449	-1.92104
Q0297	Q0297 ... | YAL001C	0	0	1.82467	1.55036	1.28102	-0.137966	0	0	0.454561	2.77661	2.43357	-1.01066	-0.221657	0	-0.465724	-0.544212	1.57132	0.47881	0.66441	-0.16897
YBR148W	YBR148W ... YSW1 biological process unknown molecular function unknown cellular component unknown | YBR149W	0.525888	0.244005	0.365237	2.45681	0.989415	3.19242	0	1.98844	0.921278	1.44646	3.38323	1.65231	2.9959	0	-0.366713	-0.0774954	-0.0475849	1.98857	0.742412	1.30135
YBR019C	YBR019C ... GAL10 galactose metabolism UDP-glucose 4-epimerase activity cellular component unknown | YBR020W	2.13887	2.42154	-0.245721	1.82454	0.345559	1.89697	0	3.02015	2.91985	2.2214	2.91161	0.989343	1.61123	0	-0.78175	-0.48492	0.174808	0.786932	0.494485	0.815924
YFR012W-A	YFR012W-A ... YFR012W-A biological process unknown molecular function unknown cellular component unknown | YFR013W	0.345316	1.64394	0.0173133	0.907299	-0.069479	1.0225	0	1.40348	0.99928	0.999006	2.08749	-0.010657	0.0262703	0	0.540178	1.32244	1.53738	3.45466	0.0794474	1.07896
YIL119C	YIL119C ... RPI1 thiamin biosynthesis* small GTPase regulator activity nucleus | YIL120W	0.718934	1.40774	1.9104	2.94279	2.08146	2.85131	0	0.973239	1.02843	0.450385	0.825753	0.564845	0.814766	0	3.21598	3.70321	2.97433	3.54715	2.0688	2.87183
YMR101C	YMR101C ... SRT1 protein amino acid glycosylati prenyltransferase activity lipid particle | YMR102C	1.34532	1.68558	0.0173133	2.4095	1.51548	2.34443	0	3.14676	-0.585682	4.32093	2.81208	0.989343	0.0262703	0	1.95522	-0.584455	1.95242	2.10886	1.66441	1.07896
YIL167W	YIL167W	1.34532	0.90697	2.27107	2.99446	-0.417402	1.38507	0	1.40348	0.87375	2.56535	2.52829	0.269451	1.61123	0	3.89381	3.64436	1.4219	2.22434	-0.405979	0.441528
YJR095W	YJR095W ... SFC1 fumarate transport* succinate:fumarate antiporter activmitochondrial inner membrane | YJR096W	2.17539	2.49193	1.28035	4.77873	2.93052	3.51435	0	1.81852	2.32121	1.48443	3.17465	1.89623	2.11373	0	1.47093	1.00051	-2.36951	2.78693	0.886802	0.078958
YJR128W	YJR128W ... | YJR129C	0.982746	-0.0930299	1.60228	2.14647	1.21618	1.30388	0	-1.76645	-1.00072	2.99901	-0.995277	-0.894925	-1.01428	0	0.0424283	-0.24883	1.49708	0.966148	0	0.0384103
YGR174W-A	YGR174W-A ... YGR174W-A biological process unknown molecular function unknown cellular component unknown | YGR175C	2.5038	1.32201	3.3765	3.36673	1.25245	2.34443	0	0.240035	-0.585682	4.25127	2.89484	-0.010657	1.3482	0	0.376734	0.000507	2.50424	3.19162	0.66441	0.078958
YJR094C	YJR094C ... IME1 meiosis transcription regulator activity nucleus | YJR094W-A	1.25512	2.081	2.01731	2.69901	2.51548	-0.607014	0	2.11397	2.36493	3.66197	3.46415	4.68978	0.303649	0	-2.91925	-1.378	1.53738	3.6614	3.07945	-0.0911225
Q0070	Q0070 ... AI5_ALPHA movement of group I intron endonuclease activity mitochondrion | Q0075	0.0937775	2.5879	1.19485	1.76731	0	0	0	0.422588	1.58424	2.32779	1.92226	0	0	0	-1.16508	1.03445	0.626187	1.37189	0	0
YDR281C	YDR281C ... PHM6 biological process unknown molecular function unknown vacuole (sensu Fungi) | YDR282C	-1.23965	-0.262955	1.75428	0.672534	2.73788	0.344427	0	1.23355	0.414318	2.93761	1.93072	1.98934	1.61123	0	0.829685	0.737473	0.367453	2.04997	3.07945	1.88631
YLR312C	YLR312C iESR cluster YLR312C biological process unknown molecular function unknown cellular component unknown | YLR312W-A	2.08228	3.64394	4.13279	2.99446	2.73788	-0.429475	0	1.81852	3.16921	4.75389	2.75961	2.7967	-1.74763	0	-0.0447845	2.80786	2.36745	3.37189	2.40138	-2.10998
YEL039C	YEL039C iESR cluster CYC7 electron transport electron carrier activity mitochondrial intermembrane space | YEL040W	2.56771	1.90697	4.71775	0.824537	0.193555	0.263507	0	0.233554	0.584243	4.52257	0.589686	1.47477	-0.433161	0	0.370253	0.322435	3.95242	2.84583	0.757519	-0.573119
YLR042C	YLR042C ... YLR042C biological process unknown molecular function unknown cell wall (sensu Fungi) | YLR043C	0.345316	-0.677992	1.79492	3.09132	-0.801744	1.60746	0	1.06035	0.321209	0.999006	2.64858	-0.327885	1.02627	0	1.95522	1.32244	1.53738	1.69382	-0.652818	2.07896
Cluster_9	#N/A	0	0	0	0	0	0	0	0	0	0	0	0	0	0	0	0	0	0	0	0
YGR288W	YGR288W ... MAL13 regulation of transcription, D transcription factor activity nucleus | YGR289C	2.34532	2.84557	0.479419	0.592995	0.702362	1.02697	0	2.45078	2.24721	0.776613	0.664018	0.977786	1.04408	0	4.79316	5.5551	0.20807	0.184452	0.139568	0.509592
YOL158C	YOL158C ... ENB1 ferric-enterobactin transport ferric-enterobactin transporter actintegral to membrane* | YOL159C	0	4.08983	-1.59037	-1.78696	-0.310487	0.369664	0	0	4.08983	-0.599339	-0.835294	0.759223	1.15798	0	3.18883	7.36683	-1.24963	-1.39822	-0.150672	0.200948
YDR342C	YDR342C ... HXT7 hexose transport glucose transporter activity* mitochondrion* | YDR343C	-0.140111	1.19648	-0.442118	-3.39786	4.13472	-4.26851	0	0.259089	0.87375	-1.46043	-2.80263	4.13472	0	0	3.01823	4.56529	2.30034	0.990804	0.0794474	0
YOR032C	YOR032C ... HMS1 pseudohyphal growth transcription factor activity cellular component unknown | YOR032W-A	0.345316	0.322008	-0.351921	-0.885956	-1.74755	-0.170147	0	-0.181484	-0.00072	1.36674	-0.165202	-0.688729	0.348198	0	6.5098	6.82706	2.0535	2.87439	0.471765	1.53839
YDR077W	YDR077W ... SED1 cell wall organization and bio structural constituent of cell wallmitochondrion* | YDR078C	1.25028	2.12936	2.41625	0.254657	2.44789	2.74485	0	0.602025	0.594024	2.01526	-3.68556	-0.0805384	-0.312532	0	5.59591	5.58608	1.22401	0.724287	2.87305	3.11463
YDR170W-A	YDR170W-A YDR170W-A Ö TRANSPOSABLE TY ELEMENTYDR183C-A	0	0	0	0	-0.115283	2.707	0	-3.68662	0	0	0	0.23727	1.02627	0	5.76296	5.39118	0	0	0.538879	1.97204
Q0055	Q0055 ... AI2 RNA splicing RNA binding* mitochondrion | Q0060	0	-3.26205	-2.72769	0	0.622184	1.12209	0	-4.64176	-4.58478	0	0	0.864402	1.16391	0	7.85276	8.08001	0	0	0.175799	0.685564
YJL217W	YJL217W … REE1 biological process unknown molecular function unknown | Cytoplasmic protein involved in the regulation of enolase (ENO1); mRNA expression is induced by calcium shortage, copper deficiency (via Mac1p) and the presence of galactose (via Gal4p); mRNA expression is also regulated by the cell cycleYJL218W	0	0	-1.0896	-1.07237	0	0	0	0	0	-0.808349	-1.94281	0	0	0	5.0493	5.42649	0.189454	-0.0610651	0	0
YIR041W	YIR041W … PAU15 biological process unknown molecular function unknown | Putative protein of unknown functionYIR042C	-2.65468	-2.48535	-2.3566	-6.23602	-1.06948	-1.48552	0	0.676497	1.77689	-1.05714	-3.0329	0.311271	-0.97373	0	2.80071	4.96794	-1.44768	-0.975945	-1.05684	-1.48552
YNL034W	YNL034W ... YNL034W biological process unknown molecular function unknown cellular component unknown | YNL035C	3.98024	1.32201	0.374865	-0.251814	1.13488	1.82985	0	0.818516	-0.00072	-0.300555	-0.98048	-0.286291	0.504318	0	4.12514	4.45994	-0.838132	-1.22802	-1.19619	-0.0279572
YAL068C	YAL068C ... YAL068C biological process unknown molecular function unknown cellular component unknown | YAL069W	1.08716	0.963554	-2.76559	-7.33533	-0.0562229	-0.0163207	0	4.67481	4.61163	-1.62343	-2.98522	0.0713118	-0.0888523	0	2.92432	3.56367	-1.74802	-0.803084	-1.02644	-0.756328
YHL046C	YHL046C ... YHL046C biological process unknown molecular function unknown cellular component unknown | YHL046W-A	-0.294047	1.90697	-0.126657	-3.73241	0.311279	-1.29943	0	1.76412	3.45871	-0.358705	-3.10971	0.311279	-0.269408	0	4.56378	6.74197	-1.62893	-0.161611	0.311279	-0.269408
YKL224C	YKL224C … PAU16 biological process unknown molecular function unknown | Putative protein of unknown functionYKL225W	0.245781	0.213513	-1.96692	-5.03344	-2.00105	0	0	0.95602	0.736246	-0.745023	-3.13705	-0.942231	-1.06158	0	2.72075	3.97013	-0.960433	-0.410799	0	0
YBR301W	YBR301W ... DAN3 biological process unknown molecular function unknown cell wall (sensu Fungi) | YBR302C	0.639363	-0.441135	1.89358	-0.198091	1.66298	1.35192	0	0.639363	0	1.80294	-1.08459	0.810115	0.841653	0	8.00506	7.85575	0.0972931	0.706468	-3.02881	-2.45014
Q0110	Q0110 ... BI2 RNA splicing nuclease activity mitochondrion | Q0115	3.44842	-2.25019	0	0	0.222125	1.1619	0	3.44842	0	0	0	0.132083	0.393479	0	7.73	4.78145	0	0	-0.0283558	0.509592
YGR294W	YGR294W ... YGR294W biological process unknown molecular function unknown cellular component unknown | YGR295C	5.00828	1.32201	1.8502	-0.565206	0.440089	-0.24067	0	8.23637	5.68298	1.75146	-1.06155	-0.432544	-0.643672	0	6.74963	5.21774	-0.495789	-0.827778	-4.31608	-4.18983
YIL057C	YIL057C ... YIL057C biological process unknown molecular function unknown cytoplasm | YIL058W	-0.239646	0.90697	-1.09816	-1.62292	1.21209	0.32916	0	-0.181484	-1.00072	-0.309117	-0.814705	-0.168198	-0.0122039	0	6.06374	5.80786	0.609527	1.28943	-2.19357	-1.84704
YCR104W	YCR104W ... PAU3 biological process unknown molecular function unknown cellular component unknown | YCR105W	-0.602216	-1.07654	0.516967	-0.904525	-2.17274	-3.9306	0	1.45595	1.99928	1.07147	0.0370729	-1.87371	-2.36746	0	6.75504	7.64113	0.126788	0.289443	-6.48648	-6.21321
YAR033W	YAR033W ... MST28 vesicle organization and bioge protein binding endoplasmic reticulum* | YAR035C-A	2.59702	0	-0.660759	0.00510947	-0.554906	-0.340072	0	0.818516	0	-0.193639	-0.201728	-2.23305	0.178273	0	5.5098	3.0346	0.411847	-0.419519	-0.727907	-0.506005
YBR050C	YBR050C ... REG2 negative regulation of transcr protein phosphatase type 1 activityprotein phosphatase type 1 complex | YBR051W	-0.239646	3.24942	-0.567649	-3.63986	-0.867036	2.34443	0	2.40348	1.58424	-0.000994	-0.28975	-0.223251	3.4857	0	2.76257	2.32244	0.952415	0.409996	-1.30307	2.66392
Cluster_10	#N/A	0	0	0	0	0	0	0	0	0	0	0	0	0	0	0	0	0	0	0	0
YBR021W	YBR021W ... FUR4 uracil transport uracil permease activity plasma membrane* | YBR022W	0.328038	0.597115	-0.878098	-0.306707	-0.267418	0.664045	0	1.81852	1.81871	-1.73435	-0.435849	-0.313066	0.455663	0	0.277144	0.436606	-0.808247	-0.57093	-1.18359	-0.394973
YGL208W	YGL208W iESR cluster SIP2 protein amino acid phosphoryla AMP-activated protein kinase activicytoplasm* | YGL209W	2.15724	1.14304	-0.066751	0.270602	0.473048	0.478877	0	1.74452	0.646979	-0.114205	-0.103801	0.247141	0.0262703	0	0.85568	0.222899	0.131385	0.485762	-1.63676	-0.646867
YDR134C	YDR134C	-1.02814	0.220128	-0.634763	-0.875902	-0.069479	0.0224985	0	-0.300128	-0.250698	-1.46043	-1.3034	0.211735	-0.710695	0	0.836571	0.844856	2.30034	1.00536	2.19492	2.61501
YLL062C	YLL062C ... MHT1 sulfur amino acid metabolism homocysteine S-methyltransferase accytoplasm | YLL063C	-1.39952	-1.37773	0.437422	1.03044	-0.779293	-0.143511	0	-0.18485	-0.23685	-0.369382	1.02911	-0.484173	0.146565	0	0.184796	0.0201741	1.36491	1.7241	-0.323185	0.628645
YER068C-A	YER068C-A … Dubious Dubious open reading frame unlikely to encode a functional protein, based on available experimental and comparative sequence dataYER076W-A	-0.239646	0	2.16409	-0.404645	-2.21678	-2.28108	0	1.89043	-2.01492	-0.761109	-2.22446	0	-2.27731	0	1.89043	0	0	-0.857288	0	-2.22462
YDR133C	YDR133C ... | YDR135C	-1.36518	-0.443527	-2.15261	-1.11888	0	2.0225	0	-1.59652	-0.280827	-1.17092	-1.05417	-1.79539	0.0262703	0	0.692181	1.37248	2.30605	1.00106	1.29471	3.66392
YIL169C	YIL169C ... YIL169C biological process unknown molecular function unknown cellular component unknown | YIL171W-A	0.157779	0.973484	-1.40018	-1.47843	-0.819836	0.717068	0	0.0638364	0.827291	-2.60316	-1.68877	-1.18374	-0.310421	0	2.89941	2.91915	-0.409496	-0.758484	-1.0889	0.270242
YHR210C	YHR210C ... YHR210C biological process unknown molecular function unknown cellular component unknown | YHR211W	1.30784	0.322008	0.561634	-0.508038	-0.069479	0.48193	0	0.950967	0.568646	0.771595	0.0465434	0.190977	0.348198	0	1.32086	1.06868	2.76833	3.01235	0.66441	0.985849
YPL021W	YPL021W ... ECM23 pseudohyphal growth molecular function unknown cellular component unknown | YPL022W	2.34532	0.322008	0.194463	1.4095	-1.60145	-1.66575	0	1.81852	1.73625	1.17616	1.58969	-2.54262	-1.66198	0	2.27509	-1.58446	0.129565	2.78693	-2.45252	-0.609288
YMR189W	YMR189W ... GCV2 one-carbon compound metabolism glycine dehydrogenase (decarboxylatmitochondrion* | YMR190C	-0.256267	0.304619	-0.83619	-0.895902	-0.074353	0.572434	0	-0.157153	0.00232732	-0.722774	-1.47699	0.570245	1.17577	0	0.484536	0.829056	1.46592	0.908024	-0.135261	0.601741
YLR438W	YLR438W ... CAR2 arginine catabolism ornithine-oxo-acid transaminase actcytoplasm* | YLR439W	0.946314	0.299288	-0.66489	-0.533015	-0.914821	-1.33725	0	-0.315576	-0.702166	-0.492013	-0.671651	-0.179633	0.0399165	0	1.99728	0.675456	1.50175	0.936081	0.456498	-0.340657
YAR050W	YAR050W ... FLO1 flocculation (sensu Saccharomy mannose binding cell wall (sensu Fungi) | YAR053W	0.0900592	0.482472	-0.345257	-0.229911	-0.67093	0.196528	0	0.35053	0.941565	-0.948527	-0.502237	0.0534733	-0.304936	0	0.205194	0.971938	0.0555086	0.0981335	1.94194	2.32494
YEL049W	YEL049W ... PAU2 biological process unknown molecular function unknown cellular component unknown | YEL050C	-0.933406	-1.49499	0.760308	-0.737677	1.67351	1.40068	0	1.01878	1.55838	0.988314	-0.29349	0.435898	0.330319	0	0.215044	1.29309	-0.188715	0.642941	-3.07497	-2.55857
YGR138C	YGR138C ... TPO2 polyamine transport spermine transporter activity plasma membrane* | YGR139W	0.0772108	0.395071	0.874573	-0.123468	-1.89955	-1.11501	0	-0.127661	0.266472	1.02491	-0.247761	-1.10377	-1.11123	0	0.712289	0.521623	1.28683	1.12988	2.98634	3.50827
YKR093W	YKR093W ... PTR2 peptide transport peptide transporter activity plasma membrane | YKR094C	-0.41022	-0.552461	-0.30098	-0.247137	-0.561768	-0.0828791	0	-1.1106	-1.32312	-1.14294	-0.947631	-0.784084	-0.279666	0	2.41653	1.44203	0.64703	0.357076	-0.011491	0.389708
YPL222C-A	YPL222C-A … Dubious Identified by gene-trapping, microarray-based expression analysis, and genome-wide homology searchingYPL250W-A	-0.391649	-0.941027	-0.459125	-1.84531	-0.120105	-0.784856	0	0.584051	1.11476	0.246933	-0.42412	-0.010657	0.569413	0	1.88121	1.80786	0.237817	-0.698495	0.680898	-0.143434
YLR037C	YLR037C ... DAN2 biological process unknown molecular function unknown cell wall (sensu Fungi) | YLR038C	-0.538385	-1.46966	0.813477	0.19998	-0.00366219	-1.12	0	0.803747	1.48577	0.971528	0.259431	-0.862978	-0.88062	0	3.12366	3.94239	0.562494	0.600725	-2.23812	-2.07391
YFL014W	YFL014W iESR cluster HSP12 response to oxidative stress* molecular function unknown cytoplasm* | YFL015C	-0.0831026	1.62564	0.513989	-3.53803	0.193555	1.13798	0	-0.0831026	1.62564	2.5674	-3.94281	-1.01066	-0.558692	0	-0.629747	1.62564	-1.10813	-0.778131	-1.65752	-0.506005
YBR208C	YBR208C ... DUR1,2 allantoin catabolism* allophanate hydrolase activity* cytoplasm | YBR209W	1.22098	1.70324	0.28834	0.441667	-1.01417	-0.122334	0	1.86887	1.67667	-0.0432861	0.837285	-0.356114	0.177937	0	1.76144	1.92133	-0.197452	0.00194471	-1.95864	-1.19707
Q0255	Q0255 ... Q0255 biological process unknown molecular function unknown mitochondrion | Q0275	-0.529153	2.23955	0.735031	1.51198	0.123166	-0.055504	0	-1.05595	0.529795	0.66014	-0.0205562	-2.08105	-1.89973	0	-0.749329	2.41554	-0.0606806	0.49643	0.68713	0.354592
YOR374W	YOR374W iESR cluster ALD4 ethanol metabolism aldehyde dehydrogenase (NAD) activimitochondrion* | YOR375C	0.216274	0.585583	0.689361	-0.393368	0.857272	1.03341	0	-1.72838	-1.08778	0.295708	-1.41998	-0.107717	0.0335505	0	1.58699	1.74234	1.40922	1.73247	0.027509	0.38277
YMR058W	YMR058W ... FET3 high affinity iron ion transpo ferroxidase activity plasma membrane | YMR059W	2.21979	1.21509	-0.59274	0.268144	-1.51005	0.192424	0	1.62587	-1.80807	-0.537047	-0.639133	-0.799153	0.348198	0	3.34753	0.778115	-0.205126	-0.81253	0.355082	1.16642
YOR152C	YOR152C iESR cluster YOR152C biological process unknown molecular function unknown membrane fraction | YOR153W	1.02339	0.800548	0.0597485	-0.705303	0.888293	1.19556	0	2.11375	2.24822	1.65572	0.0525188	1.15927	1.19933	0	0.414647	0.287388	-0.721357	-0.633177	-0.519454	-0.112341
YIL171W	YIL171W	0	0	-1.56765	-0.760425	0	0	0	0	0	-1.58596	0.419761	0	0	0	-1.54664	0	2.17481	3.05995	0	0
YLR194C	YLR194C ... YLR194C biological process unknown molecular function unknown cell wall (sensu Fungi) | YLR195C	-0.278688	-0.566347	0.490359	-1.28711	1.05363	0.95242	0	-0.209773	-0.0342721	1.64463	-1.84943	0.25269	-0.0875496	0	-0.116575	0.17815	-1.48942	-1.1383	-0.765925	-0.112266
YOR317W	YOR317W iESR cluster FAA1 lipid metabolism* long-chain-fatty-acid-CoA ligase acmitochondrion* | YOR318C	1.15267	2.75497	-1.15261	0.654612	-0.391407	-0.0844167	0	0.403479	0.99928	-3.17092	0.642153	-0.747623	-1.78108	0	-0.23743	-2.32142	0.104418	-0.575638	-1.24248	-1.14343
YGL158W	YGL158W ... RCK1 protein amino acid phosphoryla protein serine/threonine kinase actcellular component unknown | YGL159W	0.438426	0.852522	1.26885	0.714354	-0.962564	0.70057	0	1.08155	0.414318	0.816142	-1.17585	-0.389169	0.704342	0	0.21825	-2.16942	-0.0475849	0.984871	-0.0360298	2.56438
YJR153W	YJR153W ... PGU1 pseudohyphal growth* polygalacturonase activity extracellular region | YJR154W	-0.250874	-0.482862	0.155712	0.626396	-1.93266	-1.68764	0	-1.00289	-0.238114	-0.427567	0.806582	-2.09623	-1.68387	0	1.57334	1.87859	0.565013	1.66762	-2.1942	-1.35555
YMR081C	YMR081C iESR cluster ISF1 aerobic respiration molecular function unknown cellular component unknown | YMR082C	-0.891723	-0.262955	-0.0351541	-0.776913	-0.679532	-0.621358	0	0.0595245	0.114758	-0.808349	-0.995277	-0.781175	-0.710695	0	2.56187	3.01546	1.16743	1.60362	-2.19357	-0.864459
YHL047C	YHL047C ... ARN2 iron ion homeostasis* siderophore-iron transporter activiplasma membrane* | YHL048C-A	0	0	-0.00764747	-1.83295	0.177681	0.978443	0	0	0	0.0500583	-1.52755	0.365611	0.93099	0	2.61448	2.92217	-0.958813	-0.995038	-0.379984	0.601104
YOL151W	YOL151W iESR cluster GRE2 response to stress oxidoreductase activity* cytoplasm* | YOL152W	-0.810182	-0.474164	1.11954	0.335698	0.115129	-0.610586	0	0.930085	0.95944	1.44276	-0.0952182	-0.13994	-0.586707	0	-0.0375529	-0.25023	0.764087	0.431242	-0.605051	-0.927585
YHR079C-A	YHR079C-A ... SAE3 meiotic recombination* molecular function unknown condensed nuclear chromosome | YHR080C	1.24406	0	-0.0964384	-0.173319	-1.57042	-1.63472	0	1.24406	-1.36856	-0.114746	0.421904	-1.5116	0	0	1.24406	-0.367334	-0.161337	1.20411	-1.42149	0
YJL216C	YJL216C ... YJL216C biological process unknown "hydrolase activity, hydrolyzing O-g"cellular component unknown | YJL217W	-0.239646	-0.135674	-0.126051	0.54492	-0.876834	0.0224985	0	0.0617876	-0.329668	0.265286	0.630328	-1.81801	-0.781085	0	-1.41157	-1.1314	0.457207	0.54842	-2.72791	0.856566
YPR077C	YPR077C ... | YPR078C	0	-0.476468	1.28028	-1.18892	0.930521	-1.06535	0	-0.271218	-0.799195	1.77655	-1.00873	1.57431	-2.06158	0	0	0	-1.59197	0	1.93157	0
YHR136C	YHR136C ... SPL2 response to temperature enzyme inhibitor activity cytoplasm | YHR137C-A	-0.0470012	-1.18049	-0.535228	-1.35989	-0.972182	0.185997	0	1.57595	1.15975	1.29446	0.267758	-0.436922	0.33661	0	2.98075	2.45994	2.03214	2.871	0.975111	2.31774
YML123C	YML123C ... PHO84 phosphate transport* inorganic phosphate transporter actintegral to plasma membrane | YML124C	-3.53128	-2.96653	-2.57715	-1.67979	-2.3154	-0.378864	0	0.268524	0.458371	-0.100689	-0.75453	-1.05462	0.337856	0	0.923294	0.86962	0.321775	0.589486	0.123145	1.6903
YMR194C-B	YMR194C-B ... YMR194C-B biological process unknown molecular function unknown cellular component unknown | YMR194W	-0.877076	0.322008	0.27107	0.13266	0.100446	-0.103032	0	-1.18148	1.48471	-0.794543	0.00472325	-1.42569	-1.38877	0	1.27714	2.32244	0.29637	1.39461	-0.598624	-0.921042
YAR071W	YAR071W ... PHO11 phosphate metabolism acid phosphatase activity extracellular region | YAR073W	-0.239646	0.90697	-1.76696	-1.17546	0.252449	0.524999	0	2.32102	0.99928	-0.867728	-0.50985	0.429916	1.14175	0	0.370253	-0.999493	-1.09489	0.127969	0.0794474	0.703449
YJL219W	YJL219W ... HXT9 hexose transport glucose transporter activity* plasma membrane | YJL220W	1.17539	-0.262955	-2.72262	0.239575	1.15291	0.458598	0	1.23355	0.501781	-1.74093	2.62404	0.652308	0.52377	0	2.28528	-2.58446	-1.20256	1.6614	0.494485	-0.00850488
YMR120C	YMR120C ... ADE17 purine nucleotide biosynthesis IMP cyclohydrolase activity* cytosol | YMR121C	-0.09481	0.412872	-0.649982	-1.64091	-0.610631	-1.13619	0	0.693092	0.640262	-0.498169	-1.18956	-0.79391	-0.517986	0	1.08674	1.52678	-0.0431764	-0.714473	-0.140044	0.00422839
Q0120	Q0120 ... BI4 Group I intron splicing RNA binding mitochondrion | Q0130	-0.0989474	0.662648	0	0	-0.00497458	0.889085	0	0.471446	-0.273581	0	-4.37421	-0.291585	0.00795009	0	0.545641	1.25378	0	0	-0.735096	-0.0395565
YJR020W	YJR020W ... | YJR021C	-0.239646	0.322008	-1.36729	0.4095	-0.069479	0.0224985	0	0.514916	-0.00072	-0.3856	0.00472325	1.77179	1.02627	0	-0.0447845	1.00051	1.88974	1.37189	1.07945	1.07896
YOR298W	YOR298W ... MUM3 spore wall assembly (sensu Fun acyltransferase activity cellular component unknown | YOR299W	-0.824609	-0.610878	-2.16489	-1.39786	-2.70175	-1.91812	0	0.192912	-0.305574	0.0705589	-0.658242	-2.47943	-2.16811	0	1.20033	1.51508	-0.345265	0.984315	-2.80436	-1.77147
YGR243W	YGR243W ... FMP43 biological process unknown molecular function unknown mitochondrion | YGR244C	0.388385	-0.414958	0.0173133	-3.17546	1.36348	1.11442	0	-0.318987	-0.00072	-0.960352	-1.71517	0.252377	0.422199	0	2.25067	1.87498	0.0325854	0.0881014	-0.113198	-0.214773
Cluster_11	#N/A	0	0	0	0	0	0	0	0	0	0	0	0	0	0	0	0	0	0	0	0
YOR086C	YOR086C ... TCB1 biological process unknown lipid binding mitochondrion | YOR087W	-0.649676	-0.189771	0.0980076	0.122185	0.239571	0.685319	0	-0.317411	-0.245161	-0.0547263	0.0470893	0.444441	0.474186	0	0.388414	0.520438	0.3848	0.497478	-0.0681195	0.471537
YNL129W	YNL129W ... NRK1 nicotinamide riboside metaboli nicotinamide riboside kinase activicytoplasm | YNL130C	-0.532428	0.0838479	-0.41208	0.0797943	-0.183736	0.566011	0	0.33309	0.605002	0.0132195	0.653411	0.321487	0.938807	0	0.625908	1.09165	-0.457869	-0.20379	-0.67224	0.256198
YDR065W	YDR065W ... YDR065W biological process unknown molecular function unknown mitochondrion | YDR066C	0.39112	0.247046	-0.115137	0.59975	-0.290449	1.44671	0	0.759138	0.280462	-0.458845	0.128459	-0.173132	0.950719	0	1.49287	1.32608	0.0853094	0.320755	-0.438789	1.24561
YAR031W	YAR031W ... PRM9 vesicle organization and bioge molecular function unknown endoplasmic reticulum* | YAR033W	0.875831	0.883887	0.0173133	-1.06855	-0.262124	1.0225	0	0.349031	0.191926	-1.00099	-0.373788	-0.688729	0.833625	0	2.56665	2.38955	0.537378	-0.59158	-0.598624	0.400886
YMR280C	YMR280C ... CAT8 positive regulation of transcr specific RNA polymerase II transcrinucleus | YMR281W	-0.515281	0.322008	-0.805809	-0.812893	0.304917	0.730318	0	0.102309	0.361851	0.645369	-0.580239	0.626773	0.248663	0	1.13209	2.17043	1.26174	1.41698	0.182541	-0.0205777
YGR150C	YGR150C ... YGR150C biological process unknown molecular function unknown mitochondrion | YGR151C	-0.0647905	0.142458	-0.431495	0.283969	-0.033375	0.820687	0	-0.0246392	-0.283845	-0.439714	0.151565	0.294867	0.572823	0	0.801865	0.917593	0.0492285	0.341919	-0.415573	0.35026
YNL128W	YNL128W ... TEP1 spore wall assembly (sensu Fun inositol or phosphatidylinositol phcellular component unknown | YNL129W	0.193313	1.23955	0.464772	0.864066	-0.366461	0.250768	0	-0.0439801	0.736246	1.89713	1.47865	0.0866402	0.540843	0	0.803212	2.32244	0.580446	0.902409	-0.887386	0.271603
YKR072C	YKR072C ... SIS2 G1/S transition of mitotic cel phosphopantothenoylcysteine decarbocytoplasm* | YKR073C	-0.43303	0.00742151	-0.603319	0.0396732	-0.247751	0.318085	0	0.129023	-0.155998	-0.371001	-0.248213	0.0186373	0.44307	0	0.269886	0.896759	-0.159358	0.02033	-0.461794	0.235891
YGL179C	YGL179C ... TOS3 glucose metabolism protein kinase activity cytoplasm* | YGL180W	0.189002	0.291245	-0.177747	0.437237	0.43511	0.948057	0	0.277326	0.23982	-0.0737507	0.571164	0.587668	1.16453	0	1.51024	1.54222	0.0345018	0.268238	0.168999	0.749686
YDL103C	YDL103C ... QRI1 UDP-N-acetylglucosamine biosyn UDP-N-acetylglucosamine diphosphorycytoplasm* | YDL104C	-0.37282	0.197796	-0.305331	0.26871	-0.0605597	0.275676	0	-0.0702381	-0.00072	-0.243565	0.278775	-0.188994	0.424555	0	0.582907	0.823124	-0.0248648	0.367607	-0.322971	0.250306
YHL032C	YHL032C ... GUT1 glycerol metabolism glycerol kinase activity cytoplasm | YHL033C	0.130376	0.256283	-0.178607	0.149377	0.12669	0.586399	0	0.0651564	0.412857	-0.150455	0.163269	0.572213	1.11349	0	0.979463	1.30244	0.470191	0.536954	0.28924	0.790612
YLR429W	YLR429W ... CRN1 actin filament organization* "protein binding, bridging*" actin cortical patch | YLR430W	-0.124394	0.262621	-0.415012	0.0552301	-0.431306	0.20623	0	-0.088923	-0.263209	-0.484519	0.222084	-0.12012	0.516383	0	0.553448	0.711051	0.158972	0.324923	-0.366165	0.435475
YJR015W	YJR015W ... YJR015W biological process unknown molecular function unknown cytoplasm* | YJR016C	0.0717512	0.271382	0.10976	-0.215598	0.778518	1.76218	0	-0.174941	0.0896667	0.117092	-0.638024	0.321419	1.38581	0	0.72075	0.965893	-0.431836	-0.334015	0.14579	1.24586
YJR003C	YJR003C PAC cluster YJR003C biological process unknown molecular function unknown mitochondrion | YJR004C	-0.47182	0.212383	-0.281095	-0.0344625	-0.506212	0.490834	0	0.194026	0.10116	0.0383991	0.0484888	-0.235444	0.719133	0	1.25356	1.30117	-0.194605	-0.0507337	-0.149539	1.05287
YGR014W	YGR014W ... MSB2 establishment of cell polarity osmosensor activity integral to plasma membrane* | YGR015C	-0.167318	0.0910417	0.132479	0.141372	-0.649779	0.624525	0	0.305689	0.340274	-0.383724	0.439852	-0.206184	0.447222	0	1.06956	0.880231	0.264427	0.459611	-0.309127	0.675589
YDR477W	YDR477W ... SNF1 protein amino acid phosphoryla AMP-activated protein kinase activicytoplasm* | YDR478W	-0.220017	-0.063563	-0.0873203	0.173592	-0.204385	0.217444	0	-0.194115	-0.191403	0.282021	0.170639	-0.15598	0.420049	0	0.0115917	0.250602	0.308373	0.464463	-0.324213	0.272562
YJL042W	YJL042W ... MHP1 cell wall organization and bio structural constituent of cytoskelemicrotubule | YJL043W	-0.026299	0.130601	-0.00027	-0.24095	-0.303196	0.297061	0	-0.195983	-0.0850537	0.190995	-0.143762	0.00251374	0.403288	0	0.378794	0.528128	0.411767	0.456197	-0.351452	0.192366
YLR327C	YLR327C … iESR cluster TMA10 (RBF9) biological process unknown molecular function unknown nucleus | Protein of unknown function that associates with ribosomesYLR328W	-0.062662	0.0386532	0.277656	0.00469572	0.541152	1.31144	0	0.0601634	0.370791	0.402075	-0.263948	0.151971	0.878789	0	1.91378	2.26795	0.0941132	0.599444	-0.981225	0.486255
YDR516C	YDR516C iESR cluster EMI2 sporulation (sensu Fungi) molecular function unknown cytoplasm | YDR517W	-0.665524	-0.0128252	0.134461	-0.242865	0.947131	0.571759	0	-0.908005	-0.0305264	0.466023	0.339912	0.884171	0.623352	0	1.18711	1.82758	0.657505	0.938064	0.358502	0.295051
YKL213C	YKL213C ... DOA1 ubiquitin-dependent protein ca molecular function unknown cytoplasm* | YKL214C	-0.0638246	0.188199	-0.000325	0.125969	0.220434	0.451543	0	-0.0163316	-0.0330264	-0.202061	-0.151157	0.0264278	0.345985	0	0.346471	0.62418	-0.214677	-0.000266	-0.54956	0.0576893
YGL202W	YGL202W ... ARO8 aromatic amino acid family met aromatic-amino-acid transaminase accytoplasm | YGL203C	-0.56743	-0.120287	-0.198488	0.174166	-0.116595	0.319087	0	-0.0999816	0.124915	-0.388225	0.361282	0.388537	0.871423	0	0.490374	0.334597	-0.296723	-0.239868	-0.457134	0.0287722
YIR042C	YIR042C ... YIR042C biological process unknown molecular function unknown cellular component unknown | YJL001W	-0.0532332	0.791493	-0.034943	0.671421	0.861258	0.552356	0	0.937815	0.976913	-0.222437	0.286009	1.23252	0.873318	0	0.838702	0.943924	-0.860653	-0.434626	-0.494288	-0.245106
YNL032W	YNL032W ... SIW14 endocytosis* protein tyrosine phosphatase activicytoplasm | YNL033W	-0.0583165	0.68714	-0.472492	-0.0762532	0.130027	0.892731	0	0.403479	0.0107761	-0.411182	-0.317205	0.129068	0.590399	0	0.395788	0.678579	-0.429014	-0.528896	-0.436873	0.522793
YJR009C	YJR009C ... TDH2 glycolysis* glyceraldehyde-3-phosphate dehydrogcytoplasm* | YJR010C-A	-0.00935369	0.499115	-0.0689143	0.152827	-0.000215	-0.128223	0	-0.206742	0.718291	-0.860122	0.637651	0.357241	0.835397	0	1.45741	1.29599	0.379315	0.232338	0.924536	1.11833
YGR208W	YGR208W ... SER2 serine family amino acid biosy phosphoserine phosphatase activity cytoplasm* | YGR209C	-0.112342	0.413043	-0.570165	-0.139434	0.181746	0.0163724	0	-0.0688758	0.247499	-0.611312	-0.0912634	0.0975644	0.472302	0	0.431487	0.730824	-0.206867	-0.389225	-0.155633	0.278464
YGR032W	YGR032W ... GSC2 cell wall organization and bio "1,3-beta-glucan synthase activity"prospore membrane* | YGR033C	-0.0760618	-0.161164	0.630789	-0.285746	0.171529	0.724629	0	0.303756	1.04274	0.988687	-0.245292	-0.25351	-0.0613247	0	1.42297	1.94716	0.247301	0.608744	-0.309073	0.483173
YOL064C	YOL064C ... MET22 sulfate assimilation* "3'(2'),5'-bisphosphate nucleotidase"cytoplasm | YOL065C	-0.435644	-0.0484504	-0.012887	0.673699	0.665524	0.615001	0	0.243641	0.437533	0.125102	0.884429	0.78416	1.089	0	0.972164	1.07037	-0.00475593	0.0586834	0.0109739	0.129524
YOR316C	YOR316C ... COT1 zinc ion homeostasis* "di-, tri-valent inorganic cation tr"mitochondrion* | YOR316C-A	0.232616	0.614884	0.408135	0.149389	1.38902	1.0193	0	0.553813	1.07386	-0.057504	-0.0688154	0.655536	0.49824	0	0.4454	0.984179	-0.364442	-0.3953	-0.189739	-0.438358
YKL155C	YKL155C ... RSM22 protein biosynthesis structural constituent of ribosome mitochondrial small ribosomal subun | YKL156W	0.013738	-0.13485	-0.301574	0.283969	0.21965	0.840241	0	0.270585	-0.335587	-0.175492	0.111346	0.0303314	0.660891	0	0.931946	1.16124	0.36288	0.524717	-0.271882	0.684358
YLR148W	YLR148W ... PEP3 late endosome to vacuole trans protein binding vacuolar membrane (sensu Fungi)* | YLR149C	-0.211077	0.441471	-0.0637583	0.261898	-0.183701	0.779293	0	0.393829	0.179547	0.231499	0.274033	0.0380372	0.540843	0	0.388175	0.892793	-0.0754447	0.435309	-0.750149	0.393137
YHR011W	YHR011W ... DIA4 aerobic respiration* serine-tRNA ligase activity cytoplasm* | YHR012W	0.269367	0.22768	-0.38249	0.383737	-0.149649	0.472751	0	0.498898	0.265355	-0.666258	-0.00810079	-0.24283	0.293492	0	1.0792	1.45828	0.37204	0.490315	-0.585685	0.237656
YGR122W	YGR122W ... YGR122W biological process unknown molecular function unknown cytoplasm | YGR123C	-0.0374574	-0.0114161	0.113209	0.113163	0.518467	0.788939	0	0.390655	-0.0238032	0.465182	0.362984	0.433213	0.5357	0	1.2225	1.43686	-0.123936	0.106922	-0.503277	-0.0165494
YDR539W	YDR539W ... YDR539W biological process unknown molecular function unknown cytoplasm | YDR540C	0.323145	1.36976	0.043737	0.349826	0.568271	0.143442	0	0.555482	1.63869	0.131409	0.554179	0.245891	0.362368	0	1.38082	2.23671	0.210552	0.510743	-0.0899176	-0.230533
YOR158W	YOR158W ... PET123 protein biosynthesis structural constituent of ribosome mitochondrial small ribosomal subun | YOR159C	0.2495	0.409955	-0.387262	0.336102	0.0482746	0.65094	0	0.23138	0.220495	-0.255236	0.0800114	-0.129664	0.864165	0	0.794495	1.09233	0.242494	0.383299	-0.572629	0.570346
YLR460C	YLR460C ... YLR460C biological process unknown molecular function unknown cellular component unknown | YLR461W	0.0175116	0.262065	0.401398	-0.423533	1.06212	0.446773	0	0.77082	0.926163	1.41914	-0.151591	1.01876	0.138674	0	2.24872	1.92518	0.239445	0.0695848	-0.0864307	-0.564186
YFL018C	YFL018C ... LPD1 glycine catabolism* glycine dehydrogenase (decarboxylatmitochondrial nucleoid* | YFL019C	-0.268686	0.207513	0.0528397	0.247749	0.488778	0.703758	0	0.128899	0.323042	0.244618	0.543036	0.406112	0.744905	0	0.614875	0.955253	0.0320993	0.383325	-0.198277	0.294533
Q0275	Q0275 ... COX3 aerobic respiration* cytochrome-c oxidase activity respiratory chain complex IV (sensu | Q0297	0.236119	0.814255	0.911095	0.703988	0.401497	1.06251	0	-0.0382551	-0.142128	0.916622	0.00472325	-0.355838	0.473898	0	2.33505	2.93061	0.2964	0.229558	0.808001	0.855932
YMR188C	YMR188C ... MRPS17 protein biosynthesis* structural constituent of ribosome mitochondrial small ribosomal subun | YMR189W	-0.0658792	0.147677	-0.580588	0.416956	-0.693436	0.607461	0	0.119519	-0.0852531	-0.164493	-0.0878879	-0.224525	0.524724	0	0.293212	0.792702	0.294807	0.552027	-0.827443	0.15696
YNL206C	YNL206C ... RTT106 negative regulation of DNA tra molecular function unknown nucleus | YNL207W	-0.376148	0.230215	-0.590919	0.09524	-0.189773	0.653392	0	0.0149136	0.0382746	-0.574461	-0.113202	-0.490767	0.432148	0	0.649477	0.793676	-0.406039	0.050665	-0.293305	0.530065
YPL116W	YPL116W ... HOS3 histone deacetylation histone deacetylase activity cytoplasm* | YPL117C	-0.383556	0.0271027	-0.203493	0.110341	-0.221482	0.312701	0	0.122066	-0.0796204	-0.120047	0.167328	-0.0405585	0.255752	0	0.45879	0.634469	0.367453	0.554858	0.00739251	0.644659
YGR109W-B	YGR109W-B YGR109W-B Ö TRANSPOSABLE TY ELEMENTYGR161C-C	0.0233881	0.464027	0	0	-0.340781	-0.00921035	0	-0.0883742	-0.00072	0	0	0.181988	0.385351	0	2.04079	2.50008	0	0	-0.920553	0.109985
YHR043C	YHR043C ... DOG2 response to stress* 2-deoxyglucose-6-phosphatase activicytoplasm* | YHR044C	0.0851934	0.489735	-0.130888	0.662671	0.650525	0.38837	0	-0.166984	-0.040797	-0.825581	0.859886	0.366413	0.668579	0	2.09073	2.0395	0.372203	0.630764	-0.157592	0.0458603
YPL091W	YPL091W ... GLR1 response to oxidative stress glutathione-disulfide reductase actcytoplasm* | YPL092W	-0.0256089	0.402573	-0.0528128	0.0211976	0.741311	0.670747	0	-0.00733893	0.194969	-0.311124	-0.187692	0.218825	0.446957	0	0.987806	1.20785	0.366136	0.361672	0.0288214	0.276648
YIL072W	YIL072W ... HOP1 meiosis* DNA binding condensed nuclear chromosome* | YIL073C	0.54885	1.05897	0.42257	1.2902	0.136972	0.153743	0	0.681013	1.28879	0.461978	1.28483	0.681221	-0.196122	0	1.95522	2.93911	0.524321	0.994527	0.379008	0.078958
YNL045W	YNL045W … LAP2 lipid metabolism* aminopeptidase activity* | Leucyl aminopeptidase yscIV (leukotriene A4 hydrolase) with epoxide hydrolase activity, metalloenzyme containing one zinc atom; green fluorescent protein (GFP)-fusion protein localizes to the cytoplasm and nucleusYNL046W	0.00936453	0.288399	0.398821	0.158457	0.611797	0.70853	0	-0.178741	0.377975	-0.10731	-0.0425317	0.263645	0.491964	0	0.82531	0.805148	0.290517	0.381768	-0.14972	0.17088
YIL068C	YIL068C ... SEC6 cytokinesis* protein binding bud tip* | YIL068W-A	0.138865	0.230169	-0.395989	0.129562	-0.369653	0.601462	0	0.510394	0.178357	-0.346552	0.160476	-0.325628	0.539646	0	0.694399	0.974858	-0.147307	0.257211	-0.861978	0.338496
YGR180C	YGR180C ... RNR4 DNA replication ribonucleoside-diphosphate reductascytoplasm* | YGR181W	-0.55976	-0.0552367	0.0167653	0.205429	0.115223	0.253385	0	0.070322	0.054936	0.0230194	0.258072	0.12209	0.527109	0	0.899911	0.940605	-0.377424	-0.432447	-0.465665	0.0534198
YJL213W	YJL213W ... YJL213W biological process unknown molecular function unknown cellular component unknown | YJL214W	0.00294286	-0.00879082	-0.138494	0.421573	-0.0715545	0.174826	0	0.284834	0.00935165	-0.486858	0.374907	0.41821	0.92809	0	2.04936	2.03884	0.190622	0.444875	-0.91641	-0.248653
YHL035C	YHL035C ... VMR1 transport "ATPase activity, coupled to transme"mitochondrion* | YHL036W	0.299658	0.468451	0.515107	-0.13207	0.948532	1.74735	0	0.695435	0.529795	-0.0782138	-0.358044	0.238415	0.7455	0	0.900249	0.79192	-0.378942	0.0561477	-0.491088	0.249398
YKR098C	YKR098C ... UBP11 biological process unknown ubiquitin-specific protease activitcellular component unknown | YKR099W	1.3947	1.19975	-0.172658	-0.0361472	0.87065	1.70779	0	2.07436	1.67735	0.0897711	0.303868	1.17869	1.67226	0	1.32375	1.47299	0.0254786	0.468324	-0.586943	0.460207
YGL062W	YGL062W ... PYC1 gluconeogenesis* pyruvate carboxylase activity cytosol | YGL063W	-0.00102251	0.486895	-0.293985	0.0121303	-0.0981492	0.671343	0	0.432649	0.328965	-0.17302	0.417274	0.405282	1.08507	0	0.371756	0.527806	-0.303259	-0.0554515	-0.70198	0.078713
YMR232W	YMR232W ... FUS2 plasma membrane fusion molecular function unknown mitochondrion* | YMR233W	-0.294094	0.474011	-0.46422	0.980879	0.329791	1.98402	0	-0.510106	-0.12625	-0.625485	0.437039	0.323762	1.28614	0	1.13107	1.74945	-0.257038	0.742809	-0.328637	0.61239
YOR128C	YOR128C ... ADE2 purine nucleotide biosynthesis phosphoribosylaminoimidazole carboxcytoplasm | YOR129C	-0.104053	0.603858	0.246656	-0.0909013	0.471387	-0.0314491	0	0.275743	0.227308	0.233707	-0.0669271	0.0553328	0.218218	0	0.528825	0.993077	-0.0303818	0.0539713	-0.0108117	0.0630783
YOR109W	YOR109W ... INP53 cell wall organization and bio inositol-polyphosphate 5-phosphatasmembrane fraction* | YOR110W	-0.119525	0.301145	0.0797712	-0.0741089	0.122845	0.715846	0	-0.143965	-0.291027	0.0807826	-0.219521	-0.0881181	0.346095	0	0.21825	0.42497	-0.026702	0.186039	-0.56015	-0.0132758
YLR036C	YLR036C ... YLR036C biological process unknown molecular function unknown cellular component unknown | YLR037C	0.147377	-0.118565	-0.163259	0.859026	-0.619676	-0.29943	0	-0.296961	0.395209	-0.15772	0.93317	-0.280746	0.262338	0	1.74663	1.36729	-0.407127	0.259	0.245457	0.25953
YDL124W	YDL124W iESR cluster YDL124W metabolism alpha-keto amide reductase activitycytoplasm* | YDL125C	0.888564	1.38466	0.872263	0.950152	1.2927	0.818555	0	-0.19225	0.532808	0.579431	0.711775	0.553369	0.385143	0	1.27285	1.80263	-0.119386	0.252051	-0.963707	-0.791618
YOR069W	YOR069W ... VPS5 protein-Golgi retention* protein transporter activity endosome* | YOR070C	-0.0331954	0.416335	-0.175995	0.337728	-0.752622	0.461271	0	-0.0194268	-0.136924	0.101939	0.325545	-0.456966	0.357739	0	0.435589	1.09179	0.0979091	0.364505	-0.818769	0.243555
YDR088C	YDR088C ... SLU7 nuclear mRNA splicing, via spl protein binding* spliceosome complex | YDR089W	-0.0876432	0.643936	0.303617	0.491962	-0.52733	0.8819	0	0.736054	0.764815	0.641454	0.402687	-0.199691	0.404782	0	0.72389	1.60932	0.0211279	0.184896	-1.43151	0.159128
YJR101W	YJR101W ... RSM26 protein biosynthesis structural constituent of ribosome mitochondrial small ribosomal subun | YJR102C	-0.351357	0.140767	-0.202	0.39347	0.168289	0.599556	0	-0.2451	-0.0413615	-0.47048	0.123263	0.10482	0.619095	0	0.575572	0.544828	0.512503	0.588582	0.265314	0.544825
YJL026W	YJL026W ... RNR2 DNA replication ribonucleoside-diphosphate reductascytoplasm* | YJL027C	0.185052	-0.0965099	0.141522	0.108832	0.00653842	0.792069	0	0.744464	0.420192	0.212847	0.189042	0.235558	0.965026	0	1.76104	1.37112	-0.21901	-0.19394	-0.476799	0.574071
YER088C	YER088C ... DOT6 regulation of transcription fr molecular function unknown cytoplasm* | YER089C	0.601894	0.500829	0.412421	-0.273275	0.300024	0.995945	0	0.914182	0.783072	0.841126	-0.423114	0.263224	0.686694	0	0.885338	0.682292	0.354197	0.281242	-0.460363	0.35545
YER136W	YER136W ... GDI1 vesicle-mediated transport Rab GDP-dissociation inhibitor actimembrane fraction* | YER137C	-0.10994	0.232825	-0.327991	-0.107992	-0.288194	0.425211	0	-0.0817886	-0.143733	-0.190636	-0.0873088	-0.227468	0.176031	0	0.340073	0.409434	-0.206011	0.0440347	-0.677846	0.030037
YOR127W	YOR127W ... RGA1 actin filament organization* signal transducer activity* intracellular | YOR128C	-0.233028	0.343276	0.00790231	0.393661	-0.0130921	0.877398	0	0.258216	-0.0852839	-0.0820226	0.244876	-0.0921423	0.642039	0	0.390016	0.795566	-0.442132	0.0434655	-1.00339	0.123918
YJL016W	YJL016W ... YJL016W biological process unknown molecular function unknown cytoplasm | YJL019W	1.29007	1.41576	0.549277	0.110714	0.606748	0.909366	0	1.04922	1.21341	0.675088	-0.128447	-0.367096	-0.258847	0	1.46749	1.9787	-0.571699	-0.0246839	-1.49206	-0.724977
YJR127C	YJR127C … RSF2 (ZMS1) biological process unknown molecular function unknown bud neck* | Zinc-finger protein involved in transcriptional control of both nuclear and mitochondrial genes, many of which specify products required for glycerol-based growth, respiration, and other functionsYJR128W	0.49935	0.628339	-0.113581	-0.91364	-0.158663	0.804318	0	0.164624	0.313951	0.105395	-0.721381	0.0621638	0.763236	0	1.3658	1.43672	1.11578	0.698901	0.297903	1.24325
YLR206W	YLR206W ... ENT2 endocytosis* clathrin binding actin cortical patch | YLR207W	-0.193442	0.067139	0.123969	-0.0777917	0.153802	0.924454	0	0.0305055	-0.0901406	0.100597	-0.253589	-0.0807355	0.409224	0	0.374515	0.656738	0.147327	0.154153	-0.902017	0.25138
YNL317W	YNL317W ... PFS2 mRNA polyadenylylation* RNA binding mRNA cleavage and polyadenylation s | YNL318C	-0.251821	0.178813	-0.0651489	-0.233283	-0.136854	0.347461	0	0.190485	0.160343	0.0685466	0.0251874	-0.173059	0.489838	0	0.576098	0.773374	0.00488252	-0.233827	-0.412577	0.078958
YOR033C	YOR033C ... EXO1 mismatch repair 5'-flap endonuclease activity* nucleus | YOR034C	0.0547375	0.571622	0.0400333	0.261126	0.269367	1.37798	0	0.116267	0.18456	-0.0189163	-0.163996	-0.0645958	0.805645	0	0.932299	1.46866	0.0836596	0.37778	-0.351434	0.945691
YLR359W	YLR359W ... ADE13 purine nucleotide biosynthesis adenylosuccinate lyase activity cellular component unknown | YLR360W	0.0769847	0.402246	-0.0731928	-0.0799646	0.0966527	0.183411	0	0.739438	0.493373	-0.145201	0.119445	-0.0698688	0.299289	0	0.608408	0.713267	-0.071229	-0.0902536	-0.0370903	0.351536
YOR184W	YOR184W ... SER1 purine base biosynthesis* phosphoserine transaminase activitycytoplasm | YOR185C	-0.228282	0.246321	0.0329799	0.0968906	0.476248	1.01787	0	0.06486	0.230103	-0.438129	-0.0458194	0.315955	0.991185	0	0.449947	0.587086	-0.424522	-0.303492	-0.173069	0.511604
YOL049W	YOL049W ... GSH2 glutathione biosynthesis glutathione synthase activity intracellular | YOL050C	-0.302043	0.0283652	-0.151726	0.154351	-0.182247	0.495132	0	-0.12314	-0.226788	-0.462052	-0.185531	-0.318263	0.309593	0	0.347169	0.513979	-0.0774307	-0.11465	-0.71049	0.196616
YPL118W	YPL118W ... MRP51 protein biosynthesis* structural constituent of ribosome mitochondrial small ribosomal subun | YPL119C	-0.10518	0.360278	-0.129076	0.359733	0.435179	0.786361	0	-0.0235587	0.191441	-0.119639	0.202721	0.141911	0.582537	0	0.473123	1.03878	0.150192	0.378652	-0.359311	0.251336
YCL030C	YCL030C ... HIS4 histidine biosynthesis phosphoribosyl-ATP diphosphatase acintracellular | YCL031C	-0.475901	0.081178	0.537995	-0.0444129	0.506802	0.0592864	0	1.51557	1.40916	1.07918	1.36569	1.37155	1.50001	0	1.45433	2.10142	-0.863513	-0.989513	-0.598977	-0.68188
YPR035W	YPR035W ... GLN1 nitrogen compound metabolism* glutamate-ammonia ligase activity cytoplasm | YPR036W	-0.215839	0.194478	-0.0415054	0.0113324	-0.795996	0.0620269	0	1.11428	0.762372	0.95929	0.296733	0.0673455	0.89074	0	1.36062	1.49176	-0.0766945	-0.400319	-0.223228	0.880577
YPL272C	YPL272C ... YPL272C biological process unknown molecular function unknown cellular component unknown | YPL273W	0.189721	0.0342995	0.604149	0.358004	0.940145	1.05678	0	0.683498	0.76174	1.02121	0.326716	0.440919	0.622896	0	1.11822	1.50272	0.0541319	0.439009	-0.0184042	0.42855
YDL085C-A	YDL085C-A ... YDL085C-A biological process unknown molecular function unknown cytoplasm* | YDL085W	-0.547769	0.342766	-0.214678	0.440039	0.519367	0.302874	0	-0.0574949	0.287361	-0.283291	0.392625	0.175167	0.810688	0	0.446795	0.869263	-0.502718	-0.506896	-0.0295632	0.325208
Cluster_12	#N/A	0	0	0	0	0	0	0	0	0	0	0	0	0	0	0	0	0	0	0	0
YEL070W	YEL070W ... DSF1 biological process unknown molecular function unknown cellular component unknown | YEL071W	-0.239646	0.322008	0.836741	0.372025	1.40445	0.370422	0	-0.339025	0.623771	1.04083	0.348678	1.21174	1.32173	0	2.03975	2.61522	0.508808	0.786932	0.996985	1.01184
YJL167W	YJL167W ... ERG20 ergosterol biosynthesis* dimethylallyltranstransferase activcytosol | YJL168C	-0.276172	0.225961	0.409593	0.514514	0.893852	1.38411	0	-0.0452179	0.121781	0.175518	0.538513	0.540111	0.997097	0	0.21995	0.479432	0.281771	0.745915	0.149041	0.779755
YML130C	YML130C ... ERO1 protein folding* electron carrier activity endoplasmic reticulum | YML131W	1.36151	1.55756	0.410865	1.6489	0.690075	1.20798	0	0.105949	0.358115	0.310694	1.54044	0.870769	1.26581	0	0.544874	0.529346	0.322862	0.405735	0.476588	0.821209
YDR419W	YDR419W ... RAD30 DNA repair* eta DNA polymerase activity replication fork | YDR420W	0.559306	0.532995	0.333218	0.964513	0.717976	1.62696	0	0.746367	0.55749	0.593952	0.882653	0.698372	1.43762	0	0.740621	1.14625	0.225434	0.501955	0.131209	1.23684
YPL075W	YPL075W ... GCR1 positive regulation of transcr DNA binding* nucleus | YPL076W	0.107593	0.509781	0.277917	0.723798	-0.168323	0.935911	0	0.295254	0.303137	0.407471	0.778271	0.232161	0.959728	0	0.791461	0.839162	0.363074	0.70513	0.212918	1.1578
YJL034W	YJL034W ... KAR2 SRP-dependent cotranslational ATPase activity* endoplasmic reticulum lumen | YJL035C	0.303754	0.788914	0.176876	0.943655	-0.00991283	0.321501	0	-0.291298	0.110602	0.133386	1.21414	0.186817	0.705958	0	1.0289	1.10902	0.760386	0.801453	0.60545	1.031
YJL164C	YJL164C iESR cluster TPK1 protein amino acid phosphoryla protein serine/threonine kinase actcytoplasm* | YJL165C	0.621191	1.05209	0.697009	0.649049	1.67182	1.79575	0	-0.185635	0.116518	0.292053	0.343608	0.885235	1.13735	0	1.0161	1.37931	0.260237	0.525673	-0.0519058	0.533188
YNL155W	YNL155W ... YNL155W biological process unknown molecular function unknown cytoplasm* | YNL156C	0.291877	0.431632	0.319342	0.770766	0.319375	1.3667	0	0.207082	0.461011	0.831549	0.291027	0.292467	1.0142	0	1.18508	1.31228	0.332446	0.287361	-0.0737093	1.08296
YDR298C	YDR298C ... ATP5 ATP synthesis coupled proton t structural molecule activity* "proton-transporting ATP synthase, s" | YDR299W	0.200926	0.610868	0.91467	0.995407	1.09482	0.739911	0	0.0555556	0.347965	0.518784	0.486907	0.680686	0.763236	0	0.320865	0.448913	0.407732	0.318972	0.684848	0.56174
YNL242W	YNL242W ... ATG2 protein-vacuolar targeting* molecular function unknown extrinsic to membrane | YNL243W	0.597579	0.576937	0.486567	0.31354	0.540328	1.1401	0	0.821531	0.49248	0.773831	0.405767	0.622419	0.769546	0	0.799183	1.1225	0.282658	0.65582	-0.204501	0.295126
YML059C	YML059C ... NTE1 phosphatidylcholine metabolism hydrolase activity* endoplasmic reticulum | YML060W	0.298153	0.694323	0.259131	0.407308	0.676866	1.35326	0	0.127682	0.43854	0.0375986	0.159446	0.621034	0.890199	0	-0.100084	0.00119984	0.522762	0.6136	0.200166	0.925603
YPL240C	YPL240C ... HSP82 response to stress* "ATPase activity, coupled" cytoplasm | YPL241C	0.479773	1.20618	0.915052	1.72116	0.0880623	1.06472	0	0.245694	1.06703	1.71101	1.44113	0.982009	1.6969	0	0.732203	1.40575	1.29669	1.49177	0.418718	1.38282
YKR011C	YKR011C iESR cluster YKR011C biological process unknown molecular function unknown nucleus | YKR012C	0.58959	0.579805	0.347266	0.759812	1.28115	1.20325	0	0.274895	0.396964	0.265867	0.822331	1.10178	1.10073	0	1.39437	1.67662	0.514201	0.961457	0.386809	0.66392
YML128C	YML128C iESR cluster MSC1 meiotic recombination molecular function unknown mitochondrion* | YML129C	0.290868	0.968775	1.77174	0.565069	0.833708	1.18517	0	-0.129016	-0.154343	1.53289	-0.173708	0.316809	0.657036	0	1.08907	1.76776	1.0228	1.0311	0.261651	0.982743
YER017C	YER017C ... AFG3 protein complex assembly* ATPase activity* mitochondrial inner membrane* | YER018C	0.338575	0.742808	0.511785	0.511477	0.174715	0.811475	0	0.0452261	0.257272	0.704323	0.275286	0.30885	0.716843	0	-0.0532164	0.236038	0.531316	0.66727	-0.0620354	0.482536
YBL039W-B	YBL039W-B ... YBL039W-B biological process unknown molecular function unknown cellular component unknown | YBL040C	-0.0470012	0.244005	0.768634	1.51641	1.02278	1.16609	0	0.33309	0.609334	0.925005	1.35957	0.348885	0.729289	0	0.498358	0.706776	0.154049	1.24636	0.0794474	1.02773
YJR133W	YJR133W ... XPT1 purine nucleotide biosynthesis "transferase activity, transferring"cytoplasm | YJR134C	0.839011	1.07443	0.440308	0.950267	0.679773	0.975386	0	1.18454	1.2898	0.318378	0.743598	0.502967	1.01171	0	1.1847	1.42935	0.271787	0.415806	-0.0238218	0.614811
YNL144C	YNL144C ... YNL144C biological process unknown molecular function unknown mitochondrion | YNL145W	0.562414	1.40607	0.914744	0.950068	1.71902	2.27884	0	0.577508	1.44289	0.850142	1.02642	1.05347	1.39032	0	1.12924	2.0709	0.819149	1.38639	-0.037592	0.750335
YKR067W	YKR067W iESR cluster GPT2 phospholipid biosynthesis glycerol-3-phosphate O-acyltransfercytoplasm* | YKR068C	0.238531	0.481995	0.642056	0.358525	0.610879	1.19157	0	-0.15308	0.459673	0.405174	0.332755	0.477599	0.818112	0	0.300243	0.327562	0.466802	0.725127	-0.217534	0.438954
YKR080W	YKR080W ... MTD1 one-carbon compound metabolism methylenetetrahydrofolate dehydrogecytosol | YKR081C	0.374897	0.834002	0.125169	0.733824	-0.0166271	0.697206	0	1.09238	0.639599	0.0443976	0.369955	0.038731	0.714944	0	1.14761	1.32096	1.34253	1.25542	0.908176	1.61532
YAL028W	YAL028W ... FRT2 response to stress molecular function unknown endoplasmic reticulum | YAL029C	0.555883	0.78498	0.602276	0.428394	0.780828	0.697493	0	0.289146	0.440879	0.993844	0.597814	0.493474	0.711497	0	0.553853	0.883811	0.668622	0.741391	-0.0974303	0.248883
YDR332W	YDR332W … IRC3 biological process unknown helicase activity | Putative RNA helicase of the DEAH/D-box family; null mutant displays increased levels of spontaneous Rad52p foci; green fluorescent protein (GFP)-fusion protein localizes to the mitochondrionYDR333C	0.729722	0.84557	0.508702	1.38614	0.805766	1.51539	0	0.698486	0.321209	0.358087	1.04754	0.507327	1.17536	0	0.269851	0.615217	0.183741	0.756188	0.00948489	1.02563
YKL150W	YKL150W iESR cluster MCR1 response to oxidative stress* cytochrome-b5 reductase activity mitochondrial outer membrane* | YKL151C	0.422357	0.915098	0.972256	0.335499	2.18957	1.48526	0	-0.462897	0.538702	0.852991	-0.0370969	1.18265	0.744068	0	0.896195	1.44654	0.875162	0.913857	0.805766	0.405273
YGR127W	YGR127W iESR cluster YGR127W biological process unknown molecular function unknown cellular component unknown | YGR128C	0.648708	1.15102	1.45487	0.321213	1.11169	1.06589	0	0.690192	0.875292	1.43303	0.404862	0.231913	0.600178	0	0.868232	1.50401	0.868828	1.08629	0.119525	0.349316
YER158C	YER158C iESR cluster YER158C biological process unknown molecular function unknown cellular component unknown | YER159C	0.471556	0.17404	1.24062	-0.230104	1.54935	1.90447	0	0.443352	0.535751	1.92601	-0.641858	1.01394	0.741792	0	1.17258	0.967397	1.00271	0.791115	0.807167	1.50137
YBR035C	YBR035C ... PDX3 fatty acid metabolism pyridoxamine-phosphate oxidase acticellular component unknown | YBR036C	0.207334	0.377758	0.69869	0.859646	0.838373	1.09125	0	0.487137	0.35068	0.224043	0.674849	0.987538	1.17538	0	0.909643	0.692385	0.071756	0.166477	-0.267493	0.200119
YOL023W	YOL023W ... IFM1 translational initiation RNA binding* mitochondrion | YOL024W	0.26689	0.0589732	0.190645	0.979815	0.353464	1.08569	0	0.117361	-0.216448	0.243159	0.814158	0.514971	1.10484	0	0.177608	0.445292	0.67705	1.01556	-0.362258	0.699369
YKL093W	YKL093W iESR cluster MBR1 aerobic respiration molecular function unknown cellular component unknown | YKL094W	1.48282	0.514653	1.46477	0.29729	0.284158	1.91558	0	0.888906	0.0988161	1.37246	0.412381	0.141346	1.67835	0	1.58748	1.71671	0.850535	0.664075	0.368954	2.02649
YOL088C	YOL088C ... MPD2 protein folding protein disulfide isomerase activitendoplasmic reticulum | YOL089C	0.0321966	0.6314	0.44952	0.754749	0.379248	0.952109	0	0.0586504	0.326339	0.585322	0.735263	0.378789	1.06809	0	0.279414	0.474879	0.544135	0.426078	0.0920751	0.748925
YDR406W	YDR406W ... PDR15 transport "ATPase activity, coupled to transme"integral to membrane | YDR407C	0.547219	0.740073	0.579504	0.201575	0.348586	0.874745	0	0.843074	1.14886	0.768522	0.513219	0.434375	0.0578404	0	0.517294	0.679336	0.398582	0.68956	0.256092	0.651096
YDL146W	YDL146W … LDB17 biological process unknown molecular function unknown | Protein involved in the regulation of endocytosis; transiently recruited to actin cortical patches in a SLA1-dependent manner after late coat component assembly; GFP-fusion protein localizes to the periphery, cytoplasm, bud, and bud neckYDL147W	0.283032	0.638267	0.776589	0.861784	0.930521	1.57021	0	0.0263213	0.521612	0.0481234	0.721123	0.760578	1.12467	0	0.782748	1.08297	0.776623	0.966198	0.455823	1.09583
YGR205W	YGR205W ... YGR205W biological process unknown ATP binding cytoplasm* | YGR206W	-0.0835271	0.314188	0.267939	0.578587	1.26457	1.10273	0	-0.109133	0.307103	-0.107471	0.334769	0.389091	0.692127	0	1.54292	2.15563	1.33137	1.40468	0.896701	1.25217
YMR319C	YMR319C ... FET4 intracellular copper ion trans iron ion transporter activity integral to plasma membrane | YMR320W	-0.214318	0.210516	1.69686	0.786318	0.0390455	0.84066	0	0.31986	0.325417	1.33189	0.106144	0.536237	1.03762	0	1.51106	1.80978	0.913941	0.632082	0.547053	1.23362
YBR033W	YBR033W ... EDS1 biological process unknown molecular function unknown cellular component unknown | YBR034C	0.725588	0.859664	0.476745	0.378136	0.00091	1.24489	0	1.18109	1.19483	0.717824	0.750967	0.876868	2.44131	0	0.92045	0.631273	0.5172	1.259	-0.0725556	2.40089
YLR433C	YLR433C PAC cluster CNA1 cell wall organization and bio calcium-dependent protein serine/thcytoplasm* | YLR434C	0.158196	0.354575	0.436083	0.694205	0.604982	1.12423	0	0.4103	0.564343	0.428916	0.653747	0.566591	1.01967	0	0.578412	0.681047	0.442107	0.536306	0.385126	1.03888
YBR045C	YBR045C ... GIP1 spore wall assembly (sensu Fun protein phosphatase 1 binding prospore membrane* | YBR046C	1.21979	1.00008	0.209958	1.28397	-0.0452314	1.13439	0	1.46237	0.899745	0.62461	1.83254	0.129068	1.71593	0	1.16467	2.11598	0.910595	1.63493	0.196804	1.23329
YLR069C	YLR069C ... MEF1 translational elongation translation elongation factor activmitochondrion | YLR070C	0.218644	0.513977	0.322168	0.623684	0.621864	0.760517	0	0.211431	0.430438	0.17207	0.605227	0.623963	0.632142	0	0.484765	0.691355	0.997666	1.32245	-0.118822	0.204928
YLL009C	YLL009C ... COX17 cytochrome c oxidase complex a thioredoxin peroxidase activity* cytosol* | YLL010C	0.990221	0.877824	0.299084	1.77314	0.874487	1.42775	0	0.831573	0.640826	-0.118831	1.09558	0.87501	1.5717	0	1.2928	0.856497	0.787784	1.00726	0.235567	0.597425
YHR067W	YHR067W ... HTD2 fatty acid biosynthesis 3-hydroxyacyl-[acyl-carrier proteinmitochondrion | YHR068W	1.01132	1.53082	0.668365	1.12862	0.977827	1.77514	0	0.650394	0.888722	0.63563	0.878459	0.547833	1.38884	0	1.53053	1.62436	-0.0363576	0.161097	0.0706772	0.753996
YMR139W	YMR139W iESR cluster RIM11 protein amino acid phosphoryla protein serine/threonine kinase actcytoplasm | YMR140W	0.264826	0.94272	0.708585	0.676361	0.640625	0.99079	0	0.274895	0.652414	0.625788	0.589686	0.519588	0.814986	0	0.278485	0.728135	0.503026	0.517561	0.103753	0.576283
YPR068C	YPR068C ... HOS1 regulation of transcription, D histone deacetylase activity histone deacetylase complex | YPR069C	0.195291	0.629189	0.322168	0.885649	0.78368	1.33235	0	0.707485	0.624432	0.705959	1.01853	0.893128	1.49659	0	0.429147	0.475416	0.0744056	0.693822	0.482803	1.16642
YDL194W	YDL194W ... SNF3 signal transduction* receptor activity* plasma membrane | YDL195W	0.330209	0.210586	0.453412	0.387396	0.82657	0.916666	0	-0.0834515	0.344416	0.145598	0.431106	0.671267	0.773055	0	0.577267	0.636544	0.814912	0.814508	0.620016	0.915178
YDR216W	YDR216W ... ADR1 transcription* transcription factor activity nucleus | YDR217C	0.830743	0.887605	0.379883	0.318352	0.394468	2.14803	0	0.794269	0.940387	1.36158	0.711941	1.05023	2.04797	0	0.405877	1.09812	1.05195	1.75718	1.07945	1.80275
YOR136W	YOR136W ... IDH2 tricarboxylic acid cycle* isocitrate dehydrogenase (NAD+) actmitochondrion* | YOR137C	-0.411413	0.362446	0.752787	0.747292	0.308914	0.920003	0	0.192491	0.988991	0.68204	0.599039	0.200252	0.556707	0	0.788716	1.25128	0.566491	0.771454	0.542933	1.16517
YAL056W	YAL056W ... GPB2 signal transduction signal transducer activity cytoplasm* | YAL058W	0.18677	0.548396	0.420525	0.664794	0.841516	1.20066	0	0.180361	0.362628	0.847003	0.546823	0.730003	0.84421	0	0.391315	0.797822	0.296548	0.864504	0.285898	0.98684
YNL331C	YNL331C ... AAD14 aldehyde metabolism aryl-alcohol dehydrogenase activitycellular component unknown | YNL332W	-0.0580395	0.0456764	0.710982	1.14647	1.65431	1.92607	0	0.391702	-0.0140164	0.601976	0.827227	0.777839	1.21268	0	0.695696	0.708056	0.524778	0.847814	0.392605	1.13984
YFL036W	YFL036W ... RPO41 mitochondrial genome maintenan DNA-directed RNA polymerase activitmitochondrial matrix* | YFL037W	0.298799	0.676587	0.260146	0.230123	0.480197	1.29991	0	0.310541	0.27063	0.22164	0.195079	0.403046	0.893558	0	0.371795	0.746783	0.420298	0.56696	-0.303232	0.502922
YLR174W	YLR174W ... IDP2 glutamate biosynthesis* isocitrate dehydrogenase (NADP+) accytosol | YLR175W	0.475624	0.581875	0.401977	0.506567	1.55954	2.46192	0	-0.11829	0.0551337	0.238472	0.0968414	0.84848	1.37419	0	0.603372	0.195523	0.411847	0.886467	0.145036	1.10065
YLR301W	YLR301W ... YLR301W cotranslational protein-membra molecular function unknown endoplasmic reticulum membrane | YLR302C	0.151253	0.825486	0.635618	1.3738	0.579575	0.720427	0	0.368114	0.654595	0.00669492	1.55748	0.336368	0.825636	0	0.723412	0.890664	0.281074	0.447515	0.188349	0.344446
YCR091W	YCR091W iESR cluster KIN82 protein amino acid phosphoryla protein kinase activity cellular component unknown | YCR092C	0.605844	1.06162	0.866634	0.506567	1.04326	1.62094	0	0.682703	0.690528	0.794388	0.158707	0.654924	1.11014	0	1.04268	1.56324	0.484763	0.686405	-0.487856	0.30425
YAL005C	YAL005C ... SSA1 protein folding* ATPase activity* cytoplasm* | YAL007C	0.266714	0.689679	0.149175	0.417254	0.123954	0.544819	0	-0.361883	0.551264	0.401244	0.406273	0.761793	1.29375	0	0.464947	0.570327	0.758171	0.841516	0.382396	0.968788
YGL119W	YGL119W ... ABC1 ubiquinone biosynthesis molecular function unknown mitochondrion | YGL120C	0.416869	0.322008	0.61552	0.909619	0.999563	0.841052	0	0.239654	-0.00072	0.691969	0.789429	0.616126	0.818558	0	0.194969	0.318327	0.154297	0.526592	0.194925	0.369061
YLR077W	YLR077W ... FMP25 biological process unknown molecular function unknown mitochondrion | YLR078C	0.41092	0.864883	0.60618	0.863666	0.944615	1.63354	0	0.426134	0.210519	0.415509	0.602625	0.731586	1.36296	0	0.143703	0.607339	0.063374	0.563419	-0.034457	0.791311
YEL050C	YEL050C ... RML2 protein biosynthesis* structural constituent of ribosome mitochondrial large ribosomal subun | YEL051W	0.0010315	0.489182	0.184886	0.54186	0.483473	0.732243	0	0.0111615	0.427653	0.222002	0.36215	0.403249	0.763236	0	0.451641	0.753867	0.743358	0.612507	0.312782	0.367238
YOL108C	YOL108C ... INO4 positive regulation of transcr DNA binding* nucleus | YOL109W	0.423319	0.969706	0.754279	1.25665	1.00748	2.56223	0	-0.242884	-0.384048	0.789083	0.436834	0.307313	2.09156	0	0.727805	0.821537	-0.0178376	0.0191053	-0.940452	1.25481
YLR177W	YLR177W ... YLR177W biological process unknown molecular function unknown cytoplasm | YLR178C	0.814802	1.16716	1.72927	0.709601	0.732422	1.13368	0	0.152723	0.592729	1.40997	0.439126	0.361559	0.793211	0	0.799096	1.20823	1.10279	0.898204	0.127631	0.773869
YPL019C	YPL019C ... VTC3 vacuole fusion, non-autophagic molecular function unknown vacuolar membrane | YPL020C	-0.273998	0.152446	0.0874115	0.805443	-0.108755	1.2161	0	0.504523	0.332797	0.494657	1.07506	0.41342	1.372	0	1.25433	1.50779	0.968373	1.29852	0.650604	1.82316
YDR019C	YDR019C ... GCV1 one-carbon compound metabolism glycine dehydrogenase (decarboxylatmitochondrion* | YDR020C	0.0592771	0.632849	-0.0143956	0.381068	1.29529	1.25491	0	0.0530836	0.00616683	-0.16349	-0.529435	0.765303	1.14984	0	1.49042	1.72098	1.33935	1.08066	0.51898	0.956622
YJL053W	YJL053W ... PEP8 protein-Golgi retention* molecular function unknown endosome* | YJL054W	0.417466	0.787671	0.46334	0.810239	0.832563	1.26985	0	0.331424	0.264075	0.383289	0.743395	0.645146	0.960554	0	0.506495	0.7501	0.0222929	0.256417	-0.123608	0.446414
YAL017W	YAL017W ... PSK1 protein amino acid phosphoryla protein serine/threonine kinase actcytoplasm | YAL018C	0.387557	0.664521	0.507279	0.309651	0.816608	1.59366	0	0.369595	0.592856	0.794186	0.22398	0.693389	1.07007	0	0.518584	0.881245	0.439861	0.78144	-0.0293949	0.797144
YHR104W	YHR104W iESR cluster GRE3 response to stress* aldo-keto reductase activity* cytoplasm* | YHR105W	0.373668	0.931382	0.735446	0.576503	1.17436	1.29099	0	-0.167528	0.479304	0.922541	0.382444	1.03007	0.975868	0	1.24345	1.5365	0.754132	0.896598	0.363513	0.780899
YER098W	YER098W ... UBP9 protein deubiquitination ubiquitin-specific protease activitcytoplasm | YER099C	0.364425	1.09504	0.893325	1.2791	0.648378	1.65195	0	0.922853	0.835051	1.08946	1.11278	0.74891	1.36552	0	1.21223	1.78948	1.20836	1.27617	0.0667364	1.13591
YGR238C	YGR238C ... KEL2 conjugation with cellular fusi molecular function unknown bud neck* | YGR239C	0.743076	0.990802	0.738159	1.43087	0.467436	1.92501	0	0.818516	0.952283	1.05147	1.22404	0.699373	1.78116	0	0.0223297	0.597748	0.841384	1.1387	0.345259	1.68022
YLR178C	YLR178C iESR cluster TFS1 regulation of proteolysis and lipid binding* soluble fraction | YLR179C	0.752086	0.913518	1.13747	0.499026	2.54196	1.63486	0	-0.0647386	0.415436	0.843203	-0.354757	1.11609	0.717855	0	0.695064	1.15925	0.793782	0.80987	0.273748	-0.075552
YGL256W	YGL256W ... ADH4 fermentation "alcohol dehydrogenase activity, zin"mitochondrion | YGL257C	0.0182752	0.300634	0.478825	0.566406	-0.167697	0.788719	0	0.164737	0.313916	0.715213	1.05598	0.0936183	0.976824	0	0.382113	0.344094	0.514294	0.424142	0.274069	1.13614
YBR066C	YBR066C ... NRG2 invasive growth (sensu Sacchar transcriptional repressor activity nucleus | YBR067C	0.610192	0.730704	0.964772	1.29831	1.02604	1.91765	0	0.790047	0.431094	1.10288	0.951722	0.506646	1.20341	0	1.55009	1.78885	0.241102	0.919185	-0.336631	0.882013
YPL040C	YPL040C ... ISM1 protein biosynthesis* isoleucine-tRNA ligase activity mitochondrion | YPL041C	0.463961	0.61994	0.299393	0.602602	0.448467	1.29451	0	0.378533	0.144201	0.200014	0.455652	0.559909	1.23133	0	0.21825	0.304476	0.483667	0.57932	-0.138858	0.75651
YPR130C	YPR130C ... | YPR131C	1.56771	7.95e-05	0.87981	1.32704	0.797254	0.800106	0	1.51896	0.414318	0.787502	1.00472	0.149808	0.38884	0	2.27714	1.13801	0.740911	0.661401	0.746872	0.210202
YGR132C	YGR132C ... PHB1 protein folding* molecular function unknown mitochondrion* | YGR133W	0.348606	0.523641	0.308692	0.516627	0.610612	0.912414	0	0.158122	0.218726	0.332793	0.306043	0.446201	0.721476	0	0.458878	0.535138	0.320319	0.529521	0.195857	0.576972
YER087C-A	YER087C-A ... | YER087C-B	0.644877	0.781439	1.13761	0.886821	0.433021	0.839634	0	0.118077	-0.193365	0.901708	1.04654	0.159268	1.41531	0	1.00966	0.663472	0.952415	0.786932	1.32737	1.07896
YMR302C	YMR302C … iESR cluster YME2 rRNA processing* exonuclease activity mitochondrial inner membrane | Integral inner mitochondrial membrane protein with a role in maintaining mitochondrial nucleoid structure and number; mutants exhibit an increased rate of mitochondrial DNA escape; shows some sequence similarity to exonucleasesYMR303C	0.229508	0.20763	0.678176	0.651993	0.782714	1.26741	0	0.0289362	-0.375278	0.645369	0.27151	0.467806	0.642665	0	0.349235	0.2832	0.496899	0.596126	0.132494	0.760204
YDR223W	YDR223W ... CRF1 negative regulation of transcr transcriptional repressor activity cytoplasm* | YDR224C	0.252559	0.200017	1.02312	0.547402	1.5756	1.99798	0	0.105138	-0.0402479	0.799697	-0.0263036	0.468177	0.740361	0	1.20231	1.29355	0.79588	1.32585	-0.246323	0.261436
YER078C	YER078C ... YER078C proteolysis and peptidolysis metalloendopeptidase activity* mitochondrion* | YER078W-A	0.113286	0.588587	0.87467	0.805868	1.40467	1.79093	0	-0.0523549	0.330759	0.169601	0.533652	0.819757	1.01526	0	0.410219	0.831247	0.469401	0.704227	0.355082	0.931823
YEL047C	YEL047C ... YEL047C metabolism fumarate reductase (NADH) activity mitochondrion* | YEL048C	0.197306	0.649309	0.777444	0.877989	0.95937	0.928123	0	0.150825	0.515804	0.130389	0.653509	0.371147	0.695342	0	0.731942	0.809399	0.404948	0.512121	0.603134	0.849578
YOR291W	YOR291W … YPK9 biological process unknown molecular function unknown | Vacuolar protein with a possible role in sequestering heavy metals; has similarity to the type V P-type ATPase Spf1p; homolog of human ATP13A2 (PARK9), mutations in which are associated with Parkinson disease and Kufor?Rakeb syndromeYOR292C	-0.215108	0.297623	0.310009	0.272683	0.528792	1.08564	0	-0.106319	0.0559156	0.0500676	0.0343941	0.4163	0.605145	0	0.431881	0.452347	0.36288	0.483041	0.180621	0.665944
YKL035W	YKL035W iESR cluster UGP1 protein amino acid glycosylati UTP-glucose-1-phosphate uridylyltracytoplasm | YKL036C	-0.0783784	0.368175	0.992696	0.270818	1.02486	1.18868	0	-0.612324	-0.13078	0.842842	0.00877744	0.613153	0.835088	0	0.406514	0.651324	0.750392	0.729813	0.427371	0.717712
YHL016C	YHL016C ... DUR3 urea transport urea transporter activity plasma membrane | YHL017W	0.567709	0.669931	1.2841	0.65614	0.80499	1.79189	0	0.16644	0.465848	1.52257	0.691936	0.211735	1.32173	0	0.378427	0.611465	0.475977	0.5625	0.66441	1.42688
YOR230W	YOR230W ... WTM1 regulation of meiosis transcription corepressor activity nucleus | YOR231W	0.118091	0.583248	0.529156	0.31555	1.36057	1.3771	0	-0.100512	0.328971	1.06218	0.411051	1.15812	1.42579	0	1.30115	1.56642	0.368649	0.560576	0.244975	0.624699
YJL101C	YJL101C ... GSH1 response to cadmium ion* glutamate-cysteine ligase activity intracellular | YJL102W	-0.14222	-0.00629649	1.15713	0.423358	1.59403	1.7548	0	0.366108	0.42941	1.15947	0.0307185	1.17484	1.14272	0	1.06917	1.17629	0.138468	0.0122358	0.233627	0.69967
YLR080W	YLR080W iESR cluster EMP46 ER to Golgi transport molecular function unknown Golgi membrane* | YLR081W	0.257853	0.40001	1.58401	1.38678	1.17845	1.50793	0	0.190485	0.916818	1.43096	1.57458	1.38166	1.00551	0	0.774643	1.66347	0.599534	1.62614	-0.113198	0.341992
[truncated: 686 more rows]
